# Supplementary material for: 3D cell neighbour dynamics in growing pseudostratified epithelia
Source: eLife. 2021 Oct 5;10:e68135. doi: 10.7554/eLife.68135 (PMC8570695; doi:10.7554/eLife.68135)
Supplement: Figure 2—source data 1. [file elife-68135-fig2-data1.xls]

## Sheet: Figure 2-source data 1
dataset	layer	polygon.number	area	normalized_area
tube	basal	7	88.1859	1.79836
tube	basal	6	43.4569	0.886208
tube	basal	6	28.3127	0.577375
tube	basal	6	56.9763	1.16191
tube	basal	7	45.203	0.921816
tube	basal	6	36.0908	0.735993
tube	basal	5	30.515	0.622286
tube	basal	6	74.6081	1.52147
tube	basal	8	83.954	1.71206
tube	basal	7	39.3308	0.802065
tube	basal	6	25.8877	0.527923
tube	basal	8	60.0041	1.22365
tube	basal	6	61.1358	1.24673
tube	basal	6	112.268	2.28946
tube	basal	5	56.1533	1.14512
tube	basal	6	65.2521	1.33067
tube	basal	7	104.946	2.14014
tube	basal	6	55.9225	1.14042
tube	basal	5	27.3356	0.55745
tube	basal	4	30.1228	0.614288
tube	basal	5	18.7961	0.383305
tube	basal	7	47.202	0.962581
tube	basal	5	30.8009	0.628117
tube	basal	7	60.3325	1.23035
tube	basal	6	54.2261	1.10582
tube	basal	5	64.6849	1.31911
tube	basal	7	79.8548	1.62846
tube	basal	5	41.9874	0.856241
tube	basal	5	51.0795	1.04165
tube	basal	4	21.1647	0.431608
tube	basal	5	31.6372	0.645171
tube	basal	7	44.9452	0.916559
tube	basal	6	62.7386	1.27942
tube	basal	5	53.5588	1.09221
tube	basal	5	31.6104	0.644625
tube	basal	6	17.2413	0.351598
tube	basal	4	11.204	0.228481
tube	basal	7	101.986	2.07978
tube	basal	7	53.8878	1.09892
tube	basal	4	16.6889	0.340334
tube	basal	5	56.7468	1.15723
tube	basal	5	37.383	0.762344
tube	basal	5	47.8602	0.976004
tube	basal	6	26.6957	0.5444
tube	basal	5	45.3865	0.925558
tube	basal	6	27.9294	0.569559
tube	basal	5	29.3078	0.597668
tube	basal	6	45.6871	0.931688
tube	basal	5	34.6229	0.706058
tube	basal	6	52.3608	1.06778
tube	basal	6	39.0589	0.796521
tube	basal	5	28.1152	0.573348
tube	basal	5	51.8717	1.05781
tube	basal	7	57.1648	1.16575
tube	basal	5	28.8603	0.588543
tube	basal	7	65.4867	1.33546
tube	basal	5	27.5105	0.561016
tube	basal	6	45.9205	0.936448
tube	basal	7	53.6812	1.09471
tube	basal	6	32.0527	0.653645
tube	basal	4	22.8573	0.466124
tube	basal	6	37.6087	0.766947
tube	basal	5	17.1068	0.348856
tube	basal	7	55.4582	1.13095
tube	basal	6	24.0779	0.491016
tube	basal	7	75.2354	1.53426
tube	basal	6	48.7172	0.99348
tube	basal	7	107.871	2.19979
tube	basal	6	63.5684	1.29634
tube	basal	6	29.6025	0.603678
tube	basal	8	50.0712	1.02109
tube	basal	7	46.1442	0.94101
tube	basal	5	13.9271	0.284013
tube	basal	7	43.3303	0.883626
tube	basal	6	36.1455	0.737108
tube	basal	5	51.3669	1.04752
tube	basal	6	63.601	1.297
tube	basal	5	39.1566	0.798513
tube	basal	5	64.1644	1.30849
tube	basal	4	26.7149	0.544792
tube	basal	5	21.88	0.446195
tube	basal	4	37.1189	0.756959
tube	basal	8	53.0948	1.08275
tube	basal	6	29.4334	0.60023
tube	basal	6	60.1755	1.22715
tube	basal	6	64.5127	1.3156
tube	basal	5	43.6021	0.889169
tube	basal	6	52.548	1.0716
tube	basal	6	65.3494	1.33266
tube	basal	5	78.4834	1.6005
tube	basal	5	49.4664	1.00876
tube	basal	6	44.4549	0.90656
tube	basal	8	49.7671	1.01489
tube	basal	5	77.5817	1.58211
tube	basal	4	42.1643	0.859848
tube	basal	5	26.9753	0.550102
tube	basal	6	27.1737	0.554148
tube	basal	5	14.5149	0.296
tube	basal	5	37.1167	0.756914
tube	basal	7	56.9453	1.16127
tube	basal	5	31.5995	0.644402
tube	basal	8	45.4674	0.927208
tube	basal	8	58.7498	1.19807
tube	basal	6	26.9612	0.549815
tube	basal	5	22.1496	0.451693
tube	basal	7	21.4535	0.437497
tube	basal	5	24.8845	0.507465
tube	basal	6	53.2123	1.08515
tube	basal	5	25.7706	0.525535
tube	basal	6	30.139	0.614619
tube	basal	5	40.2738	0.821296
tube	basal	6	79.2258	1.61564
tube	basal	8	68.7458	1.40192
tube	basal	3	38.1223	0.777421
tube	basal	7	76.3157	1.55629
tube	basal	6	58.701	1.19708
tube	basal	7	51.974	1.0599
tube	basal	5	28.4752	0.580689
tube	basal	6	36.1196	0.73658
tube	basal	4	37.4872	0.764469
tube	basal	7	34.2816	0.699098
tube	basal	6	50.2211	1.02415
tube	basal	4	32.2728	0.658133
tube	basal	8	44.5454	0.908406
tube	basal	6	47.9685	0.978212
tube	basal	6	39.943	0.81455
tube	basal	6	34.7634	0.708923
tube	basal	5	48.7599	0.994351
tube	basal	5	42.6438	0.869627
tube	basal	7	47.2014	0.962569
tube	basal	7	72.1244	1.47082
tube	basal	7	38.347	0.782003
tube	basal	6	32.5367	0.663515
tube	basal	7	33.1003	0.675008
tube	basal	5	20.4153	0.416325
tube	basal	7	36.5561	0.745481
tube	basal	6	92.8136	1.89273
tube	basal	7	25.4884	0.51978
tube	basal	7	51.8759	1.0579
tube	basal	6	65.6986	1.33978
tube	basal	4	15.139	0.308727
tube	basal	7	72.8547	1.48571
tube	basal	5	31.6186	0.644792
tube	basal	5	12.968	0.264454
tube	basal	6	41.444	0.845159
tube	basal	6	61.7694	1.25965
tube	basal	6	26.1748	0.533778
tube	basal	6	29.3152	0.597819
tube	basal	6	35.9127	0.732361
tube	basal	6	54.6488	1.11444
tube	basal	6	25.1437	0.512751
tube	basal	5	45.0398	0.918488
tube	basal	5	51.52	1.05064
tube	basal	6	57.6012	1.17465
tube	basal	5	15.3298	0.312618
tube	basal	8	61.1076	1.24616
tube	basal	6	57.0365	1.16313
tube	basal	6	44.2424	0.902227
tube	basal	5	38.8001	0.791243
tube	basal	6	24.5438	0.500517
tube	basal	5	35.1024	0.715836
tube	basal	5	44.5439	0.908375
tube	basal	5	36.6225	0.746836
tube	basal	7	56.5609	1.15344
tube	basal	5	24.8725	0.50722
tube	basal	6	40.6938	0.829861
tube	basal	8	70.7828	1.44346
tube	basal	5	27.0662	0.551956
tube	basal	6	56.7478	1.15725
tube	basal	7	66.5131	1.35639
tube	basal	6	28.5903	0.583036
tube	basal	6	29.587	0.603362
tube	basal	4	20.4586	0.417208
tube	basal	5	49.6955	1.01343
tube	basal	5	54.189	1.10507
tube	basal	5	46.6662	0.951655
tube	basal	4	48.2079	0.983094
tube	basal	6	42.9937	0.876762
tube	basal	6	51.9622	1.05966
tube	basal	6	52.197	1.06444
tube	basal	6	31.5629	0.643656
tube	basal	3	23.5265	0.479771
tube	basal	4	23.5687	0.480632
tube	basal	6	48.0954	0.9808
tube	basal	4	22.2539	0.453819
tube	basal	5	23.8313	0.485987
tube	basal	7	61.0209	1.24439
tube	basal	5	26.0228	0.530678
tube	basal	5	33.7086	0.687413
tube	basal	6	58.5532	1.19406
tube	basal	6	48.6768	0.992657
tube	basal	5	15.3456	0.31294
tube	basal	7	32.9368	0.671674
tube	basal	7	53.5859	1.09277
tube	basal	7	47.6876	0.972484
tube	basal	8	56.6237	1.15472
tube	basal	5	15.6508	0.319164
tube	basal	8	70.7365	1.44252
tube	basal	5	43.1632	0.880219
tube	basal	8	81.4249	1.66048
tube	basal	5	39.2698	0.800821
tube	basal	5	24.3572	0.496712
tube	basal	5	70.21	1.43178
tube	basal	8	81.6943	1.66598
tube	basal	5	95.8091	1.95382
tube	basal	6	33.5707	0.684601
tube	basal	7	60.4238	1.23221
tube	basal	4	17.7762	0.362507
tube	basal	5	13.353	0.272305
tube	basal	7	39.1463	0.798303
tube	basal	5	26.8991	0.548548
tube	basal	5	47.8797	0.976401
tube	basal	6	71.7416	1.46301
tube	basal	6	41.513	0.846567
tube	basal	5	30.6585	0.625213
tube	basal	6	42.7286	0.871356
tube	basal	6	31.3847	0.640022
tube	basal	5	30.8471	0.629059
tube	basal	6	52.2075	1.06466
tube	basal	7	62.5276	1.27511
tube	basal	6	57.5143	1.17288
tube	basal	5	21.6878	0.442275
tube	basal	5	42.5588	0.867893
tube	basal	4	27.6117	0.56308
tube	basal	8	28.0805	0.57264
tube	basal	7	53.4185	1.08935
tube	basal	5	21.5262	0.43898
tube	basal	7	43.0519	0.877949
tube	basal	6	32.721	0.667273
tube	basal	4	22.1682	0.452072
tube	basal	7	65.4673	1.33506
tube	basal	6	35.144	0.716685
tube	basal	5	65.1418	1.32842
tube	basal	5	39.4822	0.805153
tube	basal	5	27.2056	0.554799
tube	basal	5	46.8006	0.954396
tube	basal	6	48.3215	0.985411
tube	basal	8	79.0221	1.61148
tube	basal	4	13.9839	0.285171
tube	basal	6	69.1106	1.40936
tube	basal	6	29.6851	0.605362
tube	basal	6	59.1711	1.20666
tube	basal	6	24.9057	0.507897
tube	basal	7	35.857	0.731225
tube	basal	6	42.8557	0.873948
tube	basal	5	58.8367	1.19985
tube	basal	6	61.8609	1.26152
tube	basal	5	25.3624	0.517211
tube	basal	6	47.6903	0.972539
tube	basal	5	64.2499	1.31024
tube	basal	7	52.9361	1.07952
tube	basal	4	22.6194	0.461273
tube	basal	7	81.2689	1.6573
tube	basal	7	68.4369	1.39562
tube	basal	7	79.1302	1.61369
tube	basal	6	58.1395	1.18563
tube	basal	8	46.3587	0.945384
tube	basal	5	34.9771	0.713281
tube	basal	7	44.1557	0.900459
tube	basal	5	63.4065	1.29304
tube	basal	5	35.179	0.717399
tube	basal	7	64.6265	1.31792
tube	basal	7	70.5159	1.43802
tube	basal	7	47.2543	0.963648
tube	basal	5	10.1568	0.207126
tube	basal	4	17.8444	0.363897
tube	basal	8	84.9967	1.73332
tube	basal	7	64.7378	1.32019
tube	basal	6	38.2984	0.781012
tube	basal	5	55.2243	1.12618
tube	basal	5	27.4559	0.559903
tube	basal	5	21.6962	0.442446
tube	basal	6	88.7701	1.81027
tube	basal	8	79.1981	1.61507
tube	basal	5	27.7468	0.565835
tube	basal	7	67.9178	1.38503
tube	basal	5	33.935	0.69203
tube	basal	5	34.1012	0.695419
tube	basal	8	67.9092	1.38486
tube	basal	6	38.6431	0.788041
tube	basal	5	37.4151	0.762999
tube	basal	8	48.5126	0.989308
tube	basal	5	22.0337	0.449329
tube	basal	4	28.0358	0.571729
tube	basal	6	20.1935	0.411802
tube	basal	7	36.6966	0.748347
tube	basal	5	59.1773	1.20679
tube	basal	6	60.8232	1.24036
tube	basal	6	40.8517	0.833081
tube	basal	5	43.2688	0.882372
tube	basal	5	72.5862	1.48024
tube	basal	7	60.481	1.23338
tube	basal	6	59.9444	1.22243
tube	basal	5	42.2202	0.860988
tube	basal	7	42.5045	0.866786
tube	basal	7	55.3989	1.12974
tube	basal	7	66.448	1.35506
tube	basal	5	22.2756	0.454262
tube	basal	6	54.2452	1.10621
tube	basal	6	34.5156	0.70387
tube	basal	7	62.8488	1.28166
tube	basal	5	54.961	1.12081
tube	basal	5	33.4467	0.682072
tube	basal	5	32.1024	0.654658
tube	basal	5	26.1422	0.533113
tube	basal	5	44.1503	0.900349
tube	basal	5	26.946	0.549505
tube	basal	6	23.4489	0.478189
tube	basal	5	50.0972	1.02162
tube	basal	6	30.6655	0.625356
tube	basal	7	62.7242	1.27912
tube	basal	6	64.5183	1.31571
tube	basal	6	36.1306	0.736804
tube	basal	8	60.013	1.22383
tube	basal	5	20.0685	0.409253
tube	basal	5	45.4717	0.927296
tube	basal	6	61.8096	1.26047
tube	basal	6	49.8095	1.01576
tube	basal	6	63.8899	1.30289
tube	basal	4	31.4305	0.640956
tube	basal	8	46.4569	0.947387
tube	basal	8	65.075	1.32706
tube	basal	7	38.2345	0.779709
tube	basal	4	25.9855	0.529917
tube	basal	4	15.6431	0.319007
tube	basal	4	11.4607	0.233716
tube	basal	4	4.70412	0.0959302
tube	basal	5	17.2677	0.352137
tube	basal	4	6.15991	0.125618
tube	basal	4	8.20686	0.167361
tube	basal	4	4.85433	0.0989934
tube	basal	6	14.9769	0.305421
tube	basal	5	8.29101	0.169077
tube	basal	7	11.9504	0.243702
tube	basal	6	60.7464	1.23879
tube	basal	7	65.8711	1.3433
tube	basal	3	12.6403	0.257771
tube	basal	4	10.6014	0.216192
tube	basal	5	24.0931	0.491326
tube	basal	5	61.1233	1.24648
tube	basal	7	25.8185	0.526512
tube	basal	7	29.6219	0.604074
tube	basal	6	38.4679	0.784468
tube	basal	7	66.0511	1.34697
tube	basal	6	68.8059	1.40315
tube	basal	6	57.6894	1.17645
tube	basal	5	16.4602	0.33567
tube	basal	7	95.8883	1.95543
tube	basal	5	87.462	1.7836
tube	basal	6	88.8498	1.8119
tube	basal	7	102.581	2.09191
tube	basal	7	78.507	1.60098
tube	basal	5	59.9364	1.22227
tube	basal	4	18.1884	0.370913
tube	basal	5	5.77694	0.117808
tube	basal	7	87.7057	1.78857
tube	basal	5	49.6994	1.01351
tube	basal	7	125.928	2.56803
tube	basal	9	68.8931	1.40492
tube	basal	7	60.2047	1.22774
tube	basal	4	7.4929	0.152801
tube	basal	5	35.3787	0.721471
tube	basal	4	9.41308	0.191959
tube	basal	7	48.3538	0.98607
tube	basal	6	52.0684	1.06182
tube	basal	6	25.182	0.513532
tube	basal	6	38.5819	0.786793
tube	basal	6	73.9763	1.50858
tube	basal	6	50.6279	1.03244
tube	basal	6	46.7329	0.953015
tube	basal	6	25.1775	0.51344
tube	basal	7	86.8258	1.77062
tube	basal	8	85.2006	1.73748
tube	basal	5	60.061	1.22481
tube	basal	4	9.42191	0.192139
tube	basal	5	42.8887	0.874621
tube	basal	7	101.135	2.06243
tube	basal	8	87.3072	1.78044
tube	basal	6	29.6981	0.605628
tube	basal	6	10.9662	0.223632
tube	basal	5	15.6796	0.319751
tube	basal	6	60.4272	1.23228
tube	basal	5	41.6124	0.848594
tube	basal	7	107.341	2.18898
tube	basal	5	20.5696	0.419472
tube	basal	6	68.2282	1.39136
tube	basal	8	68.3692	1.39424
tube	basal	5	71.6945	1.46205
tube	basal	6	54.5171	1.11176
tube	basal	6	37.8107	0.771066
tube	basal	4	10.7922	0.220083
tube	basal	6	69.2308	1.41181
tube	basal	6	65.3339	1.33234
tube	basal	7	67.0899	1.36815
tube	basal	4	13.0723	0.266581
tube	basal	6	38.1068	0.777105
tube	basal	7	79.0499	1.61205
tube	basal	4	10.0132	0.204197
tube	basal	6	39.9754	0.815211
tube	basal	6	61.3886	1.25189
tube	basal	6	65.5815	1.33739
tube	basal	5	47.159	0.961704
tube	basal	8	76.4937	1.55992
tube	basal	6	65.5046	1.33582
tube	basal	3	11.2274	0.228958
tube	basal	6	52.9745	1.0803
tube	basal	7	79.3563	1.6183
tube	basal	6	64.4214	1.31373
tube	basal	6	51.043	1.04091
tube	basal	8	108.069	2.20383
tube	basal	6	61.4478	1.25309
tube	basal	7	108.948	2.22176
tube	basal	5	46.8615	0.955637
tube	basal	7	57.6701	1.17606
tube	basal	6	67.4135	1.37475
tube	basal	4	22.3518	0.455816
tube	basal	5	32.2759	0.658196
tube	basal	8	100.303	2.04546
tube	basal	7	54.1505	1.10428
tube	basal	5	52.6236	1.07314
tube	basal	8	67.7356	1.38132
tube	basal	6	113.657	2.31779
tube	basal	7	119.57	2.43837
tube	basal	7	113.655	2.31774
tube	basal	6	78.3191	1.59715
tube	basal	7	79.7439	1.6262
tube	basal	8	135.735	2.76802
tube	basal	6	72.555	1.4796
tube	basal	7	101.84	2.0768
tube	basal	8	93.5659	1.90807
tube	basal	8	75.8117	1.54601
tube	basal	8	83.8568	1.71008
tube	basal	4	16.3034	0.332472
tube	basal	6	67.5239	1.377
tube	basal	5	18.5239	0.377754
tube	basal	8	74.5205	1.51968
tube	basal	6	42.5928	0.868587
tube	basal	5	11.6938	0.238469
tube	basal	8	52.8694	1.07816
tube	basal	8	116.634	2.37849
tube	basal	6	63.3615	1.29212
tube	basal	6	67.6938	1.38047
tube	basal	6	63.0358	1.28548
tube	basal	7	44.4784	0.907039
tube	basal	7	74.9364	1.52816
tube	basal	7	48.09	0.98069
tube	basal	8	71.1367	1.45068
tube	basal	6	70.4682	1.43704
tube	basal	6	37.9535	0.773978
tube	basal	6	58.8066	1.19923
tube	basal	5	57.9038	1.18082
tube	basal	8	112.162	2.2873
tube	basal	7	82.0203	1.67262
tube	basal	6	67.0717	1.36778
tube	basal	9	73.7083	1.50312
tube	basal	5	77.3501	1.57739
tube	basal	5	56.6981	1.15623
tube	basal	4	35.3054	0.719976
tube	basal	5	49.7555	1.01465
tube	basal	6	61.354	1.25118
tube	basal	7	60.113	1.22587
tube	basal	6	27.813	0.567185
tube	basal	6	26.269	0.535699
tube	basal	4	10.5719	0.215591
tube	basal	7	67.201	1.37042
tube	basal	5	40.2842	0.821508
tube	basal	5	49.7602	1.01475
tube	basal	5	62.9034	1.28278
tube	basal	6	45.4596	0.927049
tube	basal	8	113.433	2.31322
tube	basal	6	57.0219	1.16284
tube	basal	6	36.8864	0.752217
tube	basal	6	69.851	1.42446
tube	basal	7	44.665	0.910845
tube	basal	9	143.466	2.92567
tube	basal	8	120.316	2.45358
tube	basal	6	36.0576	0.735316
tube	basal	7	70.571	1.43914
tube	basal	7	90.7195	1.85003
tube	basal	6	61.6507	1.25723
tube	basal	5	67.1289	1.36895
tube	basal	7	72.2175	1.47272
tube	basal	5	38.0012	0.774951
tube	basal	6	32.6358	0.665536
tube	basal	5	16.1305	0.328946
tube	basal	5	34.1473	0.696359
tube	basal	5	9.44541	0.192618
tube	basal	5	9.24311	0.188493
tube	basal	8	84.8734	1.73081
tube	basal	9	107.168	2.18546
tube	basal	6	69.7344	1.42208
tube	basal	9	140.914	2.87363
tube	basal	5	59.2332	1.20793
tube	basal	5	30.5852	0.623718
tube	basal	6	89.1185	1.81738
tube	basal	7	94.5627	1.9284
tube	basal	5	17.0166	0.347016
tube	basal	7	83.2611	1.69793
tube	basal	7	49.2953	1.00527
tube	basal	6	89.09	1.8168
tube	basal	7	78.727	1.60546
tube	basal	6	55.4859	1.13151
tube	basal	7	25.2999	0.515936
tube	basal	4	23.5862	0.480989
tube	basal	9	104.175	2.12442
tube	basal	5	48.998	0.999207
tube	basal	7	25.5102	0.520225
tube	basal	4	12.2504	0.24982
tube	basal	6	24.8351	0.506457
tube	basal	6	31.6292	0.645008
tube	basal	6	20.2059	0.412055
tube	basal	8	51.2395	1.04492
tube	basal	4	5.99035	0.12216
tube	basal	4	10.6404	0.216988
tube	basal	8	73.9331	1.5077
tube	basal	8	120.663	2.46066
tube	basal	8	41.9934	0.856363
tube	basal	4	7.44025	0.151728
tube	basal	5	15.6719	0.319594
tube	basal	6	45.7026	0.932004
tube	basal	8	46.9059	0.956543
tube	basal	4	14.8436	0.302703
tube	basal	4	12.8134	0.261301
tube	basal	7	46.3815	0.945849
tube	basal	8	82.6967	1.68642
tube	basal	6	34.1726	0.696875
tube	basal	6	26.5456	0.541339
tube	basal	8	44.6691	0.910928
tube	basal	4	13.2767	0.270749
tube	basal	7	76.0817	1.55152
tube	basal	6	30.9875	0.631922
tube	basal	6	38.9949	0.795215
tube	basal	7	52.0407	1.06126
tube	basal	4	10.2128	0.208268
tube	basal	9	70.8801	1.44544
tube	basal	7	45.0366	0.918423
tube	basal	8	43.8991	0.895226
tube	basal	9	62.0916	1.26622
tube	basal	5	15.8999	0.324244
tube	basal	7	72.2162	1.47269
tube	basal	7	67.7144	1.38089
tube	basal	6	65.1584	1.32876
tube	basal	6	61.396	1.25204
tube	basal	6	35.9364	0.732844
tube	basal	6	56.0175	1.14235
tube	basal	7	81.7178	1.66646
tube	basal	9	114.259	2.33006
tube	basal	9	99.9627	2.03852
tube	basal	7	67.4815	1.37614
tube	basal	6	45.0239	0.918164
tube	basal	6	62.128	1.26696
tube	basal	8	99.9408	2.03807
tube	basal	5	36.7787	0.750021
tube	basal	6	39.1779	0.798947
tube	basal	6	38.4978	0.785078
tube	basal	6	11.7537	0.239691
tube	basal	6	43.0551	0.878014
tube	basal	6	58.1301	1.18544
tube	basal	6	34.4698	0.702936
tube	basal	5	14.3346	0.292323
tube	basal	4	14.1663	0.288891
tube	basal	8	83.5018	1.70284
tube	basal	7	56.4608	1.15139
tube	basal	3	12.7328	0.259658
tube	basal	6	82.0074	1.67236
tube	basal	7	98.996	2.01881
tube	basal	5	25.5731	0.521507
tube	basal	6	67.4743	1.37599
tube	apical	7	55.0336	2.16665
tube	apical	6	28.809	1.1342
tube	apical	9	53.4254	2.10333
tube	apical	6	41.9285	1.6507
tube	apical	6	41.7403	1.6433
tube	apical	4	14.8752	0.585629
tube	apical	6	30.38	1.19605
tube	apical	6	34.6516	1.36422
tube	apical	7	26.269	1.0342
tube	apical	7	30.0918	1.1847
tube	apical	5	48.0724	1.89259
tube	apical	8	56.5974	2.22821
tube	apical	8	60.8921	2.39729
tube	apical	7	39.5614	1.55751
tube	apical	5	30.0711	1.18388
tube	apical	7	41.5892	1.63735
tube	apical	5	27.4141	1.07928
tube	apical	6	53.1798	2.09366
tube	apical	8	38.6844	1.52299
tube	apical	9	32.346	1.27345
tube	apical	4	15.6465	0.615995
tube	apical	5	43.1476	1.6987
tube	apical	4	10.8991	0.429092
tube	apical	5	19.3343	0.761182
tube	apical	4	8.39487	0.330502
tube	apical	7	10.5475	0.41525
tube	apical	4	8.59672	0.338449
tube	apical	3	13.9239	0.548177
tube	apical	5	7.18385	0.282825
tube	apical	5	13.0456	0.513599
tube	apical	5	12.6206	0.496867
tube	apical	8	13.3981	0.527477
tube	apical	5	3.79464	0.149393
tube	apical	4	3.41868	0.134592
tube	apical	4	6.66333	0.262332
tube	apical	6	23.4934	0.924924
tube	apical	6	17.6478	0.694785
tube	apical	4	11.7105	0.461037
tube	apical	5	13.0176	0.512497
tube	apical	7	11.8667	0.467186
tube	apical	6	21.9469	0.864039
tube	apical	5	9.67445	0.380878
tube	apical	4	7.14359	0.28124
tube	apical	7	39.3068	1.54749
tube	apical	4	11.5154	0.453356
tube	apical	6	16.1476	0.635723
tube	apical	6	23.6239	0.930061
tube	apical	5	19.7374	0.777052
tube	apical	5	17.9906	0.708281
tube	apical	5	18.1679	0.715261
tube	apical	5	18.9398	0.745651
tube	apical	4	4.84478	0.190737
tube	apical	5	7.52331	0.296189
tube	apical	5	4.11603	0.162046
tube	apical	7	22.6479	0.891637
tube	apical	5	16.0938	0.633605
tube	apical	5	13.3498	0.525575
tube	apical	7	44.0595	1.7346
tube	apical	9	49.5027	1.9489
tube	apical	6	5.10576	0.201011
tube	apical	5	6.35886	0.250345
tube	apical	4	7.3444	0.289145
tube	apical	7	121.807	4.79548
tube	apical	4	18.2703	0.719293
tube	apical	5	12.7519	0.502036
tube	apical	5	5.43987	0.214165
tube	apical	6	7.71311	0.303661
tube	apical	4	20.2063	0.795512
tube	apical	3	1.86367	0.0733718
tube	apical	3	11.9498	0.470458
tube	apical	6	16.4058	0.645888
tube	apical	8	47.3806	1.86535
tube	apical	5	4.61623	0.181739
tube	apical	5	9.01287	0.354832
tube	apical	7	63.098	2.48414
tube	apical	8	75.1567	2.95888
tube	apical	5	10.7656	0.423836
tube	apical	6	5.68034	0.223632
tube	apical	7	33.3078	1.31131
tube	apical	5	8.58502	0.337988
tube	apical	8	41.2665	1.62464
tube	apical	5	12.2042	0.480473
tube	apical	6	9.44101	0.371688
tube	apical	5	9.68436	0.381269
tube	apical	7	9.57898	0.37712
tube	apical	8	28.5354	1.12342
tube	apical	5	26.7837	1.05446
tube	apical	9	98.2707	3.86887
tube	apical	5	30.514	1.20132
tube	apical	8	58.9375	2.32034
tube	apical	5	13.4119	0.52802
tube	apical	9	62.3901	2.45627
tube	apical	7	21.8605	0.860637
tube	apical	9	50.872	2.00281
tube	apical	4	9.50333	0.374141
tube	apical	5	5.98754	0.235727
tube	apical	5	10.6855	0.420683
tube	apical	5	17.3514	0.683116
tube	apical	6	12.7489	0.501918
tube	apical	4	3.79443	0.149385
tube	apical	5	2.7555	0.108483
tube	apical	8	72.8105	2.86651
tube	apical	7	70.1125	2.7603
tube	apical	6	24.7515	0.974455
tube	apical	7	20.1596	0.793674
tube	apical	4	5.01126	0.197291
tube	apical	8	40.604	1.59856
tube	apical	6	12.479	0.491292
tube	apical	5	4.38048	0.172457
tube	apical	4	3.93189	0.154797
tube	apical	6	11.6634	0.459182
tube	apical	9	24.5503	0.966533
tube	apical	5	13.5554	0.53367
tube	apical	5	6.8086	0.268051
tube	apical	7	8.8963	0.350243
tube	apical	5	4.34406	0.171024
tube	apical	5	8.45973	0.333055
tube	apical	8	86.0373	3.38725
tube	apical	5	4.1915	0.165017
tube	apical	6	32.7746	1.29032
tube	apical	8	16.5918	0.653211
tube	apical	4	2.62328	0.103277
tube	apical	6	18.0442	0.710391
tube	apical	7	43.3244	1.70566
tube	apical	6	7.86489	0.309637
tube	apical	6	31.3331	1.23357
tube	apical	4	21.0243	0.827717
tube	apical	6	18.1705	0.715364
tube	apical	6	59.0852	2.32616
tube	apical	6	47.6046	1.87417
tube	apical	5	9.06447	0.356864
tube	apical	7	82.3183	3.24083
tube	apical	6	16.9279	0.666443
tube	apical	8	31.3988	1.23616
tube	apical	5	9.40474	0.37026
tube	apical	6	58.2103	2.29171
tube	apical	6	11.3251	0.445864
tube	apical	8	45.411	1.78781
tube	apical	6	25.7329	1.01309
tube	apical	5	14.9547	0.588759
tube	apical	9	43.3468	1.70654
tube	apical	6	10.326	0.40653
tube	apical	5	17.1916	0.676825
tube	apical	4	3.81347	0.150134
tube	apical	7	31.2823	1.23157
tube	apical	4	4.92457	0.193878
tube	apical	6	11.8866	0.46797
tube	apical	9	94.8508	3.73423
tube	apical	6	32.4963	1.27936
tube	apical	5	10.9343	0.430478
tube	apical	6	14.0953	0.554925
tube	apical	6	14.347	0.564834
tube	apical	5	25.2117	0.992572
tube	apical	5	11.5696	0.45549
tube	apical	6	33.38	1.31415
tube	apical	5	32.5186	1.28024
tube	apical	6	24.9969	0.984116
tube	apical	6	17.9	0.704714
tube	apical	9	70.245	2.76551
tube	apical	6	8.33237	0.328041
tube	apical	6	18.3251	0.72145
tube	apical	4	9.12244	0.359146
tube	apical	7	92.0658	3.62459
tube	apical	6	11.5574	0.455009
tube	apical	4	14.6889	0.578295
tube	apical	8	29.8407	1.17481
tube	apical	6	14.293	0.562708
tube	apical	7	40.2079	1.58297
tube	apical	4	21.8957	0.862023
tube	apical	4	12.2356	0.48171
tube	apical	6	10.4549	0.411604
tube	apical	7	27.4618	1.08116
tube	apical	9	152.015	5.98476
tube	apical	4	4.99795	0.196767
tube	apical	9	24.9708	0.983088
tube	apical	6	52.6212	2.07167
tube	apical	6	54.3768	2.14079
tube	apical	5	14.0549	0.553335
tube	apical	4	5.5591	0.218859
tube	apical	6	19.5397	0.769269
tube	apical	9	63.5696	2.5027
tube	apical	5	11.2413	0.442565
tube	apical	6	6.35833	0.250324
tube	apical	6	7.88907	0.310589
tube	apical	5	4.94239	0.194579
tube	apical	7	32.4478	1.27745
tube	apical	9	84.541	3.32834
tube	apical	6	38.1321	1.50124
tube	apical	6	7.35138	0.28942
tube	apical	5	8.94856	0.3523
tube	apical	5	64.6185	2.544
tube	apical	7	59.0177	2.3235
tube	apical	4	2.36795	0.093225
tube	apical	5	30.3659	1.19549
tube	apical	7	29.3751	1.15648
tube	apical	4	44.2271	1.7412
tube	apical	5	27.4376	1.08021
tube	apical	6	10.9164	0.429773
tube	apical	6	13.8414	0.544929
tube	apical	4	8.79978	0.346443
tube	apical	9	20.2452	0.797044
tube	apical	4	2.66926	0.105087
tube	apical	5	6.48283	0.255226
tube	apical	7	10.0289	0.394833
tube	apical	4	10.4934	0.41312
tube	apical	9	37.6614	1.48271
tube	apical	4	17.5919	0.692585
tube	apical	6	16.3401	0.643302
tube	apical	6	33.71	1.32715
tube	apical	4	2.40264	0.0945908
tube	apical	8	17.2856	0.680526
tube	apical	4	2.59487	0.102159
tube	apical	7	36.1074	1.42153
tube	apical	4	9.36001	0.368499
tube	apical	6	23.8476	0.938868
tube	apical	6	23.8067	0.937258
tube	apical	6	19.1876	0.755407
tube	apical	6	29.4949	1.1612
tube	apical	6	12.0986	0.476316
tube	apical	6	15.2888	0.601913
tube	apical	7	49.05	1.93107
tube	apical	4	24.2534	0.954845
tube	apical	7	24.0992	0.948774
tube	apical	7	6.36026	0.2504
tube	apical	5	7.38633	0.290796
tube	apical	4	7.40118	0.291381
tube	apical	4	2.92277	0.115068
tube	apical	8	132.888	5.23174
tube	apical	7	39.672	1.56187
tip	basal	6	120.598	1.48127
tip	basal	7	123.683	1.51916
tip	basal	7	121.353	1.49054
tip	basal	6	62.6355	0.769333
tip	basal	6	71.6834	0.880466
tip	basal	6	48.845	0.599949
tip	basal	6	121.354	1.49056
tip	basal	8	183.406	2.25272
tip	basal	7	129.817	1.5945
tip	basal	7	103.487	1.2711
tip	basal	6	91.4206	1.12289
tip	basal	6	73.9573	0.908396
tip	basal	8	156.399	1.921
tip	basal	5	118.883	1.4602
tip	basal	6	122.924	1.50984
tip	basal	6	84.0914	1.03287
tip	basal	7	112.388	1.38043
tip	basal	7	101.395	1.2454
tip	basal	7	82.7706	1.01665
tip	basal	6	53.2613	0.654193
tip	basal	6	92.1521	1.13188
tip	basal	6	50.9883	0.626274
tip	basal	7	74.0597	0.909653
tip	basal	6	108.283	1.33001
tip	basal	5	60.55	0.743718
tip	basal	5	78.3259	0.962054
tip	basal	7	83.1278	1.02103
tip	basal	5	69.3096	0.851309
tip	basal	8	145.865	1.79162
tip	basal	5	59	0.724679
tip	basal	5	33.485	0.411286
tip	basal	5	48.7768	0.599111
tip	basal	5	82.6331	1.01496
tip	basal	6	149.31	1.83393
tip	basal	7	126.321	1.55156
tip	basal	8	128.49	1.5782
tip	basal	5	78.9815	0.970106
tip	basal	6	117.023	1.43736
tip	basal	5	60.8974	0.747985
tip	basal	6	77.9259	0.957141
tip	basal	7	135.694	1.66669
tip	basal	7	104.666	1.28558
tip	basal	6	106.623	1.30962
tip	basal	8	100.202	1.23075
tip	basal	8	119.984	1.47373
tip	basal	6	82.9028	1.01827
tip	basal	5	51.4813	0.632329
tip	basal	6	50.4108	0.619181
tip	basal	6	121.778	1.49576
tip	basal	6	107.008	1.31435
tip	basal	5	51.7044	0.63507
tip	basal	7	127.321	1.56385
tip	basal	6	80.9437	0.994207
tip	basal	7	147.776	1.81509
tip	basal	5	69.3981	0.852396
tip	basal	5	74.2868	0.912443
tip	basal	8	128.745	1.58134
tip	basal	5	128.516	1.57852
tip	basal	6	89.5919	1.10043
tip	basal	6	89.0069	1.09325
tip	basal	7	115.803	1.42237
tip	basal	4	63.2572	0.776969
tip	basal	7	94.1881	1.15688
tip	basal	6	98.7104	1.21243
tip	basal	7	101.059	1.24128
tip	basal	6	117.793	1.44682
tip	basal	7	62.3126	0.765367
tip	basal	8	107.871	1.32495
tip	basal	7	79.5664	0.97729
tip	basal	6	126.629	1.55535
tip	basal	6	75.3417	0.9254
tip	basal	6	50.7785	0.623697
tip	basal	6	67.3119	0.826772
tip	basal	6	52.2961	0.642337
tip	basal	6	62.8534	0.77201
tip	basal	8	109.485	1.34477
tip	basal	7	62.9933	0.773728
tip	basal	7	110.646	1.35903
tip	basal	4	84.7612	1.0411
tip	basal	4	28.1434	0.345677
tip	basal	5	34.4108	0.422658
tip	basal	6	98.6066	1.21116
tip	basal	7	87.5613	1.07549
tip	basal	6	37.0434	0.454993
tip	basal	6	55.1854	0.677826
tip	basal	6	69.9904	0.859671
tip	basal	8	90.1641	1.10746
tip	basal	6	59.8784	0.735469
tip	basal	6	145.048	1.78158
tip	basal	6	155.581	1.91096
tip	basal	5	106.146	1.30376
tip	basal	5	51.2069	0.628959
tip	basal	7	101.908	1.25171
tip	basal	7	118.859	1.45991
tip	basal	6	77.7312	0.954749
tip	basal	6	82.7344	1.0162
tip	basal	6	74.0241	0.909216
tip	basal	6	105.915	1.30092
tip	basal	6	64.65	0.794077
tip	basal	5	68.5626	0.842134
tip	basal	6	84.4305	1.03703
tip	basal	5	50.489	0.620141
tip	basal	6	95.5897	1.1741
tip	basal	5	69.4409	0.852922
tip	basal	5	93.0697	1.14315
tip	basal	6	140.97	1.73149
tip	basal	7	74.9136	0.920141
tip	basal	8	96.666	1.18732
tip	basal	6	99.724	1.22488
tip	basal	6	59.1426	0.726431
tip	basal	5	71.3711	0.87663
tip	basal	5	81.7418	1.00401
tip	basal	5	46.175	0.567154
tip	basal	7	157.954	1.9401
tip	basal	6	96.007	1.17923
tip	basal	8	88.6236	1.08854
tip	basal	5	80.4515	0.988162
tip	basal	6	104.545	1.2841
tip	basal	6	65.2593	0.801561
tip	basal	6	99.0711	1.21686
tip	basal	7	87.7429	1.07772
tip	basal	5	139.239	1.71023
tip	basal	7	93.9	1.15335
tip	basal	5	41.3875	0.50835
tip	basal	8	105.851	1.30014
tip	basal	5	85.7656	1.05343
tip	basal	5	24.1881	0.297095
tip	basal	6	102.237	1.25575
tip	basal	6	58.0436	0.712932
tip	basal	5	50.2248	0.616896
tip	basal	5	64.3298	0.790144
tip	basal	6	52.9425	0.650277
tip	basal	5	66.8794	0.82146
tip	basal	6	106.901	1.31303
tip	basal	6	102.819	1.2629
tip	basal	6	76.9042	0.944591
tip	basal	6	60.2686	0.740261
tip	basal	9	66.5148	0.816981
tip	basal	5	113.672	1.3962
tip	basal	7	112.161	1.37764
tip	basal	5	90.3009	1.10914
tip	basal	5	35.3431	0.434109
tip	basal	6	96.4772	1.185
tip	basal	6	67.2811	0.826394
tip	basal	5	65.2024	0.800862
tip	basal	6	114.544	1.40691
tip	basal	6	76.8621	0.944074
tip	basal	5	130.92	1.60805
tip	basal	7	42.5683	0.522854
tip	basal	5	33.8108	0.415288
tip	basal	7	132.917	1.63258
tip	basal	7	80.994	0.994825
tip	basal	5	71.8926	0.883035
tip	basal	5	71.006	0.872146
tip	basal	8	63.6825	0.782193
tip	basal	6	63.4987	0.779936
tip	basal	8	174.781	2.14678
tip	basal	6	57.6767	0.708426
tip	basal	4	75.3181	0.92511
tip	basal	7	128.151	1.57404
tip	basal	6	104.493	1.28346
tip	basal	7	114.799	1.41004
tip	basal	7	106.567	1.30893
tip	basal	8	111.156	1.3653
tip	basal	5	64.4024	0.791036
tip	basal	5	68.563	0.842139
tip	basal	5	87.4049	1.07357
tip	basal	6	75.6186	0.928801
tip	basal	6	129.104	1.58575
tip	basal	6	57.5488	0.706855
tip	basal	6	38.7095	0.475457
tip	basal	6	36.1083	0.443508
tip	basal	5	72.1248	0.885887
tip	basal	5	41.3891	0.50837
tip	basal	8	90.6296	1.11318
tip	basal	4	70.0236	0.860079
tip	basal	6	134.95	1.65755
tip	basal	6	66.4586	0.816291
tip	basal	7	132.489	1.62732
tip	basal	6	102.431	1.25813
tip	basal	4	24.3727	0.299363
tip	basal	6	100.002	1.22829
tip	basal	6	90.9562	1.11719
tip	basal	6	85.6794	1.05237
tip	basal	8	138.291	1.69859
tip	basal	5	71.1762	0.874236
tip	basal	6	105.413	1.29476
tip	basal	6	42.3414	0.520067
tip	basal	6	37.4131	0.459534
tip	basal	7	103.999	1.27739
tip	basal	6	125.096	1.53652
tip	basal	4	48.079	0.59054
tip	basal	5	74.5323	0.915458
tip	basal	6	74.6498	0.916901
tip	basal	4	74.2591	0.912102
tip	basal	7	97.138	1.19312
tip	basal	5	47.3351	0.581403
tip	basal	6	93.3049	1.14604
tip	basal	7	88.8537	1.09136
tip	basal	7	29.0771	0.357145
tip	basal	7	112.884	1.38652
tip	basal	8	99.4704	1.22177
tip	basal	6	68.6751	0.843516
tip	basal	7	72.3527	0.888687
tip	basal	6	68.5578	0.842075
tip	basal	6	78.7173	0.966861
tip	basal	6	110.958	1.36286
tip	basal	6	96.2469	1.18217
tip	basal	5	61.1155	0.750663
tip	basal	5	33.5686	0.412313
tip	basal	5	73.365	0.90112
tip	basal	4	85.0035	1.04407
tip	basal	4	59.215	0.72732
tip	basal	6	71.6012	0.879456
tip	basal	7	110.763	1.36047
tip	basal	7	106.475	1.3078
tip	basal	7	36.2503	0.445252
tip	basal	6	66.9368	0.822165
tip	basal	6	48.2886	0.593115
tip	basal	5	40.4339	0.496638
tip	basal	7	70.1964	0.862201
tip	basal	7	81.6886	1.00336
tip	basal	7	82.909	1.01835
tip	basal	4	42.5882	0.523098
tip	basal	9	131.556	1.61586
tip	basal	5	51.4528	0.631979
tip	basal	9	102.187	1.25513
tip	basal	6	42.7003	0.524475
tip	basal	5	37.2318	0.457307
tip	basal	4	58.6747	0.720684
tip	basal	7	44.1139	0.541838
tip	basal	4	51.3057	0.630173
tip	basal	5	62.8409	0.771856
tip	basal	7	56.2513	0.690918
tip	basal	5	24.132	0.296406
tip	basal	6	63.2459	0.776831
tip	basal	8	112.705	1.38432
tip	basal	5	54.8162	0.673291
tip	basal	6	26.8256	0.329491
tip	basal	6	27.8266	0.341786
tip	basal	4	8.32571	0.102262
tip	basal	7	93.5287	1.14879
tip	basal	6	24.4205	0.29995
tip	basal	4	12.0818	0.148397
tip	basal	8	119.95	1.47331
tip	basal	4	8.93105	0.109697
tip	basal	9	99.4205	1.22115
tip	basal	5	23.9127	0.293713
tip	basal	4	16.4357	0.201875
tip	basal	5	35.3007	0.433588
tip	basal	8	61.11	0.750596
tip	basal	7	155.574	1.91087
tip	basal	4	17.4669	0.214541
tip	basal	5	20.5267	0.252123
tip	basal	8	177.608	2.18151
tip	basal	7	26.7725	0.328839
tip	basal	5	66.9149	0.821896
tip	basal	5	16.4956	0.202611
tip	basal	7	109.722	1.34768
tip	basal	6	61.0081	0.749344
tip	basal	6	111.233	1.36624
tip	basal	6	101.012	1.2407
tip	basal	7	85.327	1.04805
tip	basal	4	18.753	0.230338
tip	basal	6	56.0868	0.688897
tip	basal	5	69.3803	0.852178
tip	basal	5	21.9004	0.268996
tip	basal	6	59.5539	0.731483
tip	basal	5	24.9536	0.306498
tip	basal	7	66.9523	0.822355
tip	basal	6	95.6764	1.17516
tip	basal	8	109.768	1.34825
tip	basal	5	91.4723	1.12353
tip	apical	6	55.1517	1.60256
tip	apical	3	14.6947	0.426988
tip	apical	8	44.7358	1.2999
tip	apical	8	52.3326	1.52064
tip	apical	7	27.0055	0.784707
tip	apical	5	25.986	0.755083
tip	apical	6	44.3887	1.28982
tip	apical	5	25.8013	0.749716
tip	apical	6	43.4229	1.26175
tip	apical	3	25.9182	0.753113
tip	apical	6	24.805	0.720766
tip	apical	5	22.9899	0.668024
tip	apical	5	17.1413	0.49808
tip	apical	6	31.6344	0.91921
tip	apical	5	18.1495	0.527375
tip	apical	6	10.6002	0.308013
tip	apical	3	13.4669	0.391312
tip	apical	7	101.336	2.94455
tip	apical	5	42.134	1.2243
tip	apical	6	32.9221	0.956627
tip	apical	6	14.689	0.426823
tip	apical	4	7.76432	0.22561
tip	apical	8	91.4992	2.65872
tip	apical	6	16.7834	0.48768
tip	apical	7	57.9878	1.68497
tip	apical	6	41.6812	1.21114
tip	apical	6	26.7833	0.77825
tip	apical	6	25.5343	0.741958
tip	apical	7	31.8383	0.925135
tip	apical	5	35.143	1.02116
tip	apical	6	17.9352	0.521149
tip	apical	6	46.8377	1.36098
tip	apical	5	32.6339	0.948253
tip	apical	6	23.2826	0.67653
tip	apical	3	11.8882	0.345439
tip	apical	5	34.3722	0.998763
tip	apical	6	42.731	1.24165
tip	apical	4	26.8018	0.778788
tip	apical	4	36.1804	1.0513
tip	apical	6	40.3617	1.1728
tip	apical	5	14.2516	0.414113
tip	apical	3	52.3704	1.52174
tip	apical	4	26.7732	0.777957
tip	apical	7	18.0826	0.525432
tip	apical	6	41.5037	1.20599
tip	apical	6	31.3037	0.909601
tip	apical	6	23.3093	0.677305
tip	apical	4	25.8554	0.751288
tip	apical	7	58.0669	1.68727
tip	apical	4	8.04199	0.233679
tip	apical	3	26.3857	0.766697
tip	apical	6	44.3257	1.28799
tip	apical	5	23.5386	0.683968
tip	apical	6	15.9385	0.46313
tip	apical	5	24.5622	0.713711
tip	apical	7	20.8883	0.606958
tip	apical	6	11.1538	0.324099
tip	apical	7	41.5867	1.2084
tip	apical	7	35.3622	1.02753
tip	apical	6	59.7204	1.73531
tip	apical	5	36.6988	1.06637
tip	apical	6	48.866	1.41991
tip	apical	7	25.7521	0.748287
tip	apical	6	65.1731	1.89375
tip	apical	6	26.3584	0.765904
tip	apical	4	19.9363	0.579295
tip	apical	8	85.4784	2.48377
tip	apical	7	62.3877	1.81282
tip	apical	5	28.4938	0.827953
tip	apical	6	13.8341	0.401982
tip	apical	6	22.1906	0.644799
tip	apical	5	38.2276	1.11079
tip	apical	5	14.2402	0.413782
tip	apical	6	43.7471	1.27117
tip	apical	6	24.6841	0.717253
tip	apical	7	109.103	3.17024
tip	apical	4	36.1785	1.05125
tip	apical	5	49.6711	1.44331
tip	apical	5	32.5581	0.946051
tip	apical	7	28.1131	0.816891
tip	apical	7	56.9756	1.65556
tip	apical	6	35.6141	1.03485
tip	apical	7	26.3083	0.764448
tip	apical	6	45.9407	1.33491
tip	apical	5	16.6422	0.483577
tip	apical	7	33.0485	0.9603
tip	apical	5	24.3225	0.706746
tip	apical	7	19.5122	0.566972
tip	apical	7	21.0772	0.612447
tip	apical	6	44.8224	1.30242
tip	apical	3	150.227	4.36519
tip	apical	8	78.1153	2.26982
tip	apical	4	14.6205	0.424832
tip	apical	6	23.0497	0.669762
tip	apical	6	54.731	1.59034
tip	apical	4	45.4494	1.32064
tip	apical	4	8.46286	0.245908
tip	apical	7	52.7422	1.53255
tip	apical	3	43.5438	1.26527
tip	apical	7	48.6587	1.41389
tip	apical	5	26.7723	0.777931
tip	apical	4	19.735	0.573446
tip	apical	4	35.4529	1.03017
tip	apical	6	80.1377	2.32859
tip	apical	5	12.7459	0.370361
tip	apical	5	13.7949	0.400843
tip	apical	5	15.2569	0.443324
tip	apical	8	60.5614	1.75975
tip	apical	4	7.03623	0.204454
tip	apical	4	27.7683	0.806872
tip	apical	6	34.9098	1.01438
tip	apical	6	17.5127	0.508872
tip	apical	4	26.5898	0.772628
tip	apical	4	13.1908	0.383289
tip	apical	4	7.77691	0.225976
tip	apical	5	11.2481	0.326839
tip	apical	7	28.6015	0.831082
tip	apical	4	82.8089	2.4062
tip	apical	6	17.0834	0.496398
tip	apical	4	17.2077	0.500009
tip	apical	6	48.1546	1.39924
tip	apical	4	8.72735	0.253593
tip	apical	5	51.9172	1.50857
tip	apical	6	48.7986	1.41796
tip	apical	6	43.2622	1.25708
tip	apical	4	9.64	0.280112
tip	apical	5	17.5613	0.510284
tip	apical	6	24.9143	0.723942
