# Supplementary material for: 3D cell neighbour dynamics in growing pseudostratified epithelia
Source: eLife. 2021 Oct 5;10:e68135. doi: 10.7554/eLife.68135 (PMC8570695; doi:10.7554/eLife.68135)
Supplement: Figure 2—source data 2. [file elife-68135-fig2-data2.xls]

## Sheet: Sheet1
dataset	layer	n	m
tip	apical	6	5.8
tip	apical	6	6
tip	apical	8	6
tip	apical	7	6
tip	apical	7	5.85714
tip	apical	4	6.5
tip	apical	5	6.6
tip	apical	7	6.28571
tip	apical	8	5.25
tip	apical	6	5.66667
tip	apical	5	6.8
tip	apical	6	6.16667
tip	apical	4	7
tip	apical	6	6.83333
tip	apical	7	5.5
tip	apical	6	5.66667
tip	apical	9	5.875
tip	apical	9	5.6875
tip	apical	6	6.33333
tip	apical	5	6.6
tip	apical	6	5.5
tip	apical	5	6.375
tip	apical	6	6
tip	apical	5	6.25
tip	apical	6	6.16667
tip	apical	4	6.75
tip	apical	5	6.375
tip	apical	6	6.33333
tip	apical	5	6.2
tip	apical	6	5.9
tip	apical	5	5.2
tip	apical	5	6
tip	apical	6	5.33333
tip	apical	5	7.2
tip	apical	5	6.2
tip	apical	7	6
tip	apical	5	6
tip	apical	8	5.625
tip	apical	4	7.75
tip	apical	6	6
tip	apical	5	6.8
tip	apical	6	5.7
tip	apical	7	6
tip	apical	6	6.33333
tip	apical	6	6
tip	apical	5	5.5
tip	apical	6	5.83333
tip	apical	6	5.3
tip	apical	5	5.125
tip	apical	5	6.2
tip	apical	5	6.4
tip	apical	4	6
tip	apical	8	5.625
tip	apical	7	5.57143
tip	apical	7	6.42857
tip	apical	7	6
tip	apical	5	6.25
tip	apical	4	7
tip	apical	4	6.25
tip	apical	5	6.5
tip	apical	5	5.6
tip	apical	5	5.8
tip	apical	4	6.25
tip	apical	7	5.57143
tip	apical	6	5.6
tip	apical	5	6.2
tip	apical	6	6
tip	apical	6	5.4
tip	apical	5	5.625
tip	apical	6	6
tip	apical	5	5.875
tip	apical	4	6.66667
tip	apical	6	5.7
tip	apical	6	6.83333
tip	apical	5	6.8
tip	apical	6	6.16667
tip	apical	6	5.66667
tip	apical	5	5.875
tip	apical	6	6
tip	apical	5	6.875
tip	apical	5	6.6
tip	apical	5	6
tip	apical	5	6.25
tip	apical	5	6.2
tip	apical	5	5.4
tip	apical	6	5.83333
tip	apical	6	5.83333
tip	apical	5	5.4
tip	apical	7	6.28571
tip	apical	5	5
tip	apical	6	6
tip	basal	7	6.14286
tip	basal	7	5.25
tip	basal	5	5.75
tip	basal	5	6
tip	basal	7	5.85714
tip	basal	6	6.16667
tip	basal	9	6
tip	basal	5	6.4
tip	basal	7	5.85714
tip	basal	3	6
tip	basal	6	6
tip	basal	5	6.2
tip	basal	6	6.16667
tip	basal	6	5.625
tip	basal	4	6.5
tip	basal	7	5.71429
tip	basal	4	7.16667
tip	basal	6	6.5
tip	basal	6	5.83333
tip	basal	7	5.71429
tip	basal	5	5.8
tip	basal	5	6.6
tip	basal	6	6.16667
tip	basal	6	6.5
tip	basal	5	6.375
tip	basal	6	6.16667
tip	basal	7	6
tip	basal	5	6.2
tip	basal	7	5.42857
tip	basal	5	6.4
tip	basal	5	6.25
tip	basal	6	6
tip	basal	4	7.5
tip	basal	7	5.71429
tip	basal	6	6
tip	basal	6	6.66667
tip	basal	5	6.4
tip	basal	7	6.28571
tip	basal	4	6.75
tip	basal	5	6
tip	basal	6	6.16667
tip	basal	5	6.8
tip	basal	6	6.66667
tip	basal	7	5.71429
tip	basal	6	6.33333
tip	basal	6	6.33333
tip	basal	5	6.4
tip	basal	6	5.66667
tip	basal	6	6
tip	basal	5	6
tip	basal	7	5.42857
tip	basal	5	6.4
tip	basal	7	5.71429
tip	basal	6	6
tip	basal	5	5.875
tip	basal	6	5.66667
tip	basal	6	6.16667
tip	basal	6	6
tip	basal	5	6.125
tip	basal	5	5.5
tip	basal	6	6.33333
tip	basal	5	5.8
tip	basal	6	6.16667
tip	basal	5	6.4
tip	basal	6	5.83333
tip	basal	6	6.16667
tip	basal	6	5.33333
tip	basal	5	5.875
tip	basal	5	6.2
tip	basal	7	5.71429
tip	basal	5	6.2
tip	basal	8	5.5
tip	basal	7	5.57143
tip	basal	6	6.16667
tip	basal	5	6.6
tip	basal	6	6
tip	basal	5	6
tip	basal	5	6.6
tip	basal	8	6
tip	basal	5	6.4
tip	basal	6	5.66667
tip	basal	7	6
tip	basal	6	6
tip	basal	5	6
tip	basal	5	6.125
tip	basal	6	5.83333
tip	basal	5	6.4
tip	basal	6	5.83333
tip	basal	7	6.28571
tip	basal	5	6.625
tip	basal	7	5.75
tip	basal	5	6.4
tip	basal	6	5.5
tip	basal	6	6.16667
tip	basal	5	6.2
tip	basal	4	7
tip	basal	7	6
tip	basal	7	6
tip	basal	6	6.33333
tip	basal	6	5.3
tip	basal	6	5.83333
tip	basal	8	6
tip	basal	6	6.33333
tip	basal	4	6.25
tip	basal	5	6.2
tip	basal	6	5.83333
tip	basal	6	5.5
tip	basal	6	6.33333
tip	basal	5	7
tip	basal	7	5.85714
tip	basal	8	6.125
tip	basal	5	6
tip	basal	5	6.4
tip	basal	5	6.6
tip	basal	5	6
tip	basal	6	6.16667
tip	basal	5	6
tip	basal	6	6
tip	basal	5	5.6
tip	basal	6	6.16667
tip	basal	5	6.6
tip	basal	6	5.83333
tip	basal	7	5.75
tip	basal	7	5.71429
tip	basal	5	6
tip	basal	5	6.6
tip	basal	4	6.5
tip	basal	6	6.33333
tip	basal	7	6
tip	basal	9	5.44444
tip	basal	6	5.66667
tip	basal	6	6.66667
tip	basal	8	5.75
tip	basal	6	5.83333
tip	basal	7	5.71429
tip	basal	5	6.4
tip	basal	5	6.4
tip	basal	6	5.83333
tip	basal	5	6.25
tip	basal	5	6.2
tip	basal	5	6.6
tip	basal	4	6.66667
tip	basal	5	6.6
tip	basal	6	6.16667
tip	basal	7	6.28571
tip	basal	5	6.4
tip	basal	5	5.8
tip	basal	7	6
tip	basal	5	6.2
tip	basal	8	6
tip	basal	8	5.5
tip	basal	5	6.8
tip	basal	6	6.16667
tip	basal	8	5.875
tip	basal	5	5.8
tip	basal	6	5.5
tip	basal	4	6.5
tip	basal	6	6.33333
tip	basal	6	6
tip	basal	6	6.5
tip	basal	5	6.6
tip	basal	7	6
tip	basal	9	5.88889
tip	basal	4	7.25
tip	basal	7	6.28571
tip	basal	5	6.2
tip	basal	9	5.55556
tip	basal	6	7
tip	basal	5	6.25
tip	basal	6	6
tip	basal	7	6.28571
tip	basal	4	6.75
tip	basal	6	6.16667
tip	basal	7	6.08333
tip	basal	4	6.25
tip	basal	6	5.6
tip	basal	4	6
tip	basal	6	5.83333
tip	basal	7	5.57143
tip	basal	6	5.5
tip	basal	4	6.16667
tip	basal	6	5.6
tip	basal	7	5.71429
tip	basal	8	5.5
tip	basal	5	6.8
tip	basal	4	6.66667
tip	basal	5	6.75
tip	basal	4	7
tip	basal	7	6
tip	basal	6	6.16667
tip	basal	7	6
tip	basal	6	6.5
tip	basal	8	5.75
tip	basal	5	7.4
tip	basal	6	5.83333
tip	basal	7	5.85714
tip	basal	5	6.25
tip	basal	9	5.88889
tip	basal	6	6.5
tip	basal	6	6.33333
tip	basal	5	6
tip	basal	8	5.625
tip	basal	6	6.16667
tip	basal	5	6.6
tip	basal	6	6.16667
tip	basal	6	5.66667
tip	basal	6	5.83333
tip	basal	7	6.14286
tip	basal	5	6.4
tip	basal	6	6.2
tip	basal	7	5.42857
tip	basal	5	6.6
tip	basal	6	6.33333
tip	basal	8	5.625
tip	basal	4	6.5
tip	basal	7	5.71429
tip	basal	6	6.5
tip	basal	7	6.14286
tip	basal	6	6.3
tip	basal	6	5.9
tip	basal	6	5.6
tip	basal	6	6
tip	basal	5	6.4
tip	basal	7	5.85714
tip	basal	7	6
tip	basal	5	6.2
tip	basal	7	5.71429
tip	basal	6	6.16667
tip	basal	6	6
tip	basal	6	5.83333
tip	basal	6	5.66667
tip	basal	4	6.5
tip	basal	6	5.83333
tip	basal	4	7
tip	basal	7	6.28571
tip	basal	5	6.4
tip	basal	7	5.66667
tip	basal	5	7
tip	basal	8	6
tip	basal	7	6.28571
tip	basal	5	6.4
tip	basal	6	5.33333
tip	basal	5	6.4
tip	basal	5	6.6
tip	basal	6	5.83333
tip	basal	7	6.28571
tip	basal	6	6
tip	basal	4	6.25
tip	basal	6	6
tip	basal	7	5.71429
tip	basal	5	6.6
tip	basal	4	6
tip	basal	7	6.28571
tip	basal	8	5.75
tip	basal	5	6.25
tip	basal	5	7
tip	basal	4	7.75
tip	basal	4	6.75
tip	basal	6	5.5
tip	basal	8	5.75
tip	basal	5	6.75
tip	basal	7	5.75
tip	basal	5	6
tip	basal	6	5.875
tip	basal	6	6.33333
tip	basal	4	6.75
tube	apical	n	m
tube	apical	6	5.7
tube	apical	9	5.42857
tube	apical	4	7
tube	apical	7	5.91667
tube	apical	5	5.66667
tube	apical	7	6.14286
tube	apical	7	5.33333
tube	apical	7	5.66667
tube	apical	5	5.6
tube	apical	5	6
tube	apical	4	7.33333
tube	apical	7	5.85714
tube	apical	7	5.66667
tube	apical	6	5.16667
tube	apical	4	5.33333
tube	apical	6	5.375
tube	apical	7	6.57143
tube	apical	5	5
tube	apical	8	6
tube	apical	6	6.5
tube	apical	6	5.66667
tube	apical	8	5.71429
tube	apical	5	4.75
tube	apical	6	5.66667
tube	apical	8	5.64286
tube	apical	5	5
tube	apical	5	5.375
tube	apical	5	5.4
tube	apical	4	5.5
tube	apical	8	5.75
tube	apical	6	5.6
tube	apical	5	5.875
tube	apical	5	6
tube	apical	5	5.4
tube	apical	5	5.5
tube	apical	6	6.2
tube	apical	7	5.5
tube	apical	8	5
tube	apical	4	5.75
tube	apical	6	5.66667
tube	apical	6	5.5
tube	apical	7	5.71429
tube	apical	4	8
tube	apical	4	5.75
tube	apical	6	5.8
tube	apical	7	5.4
tube	apical	8	5.875
tube	apical	5	6.2
tube	apical	6	6.5
tube	apical	8	5.875
tube	apical	6	6
tube	apical	5	7.2
tube	apical	10	5.8
tube	apical	9	5.625
tube	apical	5	6.2
tube	apical	4	6
tube	apical	7	5.33333
tube	apical	9	5.57143
tube	apical	5	6.2
tube	apical	6	6
tube	apical	7	6.14286
tube	apical	7	5.9
tube	apical	6	6.5
tube	apical	5	5.75
tube	apical	6	6.33333
tube	apical	5	5.75
tube	apical	7	5.58333
tube	apical	4	6.75
tube	apical	4	7.25
tube	apical	4	8
tube	apical	5	5.6
tube	apical	6	6.5
tube	apical	8	5.625
tube	apical	4	6.75
tube	apical	7	5.58333
tube	apical	6	5.5
tube	apical	4	6.25
tube	apical	6	5.5
tube	apical	7	6.28571
tube	apical	6	5.33333
tube	apical	5	6.125
tube	apical	4	6.25
tube	apical	4	6.25
tube	apical	6	5.83333
tube	apical	7	5.28571
tube	apical	5	6
tube	apical	5	6.4
tube	apical	4	7
tube	apical	6	6.5
tube	apical	7	5.3
tube	apical	6	6.16667
tube	apical	7	5.85714
tube	apical	3	6
tube	apical	4	5.16667
tube	apical	5	5.16667
tube	apical	7	4.8
tube	apical	4	6.25
tube	apical	6	6.16667
tube	apical	3	6.75
tube	apical	5	6.6
tube	apical	6	6.5
tube	apical	6	6
tube	apical	4	7.5
tube	apical	5	5.875
tube	apical	7	5.75
tube	apical	5	5.125
tube	apical	4	6.83333
tube	apical	4	6.25
tube	apical	3	5.75
tube	apical	5	5.5
tube	apical	3	6.75
tube	apical	6	5.5
tube	apical	6	6
tube	apical	5	7.2
tube	apical	5	6.2
tube	apical	5	6.4
tube	apical	5	6.75
tube	apical	5	6.4
tube	apical	5	6.66667
tube	apical	5	6
tube	apical	7	5.58333
tube	apical	8	5.42857
tube	apical	4	7
tube	apical	7	5.42857
tube	apical	4	7
tube	apical	6	6.33333
tube	apical	3	5.5
tube	apical	3	6.25
tube	apical	6	6.33333
tube	apical	5	6.2
tube	apical	8	5.25
tube	apical	5	6
tube	apical	4	5.25
tube	apical	7	5.28571
tube	apical	8	5.42857
tube	apical	5	6.4
tube	apical	4	6.5
tube	apical	3	7.25
tube	apical	4	7
tube	apical	5	6.2
tube	apical	5	5.2
tube	apical	5	6.2
tube	apical	5	6.875
tube	apical	4	5
tube	apical	4	6.33333
tube	apical	8	5.21429
tube	apical	6	6.16667
tube	apical	9	5
tube	apical	5	6
tube	apical	5	6.125
tube	apical	4	6.5
tube	apical	6	5.8
tube	apical	3	7.25
tube	apical	6	5.83333
tube	apical	6	6
tube	apical	4	6.25
tube	apical	5	6
tube	apical	6	6.16667
tube	apical	5	5.33333
tube	apical	6	6.5
tube	apical	4	6.75
tube	apical	5	6
tube	apical	5	5.4
tube	apical	4	6.5
tube	apical	6	5.375
tube	apical	4	6.25
tube	apical	4	6.75
tube	apical	7	5.66667
tube	apical	5	6
tube	apical	5	5.8
tube	apical	5	6.2
tube	apical	5	5.2
tube	apical	6	6.5
tube	apical	4	7
tube	apical	6	6.5
tube	apical	5	5.8
tube	apical	4	7.75
tube	apical	8	5.5
tube	apical	5	5.625
tube	apical	4	6.33333
tube	apical	9	5.22222
tube	apical	9	5.125
tube	apical	5	5.83333
tube	apical	5	7.2
tube	apical	5	6.4
tube	apical	4	7
tube	apical	5	5.375
tube	apical	5	6.75
tube	apical	4	7
tube	apical	5	6
tube	apical	4	6.75
tube	apical	4	7
tube	apical	7	5.25
tube	apical	5	6.2
tube	basal	n	m
tube	basal	7	6.42857
tube	basal	5	6
tube	basal	6	6.33333
tube	basal	7	6.28571
tube	basal	7	6.42857
tube	basal	8	5.625
tube	basal	5	6
tube	basal	7	6.14286
tube	basal	7	6.28571
tube	basal	5	5.8
tube	basal	4	7
tube	basal	5	6.6
tube	basal	7	5.57143
tube	basal	7	5.71429
tube	basal	5	6.8
tube	basal	3	4.5
tube	basal	3	4.5
tube	basal	5	5.8
tube	basal	6	6.16667
tube	basal	7	5.42857
tube	basal	5	6.6
tube	basal	5	6.2
tube	basal	6	6.16667
tube	basal	4	6.25
tube	basal	6	6
tube	basal	9	5
tube	basal	6	6.33333
tube	basal	5	6.8
tube	basal	8	5.25
tube	basal	5	6.4
tube	basal	7	5.85714
tube	basal	7	5.28571
tube	basal	4	6.75
tube	basal	8	5.75
tube	basal	9	5.55556
tube	basal	5	6.4
tube	basal	5	6.2
tube	basal	5	5.8
tube	basal	6	5.83333
tube	basal	5	5.6
tube	basal	7	6.14286
tube	basal	6	5.66667
tube	basal	7	5.85714
tube	basal	7	5.85714
tube	basal	5	6
tube	basal	5	6.2
tube	basal	5	6.6
tube	basal	6	6.33333
tube	basal	7	6
tube	basal	6	6.5
tube	basal	7	5.57143
tube	basal	6	6.16667
tube	basal	5	6.8
tube	basal	7	5.42857
tube	basal	6	5.83333
tube	basal	6	6.16667
tube	basal	8	5.75
tube	basal	6	6.33333
tube	basal	8	6
tube	basal	8	6.375
tube	basal	4	6.75
tube	basal	7	5.71429
tube	basal	6	5.83333
tube	basal	5	6
tube	basal	6	5.66667
tube	basal	6	5.5
tube	basal	7	6.14286
tube	basal	5	6.4
tube	basal	6	6
tube	basal	9	5.77778
tube	basal	4	7.25
tube	basal	7	5.57143
tube	basal	5	6.2
tube	basal	7	6.28571
tube	basal	8	6.125
tube	basal	5	6.4
tube	basal	4	7
tube	basal	7	6.28571
tube	basal	6	6.16667
tube	basal	6	6.16667
tube	basal	7	5.85714
tube	basal	5	6.6
tube	basal	8	6
tube	basal	8	6
tube	basal	7	6.28571
tube	basal	5	6.8
tube	basal	5	6.6
tube	basal	6	6.83333
tube	basal	6	6.16667
tube	basal	4	7.5
tube	basal	5	6.4
tube	basal	5	6.4
tube	basal	7	6
tube	basal	5	6.6
tube	basal	6	6.33333
tube	basal	7	6.28571
tube	basal	5	6.4
tube	basal	4	7
tube	basal	8	5.25
tube	basal	7	6.57143
tube	basal	8	6.375
tube	basal	5	6.8
tube	basal	5	6.4
tube	basal	7	5.85714
tube	basal	6	5.83333
tube	basal	5	6.2
tube	basal	6	6.33333
tube	basal	8	5.625
tube	basal	5	5.8
tube	basal	7	6.14286
tube	basal	7	6.42857
tube	basal	4	6.5
tube	basal	5	6.4
tube	basal	6	6.33333
tube	basal	6	6.16667
tube	basal	6	6.16667
tube	basal	6	5.5
tube	basal	6	6
tube	basal	6	6
tube	basal	6	6
tube	basal	8	5.625
tube	basal	5	6.2
tube	basal	6	6.16667
tube	basal	6	6.5
tube	basal	4	6.5
tube	basal	6	6
tube	basal	8	5.875
tube	basal	6	6.66667
tube	basal	9	5.77778
tube	basal	7	5.71429
tube	basal	5	6.4
tube	basal	5	6.2
tube	basal	6	6.33333
tube	basal	4	6.5
tube	basal	5	6.6
tube	basal	8	6.375
tube	basal	8	5.75
tube	basal	5	6.4
tube	basal	6	6.16667
tube	basal	5	6
tube	basal	4	5.75
tube	basal	6	6.33333
tube	basal	5	6.4
tube	basal	8	6
tube	basal	8	5.5
tube	basal	6	6.83333
tube	basal	9	5.66667
tube	basal	5	6.8
tube	basal	5	6.6
tube	basal	8	5.625
tube	basal	6	6.66667
tube	basal	5	6.8
tube	basal	7	6
tube	basal	8	5.75
tube	basal	5	6.4
tube	basal	5	6.6
tube	basal	7	5.85714
tube	basal	4	7.25
tube	basal	8	6
tube	basal	3	8
tube	basal	6	6.66667
tube	basal	10	5.6
tube	basal	5	6.4
tube	basal	5	6.6
tube	basal	5	6.8
tube	basal	7	5.85714
tube	basal	7	6
tube	basal	4	7
tube	basal	5	6.6
tube	basal	8	5.5
tube	basal	8	6.25
tube	basal	7	5.85714
tube	basal	7	6
tube	basal	6	6.83333
tube	basal	7	5.85714
tube	basal	4	7.75
tube	basal	10	5.5
tube	basal	7	6.14286
tube	basal	8	6.25
tube	basal	6	6.33333
tube	basal	4	6.75
tube	basal	7	5.85714
tube	basal	6	6.33333
tube	basal	6	6.16667
tube	basal	3	7.33333
tube	basal	8	5.875
tube	basal	5	6.6
tube	basal	7	6
tube	basal	6	5.66667
tube	basal	5	6
tube	basal	4	6.25
tube	basal	8	5.375
tube	basal	6	5.83333
tube	basal	7	5.28571
tube	basal	5	5.8
tube	basal	6	5.83333
tube	basal	7	5.85714
tube	basal	4	6.75
tube	basal	4	7.75
tube	basal	9	6.11111
tube	basal	5	6.6
tube	basal	6	6.16667
tube	basal	5	6.4
tube	basal	6	6.16667
tube	basal	7	6
tube	basal	5	6
tube	basal	6	6.16667
tube	basal	7	5.42857
tube	basal	5	6.4
tube	basal	6	6
tube	basal	4	7.25
tube	basal	4	6.66667
tube	basal	7	5.91667
tube	basal	6	7
tube	basal	8	5.25
tube	basal	4	6.5
tube	basal	6	6.33333
tube	basal	6	6.33333
tube	basal	5	6
tube	basal	6	5.66667
tube	basal	6	5.83333
tube	basal	6	6
tube	basal	6	5.5
tube	basal	7	5.16667
tube	basal	5	6.5
tube	basal	7	5.57143
tube	basal	6	6
tube	basal	5	6
tube	basal	6	6
tube	basal	5	5.8
tube	basal	7	5.85714
tube	basal	5	5.4
tube	basal	7	5.71429
tube	basal	6	6
tube	basal	6	6.16667
tube	basal	5	6.2
tube	basal	6	6
tube	basal	7	6
tube	basal	6	6.33333
tube	basal	6	6.16667
tube	basal	7	5.57143
tube	basal	6	5.83333
tube	basal	6	6.16667
tube	basal	6	6.5
tube	basal	5	6.6
tube	basal	5	7.4
tube	basal	8	5.875
tube	basal	5	6.2
tube	basal	6	5.66667
tube	basal	5	6.6
tube	basal	8	5.75
tube	basal	6	6.1
tube	basal	7	5.83333
tube	basal	4	6.33333
tube	basal	5	6.4
tube	basal	5	6.4
tube	basal	6	6.16667
tube	basal	4	6.75
tube	basal	7	6.28571
tube	basal	6	6.33333
tube	basal	6	6.33333
tube	basal	6	6.66667
tube	basal	7	4.85714
tube	basal	4	7.25
tube	basal	8	5.875
tube	basal	8	6.125
tube	basal	5	6.375
tube	basal	8	6.375
tube	basal	7	6
tube	basal	5	6.5
tube	basal	5	5.8
tube	basal	7	6
tube	basal	7	5.71429
tube	basal	5	6.6
tube	basal	6	6.33333
tube	basal	4	6
tube	basal	6	5.5
tube	basal	6	6.16667
tube	basal	6	6.33333
tube	basal	3	7.66667
tube	basal	5	6.8
tube	basal	6	6.33333
tube	basal	5	7
tube	basal	7	5.71429
tube	basal	7	6.14286
tube	basal	5	7.2
tube	basal	5	7.4
tube	basal	6	6
tube	basal	6	6.16667
tube	basal	5	6.4
tube	basal	5	6.6
tube	basal	8	6.125
tube	basal	5	6.6
tube	basal	7	6.42857
tube	basal	6	6.66667
tube	basal	5	6.4
tube	basal	7	5.85714
tube	basal	5	6
tube	basal	6	6.16667
tube	basal	6	6
tube	basal	6	6.16667
tube	basal	6	5.7
tube	basal	7	6
tube	basal	5	7
tube	basal	4	6.75
tube	basal	8	6.125
tube	basal	6	5.83333
tube	basal	4	7.25
tube	basal	6	6
tube	basal	9	5.33333
tube	basal	4	7.5
tube	basal	8	6
tube	basal	4	7.25
tube	basal	7	6
tube	basal	4	6
tube	basal	5	6.2
tube	basal	8	5.625
tube	basal	7	6.57143
tube	basal	7	5.57143
tube	basal	5	5.375
tube	basal	5	6.125
tube	basal	5	5.6
tube	basal	5	5.4
tube	basal	4	6.25
tube	basal	7	5.85714
tube	basal	4	6.5
tube	basal	8	5.5
tube	basal	6	6.5
tube	basal	5	6.4
tube	basal	6	5.83333
tube	basal	6	5.83333
tube	basal	6	6.16667
tube	basal	7	6
tube	basal	4	7.25
tube	basal	8	5.75
tube	basal	4	6.75
tube	basal	6	6
tube	basal	5	7
tube	basal	5	6.2
tube	basal	7	5.42857
tube	basal	5	6.6
tube	basal	6	6
tube	basal	8	5.625
tube	basal	5	7
tube	basal	8	5.375
tube	basal	7	5.85714
tube	basal	6	6
tube	basal	5	6.2
tube	basal	6	6.5
tube	basal	6	6.16667
tube	basal	6	6.16667
tube	basal	6	5.83333
tube	basal	5	6
tube	basal	6	5.83333
tube	basal	6	6
tube	basal	5	7
tube	basal	6	6.5
tube	basal	4	6.5
tube	basal	6	6.3
tube	basal	6	6.33333
tube	basal	6	6.16667
tube	basal	6	6
tube	basal	6	6
tube	basal	6	6.33333
tube	basal	6	5.83333
tube	basal	8	5.25
tube	basal	5	6.4
tube	basal	6	6.33333
tube	basal	6	6.33333
tube	basal	6	6.66667
tube	basal	5	7
tube	basal	4	6.75
tube	basal	5	6.6
tube	basal	9	6.22222
tube	basal	7	5.57143
tube	basal	6	5.5
tube	basal	4	7.75
tube	basal	8	5.875
tube	basal	5	7.2
tube	basal	5	6.8
tube	basal	5	6.8
tube	basal	7	6.14286
tube	basal	5	6.6
tube	basal	7	6.28571
tube	basal	5	6
tube	basal	7	5.57143
tube	basal	7	6
tube	basal	4	6.5
tube	basal	7	6
tube	basal	6	5.83333
tube	basal	7	5.28571
tube	basal	6	6.5
tube	basal	7	6.14286
tube	basal	6	6.66667
tube	basal	7	5.85714
tube	basal	6	6.33333
tube	basal	7	6
tube	basal	6	5.5
tube	basal	4	6.75
tube	basal	7	5.71429
tube	basal	4	7
tube	basal	8	5.75
tube	basal	6	6.83333
tube	basal	6	5.33333
tube	basal	6	6.5
tube	basal	7	5.71429
tube	basal	5	6.8
tube	basal	4	6.5
tube	basal	7	5.85714
tube	basal	6	5.83333
tube	basal	6	6.33333
tube	basal	4	7
tube	basal	5	6.6
tube	basal	5	6
tube	basal	6	5.83333
tube	basal	5	6.2
tube	basal	8	5.625
tube	basal	6	7
tube	basal	5	6.2
tube	basal	5	6.6
tube	basal	7	6
tube	basal	5	6
tube	basal	5	7
tube	basal	3	7.66667
tube	basal	7	6.14286
tube	basal	7	5.58333
tube	basal	8	5.875
tube	basal	6	6.16667
tube	basal	5	6.2
tube	basal	8	5.375
tube	basal	6	5.83333
tube	basal	8	5.5
tube	basal	7	5.71429
tube	basal	6	6.16667
tube	basal	9	5.44444
tube	basal	6	6.33333
tube	basal	5	6.8
tube	basal	6	6.16667
tube	basal	5	6.6
tube	basal	5	6.6
tube	basal	4	7
tube	basal	6	6.5
tube	basal	6	6.5
tube	basal	7	6
tube	basal	5	6.4
tube	basal	6	6.16667
tube	basal	4	6.75
tube	basal	7	5.85714
tube	basal	5	6.5
tube	basal	6	5.83333
tube	basal	5	6.6
tube	basal	7	5.71429
tube	basal	6	6.16667
tube	basal	5	7
tube	basal	6	6
tube	basal	5	7
tube	basal	7	6
tube	basal	5	6.8
tube	basal	9	6.33333
tube	basal	5	6.4
tube	basal	6	6.66667
tube	basal	5	6.8
tube	basal	6	6.83333
tube	basal	8	6.125
tube	basal	6	6.33333
tube	basal	7	5.85714
tube	basal	6	5.83333
tube	basal	5	6
tube	basal	5	6.6
tube	basal	6	6.66667
tube	basal	6	5.83333
tube	basal	6	6.33333
tube	basal	7	6.14286
tube	basal	5	6.6
tube	basal	5	6.6
tube	basal	6	6.33333
tube	basal	6	6.5
tube	basal	5	5.125
tube	basal	5	6.2
tube	basal	7	5.71429
tube	basal	6	6.5
tube	basal	5	6.6
tube	basal	6	6.66667
tube	basal	4	7.25
tube	basal	6	6.16667
tube	basal	4	7.25
tube	basal	8	5.625
tube	basal	5	6.4
tube	basal	5	6.2
tube	basal	7	5.57143
tube	basal	6	5.83333
tube	basal	7	6
tube	basal	5	6.6
tube	basal	6	6.16667
tube	basal	6	6.33333
tube	basal	7	6
tube	basal	4	6.75
tube	basal	5	6.6
tube	basal	6	6.16667
tube	basal	7	5.71429
tube	basal	5	6
tube	basal	6	6.83333
tube	basal	6	6.33333
tube	basal	7	5.85714
tube	basal	7	5.85714
tube	basal	7	5.71429
tube	basal	4	6.5
tube	basal	7	5.71429
tube	basal	6	6.16667
tube	basal	5	6.6
tube	basal	6	6.5
tube	basal	5	6.4
tube	basal	5	6.6
tube	basal	7	5.71429
tube	basal	7	6.14286
tube	basal	6	6.33333
tube	basal	5	6.2
tube	basal	6	6.5
tube	basal	6	6
tube	basal	5	6.4
tube	basal	7	6.14286
tube	basal	5	6.4
tube	basal	4	7.25
tube	basal	5	7.2
tube	basal	5	6.2
tube	basal	6	5.66667
tube	basal	6	5.83333
tube	basal	5	6.8
tube	basal	5	5.75
tube	basal	4	6.5
tube	basal	6	6.4
tube	basal	6	6.1
tube	basal	6	6.5
tube	basal	5	7
tube	basal	7	6.14286
tube	basal	7	6.28571
tube	basal	7	6
tube	basal	6	6.66667
tube	basal	4	6.75
tube	basal	6	7
tube	basal	7	6.14286
tube	basal	6	6.16667
tube	basal	4	6.75
tube	basal	6	6.16667
tube	basal	6	6.16667
tube	basal	7	6.14286
tube	basal	6	6
tube	basal	5	6.6
tube	basal	5	6.2
tube	basal	4	6.25
tube	basal	6	6.16667
tube	basal	6	6.16667
tube	basal	7	6
tube	basal	5	6.6
tube	basal	5	6.8
tube	basal	7	5.42857
tube	basal	6	5.66667
tube	basal	4	7.25
tube	basal	5	6
tube	basal	4	7
tube	basal	5	6
tube	basal	5	6.2
tube	basal	5	6.4
tube	basal	6	6.33333
tube	basal	3	6.33333
