# Supplementary material for: 3D cell neighbour dynamics in growing pseudostratified epithelia
Source: eLife. 2021 Oct 5;10:e68135. doi: 10.7554/eLife.68135 (PMC8570695; doi:10.7554/eLife.68135)
Supplement: Figure 3—source data 1. [file elife-68135-fig3-data1.xls]

## Sheet: b
cellId	area	neighbours	layerB	dataset
1	3.709	4	186	tip
1	5.333	4	187	tip
1	6.682	4	188	tip
1	7.755	4	189	tip
1	8.644	4	190	tip
1	9.41	4	191	tip
1	10.054	4	192	tip
1	10.759	4	193	tip
1	11.464	4	194	tip
1	12.169	4	195	tip
1	13.027	4	196	tip
1	13.885	4	197	tip
1	14.744	4	198	tip
1	15.633	4	199	tip
1	16.399	4	200	tip
1	17.227	4	201	tip
1	17.778	4	202	tip
1	18.545	4	203	tip
1	19.096	4	204	tip
1	19.587	4	205	tip
1	20.2	4	206	tip
1	20.384	4	207	tip
1	21.027	4	208	tip
1	21.671	4	209	tip
1	22.284	4	210	tip
1	23.204	4	211	tip
1	24.093	4	212	tip
1	25.165	4	213	tip
1	26.545	4	214	tip
1	27.832	4	215	tip
1	29.058	4	216	tip
1	30.652	5	217	tip
1	32.124	5	218	tip
1	33.748	5	219	tip
1	35.25	5	220	tip
1	36.997	6	221	tip
1	38.346	6	222	tip
1	40.062	6	223	tip
1	41.748	6	224	tip
1	43.281	6	225	tip
1	44.691	6	226	tip
1	46.193	6	227	tip
1	47.879	6	228	tip
1	49.565	6	229	tip
1	51.005	6	230	tip
1	52.722	6	231	tip
1	54.346	6	232	tip
1	55.94	6	233	tip
1	57.749	7	234	tip
1	59.557	7	235	tip
1	61.366	7	236	tip
1	63.174	7	237	tip
1	65.412	7	238	tip
1	67.343	7	239	tip
1	69.427	7	240	tip
1	71.358	7	241	tip
1	73.351	7	242	tip
1	75.742	7	243	tip
1	77.765	7	244	tip
1	79.91	7	245	tip
1	82.209	7	246	tip
1	84.661	7	247	tip
1	86.654	7	248	tip
1	88.585	7	249	tip
1	90.301	7	250	tip
1	92.049	7	251	tip
1	93.612	7	252	tip
1	94.685	7	253	tip
1	95.451	7	254	tip
1	96.646	7	255	tip
1	97.535	7	256	tip
1	98.056	7	257	tip
1	98.547	7	258	tip
1	99.344	7	259	tip
1	100.141	7	260	tip
1	100.417	7	261	tip
1	100.723	7	262	tip
1	100.938	7	263	tip
1	101.214	7	264	tip
1	101.428	7	265	tip
1	101.612	7	266	tip
1	101.888	7	267	tip
1	101.888	7	268	tip
1	101.735	7	269	tip
1	101.306	7	270	tip
1	100.754	7	271	tip
1	100.509	7	272	tip
1	100.233	7	273	tip
1	100.171	7	274	tip
1	100.018	7	275	tip
1	99.896	7	276	tip
1	99.681	7	277	tip
1	99.773	7	278	tip
1	99.865	7	279	tip
1	100.325	7	280	tip
1	100.723	7	281	tip
1	101.244	7	282	tip
1	101.704	7	283	tip
1	102.501	7	284	tip
1	103.114	7	285	tip
1	104.34	7	286	tip
1	105.045	7	287	tip
1	105.689	7	288	tip
1	106.332	7	289	tip
1	106.792	7	290	tip
1	107.129	7	291	tip
1	107.405	7	292	tip
1	107.467	7	293	tip
1	107.467	7	294	tip
1	107.068	7	295	tip
1	106.823	7	296	tip
1	106.149	7	297	tip
1	105.352	7	298	tip
1	104.187	7	299	tip
1	103.053	7	300	tip
1	100.999	7	301	tip
2	14.315	6	179	tip
2	27.464	6	180	tip
2	32.982	6	181	tip
2	36.262	6	182	tip
2	38.683	6	183	tip
2	40.308	6	184	tip
2	41.289	6	185	tip
2	41.81	6	186	tip
2	42.116	5	187	tip
2	42.024	5	188	tip
2	41.748	5	189	tip
2	41.258	5	190	tip
2	40.675	5	191	tip
2	40.062	5	192	tip
2	39.357	5	193	tip
2	38.591	5	194	tip
2	37.794	5	195	tip
2	37.089	5	196	tip
2	36.752	5	197	tip
2	36.415	5	198	tip
2	36.231	5	199	tip
2	36.445	5	200	tip
2	36.568	5	201	tip
2	37.212	5	202	tip
2	37.947	5	203	tip
2	38.928	5	204	tip
2	39.94	5	205	tip
2	41.227	5	206	tip
2	42.423	5	207	tip
2	43.771	5	208	tip
2	45.151	5	209	tip
2	46.346	5	210	tip
2	47.695	5	211	tip
2	49.227	5	212	tip
2	50.699	5	213	tip
2	51.741	5	214	tip
2	53.611	5	215	tip
2	54.959	5	216	tip
2	56.492	5	217	tip
2	58.117	5	218	tip
2	59.772	6	219	tip
2	61.212	6	220	tip
2	62.99	6	221	tip
2	64.492	6	222	tip
2	66.147	6	223	tip
2	67.895	6	224	tip
2	69.672	6	225	tip
2	71.266	6	226	tip
2	72.86	6	227	tip
2	74.485	6	228	tip
2	76.171	6	229	tip
2	77.642	6	230	tip
2	78.868	6	231	tip
2	80.247	6	232	tip
2	81.504	6	233	tip
2	82.546	6	234	tip
2	83.65	6	235	tip
2	84.569	6	236	tip
2	85.305	6	237	tip
2	85.949	6	238	tip
2	86.133	6	239	tip
2	86.715	6	240	tip
2	86.899	6	241	tip
2	87.175	6	242	tip
2	86.93	6	243	tip
2	86.96	6	244	tip
2	86.592	6	245	tip
2	86.47	6	246	tip
2	85.949	6	247	tip
2	85.152	6	248	tip
2	85.029	6	249	tip
2	84.048	6	250	tip
2	83.343	6	251	tip
2	82.73	6	252	tip
2	82.179	6	253	tip
2	81.657	6	254	tip
2	80.769	6	255	tip
2	80.186	6	256	tip
2	79.88	6	257	tip
2	79.45	6	258	tip
2	79.083	6	259	tip
2	78.654	6	260	tip
2	78.439	6	261	tip
2	78.47	6	262	tip
2	78.132	6	263	tip
2	77.979	6	264	tip
2	77.734	6	265	tip
2	77.366	6	266	tip
2	77.427	6	267	tip
2	77.673	6	268	tip
2	77.826	6	269	tip
2	77.979	6	270	tip
2	78.194	6	271	tip
2	78.47	6	272	tip
2	78.562	6	273	tip
2	78.5	6	274	tip
2	78.562	6	275	tip
2	78.316	6	276	tip
2	78.255	6	277	tip
2	78.01	6	278	tip
2	77.397	6	279	tip
2	77.182	6	280	tip
2	76.876	6	281	tip
2	76.63	6	282	tip
2	76.569	6	283	tip
2	76.416	6	284	tip
2	76.017	6	285	tip
2	75.987	6	286	tip
2	75.956	6	287	tip
2	75.711	6	288	tip
2	75.435	6	289	tip
2	75.129	6	290	tip
2	75.006	6	291	tip
2	74.669	6	292	tip
2	74.301	6	293	tip
2	73.902	6	294	tip
2	73.014	6	295	tip
2	72.4	6	296	tip
2	71.726	6	297	tip
3	50.086	6	175	tip
3	57.412	6	176	tip
3	62.316	6	177	tip
3	66.055	6	178	tip
3	68.998	6	179	tip
3	71.174	6	180	tip
3	72.891	6	181	tip
3	74.638	6	182	tip
3	76.079	7	183	tip
3	77.581	7	184	tip
3	79.021	7	185	tip
3	80.585	7	186	tip
3	82.24	7	187	tip
3	84.202	7	188	tip
3	85.52	7	189	tip
3	87.389	7	190	tip
3	89.075	7	191	tip
3	90.577	7	192	tip
3	91.987	6	193	tip
3	93.244	6	194	tip
3	94.531	6	195	tip
3	95.42	6	196	tip
3	96.493	6	197	tip
3	97.321	6	198	tip
3	98.148	6	199	tip
3	98.669	6	200	tip
3	99.099	6	201	tip
3	99.129	6	202	tip
3	99.129	6	203	tip
3	98.976	6	204	tip
3	98.823	5	205	tip
3	98.486	5	206	tip
3	97.627	5	207	tip
3	96.892	5	208	tip
3	96.401	5	209	tip
3	95.574	5	210	tip
3	94.807	5	211	tip
3	93.581	5	212	tip
3	92.508	5	213	tip
3	90.914	5	214	tip
3	89.29	5	215	tip
3	87.543	5	216	tip
3	85.796	5	217	tip
3	83.589	5	218	tip
3	81.596	5	219	tip
3	79.205	5	220	tip
3	77.121	5	221	tip
3	74.73	5	222	tip
3	72.033	5	223	tip
3	69.366	5	224	tip
3	66.577	5	225	tip
3	63.634	5	226	tip
3	60.324	5	227	tip
3	56.952	5	228	tip
3	53.427	4	229	tip
3	50.239	4	230	tip
3	46.653	4	231	tip
3	43.404	4	232	tip
3	40.001	4	233	tip
3	36.997	4	234	tip
3	34.33	4	235	tip
3	31.48	4	236	tip
3	29.12	4	237	tip
3	26.851	4	238	tip
3	24.89	4	239	tip
3	22.836	4	240	tip
3	21.089	4	241	tip
3	19.342	4	242	tip
3	17.533	4	243	tip
3	15.725	3	244	tip
3	13.855	3	245	tip
3	12.169	3	246	tip
3	10.054	3	247	tip
3	7.357	3	248	tip
3	4.475	3	249	tip
4	43.557	5	173	tip
4	41.564	5	174	tip
4	39.603	5	175	tip
4	37.58	5	176	tip
4	35.587	5	177	tip
4	33.411	5	178	tip
4	31.664	5	179	tip
4	30.07	5	180	tip
4	28.752	5	181	tip
4	27.74	5	182	tip
4	26.851	5	183	tip
4	25.717	5	184	tip
4	24.706	5	185	tip
4	23.694	4	186	tip
4	22.836	4	187	tip
4	21.824	4	188	tip
4	20.843	4	189	tip
4	19.709	4	190	tip
4	18.912	4	191	tip
4	17.87	4	192	tip
4	16.736	4	193	tip
4	15.847	4	194	tip
4	15.203	3	195	tip
4	14.744	3	196	tip
4	15.173	3	197	tip
4	15.234	3	198	tip
4	15.203	3	199	tip
4	15.173	3	200	tip
4	14.897	3	201	tip
4	14.345	3	202	tip
4	13.702	3	203	tip
4	13.303	3	204	tip
4	13.058	3	205	tip
4	13.242	3	206	tip
4	13.395	3	207	tip
4	13.793	3	208	tip
4	14.008	3	209	tip
4	14.131	3	210	tip
4	14.315	4	211	tip
4	14.498	4	212	tip
4	14.59	4	213	tip
4	14.928	4	214	tip
4	15.387	4	215	tip
4	15.939	4	216	tip
4	16.522	4	217	tip
4	17.472	4	218	tip
4	18.238	4	219	tip
4	19.004	4	220	tip
4	19.648	4	221	tip
4	20.353	4	222	tip
4	20.935	4	223	tip
4	21.426	4	224	tip
4	21.855	4	225	tip
4	22.284	4	226	tip
4	22.744	4	227	tip
4	23.541	4	228	tip
4	24.246	4	229	tip
4	25.38	4	230	tip
4	26.882	4	231	tip
4	29.181	4	232	tip
4	31.51	4	233	tip
4	34.484	5	234	tip
4	39.388	5	235	tip
4	45.549	5	236	tip
4	52.385	6	237	tip
4	58.3	6	238	tip
4	62.285	6	239	tip
4	64.676	6	240	tip
4	66.485	6	241	tip
4	67.711	6	242	tip
4	68.998	6	243	tip
4	69.856	6	244	tip
4	70.408	6	245	tip
4	71.144	6	246	tip
4	72.002	6	247	tip
4	72.554	6	248	tip
4	73.289	6	249	tip
4	74.117	6	250	tip
4	74.485	6	251	tip
4	74.975	6	252	tip
4	75.404	6	253	tip
4	76.171	6	254	tip
4	76.784	6	255	tip
4	77.274	6	256	tip
4	78.378	6	257	tip
4	79.328	6	258	tip
4	80.217	6	259	tip
4	80.799	6	260	tip
4	81.657	6	261	tip
4	82.669	6	262	tip
4	83.221	6	263	tip
4	84.079	6	264	tip
4	84.661	6	265	tip
4	84.907	6	266	tip
4	85.55	6	267	tip
4	86.286	6	268	tip
4	86.746	6	269	tip
4	87.635	6	270	tip
4	88.37	6	271	tip
4	89.443	6	272	tip
4	90.547	6	273	tip
4	91.619	6	274	tip
4	92.232	6	275	tip
4	92.662	6	276	tip
4	93.459	6	277	tip
4	94.286	6	278	tip
4	94.654	6	279	tip
4	95.267	6	280	tip
4	95.482	6	281	tip
4	95.727	6	282	tip
4	95.543	6	283	tip
4	95.972	5	284	tip
4	96.033	5	285	tip
4	95.819	5	286	tip
4	95.39	5	287	tip
4	94.991	5	288	tip
4	94.562	5	289	tip
4	94.347	5	290	tip
4	94.041	5	291	tip
4	93.428	5	292	tip
4	93.091	5	293	tip
4	92.386	5	294	tip
4	90.822	5	295	tip
4	89.045	5	296	tip
4	86.286	5	297	tip
4	83.282	5	298	tip
4	78.807	5	299	tip
4	73.565	5	300	tip
4	66.607	5	301	tip
4	54.837	5	302	tip
5	39.419	6	169	tip
5	44.905	6	170	tip
5	48.43	6	171	tip
5	51.189	6	172	tip
5	52.66	6	173	tip
5	53.304	6	174	tip
5	53.58	7	175	tip
5	53.212	7	176	tip
5	52.415	7	177	tip
5	51.281	7	178	tip
5	49.779	7	179	tip
5	48.032	7	180	tip
5	46.285	6	181	tip
5	44.2	6	182	tip
5	42.208	6	183	tip
5	40.369	6	184	tip
5	38.438	6	185	tip
5	36.844	6	186	tip
5	35.526	5	187	tip
5	34.392	5	188	tip
5	33.074	5	189	tip
5	32.124	5	190	tip
5	31.327	5	191	tip
5	30.53	5	192	tip
5	29.794	5	193	tip
5	29.058	5	194	tip
5	28.537	5	195	tip
5	28.047	5	196	tip
5	27.802	5	197	tip
5	27.587	5	198	tip
5	27.25	5	199	tip
5	27.158	5	200	tip
5	27.005	5	201	tip
5	27.005	6	202	tip
5	27.097	6	203	tip
5	27.158	6	204	tip
5	27.526	6	205	tip
5	27.832	6	206	tip
5	28.139	6	207	tip
5	28.629	6	208	tip
5	28.997	6	209	tip
5	29.671	6	210	tip
5	30.315	6	211	tip
5	30.989	6	212	tip
5	31.848	6	213	tip
5	32.859	6	214	tip
5	33.901	6	215	tip
5	34.852	6	216	tip
5	35.955	6	217	tip
5	36.967	6	218	tip
5	38.162	6	219	tip
5	39.204	6	220	tip
5	40.4	6	221	tip
5	41.319	6	222	tip
5	42.423	6	223	tip
5	43.802	6	224	tip
5	45.151	6	225	tip
5	46.561	6	226	tip
5	48.461	6	227	tip
5	50.178	6	228	tip
5	51.955	6	229	tip
5	54.101	6	230	tip
5	55.756	6	231	tip
5	57.687	6	232	tip
5	59.465	6	233	tip
5	61.12	6	234	tip
5	62.868	7	235	tip
5	64.4	7	236	tip
5	65.596	7	237	tip
5	66.914	7	238	tip
5	68.017	7	239	tip
5	68.998	7	240	tip
5	69.918	7	241	tip
5	70.5	7	242	tip
5	71.45	7	243	tip
5	72.309	7	244	tip
5	73.075	7	245	tip
5	73.78	7	246	tip
5	74.791	7	247	tip
5	76.14	7	248	tip
5	76.998	7	249	tip
5	77.765	7	250	tip
5	78.776	7	251	tip
5	79.236	7	252	tip
5	79.604	7	253	tip
5	80.002	7	254	tip
5	80.217	7	255	tip
5	80.554	7	256	tip
5	80.922	7	257	tip
5	81.136	7	258	tip
5	81.044	7	259	tip
5	81.044	7	260	tip
5	81.044	7	261	tip
5	80.799	7	262	tip
5	80.983	7	263	tip
5	80.615	7	264	tip
5	80.83	7	265	tip
5	80.952	7	266	tip
5	80.707	7	267	tip
5	80.922	7	268	tip
5	81.504	7	269	tip
5	81.964	7	270	tip
5	82.24	7	271	tip
5	82.73	7	272	tip
5	82.853	7	273	tip
5	83.251	7	274	tip
5	83.405	7	275	tip
5	83.65	7	276	tip
5	84.018	7	277	tip
5	84.171	7	278	tip
5	83.926	7	279	tip
5	83.895	7	280	tip
5	83.435	7	281	tip
5	82.393	7	282	tip
5	81.412	7	283	tip
5	78.837	7	284	tip
5	74.699	7	285	tip
5	67.803	7	286	tip
5	45.948	7	287	tip
6	61.243	8	167	tip
6	61.243	8	168	tip
6	61.243	8	169	tip
6	61.059	8	170	tip
6	60.538	8	171	tip
6	59.68	8	172	tip
6	58.638	8	173	tip
6	57.412	8	174	tip
6	55.848	8	175	tip
6	54.193	8	176	tip
6	52.783	8	177	tip
6	51.373	7	178	tip
6	50.024	7	179	tip
6	48.339	7	180	tip
6	46.867	7	181	tip
6	45.396	7	182	tip
6	44.2	6	183	tip
6	42.76	6	184	tip
6	41.994	6	185	tip
6	41.35	6	186	tip
6	40.706	6	187	tip
6	40.093	6	188	tip
6	39.541	6	189	tip
6	39.235	6	190	tip
6	38.898	6	191	tip
6	38.499	5	192	tip
6	38.591	5	193	tip
6	38.469	5	194	tip
6	38.683	5	195	tip
6	38.898	5	196	tip
6	39.357	5	197	tip
6	39.97	5	198	tip
6	40.277	5	199	tip
6	40.737	5	200	tip
6	41.442	5	201	tip
6	42.116	5	202	tip
6	42.821	5	203	tip
6	43.404	5	204	tip
6	44.231	6	205	tip
6	45.089	6	206	tip
6	46.162	6	207	tip
6	47.02	6	208	tip
6	48.216	6	209	tip
6	49.534	6	210	tip
6	50.975	6	211	tip
6	52.691	6	212	tip
6	54.254	6	213	tip
6	55.94	6	214	tip
6	57.197	6	215	tip
6	58.76	6	216	tip
6	59.986	6	217	tip
6	61.274	6	218	tip
6	62.347	6	219	tip
6	63.327	6	220	tip
6	64.37	6	221	tip
6	65.228	6	222	tip
6	66.147	6	223	tip
6	67.128	6	224	tip
6	68.262	6	225	tip
6	69.397	6	226	tip
6	70.807	6	227	tip
6	72.155	6	228	tip
6	73.289	6	229	tip
6	74.301	6	230	tip
6	75.251	6	231	tip
6	76.293	6	232	tip
6	76.876	6	233	tip
6	77.182	6	234	tip
6	77.734	6	235	tip
6	78.378	6	236	tip
6	78.562	6	237	tip
6	79.021	6	238	tip
6	79.389	6	239	tip
6	79.512	6	240	tip
6	80.094	6	241	tip
6	80.769	6	242	tip
6	81.32	6	243	tip
6	81.443	6	244	tip
6	81.995	6	245	tip
6	82.209	6	246	tip
6	82.638	6	247	tip
6	82.884	6	248	tip
6	83.098	7	249	tip
6	83.497	7	250	tip
6	84.171	7	251	tip
6	84.263	7	252	tip
6	84.294	7	253	tip
6	84.661	7	254	tip
6	84.999	8	255	tip
6	85.52	8	256	tip
6	85.612	8	257	tip
6	86.102	8	258	tip
6	86.623	8	259	tip
6	86.807	8	260	tip
6	87.175	8	261	tip
6	87.635	8	262	tip
6	87.757	8	263	tip
6	88.064	8	264	tip
6	88.462	8	265	tip
6	88.554	8	266	tip
6	88.861	8	267	tip
6	88.891	8	268	tip
6	89.167	8	269	tip
6	89.229	8	270	tip
6	89.29	8	271	tip
6	89.229	8	272	tip
6	89.137	8	273	tip
6	88.953	8	274	tip
6	88.983	8	275	tip
6	89.014	8	276	tip
6	88.677	8	277	tip
6	88.524	8	278	tip
6	88.186	8	279	tip
6	87.512	8	280	tip
6	86.746	8	281	tip
6	85.581	8	282	tip
6	83.466	8	283	tip
6	80.462	8	284	tip
6	76.171	8	285	tip
6	69.335	8	286	tip
6	56.584	8	287	tip
7	56.155	6	157	tip
7	58.392	6	158	tip
7	60.201	6	159	tip
7	61.795	6	160	tip
7	62.622	6	161	tip
7	63.511	6	162	tip
7	64.155	6	163	tip
7	64.4	6	164	tip
7	64.676	6	165	tip
7	64.676	6	166	tip
7	64.124	6	167	tip
7	63.879	6	168	tip
7	63.634	6	169	tip
7	63.174	6	170	tip
7	63.082	6	171	tip
7	62.898	6	172	tip
7	62.868	6	173	tip
7	62.745	6	174	tip
7	62.592	6	175	tip
7	62.806	6	176	tip
7	63.174	6	177	tip
7	63.603	6	178	tip
7	64.063	6	179	tip
7	64.829	6	180	tip
7	65.626	6	181	tip
7	66.669	6	182	tip
7	67.772	6	183	tip
7	68.906	6	184	tip
7	69.764	6	185	tip
7	70.837	6	186	tip
7	72.002	6	187	tip
7	72.922	6	188	tip
7	73.902	6	189	tip
7	74.607	6	190	tip
7	75.251	6	191	tip
7	75.834	6	192	tip
7	75.925	6	193	tip
7	76.14	6	194	tip
7	76.232	6	195	tip
7	76.477	6	196	tip
7	76.355	6	197	tip
7	76.171	6	198	tip
7	75.925	6	199	tip
7	75.588	6	200	tip
7	74.975	6	201	tip
7	73.994	6	202	tip
7	73.105	5	203	tip
7	72.309	5	204	tip
7	71.481	5	205	tip
7	70.99	5	206	tip
7	70.715	5	207	tip
7	70.347	5	208	tip
7	70.194	5	209	tip
7	69.856	5	210	tip
7	69.703	5	211	tip
7	69.274	5	212	tip
7	68.722	5	213	tip
7	68.262	5	214	tip
7	67.833	5	215	tip
7	67.282	5	216	tip
7	66.914	5	217	tip
7	66.331	5	218	tip
7	65.749	5	219	tip
7	65.289	5	220	tip
7	65.075	5	221	tip
7	64.921	5	222	tip
7	64.462	5	223	tip
7	64.247	5	224	tip
7	64.063	5	225	tip
7	63.665	5	226	tip
7	63.327	5	227	tip
7	63.021	5	228	tip
7	62.776	5	229	tip
7	62.837	5	230	tip
7	62.806	5	231	tip
7	62.96	5	232	tip
7	63.205	5	233	tip
7	63.297	5	234	tip
7	63.419	5	235	tip
7	63.542	5	236	tip
7	63.511	5	237	tip
7	63.511	5	238	tip
7	63.45	5	239	tip
7	63.327	5	240	tip
7	63.573	5	241	tip
7	63.757	5	242	tip
7	63.91	5	243	tip
7	64.155	5	244	tip
7	64.4	5	245	tip
7	64.584	5	246	tip
7	64.86	5	247	tip
7	65.167	4	248	tip
7	65.32	4	249	tip
7	65.197	4	250	tip
7	65.105	4	251	tip
7	65.259	4	252	tip
7	65.044	4	253	tip
7	65.197	4	254	tip
7	65.473	4	255	tip
7	66.117	4	256	tip
7	66.914	4	257	tip
7	68.477	4	258	tip
7	69.458	4	259	tip
7	70.592	4	260	tip
7	71.634	4	261	tip
7	72.707	4	262	tip
7	73.504	4	263	tip
7	73.994	4	264	tip
7	74.27	4	265	tip
7	74.025	4	266	tip
7	73.627	4	267	tip
7	72.492	4	268	tip
7	71.266	4	269	tip
7	69.029	4	270	tip
7	65.872	4	271	tip
7	61.58	4	272	tip
7	54.5	4	273	tip
7	34.3	4	274	tip
8	16.246	5	169	tip
8	21.334	5	170	tip
8	25.411	5	171	tip
8	28.629	5	172	tip
8	31.541	5	173	tip
8	34.576	5	174	tip
8	37.273	5	175	tip
8	40.062	5	176	tip
8	42.882	5	177	tip
8	45.856	5	178	tip
8	49.166	5	179	tip
8	52.569	5	180	tip
8	56.185	5	181	tip
8	60.63	5	182	tip
8	64.523	5	183	tip
8	68.262	5	184	tip
8	72.002	5	185	tip
8	75.282	5	186	tip
8	78.654	5	187	tip
8	81.474	5	188	tip
8	84.079	5	189	tip
8	86.347	6	190	tip
8	87.635	6	191	tip
8	88.861	6	192	tip
8	89.995	6	193	tip
8	90.577	6	194	tip
8	91.313	6	195	tip
8	92.324	6	196	tip
8	93.06	6	197	tip
8	93.152	6	198	tip
8	93.367	6	199	tip
8	93.551	6	200	tip
8	93.826	6	201	tip
8	93.459	6	202	tip
8	93.091	6	203	tip
8	91.742	6	204	tip
8	90.914	6	205	tip
8	90.056	6	206	tip
8	88.707	6	207	tip
8	87.512	6	208	tip
8	85.857	6	209	tip
8	84.477	6	210	tip
8	82.792	6	211	tip
8	81.167	6	212	tip
8	79.757	6	213	tip
8	78.01	6	214	tip
8	76.201	6	215	tip
8	74.791	6	216	tip
8	73.014	6	217	tip
8	71.695	6	218	tip
8	69.764	6	219	tip
8	68.477	6	220	tip
8	67.159	6	221	tip
8	65.749	6	222	tip
8	64.768	6	223	tip
8	63.082	6	224	tip
8	61.58	6	225	tip
8	59.986	6	226	tip
8	57.749	5	227	tip
8	55.634	5	228	tip
8	53.09	5	229	tip
8	50.484	5	230	tip
8	48.032	4	231	tip
8	45.396	4	232	tip
8	42.729	4	233	tip
8	39.787	4	234	tip
8	36.997	4	235	tip
8	33.993	4	236	tip
8	30.53	4	237	tip
8	26.606	4	238	tip
8	22.07	4	239	tip
8	17.533	4	240	tip
8	12.2	4	241	tip
9	36.445	7	167	tip
9	37.089	7	168	tip
9	37.855	6	169	tip
9	38.499	6	170	tip
9	38.99	6	171	tip
9	39.388	6	172	tip
9	39.817	6	173	tip
9	40.093	6	174	tip
9	39.848	6	175	tip
9	39.879	6	176	tip
9	39.909	6	177	tip
9	39.633	6	178	tip
9	39.388	6	179	tip
9	39.204	6	180	tip
9	39.235	6	181	tip
9	39.327	6	182	tip
9	39.327	6	183	tip
9	39.664	6	184	tip
9	40.093	6	185	tip
9	40.246	6	186	tip
9	40.369	6	187	tip
9	41.013	6	188	tip
9	41.074	6	189	tip
9	41.258	6	190	tip
9	41.35	6	191	tip
9	41.503	6	192	tip
9	41.902	6	193	tip
9	42.116	6	194	tip
9	42.331	6	195	tip
9	42.453	6	196	tip
9	43.22	6	197	tip
9	43.863	6	198	tip
9	44.507	6	199	tip
9	45.335	6	200	tip
9	46.346	6	201	tip
9	47.48	6	202	tip
9	48.522	7	203	tip
9	50.024	7	204	tip
9	50.913	7	205	tip
9	52.017	7	206	tip
9	52.998	7	207	tip
9	54.193	7	208	tip
9	55.235	7	209	tip
9	56.308	7	210	tip
9	57.626	7	211	tip
9	58.944	7	212	tip
9	60.385	7	213	tip
9	61.825	7	214	tip
9	63.205	7	215	tip
9	64.4	7	216	tip
9	65.78	7	217	tip
9	66.883	7	218	tip
9	68.017	7	219	tip
9	69.335	7	220	tip
9	70.776	7	221	tip
9	72.094	7	222	tip
9	73.32	7	223	tip
9	74.638	7	224	tip
9	75.864	7	225	tip
9	77.152	7	226	tip
9	77.918	7	227	tip
9	78.715	7	228	tip
9	79.573	7	229	tip
9	79.91	7	230	tip
9	80.033	7	231	tip
9	79.941	7	232	tip
9	80.155	7	233	tip
9	80.064	7	234	tip
9	80.033	6	235	tip
9	80.064	6	236	tip
9	79.726	6	237	tip
9	79.634	6	238	tip
9	79.665	6	239	tip
9	79.175	6	240	tip
9	78.684	6	241	tip
9	78.194	6	242	tip
9	77.366	6	243	tip
9	76.937	6	244	tip
9	76.6	6	245	tip
9	76.508	6	246	tip
9	76.814	6	247	tip
9	76.968	6	248	tip
9	77.427	6	249	tip
9	77.887	6	250	tip
9	78.684	6	251	tip
9	79.205	6	252	tip
9	79.941	6	253	tip
9	80.37	6	254	tip
9	80.615	6	255	tip
9	81.228	6	256	tip
9	81.78	6	257	tip
9	81.995	6	258	tip
9	82.209	6	259	tip
9	82.546	6	260	tip
9	82.608	6	261	tip
9	82.792	6	262	tip
9	82.975	6	263	tip
9	82.975	6	264	tip
9	83.067	6	265	tip
9	83.067	6	266	tip
9	82.73	6	267	tip
9	82.209	6	268	tip
9	81.811	6	269	tip
9	81.259	6	270	tip
9	80.554	6	271	tip
9	79.788	6	272	tip
9	79.236	6	273	tip
9	78.347	6	274	tip
9	78.071	6	275	tip
9	78.194	6	276	tip
9	78.531	6	277	tip
9	78.96	6	278	tip
9	79.45	6	279	tip
9	79.696	6	280	tip
9	79.91	6	281	tip
9	80.278	6	282	tip
9	80.339	6	283	tip
9	80.738	6	284	tip
9	80.493	6	285	tip
9	80.431	6	286	tip
9	79.757	6	287	tip
9	78.592	6	288	tip
9	76.539	6	289	tip
9	73.044	6	290	tip
9	67.833	6	291	tip
9	57.841	6	292	tip
10	20.169	6	139	tip
10	41.442	6	140	tip
10	53.733	6	141	tip
10	55.48	6	142	tip
10	56.339	6	143	tip
10	57.228	6	144	tip
10	57.871	6	145	tip
10	57.81	6	146	tip
10	57.933	6	147	tip
10	57.504	6	148	tip
10	57.381	6	149	tip
10	56.768	6	150	tip
10	56.185	6	151	tip
10	55.511	6	152	tip
10	54.592	6	153	tip
10	53.917	6	154	tip
10	53.611	6	155	tip
10	53.274	6	156	tip
10	52.906	6	157	tip
10	52.906	6	158	tip
10	52.814	6	159	tip
10	52.783	6	160	tip
10	52.752	6	161	tip
10	52.875	6	162	tip
10	53.059	6	163	tip
10	53.151	6	164	tip
10	53.672	6	165	tip
10	54.5	6	166	tip
10	54.837	6	167	tip
10	55.358	6	168	tip
10	56.094	6	169	tip
10	57.228	6	170	tip
10	58.607	6	171	tip
10	59.956	6	172	tip
10	61.274	7	173	tip
10	62.5	7	174	tip
10	63.634	7	175	tip
10	64.891	7	176	tip
10	65.688	7	177	tip
10	66.76	7	178	tip
10	67.772	7	179	tip
10	68.661	7	180	tip
10	69.55	7	181	tip
10	70.469	7	182	tip
10	70.776	7	183	tip
10	70.99	7	184	tip
10	71.389	7	185	tip
10	71.634	7	186	tip
10	71.634	7	187	tip
10	71.91	7	188	tip
10	71.634	7	189	tip
10	71.757	7	190	tip
10	71.879	7	191	tip
10	71.971	7	192	tip
10	72.155	7	193	tip
10	72.646	7	194	tip
10	72.676	7	195	tip
10	72.738	7	196	tip
10	72.952	7	197	tip
10	72.922	7	198	tip
10	72.738	7	199	tip
10	72.891	7	200	tip
10	72.707	7	201	tip
10	72.4	7	202	tip
10	72.37	7	203	tip
10	72.125	7	204	tip
10	71.481	7	205	tip
10	71.542	7	206	tip
10	71.542	6	207	tip
10	71.481	6	208	tip
10	71.052	6	209	tip
10	71.021	6	210	tip
10	70.347	6	211	tip
10	69.979	6	212	tip
10	69.305	6	213	tip
10	68.845	6	214	tip
10	68.508	6	215	tip
10	68.446	6	216	tip
10	67.68	6	217	tip
10	67.098	6	218	tip
10	66.423	6	219	tip
10	65.902	6	220	tip
10	64.983	6	221	tip
10	64.155	6	222	tip
10	63.757	6	223	tip
10	62.745	6	224	tip
10	61.734	6	225	tip
10	61.366	6	226	tip
10	60.293	6	227	tip
10	59.588	6	228	tip
10	58.791	6	229	tip
10	58.546	6	230	tip
10	57.534	6	231	tip
10	56.921	6	232	tip
10	56.247	7	233	tip
10	55.756	7	234	tip
10	55.235	7	235	tip
10	54.714	7	236	tip
10	54.193	7	237	tip
10	53.856	7	238	tip
10	53.58	7	239	tip
10	53.028	7	240	tip
10	52.385	7	241	tip
10	52.385	7	242	tip
10	52.078	7	243	tip
10	51.312	7	244	tip
10	50.545	7	245	tip
10	50.086	7	246	tip
10	49.687	7	247	tip
10	49.289	6	248	tip
10	49.289	6	249	tip
10	48.982	6	250	tip
10	48.86	6	251	tip
10	48.952	6	252	tip
10	48.706	6	253	tip
10	48.676	6	254	tip
10	48.553	6	255	tip
10	48.553	6	256	tip
10	48.4	6	257	tip
10	48.645	6	258	tip
10	48.921	6	259	tip
10	49.074	6	260	tip
10	49.534	6	261	tip
10	49.932	6	262	tip
10	49.84	6	263	tip
10	49.932	6	264	tip
10	50.147	6	265	tip
10	49.84	6	266	tip
10	49.442	6	267	tip
10	48.768	6	268	tip
10	47.971	6	269	tip
11	34.361	5	165	tip
11	36.231	5	166	tip
11	36.844	5	167	tip
11	36.936	5	168	tip
11	37.12	5	169	tip
11	36.936	5	170	tip
11	36.599	5	171	tip
11	36.047	5	172	tip
11	35.74	5	173	tip
11	35.311	5	174	tip
11	34.882	5	175	tip
11	34.361	5	176	tip
11	33.993	5	177	tip
11	33.564	5	178	tip
11	33.38	5	179	tip
11	33.227	5	180	tip
11	32.982	5	181	tip
11	32.767	5	182	tip
11	32.798	5	183	tip
11	32.92	5	184	tip
11	32.829	5	185	tip
11	32.951	5	186	tip
11	33.104	5	187	tip
11	33.442	5	188	tip
11	33.809	5	189	tip
11	34.116	5	190	tip
11	34.606	5	191	tip
11	35.097	5	192	tip
11	35.403	5	193	tip
11	35.74	5	194	tip
11	36.292	5	195	tip
11	36.813	5	196	tip
11	37.457	5	197	tip
11	37.917	5	198	tip
11	38.806	5	199	tip
11	39.511	5	200	tip
11	40.093	5	201	tip
11	40.43	5	202	tip
11	40.737	5	203	tip
11	40.767	5	204	tip
11	40.921	5	205	tip
11	40.951	5	206	tip
11	40.798	5	207	tip
11	40.4	5	208	tip
11	40.185	5	209	tip
11	40.124	5	210	tip
11	39.879	5	211	tip
11	39.756	5	212	tip
11	39.664	5	213	tip
11	39.787	5	214	tip
11	40.277	5	215	tip
11	40.614	5	216	tip
11	40.798	5	217	tip
11	41.35	5	218	tip
11	41.963	5	219	tip
11	42.453	5	220	tip
11	43.312	5	221	tip
11	43.986	5	222	tip
11	44.66	5	223	tip
11	46.04	5	224	tip
11	46.714	5	225	tip
11	47.664	5	226	tip
11	48.86	5	227	tip
11	49.687	5	228	tip
11	50.76	5	229	tip
11	51.649	5	230	tip
11	52.507	5	231	tip
11	53.488	5	232	tip
11	54.101	5	233	tip
11	55.45	5	234	tip
11	56.063	5	235	tip
11	56.799	5	236	tip
11	57.779	5	237	tip
11	58.822	5	238	tip
11	59.527	5	239	tip
11	60.753	5	240	tip
11	61.642	5	241	tip
11	62.806	5	242	tip
11	63.94	5	243	tip
11	64.921	5	244	tip
11	66.27	5	245	tip
11	67.557	5	246	tip
11	68.354	5	247	tip
11	69.856	5	248	tip
11	70.776	5	249	tip
11	71.634	5	250	tip
11	72.86	5	251	tip
11	73.627	5	252	tip
11	74.546	5	253	tip
11	75.925	5	254	tip
11	76.814	5	255	tip
11	77.795	5	256	tip
11	79.052	5	257	tip
11	80.002	5	258	tip
11	81.167	5	259	tip
11	82.117	5	260	tip
11	83.343	5	261	tip
11	84.386	5	262	tip
11	85.397	5	263	tip
11	86.807	5	264	tip
11	87.972	5	265	tip
11	89.29	5	266	tip
11	90.639	5	267	tip
11	91.619	5	268	tip
11	93.183	5	269	tip
11	93.949	5	270	tip
11	95.451	5	271	tip
11	96.524	5	272	tip
11	97.689	5	273	tip
11	98.608	5	274	tip
11	99.957	5	275	tip
11	100.57	5	276	tip
11	101.581	5	277	tip
11	102.256	5	278	tip
11	103.083	5	279	tip
11	103.39	5	280	tip
11	103.696	5	281	tip
11	103.85	5	282	tip
11	103.972	5	283	tip
11	103.911	5	284	tip
11	103.635	5	285	tip
11	103.635	5	286	tip
11	102.961	5	287	tip
11	102.164	5	288	tip
11	101.06	5	289	tip
11	99.804	5	290	tip
11	97.842	5	291	tip
11	95.788	5	292	tip
11	93.734	5	293	tip
11	91.374	5	294	tip
11	88.37	5	295	tip
12	15.694	5	159	tip
12	15.694	5	160	tip
12	22.805	5	161	tip
12	22.805	5	162	tip
12	28.077	5	163	tip
12	28.077	5	164	tip
12	31.756	5	165	tip
12	31.756	5	166	tip
12	35.311	5	167	tip
12	35.311	5	168	tip
12	37.886	5	169	tip
12	37.886	5	170	tip
12	39.848	5	171	tip
12	39.848	5	172	tip
12	41.932	5	173	tip
12	41.932	5	174	tip
12	43.404	5	175	tip
12	43.404	5	176	tip
12	44.63	5	177	tip
12	44.63	5	178	tip
12	45.856	5	179	tip
12	45.856	5	180	tip
12	46.837	5	181	tip
12	46.837	5	182	tip
12	46.714	5	183	tip
12	46.714	5	184	tip
12	46.959	5	185	tip
12	46.959	5	186	tip
12	47.082	5	187	tip
12	47.082	5	188	tip
12	47.45	5	189	tip
12	47.45	5	190	tip
12	47.817	5	191	tip
12	47.817	5	192	tip
12	48.185	5	193	tip
12	48.185	5	194	tip
12	48.676	5	195	tip
12	48.676	5	196	tip
12	49.411	5	197	tip
12	49.411	5	198	tip
12	49.779	5	199	tip
12	49.779	5	200	tip
12	50.024	5	201	tip
12	50.024	5	202	tip
12	51.128	5	203	tip
12	51.128	5	204	tip
12	51.496	5	205	tip
12	51.496	5	206	tip
12	52.599	5	207	tip
12	52.599	5	208	tip
12	53.09	5	209	tip
12	53.09	5	210	tip
12	53.703	5	211	tip
12	53.703	6	212	tip
12	54.561	6	213	tip
12	54.561	6	214	tip
12	54.929	6	215	tip
12	54.929	6	216	tip
12	54.806	6	217	tip
12	54.806	6	218	tip
12	55.051	6	219	tip
12	55.051	6	220	tip
12	54.684	6	221	tip
12	54.684	6	222	tip
12	54.806	6	223	tip
12	54.806	6	224	tip
12	55.174	6	225	tip
12	55.174	6	226	tip
12	55.419	6	227	tip
12	55.419	6	228	tip
12	55.664	6	229	tip
12	55.664	6	230	tip
12	54.806	6	231	tip
12	54.806	6	232	tip
12	55.051	6	233	tip
12	55.051	6	234	tip
12	55.174	6	235	tip
12	55.174	6	236	tip
12	54.193	6	237	tip
12	54.193	6	238	tip
12	53.825	6	239	tip
12	53.825	6	240	tip
12	53.457	6	241	tip
12	53.457	6	242	tip
12	53.335	6	243	tip
12	53.335	6	244	tip
12	52.722	6	245	tip
12	52.722	6	246	tip
12	52.477	6	247	tip
12	52.477	6	248	tip
12	51.864	6	249	tip
12	51.864	6	250	tip
12	51.128	6	251	tip
12	51.128	6	252	tip
12	50.27	6	253	tip
12	50.27	6	254	tip
12	49.289	6	255	tip
12	49.289	6	256	tip
12	48.921	6	257	tip
12	48.921	6	258	tip
12	47.572	6	259	tip
12	47.572	6	260	tip
12	45.733	6	261	tip
12	45.733	6	262	tip
12	43.649	6	263	tip
12	43.649	6	264	tip
12	42.3	6	265	tip
12	42.3	6	266	tip
12	40.093	6	267	tip
12	40.093	6	268	tip
12	37.273	6	269	tip
12	37.273	6	270	tip
12	33.595	6	271	tip
12	33.595	6	272	tip
12	28.323	6	273	tip
12	28.323	6	274	tip
13	11.188	6	178	tip
13	14.315	6	179	tip
13	15.633	6	180	tip
13	16.092	6	181	tip
13	16.154	6	182	tip
13	15.908	6	183	tip
13	15.725	6	184	tip
13	15.418	6	185	tip
13	15.112	6	186	tip
13	14.958	6	187	tip
13	14.897	6	188	tip
13	14.744	6	189	tip
13	14.437	6	190	tip
13	14.284	6	191	tip
13	14.345	6	192	tip
13	14.682	6	193	tip
13	14.498	6	194	tip
13	14.774	6	195	tip
13	14.713	6	196	tip
13	14.897	6	197	tip
13	15.05	6	198	tip
13	15.295	6	199	tip
13	15.387	6	200	tip
13	15.725	6	201	tip
13	16	6	202	tip
13	16.43	6	203	tip
13	16.675	6	204	tip
13	17.41	6	205	tip
13	17.686	6	206	tip
13	18.391	6	207	tip
13	19.127	6	208	tip
13	19.648	6	209	tip
13	20.384	6	210	tip
13	20.752	6	211	tip
13	21.395	6	212	tip
13	21.395	6	213	tip
13	21.242	6	214	tip
13	21.242	6	215	tip
13	21.61	6	216	tip
13	22.039	6	217	tip
13	22.744	6	218	tip
13	23.572	6	219	tip
13	24.798	6	220	tip
13	25.962	6	221	tip
13	27.097	6	222	tip
13	28.353	6	223	tip
13	29.702	6	224	tip
13	30.897	6	225	tip
13	31.848	6	226	tip
13	32.338	6	227	tip
13	33.012	6	228	tip
13	33.748	6	229	tip
13	34.269	6	230	tip
13	34.882	6	231	tip
13	35.649	6	232	tip
13	36.752	6	233	tip
13	37.702	6	234	tip
13	38.652	6	235	tip
13	39.848	5	236	tip
13	40.706	5	237	tip
13	41.932	5	238	tip
13	42.821	5	239	tip
13	43.771	5	240	tip
13	44.538	5	241	tip
13	44.997	5	242	tip
13	45.396	4	243	tip
13	46.285	4	244	tip
13	47.235	4	245	tip
13	48.093	4	246	tip
13	49.534	4	247	tip
13	50.607	4	248	tip
13	51.159	4	249	tip
13	51.588	4	250	tip
13	51.71	4	251	tip
13	51.894	4	252	tip
13	52.262	4	253	tip
13	52.507	4	254	tip
13	52.967	4	255	tip
13	52.967	4	256	tip
13	52.936	4	257	tip
13	52.967	4	258	tip
13	53.212	4	259	tip
13	53.365	4	260	tip
13	53.58	4	261	tip
13	53.764	4	262	tip
13	53.887	4	263	tip
13	53.764	4	264	tip
13	54.07	4	265	tip
13	54.193	4	266	tip
13	54.193	4	267	tip
13	54.346	4	268	tip
13	54.408	4	269	tip
13	54.408	4	270	tip
13	54.469	4	271	tip
13	54.5	4	272	tip
13	54.837	4	273	tip
13	54.775	4	274	tip
13	54.775	4	275	tip
13	54.377	4	276	tip
13	54.377	4	277	tip
13	54.377	4	278	tip
13	54.04	4	279	tip
13	53.825	4	280	tip
13	54.009	4	281	tip
13	54.101	4	282	tip
13	53.672	4	283	tip
13	53.549	4	284	tip
13	53.672	4	285	tip
13	53.703	4	286	tip
13	53.703	4	287	tip
13	53.58	4	288	tip
13	53.764	4	289	tip
13	53.856	4	290	tip
13	53.549	4	291	tip
13	52.783	4	292	tip
13	52.201	4	293	tip
13	51.772	4	294	tip
13	51.618	4	295	tip
13	51.649	4	296	tip
13	51.833	4	297	tip
13	52.047	4	298	tip
13	52.844	4	299	tip
14	32.645	8	155	tip
14	37.488	8	156	tip
14	39.327	8	157	tip
14	40.185	8	158	tip
14	40.767	8	159	tip
14	41.013	8	160	tip
14	40.951	8	161	tip
14	41.135	8	162	tip
14	41.074	8	163	tip
14	40.737	8	164	tip
14	40.369	8	165	tip
14	39.879	7	166	tip
14	39.327	7	167	tip
14	38.499	7	168	tip
14	37.886	6	169	tip
14	37.549	6	170	tip
14	37.304	6	171	tip
14	37.212	6	172	tip
14	36.997	6	173	tip
14	37.12	6	174	tip
14	37.181	6	175	tip
14	37.181	6	176	tip
14	37.365	6	177	tip
14	37.396	6	178	tip
14	37.334	6	179	tip
14	37.488	6	180	tip
14	37.181	6	181	tip
14	36.783	5	182	tip
14	36.476	5	183	tip
14	35.986	5	184	tip
14	35.587	5	185	tip
14	35.127	5	186	tip
14	34.698	5	187	tip
14	34.3	5	188	tip
14	34.024	5	189	tip
14	33.717	5	190	tip
14	33.534	5	191	tip
14	33.258	5	192	tip
14	33.104	5	193	tip
14	33.258	5	194	tip
14	33.135	5	195	tip
14	33.104	5	196	tip
14	33.503	5	197	tip
14	33.809	5	198	tip
14	34.33	5	199	tip
14	34.637	5	200	tip
14	35.219	5	201	tip
14	35.802	5	202	tip
14	36.415	5	203	tip
14	37.304	6	204	tip
14	37.641	6	205	tip
14	38.407	6	206	tip
14	38.744	6	207	tip
14	39.051	6	208	tip
14	39.388	6	209	tip
14	39.603	6	210	tip
14	39.756	6	211	tip
14	40.154	6	212	tip
14	40.461	6	213	tip
14	40.859	6	214	tip
14	41.35	6	215	tip
14	41.963	6	216	tip
14	43.005	6	217	tip
14	44.231	6	218	tip
14	45.488	6	219	tip
14	46.561	6	220	tip
14	47.756	6	221	tip
14	49.013	6	222	tip
14	50.454	6	223	tip
14	51.496	6	224	tip
14	52.814	6	225	tip
14	54.009	6	226	tip
14	55.143	6	227	tip
14	56.461	6	228	tip
14	57.687	6	229	tip
14	58.73	6	230	tip
14	60.262	7	231	tip
14	62.469	7	232	tip
14	65.902	7	233	tip
14	70.132	7	234	tip
14	73.136	7	235	tip
14	74.791	7	236	tip
14	75.834	7	237	tip
14	76.539	7	238	tip
14	77.734	7	239	tip
14	78.562	7	240	tip
14	79.267	7	241	tip
14	80.431	7	242	tip
14	81.565	7	243	tip
14	82.73	7	244	tip
14	84.477	7	245	tip
14	85.918	7	246	tip
14	87.083	7	247	tip
14	88.094	7	248	tip
14	89.075	7	249	tip
14	89.535	7	250	tip
14	89.504	7	251	tip
14	89.29	7	252	tip
14	88.554	7	253	tip
14	88.217	7	254	tip
14	87.88	7	255	tip
14	87.451	7	256	tip
14	86.93	7	257	tip
14	86.409	7	258	tip
14	85.826	7	259	tip
14	85.182	7	260	tip
14	84.477	7	261	tip
14	83.251	7	262	tip
14	82.24	7	263	tip
14	81.075	7	264	tip
14	79.849	7	265	tip
14	78.071	7	266	tip
14	76.355	7	267	tip
14	74.27	7	268	tip
14	72.309	7	269	tip
14	70.592	7	270	tip
14	69.274	7	271	tip
14	68.232	7	272	tip
14	66.852	7	273	tip
14	65.688	7	274	tip
14	64.002	7	275	tip
14	61.672	7	276	tip
14	58.822	7	277	tip
14	55.327	7	278	tip
14	52.507	7	279	tip
14	49.779	7	280	tip
14	47.082	7	281	tip
14	44.262	7	282	tip
14	40.89	7	283	tip
14	37.641	7	284	tip
14	34.637	7	285	tip
15	33.901	6	165	tip
15	34.147	6	166	tip
15	34.361	6	167	tip
15	34.177	6	168	tip
15	33.932	6	169	tip
15	33.595	6	170	tip
15	32.737	6	171	tip
15	32.307	6	172	tip
15	31.327	6	173	tip
15	30.468	6	174	tip
15	29.947	6	175	tip
15	29.457	6	176	tip
15	28.936	5	177	tip
15	28.629	5	178	tip
15	28.323	5	179	tip
15	28.261	5	180	tip
15	27.985	5	181	tip
15	28.047	5	182	tip
15	27.985	5	183	tip
15	28.169	5	184	tip
15	28.139	5	185	tip
15	28.261	5	186	tip
15	28.231	5	187	tip
15	28.323	5	188	tip
15	28.231	5	189	tip
15	28.415	5	190	tip
15	28.384	5	191	tip
15	28.568	5	192	tip
15	28.69	5	193	tip
15	28.813	5	194	tip
15	28.782	5	195	tip
15	28.752	5	196	tip
15	28.384	5	197	tip
15	27.924	5	198	tip
15	27.342	5	199	tip
15	27.188	5	200	tip
15	26.698	5	201	tip
15	26.269	5	202	tip
15	26.085	5	203	tip
15	25.748	5	204	tip
15	25.564	5	205	tip
15	25.319	5	206	tip
15	25.227	5	207	tip
15	25.073	5	208	tip
15	24.951	5	209	tip
15	24.828	5	210	tip
15	24.736	5	211	tip
15	24.614	5	212	tip
15	24.46	5	213	tip
15	24.644	5	214	tip
15	24.706	5	215	tip
15	24.614	5	216	tip
15	24.675	5	217	tip
15	24.798	5	218	tip
15	24.828	5	219	tip
15	25.073	5	220	tip
15	25.227	5	221	tip
15	25.288	5	222	tip
15	25.687	5	223	tip
15	25.748	5	224	tip
15	26.146	5	225	tip
15	26.453	5	226	tip
15	26.882	5	227	tip
15	27.526	5	228	tip
15	27.863	5	229	tip
15	28.384	5	230	tip
15	28.721	5	231	tip
15	29.212	5	232	tip
15	29.794	5	233	tip
15	30.315	5	234	tip
15	30.683	5	235	tip
15	31.173	5	236	tip
15	32.062	5	237	tip
15	33.012	5	238	tip
15	34.024	5	239	tip
15	35.311	5	240	tip
15	36.445	5	241	tip
15	37.917	5	242	tip
15	39.449	5	243	tip
15	40.859	5	244	tip
15	42.515	5	245	tip
15	43.925	5	246	tip
15	45.273	5	247	tip
15	46.561	5	248	tip
15	47.695	5	249	tip
15	48.369	5	250	tip
15	49.197	5	251	tip
15	49.565	5	252	tip
15	50.576	5	253	tip
15	51.373	5	254	tip
15	52.17	5	255	tip
15	52.936	5	256	tip
15	53.795	5	257	tip
15	54.684	5	258	tip
15	55.542	5	259	tip
15	56.339	5	260	tip
15	57.718	5	261	tip
15	58.454	5	262	tip
15	59.435	5	263	tip
15	60.446	5	264	tip
15	61.12	5	265	tip
15	61.55	5	266	tip
15	62.439	5	267	tip
15	62.898	5	268	tip
15	64.186	5	269	tip
15	64.983	5	270	tip
15	65.841	5	271	tip
15	66.944	5	272	tip
15	67.557	5	273	tip
15	68.784	5	274	tip
15	69.58	5	275	tip
15	70.715	5	276	tip
15	71.695	5	277	tip
15	72.492	5	278	tip
15	73.259	5	279	tip
15	74.178	5	280	tip
15	74.73	5	281	tip
15	75.251	5	282	tip
15	75.925	5	283	tip
15	76.508	5	284	tip
15	76.968	5	285	tip
15	77.611	5	286	tip
15	78.255	5	287	tip
15	78.96	5	288	tip
15	79.665	5	289	tip
15	80.064	5	290	tip
15	80.431	5	291	tip
15	80.891	5	292	tip
15	81.32	5	293	tip
15	81.014	5	294	tip
15	80.462	5	295	tip
16	15.663	6	171	tip
16	17.441	6	172	tip
16	18.851	6	173	tip
16	20.261	6	174	tip
16	21.119	6	175	tip
16	21.702	6	176	tip
16	21.916	7	177	tip
16	21.824	7	178	tip
16	21.732	7	179	tip
16	21.457	7	180	tip
16	20.997	6	181	tip
16	20.445	6	182	tip
16	19.679	6	183	tip
16	18.82	6	184	tip
16	18.115	6	185	tip
16	17.441	5	186	tip
16	16.828	5	187	tip
16	16.491	5	188	tip
16	15.847	4	189	tip
16	15.541	4	190	tip
16	15.234	4	191	tip
16	14.836	4	192	tip
16	14.529	4	193	tip
16	14.069	4	194	tip
16	13.64	4	195	tip
16	13.303	4	196	tip
16	12.751	4	197	tip
16	12.659	4	198	tip
16	12.445	4	199	tip
16	12.169	4	200	tip
16	12.016	4	201	tip
16	11.862	4	202	tip
16	11.587	4	203	tip
16	11.464	4	204	tip
16	11.464	4	205	tip
16	11.587	4	206	tip
16	11.341	4	207	tip
16	11.464	4	208	tip
16	11.403	4	209	tip
16	11.495	4	210	tip
16	11.403	4	211	tip
16	11.311	4	212	tip
16	11.188	4	213	tip
16	11.035	4	214	tip
16	10.912	4	215	tip
16	10.728	4	216	tip
16	10.636	4	217	tip
16	10.483	4	218	tip
16	10.391	4	219	tip
16	10.422	4	220	tip
16	10.514	4	221	tip
16	10.759	4	222	tip
16	10.973	4	223	tip
16	11.188	4	224	tip
16	11.403	4	225	tip
16	11.77	4	226	tip
16	11.893	4	227	tip
16	12.23	4	228	tip
16	12.506	4	229	tip
16	12.659	4	230	tip
16	12.475	4	231	tip
16	12.782	4	232	tip
16	12.659	4	233	tip
16	12.935	4	234	tip
16	12.935	4	235	tip
16	13.334	4	236	tip
16	13.671	4	237	tip
16	13.855	4	238	tip
16	14.315	4	239	tip
16	14.59	5	240	tip
16	15.479	5	241	tip
16	16.092	5	242	tip
16	17.349	5	243	tip
16	18.79	5	244	tip
16	20.077	5	245	tip
16	21.64	5	246	tip
16	23.265	5	247	tip
16	24.675	5	248	tip
16	25.993	5	249	tip
16	27.28	6	250	tip
16	28.169	6	251	tip
16	29.242	6	252	tip
16	30.652	6	253	tip
16	32.032	6	254	tip
16	33.288	7	255	tip
16	35.035	7	256	tip
16	36.445	7	257	tip
16	37.825	7	258	tip
16	39.174	7	259	tip
16	40.093	7	260	tip
16	40.859	7	261	tip
16	41.626	7	262	tip
16	42.852	7	263	tip
16	43.649	7	264	tip
16	44.599	7	265	tip
16	45.794	7	266	tip
16	46.837	7	267	tip
16	48.032	7	268	tip
16	48.952	7	269	tip
16	49.994	7	270	tip
16	50.729	7	271	tip
16	51.557	8	272	tip
16	52.66	8	273	tip
16	53.212	8	274	tip
16	54.162	8	275	tip
16	54.53	8	276	tip
16	55.266	8	277	tip
16	55.818	8	278	tip
16	56.645	8	279	tip
16	57.473	8	280	tip
16	58.3	8	281	tip
16	59.067	8	282	tip
16	59.802	8	283	tip
16	60.232	8	284	tip
16	60.63	8	285	tip
16	61.029	8	286	tip
16	61.304	8	287	tip
16	61.917	8	288	tip
16	62.071	8	289	tip
16	62.5	8	290	tip
16	62.898	8	291	tip
16	63.082	8	292	tip
16	63.634	8	293	tip
16	63.971	8	294	tip
16	64.216	8	295	tip
16	64.37	8	296	tip
16	64.278	8	297	tip
16	63.971	8	298	tip
16	62.898	8	299	tip
16	61.458	8	300	tip
16	59.496	8	301	tip
17	47.542	6	157	tip
17	48.768	6	158	tip
17	51.864	6	159	tip
17	55.389	6	160	tip
17	57.228	6	161	tip
17	58.699	6	162	tip
17	60.569	6	163	tip
17	62.439	6	164	tip
17	64.063	6	165	tip
17	66.423	6	166	tip
17	68.293	7	167	tip
17	70.285	7	168	tip
17	72.125	7	169	tip
17	72.707	7	170	tip
17	73.443	7	171	tip
17	75.466	7	172	tip
17	77.765	7	173	tip
17	79.849	7	174	tip
17	81.657	7	175	tip
17	84.048	7	176	tip
17	86.133	7	177	tip
17	88.677	7	178	tip
17	90.976	7	179	tip
17	91.895	7	180	tip
17	92.141	7	181	tip
17	92.815	7	182	tip
17	93.918	7	183	tip
17	95.328	7	184	tip
17	96.83	7	185	tip
17	98.608	7	186	tip
17	100.049	7	187	tip
17	101.306	7	188	tip
17	102.194	7	189	tip
17	102.685	7	190	tip
17	102.777	7	191	tip
17	102.685	7	192	tip
17	102.716	7	193	tip
17	102.593	7	194	tip
17	102.746	7	195	tip
17	102.716	7	196	tip
17	102.869	7	197	tip
17	102.991	7	198	tip
17	103.083	7	199	tip
17	103.053	7	200	tip
17	102.654	7	201	tip
17	101.919	7	202	tip
17	101.428	7	203	tip
17	100.57	7	204	tip
17	99.62	7	205	tip
17	99.007	7	206	tip
17	98.394	7	207	tip
17	97.781	7	208	tip
17	97.106	7	209	tip
17	96.984	7	210	tip
17	96.309	7	211	tip
17	94.777	7	212	tip
17	92.508	7	213	tip
17	90.148	7	214	tip
17	87.788	7	215	tip
17	85.581	7	216	tip
17	83.435	7	217	tip
17	81.443	7	218	tip
17	79.757	7	219	tip
17	79.144	7	220	tip
17	78.224	7	221	tip
17	76.263	7	222	tip
17	73.872	7	223	tip
17	71.266	7	224	tip
17	69.029	7	225	tip
17	66.699	7	226	tip
17	64.645	7	227	tip
17	62.408	7	228	tip
17	60.691	7	229	tip
17	59.894	7	230	tip
17	58.852	7	231	tip
17	56.952	7	232	tip
17	54.561	7	233	tip
17	52.139	7	234	tip
17	49.779	7	235	tip
17	47.542	7	236	tip
17	45.304	7	237	tip
17	43.066	7	238	tip
17	41.472	7	239	tip
17	40.921	7	240	tip
17	40.584	7	241	tip
17	39.756	7	242	tip
17	38.56	7	243	tip
17	37.702	7	244	tip
17	36.476	6	245	tip
17	35.495	6	246	tip
17	34.606	6	247	tip
17	33.503	6	248	tip
17	32.92	6	249	tip
17	32.553	6	250	tip
17	32.246	6	251	tip
17	31.388	6	252	tip
17	30.131	6	253	tip
17	28.874	6	254	tip
17	27.71	6	255	tip
17	26.851	6	256	tip
17	25.625	6	257	tip
17	24.736	6	258	tip
17	23.939	6	259	tip
17	23.572	6	260	tip
17	23.51	6	261	tip
17	23.296	6	262	tip
17	22.621	6	263	tip
17	22.284	6	264	tip
17	21.702	6	265	tip
[truncated: 16,197 more rows]
