# Supplementary material for: 3D cell neighbour dynamics in growing pseudostratified epithelia
Source: eLife. 2021 Oct 5;10:e68135. doi: 10.7554/eLife.68135 (PMC8570695; doi:10.7554/eLife.68135)
Supplement: Figure 3—source data 2. [file elife-68135-fig3-data2.xls]

## Sheet: Sheet1
R2_R1_ratio	n	rel_pos
1.2258	3	0.44792
1.1109	3	0.46667
1.1755	3	0.55102
1.0536	3	0.29412
1.3556	3	0.58242
1.2065	3	0.6
1.3422	3	0.54688
1.0251	3	0.40816
1.0988	3	0.092593
1.1622	3	0.016129
1.097	3	0.67
1.0428	3	0.18519
1.0794	3	0.5098
1.1021	4	0.92453
1.1622	4	0.83333
1.1729	4	0.12727
1.1892	4	0.042857
1.1303	4	0.58929
1.1883	4	0.018519
1.1081	4	0.061404
1.6734	4	0.7807
1.0616	4	0.19811
1.5648	4	0.59434
1.0552	4	0.20833
1.1498	4	0.54167
1.0426	4	0.053571
1.2074	4	0.74107
1.0633	4	0.7
1.0068	4	0.47959
1.2409	4	0.62245
1.0269	4	0.67647
1.1251	4	0.77778
1.2628	4	0.60526
1.164	4	0.72807
1.3216	4	0.75714
1.0429	4	0.44118
1.2601	4	0.97059
1.0089	4	0.38462
1.2035	4	0.41758
1.028	4	0.72527
1.1636	4	0.16522
1.2778	4	0.16667
1.0305	4	0.75926
1.2062	4	0.85417
1.3109	4	0.090909
1.234	4	0.44545
1.1202	4	0.96939
1.0181	4	0.63636
1.3457	4	0.38182
1.3014	4	0.6
1.1672	4	0.31818
1.0159	4	0.12
1.0949	4	0.45312
1.0331	4	0.73438
1.0084	4	0.57018
1.0908	4	0.66327
1.1536	4	0.45455
1.1993	4	0.90476
1.1939	4	0.68627
1.0234	4	0.26471
1.1451	4	0.57143
1.0645	4	0.089286
1.1635	4	0.27679
1.063	4	0.60714
1.0522	4	0.02439
1.1164	4	0.7439
1.5261	4	0.58824
1.0972	4	0.28696
1.1706	4	0.11111
1.1398	4	0.21296
1.2411	4	0.75
1.036	4	0.16667
1.0296	4	0.73333
1.0601	4	0.35484
1.285	4	0.080645
1.2128	4	0.43
1.1321	4	0.14286
1.2062	4	0.55102
1.1346	4	0.51852
1.4544	4	0.17143
1.3267	4	0.28302
1.2656	4	0.96226
1.0137	4	0.27778
1.2493	4	0.84314
1.4189	4	0.32
1.1573	4	0.60784
1.0943	4	0.84
1.0729	4	0.92
1.0403	5	0.17308
1.0689	5	0.34615
1.05	5	0.66667
1.2143	5	0.95833
1.0781	5	0.072727
1.0427	5	0.2
1.6766	5	0.46364
1.0914	5	0.73636
1.036	5	0.9
1.0232	5	0.61429
1.3482	5	0.88571
1.1864	5	0.40179
1.104	5	0.61607
1.2683	5	0.37963
1.1784	5	0.40741
1.0562	5	0.48148
1.118	5	0.93519
1.0733	5	0.21053
1.2119	5	0.057692
1.4092	5	0.51754
1.0953	5	0.046512
1.0727	5	0.25581
1.0781	5	0.27907
1.0652	5	0.13208
1.0218	5	0.54717
1.4605	5	0.72222
1.0315	5	0.51
1.0906	5	0.64
1.0761	5	0.76
1.0278	5	0.96
1.0517	5	0.5
1.1069	5	0.93396
0.99886	5	0.17708
1.0673	5	0.25532
1.0071	5	0.62903
1.5234	5	0.089286
1.0842	5	0.05102
1.012	5	0.33673
1.0325	5	0.66327
1.0889	5	0.96939
1.3662	5	0.875
1.1581	5	0.29412
1.1721	5	0.60294
1.1191	5	0.85294
1.076	5	0.39683
1.1525	5	0.65079
1.1377	5	0.7619
1.1384	5	0.79365
1.1315	5	0.11404
1.0383	5	0.53509
1.1254	5	0.92982
1.5355	5	0.11111
1.0917	5	0.2037
1.2162	5	0.7037
1.0342	5	0.4
1.1929	5	0.71569
1.2156	5	0.34247
1.0471	5	0.57534
1.1513	5	0.17308
1.0543	5	0.57692
1.0479	5	0.11538
1.0347	5	0.70192
1.0424	5	0.9469
1.0108	5	0.82418
1.0875	5	0.6087
1.1073	5	0.47475
1.2982	5	1
1.0239	5	0.12963
1.2789	5	0.44444
1.0154	5	0.5463
1.0446	5	0.91667
1.0832	5	0.65625
1.5868	5	0.79167
1.0902	5	0.16522
1.0767	5	0.36522
1.0207	5	0.93043
1.1334	5	0.29091
1.0428	5	0.66364
1.3529	5	0.21429
1.0607	5	0.92857
1.2432	5	0.072727
1.042	5	0.33636
1.1797	5	0.76364
1.1563	5	0.11818
1.0243	5	0.91818
1.0198	5	0.38636
1.0162	5	0.61364
1.116	5	0.26562
1.0161	5	0.43902
1.0615	5	0.079545
1.2683	5	0.52273
1.1937	5	0.5283
1.0104	5	0.33333
1.0185	5	0.026316
1.0084	5	0.48246
1.0613	5	0.71429
1.0128	5	0.083333
1.0012	5	0.35849
1.2744	5	0.87736
1.3387	5	0.27027
1.0492	5	0.034091
1.1664	5	0.23864
1.339	5	0.2381
1.0564	5	0.65714
1.0363	5	0.10784
1.1	5	0.31373
1.0368	5	0.66667
1.1095	5	0.16279
1.0762	5	0.76829
1.1641	5	0.92683
1.0052	5	0.68627
1.1202	5	0.11905
1.3651	5	0.28571
1.1851	5	0.78571
1.1185	5	0.071429
1.0814	5	0.24107
1.1139	5	0.25893
1.0565	5	0.33036
1.1033	5	0.47321
1.0287	5	0.50893
1.0762	5	0.67857
1.3063	5	0.88393
1.0549	5	0.5125
1.0844	5	0.2439
1.3141	5	0.4878
1.0567	5	0.72881
1.1509	5	0.073529
1.0824	5	0.44118
1.0694	5	0.76471
1.0849	5	0.32174
1.1072	5	0.14474
1.2529	5	0.40789
1.2588	5	0.81579
1.0491	5	0.43056
1.0424	5	0.83333
1.19	5	0.58333
1.038	5	0.11111
1.1037	5	0.5873
1.1282	5	0.82051
1.2815	5	0.36111
1.0199	5	0.78704
1.0285	5	0.25
1.1756	5	0.24242
1.1347	5	0.92424
1.0241	5	1
1.0938	5	0.63333
1.0385	5	0.46774
1.1417	5	0.625
1.1153	5	0.8625
1.0221	5	0.44
1.2253	5	0.99
1.3793	5	0.77551
1.0442	5	0.08
1.0395	5	0.4
1.0388	5	0.10204
1.1264	5	0.36735
1.0409	5	0.83673
1.0868	5	0.72917
1.0089	5	0.79167
1.0205	5	0.71429
1.1535	5	0.74074
1.2558	5	0.057143
1.0744	5	0.22857
1.096	5	0.30769
1.0588	5	0.11321
1.0356	5	0.79245
1.1679	5	0.78431
1.1055	5	0.88235
1.1794	5	0.74194
1.0806	5	0.16
1.0877	5	0.64
1.0561	5	0.17647
1.3071	5	0.45098
1.1706	5	0.70588
1.2636	5	0.68
1.358	5	0.10714
1.3276	5	0.18182
1.1027	5	0.5
1.0266	6	0.88679
1.0399	6	0.26923
1.1048	6	0.67308
1.0916	6	0.58333
1.0707	6	0.13393
1.0924	6	0.48214
1.0823	6	0.37273
1.234	6	0.54545
1.1889	6	0.79091
1.0278	6	0.098214
1.2118	6	0.36607
1.0538	6	0.7037
1.0242	6	0.30702
1.1854	6	0.76316
1.0643	6	0.25
1.1104	6	0.57895
1.0968	6	0.18605
1.0553	6	0.4186
1.0335	6	0.84884
1.0643	6	0.66981
1.3882	6	0.85849
1.2981	6	0.61111
1.0783	6	0.84444
1.2727	6	0.57
1.3366	6	0.68
1.0901	6	0.87
1.0178	6	0.16981
1.1554	6	0.82
1.0639	6	0.55319
1.0673	6	0.032258
1.0072	6	0.59677
1.2005	6	0.15179
1.0558	6	0.22449
1.1373	6	0.38776
1.0122	6	0.13265
1.0635	6	0.7449
1.4583	6	0.09375
1.3402	6	0.75
1.2709	6	0.48529
1.1138	6	0.77941
1.2392	6	0.95588
1.3662	6	0.47619
1.1894	6	0.10526
1.0647	6	0.5
1.0781	6	0.96491
1.2424	6	0.59259
1.0529	6	0.1
1.1216	6	0.93137
1.1125	6	0.45205
1.1706	6	0.27778
1.1001	6	0.2243
1.1528	6	0.71028
1.1667	6	0.25
1.0901	6	0.5
1.0212	6	0.63717
1.3214	6	0.38384
1.0698	6	0.72727
1.1955	6	0.037037
1.3412	6	0.5
1.1383	6	0.4375
1.1695	6	0.30435
1.0583	6	0.53043
1.1383	6	0.7913
1.1123	6	0.24545
1.1081	6	0.77273
1.101	6	0.05102
1.0262	6	0.2551
1.1337	6	0.28571
1.1663	6	0.34694
1.0096	6	0.54082
1.0826	6	0.090909
1.2579	6	0.25455
1.1012	6	0.85455
1.4388	6	0.57273
1.3273	6	0.09434
1.5026	6	0.66981
1.1579	6	0.72642
1.4125	6	0.52273
1.0592	6	0.63415
1.2563	6	0.17045
1.1898	6	0.38636
1.0506	6	0.54545
1.0528	6	0.31132
1.2119	6	0.57547
1.0356	6	0.21875
1.1488	6	0.49123
1.0186	6	0.070175
1.1407	6	0.26316
1.0211	6	0.028302
1.4141	6	0.26415
1.1742	6	0.50943
1.2434	6	0.19231
1.1035	6	0.54054
1.0935	6	0.93243
1.0639	6	0.67045
1.1159	6	0.875
1.0371	6	0.019048
1.0591	6	0.25714
1.1546	6	0.6381
1.1471	6	0.22549
1.0539	6	0.62745
1.1734	6	0.22093
1.1958	6	0.51163
1.1034	6	0.68605
1.0693	6	0.36585
1.0485	6	0.85366
1.0181	6	0.82353
1.0312	6	0.89216
1.3132	6	0.2381
1.13	6	0.85714
1.1942	6	0.46429
1.0145	6	0.48214
1.2739	6	0.86607
1.0908	6	0.04878
1.1384	6	0.47458
1.2043	6	0.91525
1.0509	6	0.24096
1.0457	6	0.80723
1.1962	6	0.38235
1.0572	6	0.83824
1.0743	6	0.46087
1.0821	6	0.90435
1.0341	6	0.25
1.1899	6	0.59211
1.3998	6	0.027778
1.0514	6	0.20833
1.065	6	0.73611
1.0649	6	0.63889
1.1521	6	0.13889
1.1815	6	0.30159
1.1433	6	1
1.0387	6	0.21795
1.2487	6	0.51282
1.0924	6	0.71795
1.1662	6	0.41667
1.1936	6	0.61111
1.0197	6	0.87037
1.0445	6	0.7
1.246	6	0.075758
1.3477	6	0.84848
1.5629	6	0.53333
1.0565	6	0.1375
1.0843	6	0.2875
1.3409	6	0.7875
1.0583	6	0.72581
1.2776	6	0.79032
1.2352	6	0.15
1.7334	6	0.25
1.2032	6	0.52
1.3442	6	0.74
1.0972	6	0.091837
1.0649	6	0.62245
1.2774	6	0.84694
1.1699	6	0.19
1.0201	6	0.34
1.2904	6	0.91
1.1864	6	0.27083
1.0942	6	0.66667
1.1264	6	0.14286
1.1081	6	0.5102
1.2329	6	0.79592
1.3977	6	0.85185
1.0703	6	0.37143
1.0745	6	0.54286
1.0161	6	0.21154
1.0441	6	0.44231
1.1752	6	0.037736
1.0555	6	0.67925
1.1587	6	1
1.0169	6	0.56863
1.2601	6	0.48387
1.0621	6	0.12
1.0163	6	0.8
1.0872	6	0.30233
1.1302	6	0.83721
1.7111	6	0.058824
1.0844	6	0.20588
1.0386	6	0.41176
1.2672	6	0.88235
1.0736	6	0.43137
1.104	6	0.54902
1.0606	6	0.32
1.0356	6	0.35714
1.0558	6	0.83871
1.1566	6	0.15909
1.0357	6	0.36364
1.049	6	0.86364
1.0665	6	0.71429
1.1185	7	0.73585
1.3487	7	0.30769
1.3033	7	0.13889
1.1376	7	0.30556
1.0391	7	0.0625
1.1926	7	0.28571
1.0734	7	0.19643
1.1508	7	0.48246
1.1556	7	0.64035
1.0618	7	0.60465
1.0878	7	0.033333
1.0488	7	0.94444
1.5164	7	0.84
1.2251	7	0.2
1.1505	7	0.59
1.0859	7	0.74
1.0346	7	0.6383
1.1114	7	0.5
1.0971	7	0.61607
1.0744	7	0.30612
1.0793	7	0.54082
1.0926	7	0.040816
1.1059	7	0.88776
1.0241	7	0.90816
1.0967	7	0.53125
1.1966	7	0.26984
1.1963	7	0.2807
1.127	7	0.14953
1.105	7	0.54206
1.2137	7	0.36538
1.032	7	0.59292
1.0711	7	0.20833
1.1917	7	0.31304
1.1759	7	0.66957
1.0303	7	0.81818
1.1341	7	0.30612
1.1702	7	0.34906
1.0093	7	0.68868
1.0566	7	0.78302
1.1619	7	0.22727
1.4254	7	0.88636
1.0364	7	0.18868
1.0243	7	0.69811
1.0144	7	0.96226
1.1205	7	0.3125
1.054	7	0.21053
1.0564	7	0.14912
1.0231	7	0.084906
1.0665	7	0.5641
1.2441	7	0.56757
1.1681	7	0.68182
1.1595	7	0.95455
1.1436	7	0.61905
1.185	7	0.27907
1.028	7	0.9186
1.2202	7	0.31707
1.5753	7	0.80488
1.0259	7	0.44118
1.0543	7	0.84314
1.0751	7	0.1125
1.0885	7	0.82927
1.376	7	0.37288
1.2766	7	0.84746
1.177	7	0.060241
1.1042	7	0.45783
1.0776	7	0.75904
1.0544	7	0.095652
1.0618	7	0.56522
1.2383	7	0.66957
1.0353	7	0.18056
1.1056	7	0.65278
1.046	7	0.83333
1.2058	7	0.16667
1.0891	7	0.047619
1.0535	7	0.19048
1.1693	7	0.025641
1.179	7	0.38462
1.1578	7	0.64103
1.6374	7	0.73148
1.039	7	0.06
1.1921	7	0.4
1.0906	7	0.225
1.1308	7	0.53226
1.1478	7	0.1
1.1404	7	0.57
1.1265	7	0.18367
1.0921	7	0.70408
1.2398	7	0.27
1.1236	7	0.77
1.1825	7	0.625
1.0542	7	0.2449
1.2639	7	0.34694
1.1792	7	0.85714
1.0443	7	0.37037
1.2006	7	0.48571
1.106	7	0.74286
1.1629	7	0.61538
1.0981	7	0.50943
1.0182	7	0.3913
1.1315	7	0.13725
1.0531	7	0.43137
1.4829	7	0.32558
1.1981	7	0.35294
1.046	7	0.13725
1.1334	7	0.86275
1.1045	7	0.5
1.0588	7	0.22581
1.2456	7	0.57143
1.174	8	0.37736
1.0461	8	0.67925
1.0729	8	0.20833
1.0625	8	0.43
1.0875	8	0.68
1.1665	8	0.020408
1.1595	8	0.89796
0.99698	8	0.86538
1.0426	8	0.52212
1.1781	8	0.010204
1.028	8	0.028302
1.1116	8	0.73585
1.0502	8	0.63542
1.1904	8	0.052632
1.2517	8	0.036585
1.1187	8	0.65686
1.0787	8	0.1375
1.0663	8	0.050847
1.0423	8	0.3012
1.2105	8	0.57831
1.0297	8	0.62609
1.0868	8	0.27778
1.0587	8	0.063492
1.1167	8	0.15873
1.1348	8	0.16
1.3928	8	0.33871
1.1096	8	0.30612
1.0462	8	0.33333
1.0376	8	0.21739
1.0427	8	0.35294
1.0753	8	0.39216
1.096	8	0.75
1.0871	8	0.46939
1.2116	9	0.18868
1.119	9	0.54717
1.1386	9	0.33628
1.3164	9	0.66667
1.7163	9	0.1625
1.157	9	0.095238
1.1052	9	0.40741
1.2552	9	0.88889
1.1951	9	0.37255
1.1455	9	0.26531
1.1531	10	0.68519
