# Supplementary material for: 3D cell neighbour dynamics in growing pseudostratified epithelia
Source: eLife. 2021 Oct 5;10:e68135. doi: 10.7554/eLife.68135 (PMC8570695; doi:10.7554/eLife.68135)
Supplement: Figure 4—source data 1. [file elife-68135-fig4-data1.xls]

## Sheet: CV_layer_tube
layer in um	area CV	neighbors	dataset
0.332	0.674235	5.46269	tube
0.664	0.674008	5.46269	tube
0.996	0.678494	5.51316	tube
1.328	0.682626	5.48684	tube
1.66	0.659811	5.59259	tube
1.992	0.677584	5.61728	tube
2.324	0.676386	5.61905	tube
2.656	0.697519	5.59524	tube
2.988	0.729943	5.50562	tube
3.32	0.72942	5.53409	tube
3.652	0.77136	5.48421	tube
3.984	0.777667	5.49462	tube
4.316	0.829988	5.46465	tube
4.648	0.858446	5.49	tube
4.98	0.877264	5.54455	tube
5.312	0.888441	5.53465	tube
5.644	0.903042	5.63462	tube
5.976	0.924622	5.625	tube
6.308	0.941812	5.57143	tube
6.64	0.920329	5.65347	tube
6.972	0.934166	5.59804	tube
7.304	0.952201	5.58252	tube
7.636	0.961519	5.55238	tube
7.968	0.957383	5.55238	tube
8.3	0.936286	5.56731	tube
8.632	0.940409	5.54808	tube
8.964	0.949998	5.51887	tube
9.296	0.936021	5.49057	tube
9.628	0.911774	5.50943	tube
9.96	0.880161	5.54286	tube
10.292	0.83839	5.58654	tube
10.624	0.819154	5.57143	tube
10.956	0.799832	5.62617	tube
11.288	0.794235	5.55046	tube
11.62	0.782758	5.52679	tube
11.952	0.746163	5.5	tube
12.284	0.715302	5.56637	tube
12.616	0.689058	5.61947	tube
12.948	0.666044	5.57522	tube
13.28	0.642625	5.60714	tube
13.612	0.631695	5.61404	tube
13.944	0.627626	5.58036	tube
14.276	0.618437	5.5614	tube
14.608	0.598023	5.59459	tube
14.94	0.593478	5.59821	tube
15.272	0.604893	5.61261	tube
15.604	0.604425	5.60177	tube
15.936	0.599832	5.60714	tube
16.268	0.610786	5.58407	tube
16.6	0.583608	5.63636	tube
16.932	0.602372	5.61062	tube
17.264	0.597433	5.625	tube
17.596	0.601593	5.56637	tube
17.928	0.598341	5.54867	tube
18.26	0.588002	5.5625	tube
18.592	0.586657	5.58929	tube
18.924	0.579923	5.59292	tube
19.256	0.576407	5.61062	tube
19.588	0.583481	5.58621	tube
19.92	0.576232	5.60345	tube
20.252	0.574916	5.57265	tube
20.584	0.563911	5.62069	tube
20.916	0.582096	5.56303	tube
21.248	0.570441	5.58475	tube
21.58	0.559387	5.57627	tube
21.912	0.549542	5.60684	tube
22.244	0.554832	5.55932	tube
22.576	0.53888	5.58261	tube
22.908	0.550671	5.53846	tube
23.24	0.525224	5.60177	tube
23.572	0.528038	5.59292	tube
23.904	0.500404	5.60909	tube
24.236	0.492559	5.58182	tube
24.568	0.495646	5.55046	tube
24.9	0.499422	5.52727	tube
25.232	0.512065	5.47273	tube
25.564	0.526147	5.42342	tube
25.896	0.519398	5.44954	tube
26.228	0.516836	5.51852	tube
26.56	0.545753	5.47273	tube
26.892	0.527561	5.57407	tube
27.224	0.52332	5.57944	tube
27.556	0.516196	5.57547	tube
27.888	0.510176	5.59048	tube
28.22	0.506767	5.64762	tube
28.552	0.514125	5.65714	tube
28.884	0.521478	5.65714	tube
29.216	0.522302	5.67619	tube
29.548	0.532081	5.64151	tube
29.88	0.525093	5.65714	tube
30.212	0.523378	5.66667	tube
30.544	0.521669	5.66346	tube
30.876	0.524418	5.69231	tube
31.208	0.505679	5.71569	tube
31.54	0.515727	5.66019	tube
31.872	0.514755	5.66019	tube
32.204	0.523078	5.625	tube
32.536	0.515844	5.64706	tube
32.868	0.526476	5.61765	tube
33.2	0.536544	5.67391	tube
33.532	0.53526	5.67391	tube
33.864	0.555282	5.60759	tube
34.196	0.5626	5.5625	tube
34.528	0.567895	5.67647	tube
34.86	0.572132	5.70588	tube
35.192	0.581536	5.7377	tube
35.524	0.555937	5.73333	tube
35.856	0.578086	5.67308	tube
36.188	0.567251	5.67308	tube
36.52	0.544136	5.80952	tube
36.852	0.514846	5.82927	tube
37.184	0.477665	5.91429	tube
37.516	0.461794	5.91429	tube
37.848	0.453677	5.91304	tube
38.18	0.445809	5.91304	tube
38.512	0.433434	6.06667	tube
0.172	0.413502	5.65789	tip
0.344	0.410384	5.7	tip
0.516	0.39036	5.69048	tip
0.688	0.400115	5.62222	tip
0.86	0.384425	5.62222	tip
1.032	0.39101	5.63043	tip
1.204	0.381551	5.70213	tip
1.376	0.428151	5.61538	tip
1.548	0.409363	5.62264	tip
1.72	0.420939	5.64815	tip
1.892	0.414241	5.69091	tip
2.064	0.416092	5.63636	tip
2.236	0.428954	5.60714	tip
2.408	0.424909	5.57143	tip
2.58	0.427331	5.57895	tip
2.752	0.458013	5.51724	tip
2.924	0.467016	5.51724	tip
3.096	0.489809	5.50847	tip
3.268	0.495902	5.49153	tip
3.44	0.504336	5.52542	tip
3.612	0.512576	5.49153	tip
3.784	0.521965	5.47458	tip
3.956	0.530045	5.44068	tip
4.128	0.536872	5.40678	tip
4.3	0.541653	5.40678	tip
4.472	0.54689	5.37288	tip
4.644	0.551944	5.33898	tip
4.816	0.557147	5.30508	tip
4.988	0.56051	5.32203	tip
5.16	0.564215	5.32203	tip
5.332	0.566558	5.32203	tip
5.504	0.567821	5.30508	tip
5.676	0.568615	5.28814	tip
5.848	0.567217	5.28814	tip
6.02	0.565845	5.28814	tip
6.192	0.560884	5.28814	tip
6.364	0.556422	5.30508	tip
6.536	0.552189	5.30508	tip
6.708	0.546733	5.33898	tip
6.88	0.540664	5.30508	tip
7.052	0.534183	5.32203	tip
7.224	0.526376	5.33898	tip
7.396	0.518377	5.33898	tip
7.568	0.509722	5.37288	tip
7.74	0.501029	5.37288	tip
7.912	0.490764	5.37288	tip
8.084	0.480838	5.38983	tip
8.256	0.47052	5.38983	tip
8.428	0.460987	5.38983	tip
8.6	0.451626	5.44068	tip
8.772	0.441618	5.45763	tip
8.944	0.432557	5.47458	tip
9.116	0.424309	5.49153	tip
9.288	0.416235	5.50847	tip
9.46	0.408941	5.50847	tip
9.632	0.400391	5.54237	tip
9.804	0.393069	5.55932	tip
9.976	0.386854	5.55932	tip
10.148	0.381041	5.54237	tip
10.32	0.375979	5.54237	tip
10.492	0.371216	5.52542	tip
10.664	0.367774	5.52542	tip
10.836	0.365863	5.50847	tip
11.008	0.364876	5.52542	tip
11.18	0.364088	5.54237	tip
11.352	0.363737	5.52542	tip
11.524	0.365611	5.55932	tip
11.696	0.368245	5.54237	tip
11.868	0.372439	5.50847	tip
12.04	0.37729	5.50847	tip
12.212	0.381841	5.49153	tip
12.384	0.386976	5.50847	tip
12.556	0.392065	5.52542	tip
12.728	0.327477	5.66071	tip
12.9	0.328333	5.625	tip
13.072	0.328897	5.60714	tip
13.244	0.329699	5.58929	tip
13.416	0.330519	5.58929	tip
13.588	0.332942	5.58929	tip
13.76	0.334678	5.64286	tip
13.932	0.337544	5.66071	tip
14.104	0.341487	5.66071	tip
14.276	0.348207	5.69643	tip
14.448	0.301276	5.75926	tip
14.62	0.302263	5.75926	tip
14.792	0.303945	5.77778	tip
14.964	0.306402	5.77778	tip
15.136	0.309073	5.77778	tip
15.308	0.312394	5.77778	tip
15.48	0.316642	5.75926	tip
15.652	0.320245	5.74074	tip
15.824	0.324051	5.72222	tip
15.996	0.327796	5.72222	tip
16.168	0.332468	5.71698	tip
16.34	0.336037	5.73585	tip
16.512	0.33947	5.73585	tip
16.684	0.342932	5.73585	tip
16.856	0.347292	5.75472	tip
17.028	0.353365	5.75472	tip
17.2	0.354276	5.76923	tip
17.372	0.359284	5.76923	tip
17.544	0.36582	5.78431	tip
17.716	0.3694	5.78431	tip
17.888	0.372197	5.78431	tip
18.06	0.376113	5.76471	tip
18.232	0.379922	5.76471	tip
18.404	0.386278	5.7451	tip
18.576	0.397776	5.74	tip
18.748	0.403512	5.75	tip
18.92	0.405398	5.7234	tip
19.092	0.417788	5.69565	tip
19.264	0.426796	5.67391	tip
19.436	0.423009	5.63636	tip
19.608	0.429793	5.63636	tip
19.78	0.441738	5.62791	tip
19.952	0.45025	5.62791	tip
20.124	0.429949	5.65	tip
20.296	0.451266	5.65	tip
20.468	0.450572	5.71053	tip
20.64	0.433552	5.64706	tip
20.812	0.445023	5.625	tip
20.984	0.458158	5.48276	tip
21.156	0.478317	5.46429	tip
21.328	0.416069	5.53846	tip
21.5	0.425258	5.53846	tip
21.672	0.387288	5.6	tip
21.844	0.390602	5.56522	tip
22.016	0.397805	5.56522	tip
22.188	0.414415	5.56522	tip
22.36	0.389392	5.7619	tip
22.532	0.413515	5.78947	tip
