# Supplementary material for: 3D cell neighbour dynamics in growing pseudostratified epithelia
Source: eLife. 2021 Oct 5;10:e68135. doi: 10.7554/eLife.68135 (PMC8570695; doi:10.7554/eLife.68135)
Supplement: Figure 4—source data 2. [file elife-68135-fig4-data2.xls]

## Sheet: aw_tube4
apical to basal	n	m	dataset
1	3	7.33333	tube
1	4	6.92029	tube
1	5	6.5637	tube
1	6	6.22892	tube
1	7	6.19345	tube
1	8	6.00733	tube
1	9	5.8125	tube
2	3	7.83333	tube
2	4	7.19444	tube
2	5	6.62593	tube
2	6	6.18966	tube
2	7	6.22662	tube
2	8	6.03175	tube
2	9	6.16204	tube
3	4	7.01923	tube
3	5	6.54683	tube
3	6	6.22083	tube
3	7	6.06933	tube
3	8	6.06656	tube
3	9	5.90516	tube
4	2	9.25	tube
4	3	6.91667	tube
4	4	7.18667	tube
4	5	6.77941	tube
4	6	6.11157	tube
4	7	6.16381	tube
4	8	5.86384	tube
4	9	6.5625	tube
5	2	7.5	tube
5	3	7	tube
5	4	6.88793	tube
5	5	6.48202	tube
5	6	6.24136	tube
5	7	6.33973	tube
5	8	5.9392	tube
5	9	6.19643	tube
6	3	7.55556	tube
6	4	6.90333	tube
6	5	6.35735	tube
6	6	6.26839	tube
6	7	6.0256	tube
6	8	6.04524	tube
6	9	5.82698	tube
7	3	8.25	tube
7	4	6.84921	tube
7	5	6.66216	tube
7	6	6.34286	tube
7	7	6.2	tube
7	8	5.98022	tube
7	9	5.92177	tube
8	3	8.95238	tube
8	4	7.30556	tube
8	5	6.53243	tube
8	6	6.16026	tube
8	7	6.21101	tube
8	8	5.71071	tube
8	9	6.04993	tube
9	3	8.19048	tube
9	4	7.23611	tube
9	5	6.39323	tube
9	6	6.31912	tube
9	7	6.23718	tube
9	8	5.99777	tube
9	9	5.74383	tube
10	3	8.14286	tube
10	4	7.03667	tube
10	5	6.76278	tube
10	6	6.23778	tube
10	7	6.05574	tube
10	8	5.96071	tube
10	9	5.78042	tube
11	3	8.18333	tube
11	5	6.72	tube
11	6	6.28631	tube
11	7	6.16012	tube
11	8	6.15844	tube
11	9	6.11458	tube
12	3	8.28571	tube
12	5	6.63978	tube
12	6	6.49048	tube
12	7	6.28175	tube
12	8	5.93745	tube
12	9	5.81443	tube
13	3	7.83333	tube
13	4	7.01449	tube
13	5	6.55294	tube
13	6	6.47436	tube
13	7	6.28471	tube
13	8	5.79536	tube
13	9	5.98796	tube
14	3	8.19048	tube
14	4	7.05864	tube
14	5	6.76538	tube
14	6	6.50833	tube
14	7	6.10642	tube
14	8	6.14929	tube
14	9	5.96062	tube
15	3	8.22917	tube
15	4	7.23276	tube
15	5	6.68966	tube
15	6	6.69533	tube
15	7	6.21342	tube
15	8	6.13968	tube
15	9	5.82897	tube
16	4	7.1875	tube
16	5	6.79785	tube
16	6	6.366	tube
16	7	6.37281	tube
16	8	6.23194	tube
16	9	6.20317	tube
17	3	9.29167	tube
17	4	7.22368	tube
17	5	6.67941	tube
17	6	6.44355	tube
17	7	6.19898	tube
17	8	6.24653	tube
17	9	6.11772	tube
18	3	9.28788	tube
18	4	7.26754	tube
18	5	6.675	tube
18	6	6.47525	tube
18	7	6.14583	tube
18	8	6.40774	tube
18	9	5.96025	tube
19	3	9.04762	tube
19	4	7.07609	tube
19	5	6.84213	tube
19	6	6.20123	tube
19	7	6.14369	tube
19	8	6.5625	tube
19	9	5.85739	tube
20	3	7.73333	tube
20	4	7.68333	tube
20	5	6.69017	tube
20	6	6.26603	tube
20	7	6.22794	tube
20	8	6.09209	tube
20	9	5.95352	tube
21	3	9.95833	tube
21	4	7.04861	tube
21	5	6.72048	tube
21	6	6.37759	tube
21	7	6.17676	tube
21	8	6.09194	tube
21	9	5.87698	tube
22	3	8.44444	tube
22	4	7.15774	tube
22	5	6.67824	tube
22	6	6.25115	tube
22	7	6.2599	tube
22	8	6.07685	tube
22	9	5.87897	tube
23	3	7.97222	tube
23	4	7.1087	tube
23	5	6.75045	tube
23	6	6.34744	tube
23	7	6.17562	tube
23	8	6.12302	tube
23	9	5.75425	tube
24	3	NA	tube
24	4	6.72333	tube
24	5	6.74216	tube
24	6	6.24635	tube
24	7	6.19859	tube
24	8	6.13636	tube
24	9	5.90005	tube
25	3	NA	tube
25	4	6.86719	tube
25	5	6.74423	tube
25	6	6.42716	tube
25	7	6.15439	tube
25	8	5.98512	tube
25	9	6.0434	tube
26	3	8.25	tube
26	4	6.9023	tube
26	5	6.68218	tube
26	6	6.36173	tube
26	7	6.2483	tube
26	8	5.74235	tube
26	9	5.93519	tube
27	3	7.80303	tube
27	4	6.725	tube
27	5	6.85196	tube
27	6	6.18133	tube
27	7	6.14734	tube
27	8	6.01004	tube
27	9	5.81944	tube
28	3	8.26667	tube
28	4	6.95652	tube
28	5	6.56068	tube
28	6	6.17681	tube
28	7	6.11105	tube
28	8	6.13036	tube
28	9	5.83611	tube
29	3	8	tube
29	4	6.87847	tube
29	5	6.60509	tube
29	6	6.22941	tube
29	7	6.14573	tube
29	8	6.01607	tube
29	9	5.72976	tube
30	3	7.80952	tube
30	4	7.00833	tube
30	5	6.51441	tube
30	6	6.295	tube
30	7	6.30998	tube
30	8	6.04762	tube
30	9	5.77948	tube
31	3	8.36667	tube
31	4	6.78704	tube
31	5	6.62796	tube
31	6	6.24381	tube
31	7	6.08333	tube
31	8	6.10985	tube
31	9	5.67857	tube
32	3	7.42857	tube
32	4	6.83333	tube
32	5	6.5401	tube
32	6	6.35707	tube
32	7	6.0999	tube
32	8	5.98077	tube
32	9	5.7174	tube
33	3	7.52083	tube
33	4	6.90972	tube
33	5	6.71162	tube
33	6	6.22469	tube
33	7	6.10725	tube
33	8	6.0157	tube
33	9	5.61161	tube
34	3	7.5	tube
34	4	6.90517	tube
34	5	6.76618	tube
34	6	6.25057	tube
34	7	6.08988	tube
34	8	5.96891	tube
34	9	5.41832	tube
35	3	7.66667	tube
35	4	6.91667	tube
35	5	6.69048	tube
35	6	6.19247	tube
35	7	6.05564	tube
35	8	5.75746	tube
35	9	5.79514	tube
36	3	7.75	tube
36	4	6.69203	tube
36	5	6.53125	tube
36	6	6.21496	tube
36	7	5.99784	tube
36	8	5.90873	tube
36	9	5.79861	tube
37	3	7.16667	tube
37	4	6.96333	tube
37	5	6.55253	tube
37	6	6.23739	tube
37	7	5.99827	tube
37	8	5.77641	tube
37	9	5.66111	tube
38	3	6.25	tube
38	4	6.96875	tube
38	5	6.54069	tube
38	6	6.30588	tube
38	7	5.91553	tube
38	8	5.90201	tube
38	9	5.68229	tube
39	4	6.92045	tube
39	5	6.4545	tube
39	6	6.21204	tube
39	7	5.90216	tube
39	8	5.78968	tube
39	9	5.69778	tube
40	4	6.90417	tube
40	5	6.39561	tube
40	6	6.20404	tube
40	7	5.97126	tube
40	8	5.81364	tube
40	9	5.65	tube
41	4	6.97101	tube
41	5	6.39479	tube
41	6	6.22714	tube
41	7	5.98605	tube
41	8	5.68333	tube
41	9	5.68148	tube
42	3	7.13333	tube
42	4	6.7963	tube
42	5	6.57097	tube
42	6	6.29848	tube
42	7	5.90737	tube
42	8	5.82476	tube
42	9	5.89385	tube
43	4	6.8287	tube
43	5	6.46406	tube
43	6	6.24722	tube
43	7	5.93276	tube
43	8	5.70863	tube
43	9	5.94907	tube
44	3	8.5	tube
44	4	6.97807	tube
44	5	6.5957	tube
44	6	6.29857	tube
44	7	5.97514	tube
44	8	5.79633	tube
44	9	5.74107	tube
45	3	7.66667	tube
45	4	6.85	tube
45	5	6.48556	tube
45	6	6.39234	tube
45	7	5.95495	tube
45	8	5.57823	tube
45	9	5.94643	tube
46	3	7.5	tube
46	4	6.96667	tube
46	5	6.43925	tube
46	6	6.35476	tube
46	7	5.93956	tube
46	8	5.74789	tube
46	9	5.64831	tube
47	3	7.66667	tube
47	4	6.78125	tube
47	5	6.46127	tube
47	6	6.32358	tube
47	7	5.93434	tube
47	8	5.5422	tube
47	9	5.86806	tube
48	3	7.5	tube
48	4	6.85294	tube
48	5	6.4481	tube
48	6	6.25045	tube
48	7	5.92546	tube
48	8	5.60268	tube
49	3	7.5	tube
49	4	6.87037	tube
49	5	6.61437	tube
49	6	6.22851	tube
49	7	6.02229	tube
49	8	5.65413	tube
50	3	7	tube
50	4	6.8287	tube
50	5	6.52644	tube
50	6	6.28784	tube
50	7	5.95357	tube
50	8	5.80455	tube
50	9	5.48148	tube
51	3	6.75	tube
51	4	6.77451	tube
51	5	6.55309	tube
51	6	6.28376	tube
51	7	5.87635	tube
51	8	5.76558	tube
51	9	5.38889	tube
52	3	7.16667	tube
52	4	6.77604	tube
52	5	6.47857	tube
52	6	6.21875	tube
52	7	5.94877	tube
52	8	5.72857	tube
52	9	5.46528	tube
53	4	6.71429	tube
53	5	6.44226	tube
53	6	6.27333	tube
53	7	5.93579	tube
53	8	5.68069	tube
54	4	6.72619	tube
54	5	6.50573	tube
54	6	6.22315	tube
54	7	5.90254	tube
54	8	5.6442	tube
54	9	5.44048	tube
55	3	7.16667	tube
55	4	6.61538	tube
55	5	6.40238	tube
55	6	6.16825	tube
55	7	5.99665	tube
55	8	5.66071	tube
56	3	7.44444	tube
56	4	6.825	tube
56	5	6.56183	tube
56	6	6.15175	tube
56	7	5.96437	tube
56	8	5.62765	tube
57	4	6.75694	tube
57	5	6.43467	tube
57	6	6.13841	tube
57	7	5.94456	tube
57	8	5.625	tube
58	3	7.75	tube
58	4	6.62778	tube
58	5	6.43462	tube
58	6	6.14125	tube
58	7	5.92028	tube
58	8	5.61534	tube
59	4	6.82692	tube
59	5	6.3454	tube
59	6	6.13772	tube
59	7	5.96244	tube
59	8	5.64583	tube
60	4	6.69444	tube
60	5	6.45517	tube
60	6	6.10691	tube
60	7	5.96289	tube
60	8	5.6631	tube
61	3	7.75	tube
61	4	6.76852	tube
61	5	6.43594	tube
61	6	6.17958	tube
61	7	6.03401	tube
61	8	5.70066	tube
62	3	7.58333	tube
62	4	6.65741	tube
62	5	6.44516	tube
62	6	6.13016	tube
62	7	5.9375	tube
62	8	5.84511	tube
63	3	7.33333	tube
63	4	6.55208	tube
63	5	6.36954	tube
63	6	6.10674	tube
63	7	5.91848	tube
63	8	5.88899	tube
64	3	7.13889	tube
64	4	6.89583	tube
64	5	6.34722	tube
64	6	6.14085	tube
64	7	5.86253	tube
64	8	5.74964	tube
65	3	7.46667	tube
65	4	6.71667	tube
65	5	6.37778	tube
65	6	6.10035	tube
65	7	5.90641	tube
65	8	5.67857	tube
66	3	7.05556	tube
66	4	6.80128	tube
66	5	6.43467	tube
66	6	6.1504	tube
66	7	5.97619	tube
66	8	5.70833	tube
67	3	6.875	tube
67	4	6.625	tube
67	5	6.30962	tube
67	6	6.04674	tube
67	7	5.95485	tube
67	8	5.71042	tube
68	3	7.5	tube
68	4	6.71296	tube
68	5	6.4244	tube
68	6	6.12421	tube
68	7	5.94514	tube
68	8	5.75097	tube
69	3	7.25	tube
69	4	6.84167	tube
69	5	6.27944	tube
69	6	6.06212	tube
69	7	5.91776	tube
69	8	5.7123	tube
70	3	7.25	tube
70	4	6.80556	tube
70	5	6.25057	tube
70	6	6.09894	tube
70	7	5.98435	tube
70	8	5.67976	tube
71	3	7.5	tube
71	4	6.56944	tube
71	5	6.31889	tube
71	6	6.12111	tube
71	7	6.00269	tube
71	8	5.64337	tube
72	4	6.73529	tube
72	5	6.3	tube
72	6	6.22033	tube
72	7	5.96294	tube
72	8	5.7419	tube
73	4	6.52941	tube
73	5	6.43722	tube
73	6	6.16748	tube
73	7	5.97506	tube
73	8	5.87321	tube
73	9	5.68403	tube
74	3	6.83333	tube
74	4	6.79412	tube
74	5	6.44219	tube
74	6	6.20463	tube
74	7	6.07754	tube
74	8	6.0045	tube
74	9	5.71706	tube
75	3	8	tube
75	4	6.6375	tube
75	5	6.37083	tube
75	6	6.1451	tube
75	7	6.17352	tube
75	8	5.8818	tube
75	9	5.7495	tube
76	4	7.01471	tube
76	5	6.4702	tube
76	6	6.18438	tube
76	7	6.12326	tube
76	8	6.125	tube
76	9	5.49405	tube
77	3	7.22222	tube
77	4	6.86404	tube
77	5	6.37133	tube
77	6	6.14685	tube
77	7	6.04762	tube
77	8	5.7996	tube
78	3	7.33333	tube
78	4	6.98611	tube
78	5	6.53403	tube
78	6	6.23922	tube
78	7	6.06114	tube
78	8	5.8631	tube
79	3	7.375	tube
79	4	6.93333	tube
79	5	6.50051	tube
79	6	6.33966	tube
79	7	5.9899	tube
79	8	5.82748	tube
80	3	7	tube
80	4	7.09921	tube
80	5	6.52246	tube
80	6	6.3162	tube
80	7	6.21226	tube
80	8	5.92143	tube
80	9	5.75714	tube
81	3	7.44444	tube
81	4	7.28704	tube
81	5	6.45575	tube
81	6	6.36444	tube
81	7	6.1958	tube
81	8	5.86081	tube
81	9	5.78307	tube
82	3	NA	tube
82	4	6.87037	tube
82	5	6.48854	tube
82	6	6.21049	tube
82	7	6.12798	tube
82	8	5.76786	tube
82	9	5.42857	tube
83	3	7.66667	tube
83	4	7.02222	tube
83	5	6.45893	tube
83	6	6.33722	tube
83	7	6.17857	tube
83	8	5.92474	tube
83	9	5.66667	tube
84	3	7.52083	tube
84	4	7.10784	tube
84	5	6.46	tube
84	6	6.29853	tube
84	7	6.10827	tube
84	8	5.92942	tube
84	9	5.67989	tube
85	3	7.66667	tube
85	4	7.02604	tube
85	5	6.556	tube
85	6	6.32917	tube
85	7	6.05227	tube
85	8	5.81019	tube
85	9	5.92593	tube
86	3	7.88889	tube
86	4	7.2451	tube
86	5	6.58403	tube
86	6	6.32778	tube
86	7	6.3225	tube
86	8	5.89921	tube
86	9	5.81984	tube
1	4	6.72619	tip
1	5	6.52879	tip
1	6	6.27813	tip
1	7	5.82109	tip
1	8	5.72222	tip
2	4	6.90278	tip
2	5	6.48846	tip
2	6	6.27143	tip
2	7	5.76333	tip
2	8	5.42222	tip
3	4	6.91667	tip
3	5	6.55119	tip
3	6	6.22949	tip
3	7	5.8314	tip
3	8	5.43056	tip
4	4	6.91667	tip
4	5	6.37222	tip
4	6	6.17051	tip
4	7	5.88677	tip
5	4	6.6875	tip
5	5	6.32179	tip
5	6	6.16458	tip
5	7	5.72693	tip
6	4	6.6875	tip
6	5	6.25521	tip
6	6	6.18571	tip
6	7	5.71381	tip
7	4	6.8	tip
7	5	6.55758	tip
7	6	6.28667	tip
7	7	5.82823	tip
7	8	5.64881	tip
8	4	6.875	tip
8	5	6.42222	tip
8	6	6.22949	tip
8	7	5.76508	tip
8	8	5.5	tip
9	4	6.75	tip
9	5	6.31458	tip
9	6	6.10833	tip
9	7	5.74272	tip
10	4	6.9375	tip
10	5	6.50556	tip
10	6	6.24697	tip
10	7	5.82068	tip
10	8	5.62698	tip
11	4	6.8125	tip
11	5	6.4	tip
11	6	6.12456	tip
11	7	5.88776	tip
11	8	5.79167	tip
12	4	6.58333	tip
12	5	6.52315	tip
12	6	6.12111	tip
12	7	5.87121	tip
12	8	5.65	tip
13	4	6.75	tip
13	5	6.52982	tip
13	6	6.18333	tip
13	7	5.88741	tip
13	8	5.83333	tip
14	5	6.37719	tip
14	6	6.13235	tip
14	7	5.86616	tip
14	8	5.5625	tip
15	4	7.45	tip
15	5	6.5614	tip
15	6	6.30455	tip
15	7	5.93498	tip
15	8	5.83333	tip
15	10	5.7	tip
16	4	7.625	tip
16	5	6.53	tip
16	6	6.17812	tip
16	7	5.84548	tip
16	8	5.58333	tip
16	9	5.94444	tip
17	4	6.875	tip
17	5	6.625	tip
17	6	6.17143	tip
17	7	5.92897	tip
17	8	5.8125	tip
17	9	5.77778	tip
18	4	7.125	tip
18	5	6.5975	tip
18	6	6.27889	tip
18	7	5.94187	tip
18	8	5.91667	tip
18	9	6	tip
19	4	6.75	tip
19	5	6.67807	tip
19	6	6.19118	tip
19	7	5.92718	tip
19	8	5.90625	tip
20	4	7.05	tip
20	5	6.56491	tip
20	6	6.25667	tip
20	7	5.85278	tip
20	9	5.77778	tip
21	4	6.875	tip
21	5	6.45098	tip
21	6	6.19035	tip
21	7	5.89492	tip
21	8	5.66964	tip
22	4	6.875	tip
22	5	6.38229	tip
22	6	6.08596	tip
22	7	5.87381	tip
22	8	5.875	tip
23	4	6.8	tip
23	5	6.47564	tip
23	6	6.11597	tip
23	7	5.84156	tip
23	8	5.91667	tip
24	4	7.01389	tip
24	5	6.40595	tip
24	6	6.18981	tip
24	7	5.78225	tip
24	8	5.84167	tip
25	4	7	tip
25	5	6.42222	tip
25	6	6.19352	tip
25	7	5.82075	tip
25	8	5.73958	tip
26	4	7.01389	tip
26	5	6.39286	tip
26	6	6.18583	tip
26	7	5.81973	tip
26	8	5.91667	tip
27	4	6.86905	tip
27	5	6.33452	tip
27	6	6.01812	tip
27	7	5.84325	tip
27	8	5.75	tip
28	3	7.5	tip
28	4	6.95833	tip
28	5	6.50833	tip
28	6	6.09394	tip
28	7	5.78956	tip
28	8	5.675	tip
29	4	6.92708	tip
29	5	6.39487	tip
29	6	6.15263	tip
29	7	5.75165	tip
29	8	5.84375	tip
30	4	6.88542	tip
30	5	6.33056	tip
30	6	6.18529	tip
30	7	5.87169	tip
30	8	5.8125	tip
31	4	7.05952	tip
31	5	6.31515	tip
31	6	6.13833	tip
31	7	5.84206	tip
31	8	6	tip
32	4	7.18056	tip
32	5	6.26667	tip
32	6	6.09649	tip
32	7	5.93238	tip
32	8	6.04167	tip
33	4	7.18056	tip
33	5	6.43333	tip
33	6	6.24524	tip
33	7	5.90741	tip
33	8	5.5375	tip
34	4	7.16667	tip
34	5	6.43333	tip
34	6	6.10294	tip
34	7	5.89354	tip
34	8	5.70536	tip
35	4	7	tip
35	5	6.20098	tip
35	6	6.10303	tip
35	7	5.90873	tip
35	8	5.59643	tip
36	4	7.125	tip
36	5	6.31863	tip
36	6	6.25093	tip
36	7	5.99984	tip
36	8	5.63482	tip
37	4	6.9375	tip
37	5	6.13452	tip
37	6	6.18106	tip
37	7	5.98661	tip
38	4	6.83333	tip
38	5	6.45222	tip
38	6	6.10417	tip
38	7	5.91429	tip
38	8	5.86111	tip
39	4	7.07292	tip
39	5	6.30256	tip
39	6	6.30784	tip
39	7	5.95658	tip
40	4	7	tip
40	5	6.28214	tip
40	6	6.2537	tip
40	7	5.98403	tip
41	4	7	tip
41	5	6.30556	tip
41	6	6.29035	tip
41	7	5.96148	tip
42	4	7.21667	tip
42	5	6.26071	tip
42	6	6.35159	tip
42	7	5.94494	tip
43	4	6.83333	tip
43	5	6.45758	tip
43	6	6.19444	tip
43	7	5.9983	tip
43	8	5.92857	tip
44	4	6.70238	tip
44	5	6.72143	tip
44	6	6.2287	tip
44	7	5.84848	tip
44	8	5.97143	tip
45	4	6.63333	tip
45	5	6.29231	tip
45	6	6.13922	tip
45	7	5.95462	tip
45	8	6.07143	tip
46	4	6.83333	tip
46	5	6.3869	tip
46	6	6.18854	tip
46	7	5.95658	tip
46	8	5.80357	tip
47	4	6.73333	tip
47	5	6.37976	tip
47	6	6.11354	tip
47	7	5.9122	tip
47	8	6.16667	tip
48	4	6.83333	tip
48	5	6.35833	tip
48	6	6.20595	tip
48	7	5.98417	tip
48	8	6.04167	tip
49	4	6.83333	tip
49	5	6.39333	tip
49	6	6.27255	tip
49	7	5.9419	tip
49	8	6	tip
50	4	6.9	tip
50	5	6.35128	tip
50	6	6.26444	tip
50	7	5.93915	tip
50	8	6.125	tip
51	4	6.83333	tip
51	5	6.45128	tip
51	6	6.23125	tip
51	7	5.90306	tip
51	8	5.96429	tip
52	4	6.91667	tip
52	5	6.42889	tip
52	6	6.31569	tip
52	7	6.01531	tip
52	8	6.04167	tip
53	4	6.79167	tip
53	5	6.32222	tip
53	6	6.09907	tip
53	7	5.91922	tip
53	8	5.9375	tip
54	4	6.7	tip
54	5	6.3381	tip
54	6	6.12407	tip
54	7	5.93425	tip
54	8	5.875	tip
55	4	6.91667	tip
55	5	6.33556	tip
55	6	6.08947	tip
55	7	5.89103	tip
55	8	6	tip
56	4	6.96667	tip
56	5	6.41111	tip
56	6	6.1254	tip
56	7	5.84722	tip
56	9	5.76389	tip
57	4	7.10714	tip
57	5	6.53056	tip
57	6	6.36	tip
57	7	5.88117	tip
57	8	5.80655	tip
58	3	8.33333	tip
58	4	7.08333	tip
58	5	6.3381	tip
58	6	6.48889	tip
58	7	5.97294	tip
58	8	6.16518	tip
58	9	6	tip
59	4	7.18056	tip
59	5	6.39444	tip
59	6	6.39286	tip
59	7	5.94065	tip
59	8	6.15476	tip
59	9	6.05556	tip
60	3	8.16667	tip
60	4	7.01667	tip
60	5	6.29	tip
60	6	6.38241	tip
60	7	5.87718	tip
60	8	6.02976	tip
60	9	5.94444	tip
61	3	8.16667	tip
61	4	7.01389	tip
61	5	6.3	tip
61	6	6.35444	tip
61	7	5.83874	tip
61	8	5.92857	tip
62	3	8	tip
62	4	6.875	tip
62	5	6.28889	tip
62	6	6.225	tip
62	7	5.92249	tip
62	8	5.87143	tip
63	4	6.85	tip
63	5	6.21333	tip
63	6	6.18158	tip
63	7	5.86607	tip
63	8	6.04167	tip
64	4	6.85	tip
64	5	6.22	tip
64	6	6.17963	tip
64	7	5.90238	tip
64	8	6.04167	tip
65	4	6.63889	tip
65	5	6.31111	tip
65	6	6.26316	tip
65	7	5.9754	tip
65	8	5.96429	tip
66	4	6.8125	tip
66	5	6.28889	tip
66	6	6.145	tip
66	7	5.93	tip
66	8	6.04167	tip
67	4	6.72917	tip
67	5	6.24167	tip
67	6	6.075	tip
67	7	5.97398	tip
68	4	6.78333	tip
68	5	6.24167	tip
68	6	6.075	tip
68	7	5.93231	tip
69	4	6.85	tip
69	5	6.27619	tip
69	6	6.14902	tip
69	7	5.97889	tip
70	4	6.80556	tip
70	5	6.44444	tip
70	6	6.17549	tip
70	7	5.88919	tip
71	4	6.84722	tip
71	5	6.53333	tip
71	6	6.18039	tip
71	7	5.95437	tip
71	8	5.625	tip
72	4	6.61667	tip
72	5	6.42222	tip
72	6	6.18704	tip
72	7	5.95452	tip
72	8	5.8125	tip
73	4	6.71667	tip
73	5	6.46667	tip
73	6	6.16316	tip
73	7	5.90079	tip
74	4	6.61667	tip
74	5	6.42222	tip
74	6	6.19815	tip
74	7	5.95108	tip
74	8	5.8125	tip
75	4	6.5	tip
75	5	6.55833	tip
75	6	6.23056	tip
75	7	5.97917	tip
75	8	6.025	tip
76	4	6.9375	tip
76	5	6.4119	tip
76	6	6.1193	tip
76	7	5.80833	tip
76	8	5.75	tip
77	4	6.8	tip
77	5	6.40714	tip
77	6	6.13981	tip
77	7	5.96429	tip
77	8	5.7381	tip
78	4	6.5	tip
78	5	6.55625	tip
78	6	6.1213	tip
78	7	5.88571	tip
78	8	5.8125	tip
79	4	6.66667	tip
79	5	6.64762	tip
79	6	6.10882	tip
79	7	5.97698	tip
79	8	5.8125	tip
80	4	7.05	tip
80	5	6.84583	tip
80	6	6.09271	tip
80	7	6.05079	tip
80	8	5.77232	tip
81	4	6.41667	tip
81	5	6.21	tip
81	6	6.07807	tip
81	7	5.91071	tip
81	8	5.75	tip
82	4	6.875	tip
82	5	6.33667	tip
82	6	6.10833	tip
82	7	6.1	tip
82	8	5.75	tip
83	4	6.75	tip
83	5	6.63889	tip
83	6	6.26282	tip
83	7	6.29167	tip
83	8	6.00625	tip
84	4	6.625	tip
84	5	6.3875	tip
84	6	6.08241	tip
84	7	6.13095	tip
84	8	5.75	tip
85	5	6.37619	tip
85	6	6.15556	tip
85	7	5.82653	tip
86	4	7.25	tip
86	5	7.04167	tip
86	6	6.27879	tip
86	7	6.28571	tip
86	8	5.94167	tip
87	4	6.5	tip
87	5	6.37333	tip
87	6	6.11042	tip
87	7	5.92857	tip
88	4	7.55	tip
88	5	6.58333	tip
88	6	6.24167	tip
88	7	6.38095	tip
88	8	5.91667	tip
89	4	7.625	tip
89	5	6.49167	tip
89	6	6.28182	tip
89	7	6.17857	tip
89	8	5.875	tip
90	4	7.0625	tip
90	5	6.56667	tip
90	6	6.11282	tip
90	7	6.28571	tip
90	8	5.66667	tip
91	4	7.16667	tip
91	5	6.59333	tip
91	6	6.12037	tip
91	7	5.97857	tip
91	8	5.83333	tip
