# Supplementary material for: 3D cell neighbour dynamics in growing pseudostratified epithelia
Source: eLife. 2021 Oct 5;10:e68135. doi: 10.7554/eLife.68135 (PMC8570695; doi:10.7554/eLife.68135)
Supplement: Figure 4—source data 3. [file elife-68135-fig4-data3.xls]

## Sheet: location
cellId	layer	neighbour	type
1	11	9	1
1	21	8	-1
1	30	9	1
1	37	8	-1
1	40	7	-1
1	48	6	-1
1	50	5	-1
2	72	4	1
2	77	5	1
2	79	6	1
2	81	7	1
2	98	6	-1
3	11	5	1
3	16	6	1
3	23	7	1
3	43	8	1
3	49	7	-1
3	61	6	-1
3	70	5	-1
4	8	5	-2
4	16	4	-1
4	33	5	1
4	55	6	1
5	9	7	-1
5	15	6	-1
5	23	7	1
5	42	6	-1
5	52	5	-1
5	61	4	-1
5	82	5	1
5	88	6	1
5	100	5	-1
6	4	5	-1
6	44	6	1
6	63	5	-1
7	12	5	-1
7	23	6	1
7	42	5	-1
7	46	4	-1
7	67	5	1
7	70	6	1
8	3	5	1
8	42	6	1
8	45	7	1
8	53	6	-1
8	77	5	-1
8	102	6	1
9	8	4	-1
9	25	5	1
9	36	4	-1
9	56	5	1
9	88	6	1
10	62	5	1
10	72	6	1
11	60	5	1
11	67	6	1
11	74	5	-1
11	90	6	1
12	25	4	1
12	37	5	1
12	43	6	1
12	45	7	1
12	57	6	-1
12	73	5	-1
12	94	4	-1
13	15	6	1
13	22	5	-1
13	59	6	1
13	72	7	1
13	92	6	-1
14	14	4	1
14	66	5	1
14	76	6	1
14	87	5	-1
14	96	6	1
15	44	5	1
15	52	6	1
15	58	7	1
15	65	6	-1
15	69	5	-1
15	77	4	-1
15	85	5	1
15	88	6	1
15	97	5	-1
16	19	6	-1
16	54	7	1
16	64	6	-1
16	100	7	1
17	21	5	-1
17	60	6	1
17	69	7	1
17	75	8	1
17	83	7	-1
18	18	5	1
18	21	6	1
18	44	5	-1
18	53	4	-1
19	29	6	-1
19	57	5	-1
19	65	4	-1
20	5	7	1
20	34	6	-1
20	40	5	-1
20	42	4	-1
21	7	6	-1
21	11	5	-1
21	18	4	-1
21	70	5	1
21	84	6	1
22	17	7	1
22	24	6	-1
23	10	7	1
23	27	8	1
23	35	7	-1
23	43	6	-1
23	58	5	-1
24	7	5	-1
24	9	4	-1
24	18	3	-1
24	38	4	1
24	52	5	1
24	59	6	1
24	66	7	1
24	70	6	-1
24	78	7	1
24	92	6	-1
24	93	5	-1
24	94	4	-1
24	100	3	-1
25	72	5	1
25	86	6	1
25	93	7	1
25	97	6	-1
26	23	4	-1
26	36	3	-1
26	44	4	1
26	49	5	1
26	56	6	1
26	61	7	1
26	68	6	-1
27	34	6	1
27	42	7	1
27	47	8	1
27	58	7	-1
27	65	6	-1
27	66	5	-1
27	67	4	-1
28	13	4	-1
28	14	3	-1
28	33	4	1
28	58	5	1
28	62	6	1
28	70	7	1
28	84	8	1
28	107	7	-1
28	111	6	-1
29	57	5	1
29	62	6	1
29	83	7	1
29	89	6	-1
30	14	6	1
30	35	5	-1
30	60	4	-1
31	33	5	-1
31	48	6	1
31	76	5	-1
31	98	4	-1
31	102	3	-1
32	68	6	1
32	76	5	-1
32	85	6	1
33	24	6	1
33	35	7	1
33	45	6	-1
34	15	7	1
35	25	5	-1
35	33	6	1
35	67	5	-1
35	85	6	1
36	13	5	1
36	27	4	-1
36	39	5	1
36	53	6	1
36	74	5	-1
36	91	4	-1
37	41	7	1
37	62	6	-1
37	70	5	-1
37	75	4	-1
37	110	5	1
38	63	4	1
38	78	5	1
38	91	6	1
38	100	7	1
39	20	5	1
39	71	6	1
40	55	5	1
40	64	6	1
40	89	5	-1
40	116	6	1
41	9	6	-1
41	19	5	-1
41	23	4	-1
41	53	3	-1
41	59	4	1
41	64	5	1
41	87	6	1
41	104	7	1
42	33	4	1
42	55	5	1
42	76	6	1
42	89	5	-1
42	95	4	-1
43	20	5	-1
43	36	4	-1
43	37	5	1
43	43	6	1
43	62	7	1
43	78	6	-1
43	92	7	1
43	108	6	-1
44	11	6	-1
44	28	5	-1
44	33	6	1
44	50	7	1
44	74	6	-1
44	86	5	-1
44	91	6	1
45	10	8	1
45	14	9	1
45	30	8	-1
45	34	7	-1
45	37	6	-1
45	39	5	-1
45	43	4	-1
45	62	3	-1
45	100	4	1
45	104	5	1
46	9	5	-1
46	11	4	-1
46	29	5	1
46	38	6	1
46	71	5	-1
46	85	6	1
46	95	5	-1
47	14	5	-1
47	43	6	1
47	64	5	-1
47	67	4	-1
47	102	3	-1
48	13	5	-1
48	40	6	1
48	74	5	-1
48	76	4	-1
48	80	5	1
48	86	6	1
49	79	7	1
49	82	6	-1
49	88	5	-1
49	92	4	-1
50	69	5	1
50	93	6	1
51	28	4	-1
51	40	5	1
51	46	6	1
51	58	7	1
52	93	7	1
52	101	8	1
53	34	5	1
53	42	6	1
53	47	7	1
53	61	6	-1
53	73	5	-1
53	75	4	-1
53	105	5	1
54	4	6	-1
54	21	5	-1
54	34	4	-1
54	57	5	1
54	62	6	1
54	75	7	1
54	79	8	1
54	103	7	-1
55	38	6	1
55	47	5	-1
55	78	6	1
55	81	7	1
56	62	6	1
56	71	7	1
56	78	6	-1
56	87	5	-1
57	4	6	-1
57	9	5	-1
57	18	4	-1
57	31	5	1
57	56	6	1
57	66	7	1
58	51	6	1
58	76	5	-1
58	81	4	-1
59	87	5	1
60	46	6	-1
61	12	4	1
61	18	5	1
61	37	6	1
61	47	5	-1
61	63	4	-1
61	102	5	1
62	50	6	1
62	79	5	-1
63	59	4	1
63	79	5	1
63	81	6	1
63	108	7	1
64	26	7	1
64	44	6	-1
64	82	7	1
64	83	6	-1
64	100	7	1
64	107	6	-1
65	13	4	1
65	36	5	1
65	38	6	1
65	76	5	-1
65	78	4	-1
65	80	3	-1
65	106	4	1
66	22	5	1
66	34	4	-1
66	43	3	-1
66	75	4	1
66	79	5	1
66	81	6	1
67	27	6	1
67	32	5	-1
67	37	6	1
67	57	7	1
67	72	6	-1
67	92	5	-1
68	37	5	1
68	60	6	1
68	64	7	1
68	97	8	1
68	100	7	-1
68	104	6	-1
68	110	5	-1
69	38	5	-1
69	56	6	1
69	78	7	1
69	81	8	1
69	95	7	-1
69	97	6	-1
69	102	5	-1
70	8	7	1
70	13	8	1
70	15	9	1
70	27	8	-1
70	36	7	-1
70	39	6	-1
71	9	5	1
71	11	6	1
71	28	5	-1
71	30	6	1
71	32	7	1
71	38	6	-1
71	53	5	-1
71	54	4	-1
71	55	3	-1
71	58	4	1
71	69	5	1
71	77	4	-1
71	98	5	1
71	100	6	1
72	44	6	1
72	46	7	1
72	48	6	-1
72	76	5	-1
73	36	5	1
73	38	6	1
73	54	5	-1
73	74	6	1
73	95	7	1
73	102	6	-1
74	37	5	1
74	56	6	1
74	62	7	1
74	77	6	-1
74	84	5	-1
74	88	4	-1
75	38	5	1
75	53	6	1
75	58	7	1
75	71	6	-1
75	81	7	1
75	96	6	-1
75	100	7	1
76	6	5	1
76	27	6	1
76	31	7	1
76	41	6	-1
76	53	5	-1
76	58	4	-1
77	12	4	-1
77	34	5	1
77	38	6	1
77	54	5	-1
77	66	6	1
77	73	5	-1
77	78	4	-1
77	105	5	1
78	38	5	1
78	46	6	1
78	58	7	1
78	72	6	-1
78	89	7	1
79	11	6	1
79	22	7	1
79	24	8	1
79	40	7	-1
79	56	6	-1
79	62	5	-1
79	69	4	-1
80	17	7	1
80	34	6	-1
80	36	5	-1
80	43	4	-1
81	84	4	1
81	85	7	3
81	86	8	1
81	90	9	1
82	14	5	1
82	15	6	1
82	17	7	1
82	21	6	-1
82	23	5	-1
82	30	6	1
82	48	5	-1
82	74	4	-1
83	37	4	1
83	52	5	1
83	65	6	1
83	75	5	-1
83	85	4	-1
83	91	5	1
83	99	4	-1
84	11	5	-1
84	24	4	-1
84	40	5	1
84	46	6	1
84	67	5	-1
84	80	6	1
84	82	5	-1
84	86	4	-1
84	95	5	1
85	4	5	1
85	9	6	1
85	21	5	-1
85	36	4	-1
86	69	5	-1
87	6	7	1
87	12	8	1
87	17	9	1
87	57	5	-4
87	62	4	-1
87	67	3	-1
88	23	6	-1
88	26	5	-1
88	29	4	-1
89	48	5	1
89	69	4	-1
89	76	5	1
90	14	7	1
90	21	8	1
90	26	7	-1
90	53	6	-1
90	66	5	-1
90	72	4	-1
91	12	7	1
91	28	6	-1
91	40	7	1
91	52	6	-1
91	56	5	-1
92	11	8	1
92	16	7	-1
92	26	8	1
92	45	7	-1
92	53	6	-1
92	58	5	-1
92	75	6	1
92	100	5	-1
93	10	5	-1
93	19	4	-1
93	62	5	1
93	70	6	1
93	77	7	1
93	84	5	-2
94	9	4	-1
94	20	5	1
94	28	6	1
94	35	7	1
94	41	8	1
94	44	7	-1
94	68	6	-1
94	78	5	-1
94	92	6	1
95	11	6	1
95	15	5	-1
95	37	6	1
95	55	5	-1
95	83	4	-1
96	27	6	1
96	61	7	1
96	65	6	-1
96	71	5	-1
96	77	4	-1
97	15	7	1
97	25	6	-1
97	31	5	-1
97	35	4	-1
97	51	5	1
97	71	6	1
97	79	7	1
97	85	8	1
98	71	5	1
98	73	6	1
98	81	7	1
98	93	8	1
98	99	7	-1
99	5	7	1
99	13	8	1
99	17	9	1
99	27	8	-1
99	35	7	-1
99	39	6	-1
99	53	5	-1
100	23	5	1
100	33	6	1
100	47	7	1
100	65	6	-1
101	5	6	1
101	13	7	1
101	31	6	-1
101	55	7	1
101	73	6	-1
101	85	5	-1
101	103	4	-1
102	21	3	-2
102	31	4	1
102	45	5	1
102	75	6	1
102	97	7	1
103	11	6	1
103	19	7	1
103	47	4	-3
104	15	4	1
104	37	5	1
104	39	6	1
104	41	7	1
104	45	8	1
104	59	7	-1
104	81	6	-1
104	87	5	-1
104	91	4	-1
105	75	6	1
105	91	7	1
106	13	4	1
106	17	5	1
106	33	6	1
106	65	5	-1
106	81	6	1
107	49	5	1
107	51	6	1
107	95	5	-1
108	7	5	1
108	19	4	-1
108	22	3	-1
108	37	4	1
108	43	5	1
108	47	6	1
108	53	7	1
108	63	6	-1
108	73	5	-1
108	91	4	-1
109	15	6	1
109	45	5	-1
109	57	4	-1
109	89	5	1
110	17	8	1
110	35	7	-1
110	43	6	-1
110	47	5	-1
111	53	6	1
111	67	7	1
111	75	6	-1
111	89	5	-1
112	55	6	1
112	93	7	1
113	31	5	1
113	33	6	1
113	49	7	1
113	61	6	-1
113	93	7	1
114	35	5	1
114	55	6	1
114	65	7	1
114	79	6	-1
114	87	7	1
114	99	6	-1
115	13	5	-1
115	35	6	1
115	55	5	-1
115	59	4	-1
116	15	6	1
116	29	7	1
116	49	6	-1
116	51	5	-1
116	55	4	-1
116	77	3	-1
116	89	4	1
117	21	7	1
117	31	6	-1
117	55	5	-1
117	59	4	-1
117	73	5	1
117	88	6	1
118	13	4	-1
118	33	5	1
118	37	6	1
118	55	7	1
118	75	6	-1
118	87	5	-1
118	99	6	1
119	32	5	1
119	33	6	1
119	43	7	1
119	47	8	1
119	55	7	-1
119	75	6	-1
120	23	6	1
120	33	5	-1
120	35	6	1
120	57	7	1
120	77	8	1
120	83	7	-1
120	89	6	-1
121	15	4	-1
121	31	5	1
121	43	6	1
121	75	5	-1
122	55	5	-1
122	83	6	1
123	9	4	-1
123	49	5	1
123	57	6	1
123	65	7	1
123	89	6	-1
124	47	6	1
124	55	7	1
124	67	6	-1
124	69	5	-1
124	81	6	1
124	87	5	-1
125	11	7	1
125	27	6	-1
125	43	5	-1
125	49	4	-1
125	83	5	1
126	33	7	1
126	43	6	-1
126	49	5	-1
126	53	4	-1
126	83	3	-1
126	89	4	1
126	91	5	1
127	11	9	1
127	15	10	1
127	21	9	-1
127	32	8	-1
127	34	7	-1
127	35	6	-1
128	59	6	1
128	77	5	-1
129	17	7	1
129	29	8	1
129	33	9	1
129	51	8	-1
129	59	7	-1
129	65	6	-1
129	67	5	-1
129	87	6	1
130	13	4	-1
130	35	5	1
130	45	6	1
130	71	5	-1
130	93	4	-1
131	5	6	1
131	15	5	-1
131	23	4	-1
131	59	5	1
131	69	6	1
131	71	7	1
132	21	6	1
132	29	7	1
132	71	6	-1
132	87	7	1
133	19	6	-1
133	77	5	-1
134	13	5	1
134	19	6	1
134	27	7	1
134	45	6	-1
134	49	5	-1
134	81	6	1
135	13	3	-1
135	21	4	1
135	35	5	1
135	51	6	1
135	79	7	1
135	85	6	-1
135	95	5	-1
136	57	6	1
136	63	7	1
136	71	6	-1
136	75	5	-1
136	93	4	-1
136	101	3	-1
137	57	4	1
137	61	5	1
137	77	6	1
137	79	7	1
137	85	8	1
137	91	7	-1
137	95	6	-1
137	99	5	-1
138	17	6	1
138	23	5	-1
138	37	6	1
138	39	5	-1
139	11	5	-1
139	15	6	1
139	17	9	3
139	23	8	-1
139	27	7	-1
139	39	6	-1
139	43	5	-1
140	26	8	-1
