# Supplementary material for: 3D cell neighbour dynamics in growing pseudostratified epithelia
Source: eLife. 2021 Oct 5;10:e68135. doi: 10.7554/eLife.68135 (PMC8570695; doi:10.7554/eLife.68135)
Supplement: Figure 5—source data 1. [file elife-68135-fig5-data1.xls]

## Sheet: a
cellId	neighbours	nuclear area	cell area	layer	dataset
1	8	7.63	28.829	73	tube
1	8	10.5	27.948	74	tube
1	8	13.455	27.223	75	tube
1	8	17.291	26.797	76	tube
1	8	20.162	29.155	77	tube
1	8	23.117	31.869	78	tube
1	8	25.674	35.947	79	tube
1	8	27.976	40.352	80	tube
1	8	29.567	40.877	81	tube
1	8	31.486	41.858	82	tube
1	9	34.1	44.344	83	tube
1	9	37.112	47.257	84	tube
1	9	41.517	50.923	85	tube
1	9	45.566	55.057	86	tube
1	9	48.081	55.966	87	tube
1	9	49.729	57.046	88	tube
1	9	50.553	58.694	89	tube
1	9	50.766	60.726	90	tube
1	9	52.002	61.479	91	tube
1	9	53.068	62.417	92	tube
1	8	53.793	62.715	93	tube
1	8	54.872	63.582	94	tube
1	8	56.847	65.784	95	tube
1	8	58.382	68.413	96	tube
1	8	59.362	69.052	97	tube
1	8	59.618	70.047	98	tube
1	8	58.709	67.39	99	tube
1	8	57.245	65.33	100	tube
1	8	55.441	63.184	101	tube
1	9	53.807	61.266	102	tube
1	9	52.287	60.641	103	tube
1	9	50.795	60.229	104	tube
1	9	49.345	57.927	105	tube
1	9	47.356	55.512	106	tube
1	9	44.742	53.466	107	tube
1	9	42.071	51.448	108	tube
1	8	40.266	49.672	109	tube
1	8	37.808	48.038	110	tube
1	8	34.285	44.571	111	tube
1	7	30.747	41.204	112	tube
1	7	28.587	39.286	113	tube
1	7	27.493	37.481	114	tube
1	7	26.356	34.484	115	tube
1	7	25.177	32.622	116	tube
1	7	23.884	31.628	117	tube
1	7	21.867	30.832	118	tube
1	7	18.954	30.818	119	tube
1	6	14.919	31.059	120	tube
1	6	8.354	27.038	121	tube
1	5	2.7	24.126	122	tube
1	5	0	21.042	123	tube
1	5	0	18.854	124	tube
1	5	0	15.302	125	tube
1	5	0	12.333	126	tube
2	3	0	2.501	138	tube
2	3	0	2.913	139	tube
2	3	0	3.524	140	tube
2	3	0	4.348	141	tube
2	3	0	5.442	142	tube
2	3	0	4.873	143	tube
2	3	0	4.845	144	tube
2	3	0	6.209	145	tube
2	3	3.652	7.758	146	tube
2	4	8.383	13.711	147	tube
2	4	14.436	28.09	148	tube
2	4	18.286	27.763	149	tube
2	4	21.213	27.621	150	tube
2	4	22.179	28.26	151	tube
2	5	23.415	29.155	152	tube
2	5	25.021	30.889	153	tube
2	6	26.371	33.148	154	tube
2	6	27.465	33.532	155	tube
2	7	28.005	34.341	156	tube
2	7	28.019	35.023	157	tube
2	7	28.317	35.919	158	tube
2	7	29.44	36.217	159	tube
2	7	30.534	36.743	160	tube
2	7	31.4	37.666	161	tube
2	7	32.338	38.703	162	tube
2	7	33.262	39.229	163	tube
2	7	34.739	40.053	164	tube
2	7	36.316	41.588	165	tube
2	7	36.998	43.364	166	tube
2	7	36.942	43.918	167	tube
2	7	36.942	44.33	168	tube
2	7	35.776	43.463	169	tube
2	7	34.853	42.838	170	tube
2	7	34.611	42.454	171	tube
2	7	33.986	42.085	172	tube
2	6	32.636	41.616	173	tube
2	6	31.599	41.176	174	tube
2	6	29.98	40.039	175	tube
2	6	28.601	38.973	176	tube
2	6	27.252	38.519	177	tube
2	6	26.598	38.419	178	tube
2	6	25.575	37.453	179	tube
2	6	24.779	36.544	180	tube
2	6	23.628	34.569	181	tube
2	6	22.307	32.722	182	tube
2	6	20.815	29.965	183	tube
2	6	19.551	27.919	184	tube
2	6	17.76	25.063	185	tube
2	6	15.317	22.733	186	tube
2	6	12.816	22.534	187	tube
2	6	8.866	22.705	188	tube
2	6	0	21.796	189	tube
2	6	0	21.213	190	tube
3	4	0	25.717	74	tube
3	4	0	24.765	75	tube
3	4	0	24.111	76	tube
3	4	0	23.671	77	tube
3	4	0	23.941	78	tube
3	4	0	23.628	79	tube
3	4	0	23.586	80	tube
3	4	0	22.421	81	tube
3	4	4.902	21.597	82	tube
3	4	7.062	21.412	83	tube
3	5	7.942	21.412	84	tube
3	5	8.156	22.193	85	tube
3	5	8.795	23.444	86	tube
3	5	10.258	23.685	87	tube
3	5	13.37	24.183	88	tube
3	6	14.961	24.083	89	tube
3	6	16.254	24.779	90	tube
3	6	17.675	26.072	91	tube
3	6	18.386	27.465	92	tube
3	6	18.982	28.317	93	tube
3	6	19.352	29.908	94	tube
3	6	20.9	30.448	95	tube
3	7	22.321	31.5	96	tube
3	7	23.628	32.011	97	tube
3	7	25.12	32.821	98	tube
3	7	26.996	35.364	99	tube
3	7	28.843	38.405	100	tube
3	7	30.42	39.883	101	tube
3	7	31.94	41.488	102	tube
3	7	33.162	41.914	103	tube
3	7	34.441	42.511	104	tube
3	7	35.691	43.307	105	tube
3	7	36.799	44.444	106	tube
3	7	38.249	44.998	107	tube
3	7	39.513	45.879	108	tube
3	7	40.323	46.816	109	tube
3	7	40.877	48.209	110	tube
3	7	41.275	48.635	111	tube
3	7	41.119	49.402	112	tube
3	7	39.613	48.564	113	tube
3	7	38.803	47.939	114	tube
3	7	39.414	47.811	115	tube
3	8	40.479	47.768	116	tube
3	8	41.602	48.976	117	tube
3	8	42.042	50.468	118	tube
3	8	41.843	49.743	119	tube
3	8	41.275	49.317	120	tube
3	8	40.707	48.493	121	tube
3	7	39.726	47.868	122	tube
3	7	38.49	48.365	123	tube
3	7	38.405	49.061	124	tube
3	7	38.05	47.91	125	tube
3	7	37.254	47.029	126	tube
3	7	35.663	46.347	127	tube
3	7	34.881	45.836	128	tube
3	7	33.787	44.259	129	tube
3	7	33.375	43.108	130	tube
3	7	32.963	43.321	131	tube
3	7	32.31	43.989	132	tube
3	7	32.295	43.463	133	tube
3	6	31.983	43.165	134	tube
3	6	29.965	40.195	135	tube
3	6	24.666	37.851	136	tube
3	6	0	36.672	137	tube
3	6	0	35.805	138	tube
3	6	0	32.026	139	tube
3	6	0	28.928	140	tube
3	6	0	28.715	141	tube
3	6	0	28.715	142	tube
3	5	0	26.584	143	tube
3	5	0	24.737	144	tube
3	5	0	24.012	145	tube
3	5	0	23.501	146	tube
4	7	0	15.743	74	tube
4	7	0	16.112	75	tube
4	7	0	16.737	76	tube
4	7	0	16.837	77	tube
4	7	0	17.547	78	tube
4	7	0	17.803	79	tube
4	7	0	18.087	80	tube
4	5	0	17.661	81	tube
4	5	0	17.775	82	tube
4	5	0	16.695	83	tube
4	5	0	16.212	84	tube
4	5	0	15.388	85	tube
4	5	0	15.16	86	tube
4	5	0	14.606	87	tube
4	5	0	14.18	88	tube
4	4	0	10.386	89	tube
4	4	0	8.07	90	tube
4	4	0	7.559	91	tube
4	4	0	7.246	92	tube
4	4	0	6.38	93	tube
4	4	0	5.882	94	tube
4	4	0	4.888	95	tube
4	4	0	4.064	96	tube
4	4	0	3.58	97	tube
4	4	0	3.225	98	tube
4	4	0	2.515	99	tube
4	4	0	2.032	100	tube
4	4	0	2.145	101	tube
4	4	0	2.302	102	tube
4	4	0	2.131	105	tube
4	5	0	2.529	106	tube
4	5	0	2.771	107	tube
4	5	0	3.026	108	tube
4	5	0	2.941	109	tube
4	5	0	3.012	110	tube
4	5	0	3.097	111	tube
4	5	0	3.382	112	tube
4	5	0	3.453	113	tube
4	5	0	3.921	114	tube
4	5	0	4.021	115	tube
4	5	0	4.106	116	tube
4	5	0	4.504	117	tube
4	5	0	4.973	118	tube
4	5	0	4.689	119	tube
4	5	0	4.66	120	tube
4	5	0	4.305	121	tube
4	5	0	4.262	122	tube
4	5	0	6.806	123	tube
4	5	2.97	11.722	124	tube
4	5	4.561	13.143	125	tube
4	5	5.385	15.729	126	tube
4	5	6.124	17.277	127	tube
4	6	7.672	19.636	128	tube
4	6	9.662	20.744	129	tube
4	6	11.821	22.549	130	tube
4	6	12.901	22.392	131	tube
4	6	13.356	22.421	132	tube
4	6	13.342	23.131	133	tube
4	6	13.299	24.467	134	tube
4	6	14.564	24.936	135	tube
4	6	15.942	25.689	136	tube
4	6	16.95	27.962	137	tube
4	6	17.86	31.415	138	tube
4	6	18.3	31.173	139	tube
4	6	18.499	31.557	140	tube
4	6	18.783	31.372	141	tube
4	6	19.295	31.542	142	tube
4	6	20.275	32.011	143	tube
4	6	21.398	33.034	144	tube
4	6	21.867	33.702	145	tube
4	6	21.938	34.981	146	tube
4	6	21.824	34.796	147	tube
4	6	21.668	34.682	148	tube
4	6	21.44	34.384	149	tube
4	6	21.369	34.071	150	tube
4	6	21.852	31.074	151	tube
4	6	22.293	28.658	152	tube
4	6	22.307	30.065	153	tube
4	6	21.781	31.841	154	tube
4	6	20.801	31.429	155	tube
4	6	19.892	30.903	156	tube
4	6	19.266	31.23	157	tube
4	6	18.201	31.983	158	tube
4	6	17.263	31.031	159	tube
4	6	16.411	30.335	160	tube
4	6	16.467	29.369	161	tube
4	6	16.823	28.616	162	tube
4	6	16.908	28.658	163	tube
4	6	16.652	28.715	164	tube
4	6	15.828	28.303	165	tube
4	6	14.663	28.104	166	tube
4	6	13.285	27.166	167	tube
4	6	11.466	26.896	168	tube
4	6	9.193	25.39	169	tube
4	6	7.175	23.969	170	tube
4	6	6.095	24.509	171	tube
4	6	5.214	24.921	172	tube
4	6	4.049	23.827	173	tube
4	6	2.302	23.088	174	tube
4	6	0	22.961	175	tube
4	6	0	22.549	176	tube
4	6	0	22.875	177	tube
4	6	0	23.273	178	tube
4	6	0	25.404	179	tube
4	6	0	29.354	180	tube
4	6	0	29.482	181	tube
4	6	0	29.639	182	tube
4	6	0	29.298	183	tube
4	6	0	29.084	184	tube
4	6	0	30.676	185	tube
4	6	0	32.864	186	tube
5	8	0	43.932	74	tube
5	8	0	44.06	75	tube
5	8	0	44.728	76	tube
5	8	0	46.333	77	tube
5	8	0	48.052	78	tube
5	8	0	46.546	79	tube
5	8	0	45.381	80	tube
5	8	0	44.301	81	tube
5	7	0	43.605	82	tube
5	7	0	42.142	83	tube
5	7	0	41.232	84	tube
5	7	0	39.542	85	tube
5	7	0	37.95	86	tube
5	7	0	36.942	87	tube
5	6	0	36.558	88	tube
5	6	0	36.203	89	tube
5	6	0	35.99	90	tube
5	6	0	34.143	91	tube
5	6	0	32.636	92	tube
5	6	0	30.733	93	tube
5	6	0	29.155	94	tube
5	6	0	30.221	95	tube
5	7	0	32.239	96	tube
5	7	0	30.662	97	tube
5	7	7.317	29.113	98	tube
5	7	12.177	29.695	99	tube
5	7	19.423	30.491	100	tube
5	7	18.883	28.601	101	tube
5	7	18.783	27.095	102	tube
5	7	19.721	27.209	103	tube
5	7	21.028	27.55	104	tube
5	7	20.218	26.626	105	tube
5	7	20.19	25.916	106	tube
5	7	20.645	25.973	107	tube
5	7	21.682	26.356	108	tube
5	7	21.042	25.206	109	tube
5	7	21.355	24.225	110	tube
5	7	21.199	24.538	111	tube
5	7	21.653	25.092	112	tube
5	7	20.289	24.751	113	tube
5	7	19.409	24.552	114	tube
5	6	18.783	24.268	115	tube
5	6	18.982	24.168	116	tube
5	6	19.948	24.978	117	tube
5	6	21.483	25.831	118	tube
5	6	19.963	24.836	119	tube
5	6	18.741	24.055	120	tube
5	6	19.991	24.85	121	tube
5	6	22.065	25.816	122	tube
5	6	21.625	26.157	123	tube
5	6	21.796	26.669	124	tube
5	5	21.767	26.541	125	tube
5	5	22.094	26.669	126	tube
5	5	22.392	26.839	127	tube
5	5	23.671	27.649	128	tube
5	5	23.117	27.82	129	tube
5	5	23.387	28.203	130	tube
5	5	22.392	28.189	131	tube
5	5	22.335	28.616	132	tube
5	5	22.662	29.894	133	tube
5	4	23.373	31.329	134	tube
5	4	23.572	31.159	135	tube
5	4	24.467	31.5	136	tube
5	4	23.898	31.898	137	tube
5	4	24.651	32.622	138	tube
5	4	24.893	33.077	139	tube
5	4	26.285	33.674	140	tube
5	4	25.561	33.134	141	tube
5	4	26.03	32.878	142	tube
5	4	26.3	33.887	143	tube
5	4	27.223	35.151	144	tube
5	4	25.66	34.086	145	tube
5	4	25.632	33.29	146	tube
5	4	25.404	33.02	147	tube
5	4	25.447	33.034	148	tube
5	4	24.467	32.722	149	tube
5	4	23.927	32.736	150	tube
5	4	24.197	31.841	151	tube
5	4	24.793	31.571	152	tube
5	4	23.827	31.372	153	tube
5	4	24.239	31.585	154	tube
5	5	23.756	31.216	155	tube
5	5	24.168	31.088	156	tube
5	5	23.358	30.761	157	tube
5	5	22.918	30.662	158	tube
5	5	22.62	30.718	159	tube
5	5	22.989	30.96	160	tube
5	6	21.426	29.298	161	tube
5	6	20.46	27.948	162	tube
5	6	19.394	25.944	163	tube
5	6	19.167	24.353	164	tube
5	6	18.13	23.486	165	tube
5	6	17.647	22.89	166	tube
5	6	16.794	23.231	167	tube
5	6	16.595	23.699	168	tube
5	6	0	23.628	169	tube
5	6	0	23.699	170	tube
5	6	0	23.273	171	tube
5	6	0	22.875	172	tube
5	5	0	23.16	173	tube
5	5	0	23.742	174	tube
5	5	0	23.074	175	tube
5	5	0	22.747	176	tube
5	5	0	23.117	177	tube
5	5	0	23.941	178	tube
5	5	0	24.083	179	tube
5	5	0	24.566	180	tube
5	5	0	24.225	181	tube
5	5	0	24.282	182	tube
5	5	0	23.955	183	tube
5	5	0	23.941	184	tube
6	6	0	20.318	76	tube
6	6	0	20.091	77	tube
6	6	0	20.19	78	tube
6	5	0	19.963	79	tube
6	5	0	19.934	80	tube
6	5	0	19.48	81	tube
6	5	0	19.195	82	tube
6	5	0	18.087	83	tube
6	5	0	17.291	84	tube
6	5	0	16.638	85	tube
6	5	0	16.34	86	tube
6	5	0	17.05	87	tube
6	5	0	17.988	88	tube
6	5	0	17.831	89	tube
6	5	0	17.888	90	tube
6	5	0	18.187	91	tube
6	5	0	18.869	92	tube
6	5	0	19.096	93	tube
6	5	0	19.551	94	tube
6	5	0	20.701	95	tube
6	5	10.67	22.264	96	tube
6	5	13.782	22.904	97	tube
6	5	15.189	24.069	98	tube
6	5	16.965	24.722	99	tube
6	5	18.485	25.76	100	tube
6	5	20.233	26.57	101	tube
6	5	21.114	27.763	102	tube
6	5	21.781	27.763	103	tube
6	5	21.994	27.948	104	tube
6	5	21.938	28.09	105	tube
6	5	22.009	28.644	106	tube
6	5	22.151	28.317	107	tube
6	5	22.222	28.473	108	tube
6	5	22.648	28.715	109	tube
6	5	23.543	29.44	110	tube
6	5	24.14	29.965	111	tube
6	5	25.12	30.576	112	tube
6	5	25.873	32.352	113	tube
6	5	26.513	34.881	114	tube
6	5	27.252	34.341	115	tube
6	5	27.664	34.086	116	tube
6	5	28.189	35.066	117	tube
6	5	28.53	36.487	118	tube
6	6	28.644	36.771	119	tube
6	6	28.942	37.325	120	tube
6	6	28.985	38.021	121	tube
6	6	29.127	39.002	122	tube
6	6	29.795	39.215	123	tube
6	6	30.434	39.741	124	tube
6	6	31.301	40.437	125	tube
6	6	32.196	41.403	126	tube
6	6	32.025	41.787	127	tube
6	6	31.358	42.284	128	tube
6	6	30.249	41.744	129	tube
6	6	28.687	41.289	130	tube
6	6	27.28	40.778	131	tube
6	6	26.101	40.693	132	tube
6	6	24.793	39.456	133	tube
6	6	23.415	38.391	134	tube
6	6	22.208	35.691	135	tube
6	6	21.213	33.389	136	tube
6	6	20.105	32.324	137	tube
6	5	17.817	31.685	138	tube
6	5	11.21	28.985	139	tube
6	5	4.39	26.797	140	tube
6	5	0	22.463	141	tube
6	5	0	18.641	142	tube
6	5	0	15.913	143	tube
6	5	0	13.953	144	tube
6	5	0	10.898	145	tube
6	5	0	8.894	146	tube
7	6	0	13.413	76	tube
7	6	0	14.095	77	tube
7	6	0	14.933	78	tube
7	6	0	15.032	79	tube
7	6	0	15.487	80	tube
7	6	0	15.231	81	tube
7	6	0	15.246	82	tube
7	6	0	15.231	83	tube
7	6	0	15.643	84	tube
7	6	0	14.535	85	tube
7	6	0	13.924	86	tube
7	5	0	13.484	87	tube
7	5	0	13.356	88	tube
7	5	0	12.574	89	tube
7	5	0	11.963	90	tube
7	5	0	11.807	91	tube
7	5	0	11.992	92	tube
7	5	0	11.764	93	tube
7	5	0	12.02	94	tube
7	5	0	11.495	95	tube
7	5	0	11.807	96	tube
7	5	0	11.921	97	tube
7	6	0	12.105	98	tube
7	6	0	12.177	99	tube
7	6	0	12.475	100	tube
7	6	0	11.907	101	tube
7	6	0	11.594	102	tube
7	6	0	11.764	103	tube
7	6	0	12.091	104	tube
7	6	0	10.528	105	tube
7	6	0	9.306	106	tube
7	6	0	10.77	107	tube
7	6	0	12.518	108	tube
7	6	0	11.31	109	tube
7	6	0	10.4	110	tube
7	6	0	9.861	111	tube
7	6	0	9.633	112	tube
7	6	0	10.216	113	tube
7	6	0	10.798	114	tube
7	6	0	11.281	115	tube
7	6	0	11.963	116	tube
7	5	0	12.162	117	tube
7	5	0	12.418	118	tube
7	5	0	11.949	119	tube
7	5	0	11.679	120	tube
7	4	0	9.491	121	tube
7	4	0	7.616	122	tube
7	4	0	4.22	123	tube
7	4	0	2.273	124	tube
7	4	0	3.353	138	tube
7	4	0	3.112	139	tube
7	4	0	3.14	140	tube
7	4	0	2.998	141	tube
7	5	0	3.041	142	tube
7	5	0	4.049	143	tube
7	5	0	5.2	144	tube
7	6	0	6.337	145	tube
7	6	0	7.545	146	tube
7	6	0	8.468	147	tube
7	6	0	9.889	148	tube
7	6	0	11.111	149	tube
7	6	0	12.574	150	tube
7	6	0	14.805	151	tube
7	6	7.701	17.547	152	tube
7	6	13.526	21.398	153	tube
7	6	17.817	25.987	154	tube
7	6	20.062	27.678	155	tube
7	6	21.895	29.596	156	tube
7	6	23.032	30.647	157	tube
7	6	24.239	31.94	158	tube
7	6	25.39	34.242	159	tube
7	6	27.01	36.871	160	tube
7	6	29.283	37.936	161	tube
7	6	30.846	39.385	162	tube
7	6	33.972	41.701	163	tube
7	6	36.558	44.458	164	tube
7	6	37.723	45.779	165	tube
7	6	38.462	47.285	166	tube
7	6	39.101	47.967	167	tube
7	6	40.479	49.047	168	tube
7	6	42.241	50.837	169	tube
7	6	43.79	52.755	170	tube
7	6	44.571	53.594	171	tube
7	6	46.134	54.887	172	tube
7	6	47.782	57.473	173	tube
7	6	49.459	60.584	174	tube
7	6	50.454	62.346	175	tube
7	6	51.903	64.42	176	tube
7	6	52.642	64.761	177	tube
7	6	53.025	64.918	178	tube
7	6	52.855	63.653	179	tube
7	6	51.448	62.545	180	tube
7	6	48.607	59.76	181	tube
7	6	45.836	58.112	182	tube
7	6	43.449	57.018	183	tube
7	6	39.698	56.421	184	tube
7	6	29.752	54.531	185	tube
7	6	19.252	53.04	186	tube
7	6	0	48.592	187	tube
7	6	0	45.04	188	tube
8	4	0	21.455	74	tube
8	4	0	21.867	75	tube
8	5	0	22.634	76	tube
8	5	0	22.222	77	tube
8	5	0	21.994	78	tube
8	5	0	21.824	79	tube
8	5	0	21.767	80	tube
8	5	0	21.156	81	tube
8	5	0	20.602	82	tube
8	5	0	21.028	83	tube
8	5	0	21.554	84	tube
8	5	0	21.653	85	tube
8	5	0	21.881	86	tube
8	5	0	21.838	87	tube
8	5	0	21.682	88	tube
8	5	0	21.796	89	tube
8	5	0	22.023	90	tube
8	5	0	21.256	91	tube
8	5	0	20.787	92	tube
8	5	0	20.673	93	tube
8	5	0	20.701	94	tube
8	5	0	20.261	95	tube
8	5	0	20.233	96	tube
8	5	0	19.281	97	tube
8	5	0	18.414	98	tube
8	5	0	17.533	99	tube
8	5	0	17.007	100	tube
8	5	0	16.126	101	tube
8	5	0	15.487	102	tube
8	5	0	14.279	103	tube
8	5	0	13.398	104	tube
8	5	0	11.253	105	tube
8	5	0	9.818	106	tube
8	5	0	9.377	107	tube
8	5	0	9.179	108	tube
8	5	0	8.852	109	tube
8	5	0	8.539	110	tube
8	5	0	8.653	111	tube
8	5	0	8.909	112	tube
8	5	0	8.909	113	tube
8	5	0	9.008	114	tube
8	6	0	9.122	115	tube
8	6	0	9.321	116	tube
8	6	0	9.221	117	tube
8	7	0	9.193	118	tube
8	7	0	9.96	119	tube
8	7	4.504	10.983	120	tube
8	7	6.337	11.196	121	tube
8	7	7.218	11.409	122	tube
8	7	7.587	12.006	123	tube
8	7	8.283	12.574	124	tube
8	7	8.994	13.626	125	tube
8	6	10.287	14.62	126	tube
8	6	11.21	15.842	127	tube
8	6	12.105	17.235	128	tube
8	6	13.327	18.13	129	tube
8	6	14.606	19.124	130	tube
8	6	15.7	20.503	131	tube
8	6	16.936	22.065	132	tube
8	6	17.718	23.074	133	tube
8	6	18.329	24.239	134	tube
8	6	18.599	24.623	135	tube
8	6	19.096	25.262	136	tube
8	6	19.906	25.475	137	tube
8	6	20.517	25.831	138	tube
8	6	20.872	26.072	139	tube
8	6	21.014	26.527	140	tube
8	6	21.213	27.195	141	tube
8	6	21.412	27.934	142	tube
8	6	22.122	28.218	143	tube
8	6	22.691	28.701	144	tube
8	6	22.804	30.122	145	tube
8	6	22.747	31.94	146	tube
8	6	22.975	31.685	147	tube
8	6	22.918	31.542	148	tube
8	6	22.534	32.551	149	tube
8	5	21.838	33.802	150	tube
8	5	20.247	28.928	151	tube
8	5	19.153	24.865	152	tube
8	5	19.281	26.129	153	tube
8	5	18.982	27.564	154	tube
8	5	18.087	24.367	155	tube
8	5	16.922	21.483	156	tube
8	5	16.567	21.185	157	tube
8	5	16.311	21.042	158	tube
8	5	16.681	21.81	159	tube
8	5	17.291	22.563	160	tube
8	5	17.675	23.401	161	tube
8	5	18.002	24.325	162	tube
8	5	18.613	24.296	163	tube
8	5	18.684	24.282	164	tube
8	5	19.181	25.475	165	tube
8	5	19.92	26.683	166	tube
8	5	20.815	27.095	167	tube
8	5	21.597	27.521	168	tube
8	5	22.478	28.445	169	tube
8	5	23.017	29.582	170	tube
8	5	23.415	29.255	171	tube
8	5	23.77	29.212	172	tube
8	5	24.225	30.136	173	tube
8	5	25.22	31.344	174	tube
8	6	26.03	33.475	175	tube
8	6	26.825	35.947	176	tube
8	6	27.067	36.16	177	tube
8	6	26.953	36.444	178	tube
8	6	26.726	36.103	179	tube
8	6	26.356	35.919	180	tube
8	6	25.39	38.021	181	tube
8	6	21.724	39.854	182	tube
9	5	0	25.873	72	tube
9	5	0	24.04	73	tube
9	5	0	22.492	74	tube
9	5	0	22.932	75	tube
9	5	0	23.557	76	tube
9	5	0	22.577	77	tube
9	5	0	21.781	78	tube
9	4	0	20.417	79	tube
9	4	0	19.295	80	tube
9	4	0	16.709	81	tube
9	4	0	14.677	82	tube
9	4	0	13.725	83	tube
9	4	0	13.086	84	tube
9	4	0	12.83	85	tube
9	4	0	12.688	86	tube
9	4	0	10.685	87	tube
9	4	0	8.752	88	tube
9	4	0	7.9	89	tube
9	4	0	7.587	90	tube
9	4	0	7.118	91	tube
9	4	0	6.735	92	tube
9	4	0	6.607	93	tube
9	4	0	6.536	94	tube
9	4	0	5.996	95	tube
9	5	0	5.982	96	tube
9	5	0	5.811	97	tube
9	5	0	5.939	98	tube
9	5	0	6.252	99	tube
9	5	0	6.721	100	tube
9	5	0	6.451	101	tube
9	5	0	6.99	102	tube
9	5	0	6.578	103	tube
9	5	0	6.152	104	tube
9	5	0	6.337	105	tube
9	5	0	6.635	106	tube
9	4	0	6.351	107	tube
9	4	0	6.181	108	tube
9	4	0	5.584	109	tube
9	4	0	5.2	110	tube
9	4	0	5.811	111	tube
9	4	0	6.777	112	tube
9	4	0	7.019	113	tube
9	4	0	7.474	114	tube
9	4	0	7.729	115	tube
9	4	0	9.349	116	tube
9	4	0	10.244	117	tube
9	4	0	11.75	118	tube
9	4	0	10.869	119	tube
9	4	0	10.23	120	tube
9	4	0	10.642	121	tube
9	4	0.781	11.196	122	tube
9	4	3.097	11.651	123	tube
9	4	5.357	12.333	124	tube
9	4	7.928	14.748	125	tube
9	4	10.656	18.016	126	tube
9	5	12.66	19.465	127	tube
9	5	14.791	21.199	128	tube
9	5	18.073	25.547	129	tube
9	5	21.526	31.798	130	tube
9	5	22.975	33.29	131	tube
9	5	24.282	35.009	132	tube
9	5	26.953	37.467	133	tube
9	5	29.383	40.281	134	tube
9	5	31.4	40.991	135	tube
9	5	32.509	42.085	136	tube
9	5	33.659	43.96	137	tube
9	5	35.08	46.163	138	tube
9	5	36.743	46.887	139	tube
9	5	38.817	47.768	140	tube
9	5	41.161	50.098	141	tube
9	5	43.037	52.755	142	tube
9	5	43.96	52.826	143	tube
9	5	44.6	53.21	144	tube
9	5	44.969	54.659	145	tube
9	5	44.642	56.364	146	tube
9	5	44.216	55.697	147	tube
9	5	43.705	55.384	148	tube
9	5	44.074	55.341	149	tube
9	5	44.714	55.512	150	tube
9	5	45.211	55.824	151	tube
9	5	45.367	56.222	152	tube
9	5	45.253	55.029	153	tube
9	5	45.04	53.878	154	tube
9	5	44.543	53.736	155	tube
9	5	44.074	53.963	156	tube
9	5	43.634	54.048	157	tube
9	5	43.733	54.261	158	tube
9	6	43.989	54.858	159	tube
9	6	44.529	55.654	160	tube
9	6	44.131	55.213	161	tube
9	6	43.421	54.986	162	tube
9	6	42.341	54.546	163	tube
9	6	40.891	54.333	164	tube
9	6	39.84	54.219	165	tube
9	6	38.959	54.304	166	tube
9	6	38.036	54.02	167	tube
9	6	36.97	53.849	168	tube
9	6	35.691	52.77	169	tube
9	6	33.475	52.088	170	tube
9	6	31.372	51.86	171	tube
9	6	29.17	52.301	172	tube
9	6	27.536	50.724	173	tube
9	6	25.674	49.516	174	tube
9	6	22.819	46.944	175	tube
9	6	19.21	44.77	176	tube
9	6	15.388	44.131	177	tube
9	6	10.244	43.577	178	tube
9	6	0	42.739	179	tube
9	6	0	42.142	180	tube
9	6	0	40.636	181	tube
9	6	0	39.428	182	tube
9	6	0	35.507	183	tube
9	6	0	32.935	184	tube
9	6	0	31.344	185	tube
9	6	0	29.937	186	tube
10	4	0	6.337	132	tube
10	4	0	5.953	133	tube
10	4	0	5.84	134	tube
10	5	0	6.166	135	tube
10	5	0	6.635	136	tube
10	5	0	6.763	137	tube
10	5	0	6.877	138	tube
10	5	0	7.317	139	tube
10	5	0	7.829	140	tube
10	5	0	8.568	141	tube
10	5	2.316	9.434	142	tube
10	5	4.845	10.969	143	tube
10	5	7.374	12.688	144	tube
10	6	8.738	13.583	145	tube
10	6	10.585	14.72	146	tube
10	6	12.503	16.936	147	tube
10	6	14.89	19.551	148	tube
10	6	16.581	21.611	149	tube
10	6	18.769	24.254	150	tube
10	6	19.991	26.399	151	tube
10	6	21.256	28.928	152	tube
10	6	22.577	30.093	153	tube
10	6	24.111	31.358	154	tube
10	6	26.243	34.228	155	tube
10	6	28.388	37.766	156	tube
10	6	29.639	38.803	157	tube
10	6	30.647	40.11	158	tube
10	6	31.827	40.849	159	tube
10	6	33.091	41.829	160	tube
10	6	35.435	43.037	161	tube
10	6	37.965	44.444	162	tube
10	6	39.513	46.902	163	tube
10	6	40.352	49.53	164	tube
10	6	40.465	49.189	165	tube
10	6	40.124	49.331	166	tube
10	6	39.94	49.971	167	tube
10	6	40.309	50.809	168	tube
10	6	41.318	51.079	169	tube
10	6	42.483	51.491	170	tube
10	6	42.156	51.803	171	tube
10	6	41.872	52.727	172	tube
10	6	42.383	53.594	173	tube
10	6	42.937	55	174	tube
10	6	43.421	54.83	175	tube
10	6	43.477	55.157	176	tube
10	6	43.278	55.526	177	tube
10	6	43.122	56.18	178	tube
10	6	43.25	56.989	179	tube
10	6	43.648	58.496	180	tube
10	6	44.543	60.84	181	tube
10	6	42.966	63.412	182	tube
10	6	0	65.287	183	tube
10	6	0	67.731	184	tube
11	4	0	22.094	74	tube
11	4	0	23.87	75	tube
11	4	0	26.214	76	tube
11	4	0	26.044	77	tube
11	4	0	26.47	78	tube
11	4	0	28.104	79	tube
11	4	0	30.036	80	tube
11	4	0	28.857	81	tube
11	4	0	27.99	82	tube
11	4	0	28.047	83	tube
11	4	0	28.445	84	tube
11	4	0	26.982	85	tube
11	4	0	25.902	86	tube
11	4	0	26.044	87	tube
11	4	0	26.74	88	tube
11	4	0	25.248	89	tube
11	4	0	24.168	90	tube
11	4	0	22.463	91	tube
11	4	0	21.213	92	tube
11	4	0	17.945	93	tube
11	4	0	15.174	94	tube
11	4	0	14.379	95	tube
11	4	0	13.839	96	tube
11	4	0	13.271	97	tube
11	4	0	12.759	98	tube
11	4	0	12.617	99	tube
11	4	0	12.83	100	tube
11	4	0	11.367	101	tube
11	4	0	10.287	102	tube
11	4	0	9.903	103	tube
11	4	0	9.562	104	tube
11	4	0	7.857	105	tube
11	4	0	6.664	106	tube
11	4	0	5.712	107	tube
11	4	0	4.959	108	tube
11	4	0	4.916	109	tube
11	4	0	4.944	110	tube
11	4	0	4.845	111	tube
11	4	0	4.788	112	tube
11	4	0	4.561	113	tube
11	4	0	4.561	114	tube
11	4	0	4.717	115	tube
11	4	0	4.731	116	tube
11	4	0	4.603	117	tube
11	4	0	4.532	118	tube
11	4	0	4.717	119	tube
11	4	0	4.973	120	tube
11	4	0	4.987	121	tube
11	4	0	5.016	122	tube
11	4	0	4.959	123	tube
11	4	0	5.001	124	tube
11	4	0	5.357	125	tube
11	4	0	5.626	126	tube
11	4	0	6.252	127	tube
11	4	0	7.033	128	tube
11	4	0	7.829	129	tube
11	4	0	8.795	130	tube
11	4	0	9.875	131	tube
11	4	0	11.637	132	tube
11	5	0	12.915	133	tube
11	5	6.308	14.535	134	tube
11	5	8.781	14.919	135	tube
11	5	10.585	15.402	136	tube
11	5	12.688	17.675	137	tube
11	5	15.203	20.019	138	tube
11	5	18.215	22.961	139	tube
11	6	21.114	26.513	140	tube
11	6	22.79	29.099	141	tube
11	6	24.296	32.48	142	tube
11	6	24.623	31.784	143	tube
11	6	25.206	31.4	144	tube
11	6	25.433	31.585	145	tube
11	6	25.589	31.869	146	tube
11	5	25.859	32.509	147	tube
11	5	26.044	33.347	148	tube
11	5	26.257	33.574	149	tube
11	5	26.726	33.858	150	tube
11	5	27.394	34.199	151	tube
11	5	27.45	34.697	152	tube
11	5	26.839	34.484	153	tube
11	5	26.001	34.682	154	tube
11	5	25.745	35.549	155	tube
11	5	25.22	36.643	156	tube
11	5	25.007	33.773	157	tube
11	5	24.978	31.287	158	tube
11	5	25.362	33.347	159	tube
11	5	25.959	35.833	160	tube
11	5	26.044	35.72	161	tube
11	5	25.745	36.018	162	tube
11	6	25.333	34.981	163	tube
11	6	25.049	34.427	164	tube
11	6	24.495	33.02	165	tube
11	6	23.799	32.153	166	tube
11	6	23.06	30.931	167	tube
11	6	22.023	30.278	168	tube
11	6	19.863	29.766	169	tube
11	6	18.045	29.113	170	tube
11	6	16.908	26.655	171	tube
11	6	16.141	24.58	172	tube
11	6	14.379	24.623	173	tube
11	6	11.978	25.177	174	tube
11	6	9.704	24.438	175	tube
11	6	7.829	23.842	176	tube
11	6	6.507	22.847	177	tube
11	6	5.626	22.094	178	tube
11	6	4.149	20.36	179	tube
11	6	2.259	18.869	180	tube
11	6	0	19.48	181	tube
11	6	0	20.659	182	tube
11	6	0	18.712	183	tube
11	6	0	17.121	184	tube
11	6	0	17.831	185	tube
11	6	0	18.812	186	tube
11	6	0	19.337	187	tube
11	6	0	20.147	188	tube
12	3	0	3.112	98	tube
12	3	0	3.595	99	tube
12	3	0	4.277	100	tube
12	3	0	4.518	101	tube
12	4	0	4.93	102	tube
12	4	0	5.058	103	tube
12	4	0	5.271	104	tube
12	4	0	5.555	105	tube
12	4	0	5.982	106	tube
12	4	0	6.948	107	tube
12	4	0	8.056	108	tube
12	4	0	8.88	109	tube
12	4	0	10.003	110	tube
12	4	0	10.216	111	tube
12	4	0	10.599	112	tube
12	4	0	10.685	113	tube
12	5	0	10.94	114	tube
12	5	0	13.001	115	tube
12	5	0	16.609	116	tube
12	5	0	17.505	117	tube
12	5	10.784	18.854	118	tube
12	5	16.283	22.208	119	tube
12	6	21.497	26.612	120	tube
12	6	27.706	33.574	121	tube
12	7	34.896	43.534	122	tube
12	7	37.766	45.964	123	tube
12	7	38.973	48.678	124	tube
12	7	39.329	49.601	125	tube
12	7	39.599	50.752	126	tube
12	7	40.835	52.514	127	tube
12	7	42.213	54.56	128	tube
12	7	44.316	54.773	129	tube
12	7	45.964	55.185	130	tube
12	7	46.603	55.441	131	tube
12	7	47.044	55.938	132	tube
12	7	47.456	56.705	133	tube
12	6	48.28	57.913	134	tube
12	6	48.848	58.155	135	tube
12	6	49.033	58.623	136	tube
12	6	48.479	57.373	137	tube
12	6	46.902	56.989	138	tube
12	6	45.481	55.057	139	tube
12	6	43.435	53.324	140	tube
12	6	42.696	52.429	141	tube
12	6	41.545	52.287	142	tube
12	6	40.167	50.425	143	tube
12	6	39.215	48.749	144	tube
12	6	37.737	47.342	145	tube
12	6	36.686	46.461	146	tube
12	6	35.649	44.586	147	tube
12	6	33.759	42.881	148	tube
12	6	31.457	40.266	149	tube
12	5	29.07	37.894	150	tube
12	5	27.72	35.99	151	tube
12	5	26.015	34.299	152	tube
12	5	23.898	31.102	153	tube
12	5	20.801	28.303	154	tube
12	5	18.655	25.731	155	tube
12	5	16.752	23.344	156	tube
12	5	14.478	21.54	157	tube
12	5	11.168	19.906	158	tube
12	5	6.777	18.201	159	tube
12	5	2.97	16.723	160	tube
12	5	0	15.8	161	tube
12	5	0	14.933	162	tube
12	5	0	14.18	163	tube
12	5	0	13.569	164	tube
12	5	0	13.526	165	tube
12	5	0	13.512	166	tube
12	5	0	13.015	167	tube
12	5	0	12.688	168	tube
12	5	0	12.617	169	tube
12	5	0	12.816	170	tube
12	4	0	12.859	171	tube
12	4	0	13.086	172	tube
12	4	0	12.631	173	tube
12	4	0	12.489	174	tube
12	4	0	12.518	175	tube
12	4	0	12.603	176	tube
12	4	0	13.143	177	tube
12	4	0	13.953	178	tube
12	4	0	14.933	179	tube
12	4	0	16.325	180	tube
12	4	0	18.485	181	tube
12	4	0	21.114	182	tube
12	4	0	20.858	183	tube
12	4	0	20.758	184	tube
13	5	0	14.421	78	tube
13	5	0	13.938	79	tube
13	5	0	13.754	80	tube
13	5	0	14.024	81	tube
13	5	0	14.464	82	tube
13	5	0	14.748	83	tube
13	5	0	15.444	84	tube
13	5	0	15.075	85	tube
13	5	0	14.833	86	tube
13	5	0	14.18	87	tube
13	5	0	14.024	88	tube
13	5	0	14.478	89	tube
13	5	0	15.174	90	tube
13	5	0	13.626	91	tube
13	6	0	12.603	92	tube
13	6	0	11.949	93	tube
13	6	0	11.452	94	tube
13	6	0	11.58	95	tube
13	6	0	11.85	96	tube
13	6	0	11.239	97	tube
13	6	0	10.642	98	tube
13	5	0	10.102	99	tube
13	5	0	9.79	100	tube
13	5	0	9.306	101	tube
13	5	0	9.036	102	tube
13	5	0	7.331	103	tube
13	5	0	6.01	104	tube
13	5	0	4.845	105	tube
13	5	0	4.234	106	tube
13	5	0	3.822	107	tube
13	5	0	3.751	108	tube
13	5	0	3.879	109	tube
13	5	0	3.879	110	tube
13	5	0	4.149	111	tube
13	5	0	4.348	112	tube
13	5	0	4.575	113	tube
13	5	0	4.973	114	tube
13	5	0	5.087	115	tube
13	5	0	5.314	116	tube
13	5	0	5.456	117	tube
13	5	0	5.641	118	tube
13	5	0	6.11	119	tube
13	5	0	6.763	120	tube
13	5	0	6.635	121	tube
13	5	0	6.848	122	tube
13	5	0	6.934	123	tube
13	5	0	7.275	124	tube
13	5	0	7.758	125	tube
13	5	0	8.34	126	tube
13	5	0	8.156	127	tube
13	5	0	8.184	128	tube
13	5	0	8.724	129	tube
13	5	0	9.477	130	tube
13	5	0	10.059	131	tube
13	5	4.831	10.898	132	tube
13	5	5.626	11.693	133	tube
13	5	7.346	12.589	134	tube
13	5	8.653	13.484	135	tube
13	6	10.145	14.336	136	tube
13	6	11.125	15.558	137	tube
13	6	12.745	16.737	138	tube
13	6	13.214	17.775	139	tube
13	6	14.606	18.897	140	tube
13	6	16.425	21.767	141	tube
13	6	18.272	25.206	142	tube
13	6	20.503	28.843	143	tube
13	6	24.509	33.347	144	tube
13	6	26.484	35.62	145	tube
13	6	28.218	37.922	146	tube
13	6	29.582	38.973	147	tube
13	6	31.67	40.124	148	tube
13	7	31.642	42.156	149	tube
13	7	32.779	44.515	150	tube
13	7	33.83	44.785	151	tube
13	7	35.663	45.339	152	tube
13	7	35.705	46.376	153	tube
13	7	35.677	47.711	154	tube
13	7	36.274	48.422	155	tube
13	7	37.212	49.402	156	tube
13	7	37.709	50.567	157	tube
13	7	39.4	52.173	158	tube
13	7	40.025	52.287	159	tube
13	7	40.92	52.528	160	tube
13	7	39.57	51.562	161	tube
13	7	38.774	50.88	162	tube
13	7	38.774	49.956	163	tube
13	7	39.13	49.487	164	tube
13	7	38.249	48.209	165	tube
13	7	37.965	47.711	166	tube
13	7	36.004	47.186	167	tube
13	7	34.782	46.916	168	tube
13	6	32.054	45.751	169	tube
13	6	29.34	44.983	170	tube
13	6	28.36	44.529	171	tube
13	6	27.791	44.159	172	tube
13	6	26.356	43.264	173	tube
13	6	25.745	42.781	174	tube
13	6	24.68	40.934	175	tube
13	6	24.154	39.101	176	tube
13	6	21.881	37.851	177	tube
13	6	20.247	36.785	178	tube
13	6	18.158	36.018	179	tube
13	6	16.752	35.507	180	tube
13	6	13.413	34.654	181	tube
13	6	11.182	33.986	182	tube
13	6	0	34.341	183	tube
13	6	0	34.81	184	tube
14	3	0	8.283	94	tube
14	3	0	8.227	95	tube
14	3	0	8.141	96	tube
14	4	0	7.573	97	tube
14	4	0	7.317	98	tube
14	4	0	8.312	99	tube
14	4	0	9.69	100	tube
14	4	0	9.917	101	tube
14	4	0	10.187	102	tube
14	4	0	9.889	103	tube
14	4	0	9.605	104	tube
14	4	0	9.335	105	tube
14	4	0	9.235	106	tube
14	4	0	8.695	107	tube
14	4	0	8.312	108	tube
14	4	0	7.63	109	tube
14	4	0	7.133	110	tube
14	4	0	6.792	111	tube
14	4	0	6.749	112	tube
14	4	0	6.266	113	tube
14	4	0	5.967	114	tube
14	4	0	5.769	115	tube
14	4	0	6.039	116	tube
14	4	0	5.854	117	tube
14	4	0	6.493	118	tube
14	4	0	7.488	119	tube
14	4	0	8.781	120	tube
14	4	0	8.568	121	tube
14	4	0	8.596	122	tube
14	4	0	8.511	123	tube
14	4	0	8.468	124	tube
14	4	0	8.184	125	tube
14	4	0	8.141	126	tube
14	4	0	8.07	127	tube
14	4	0	8.099	128	tube
14	4	0	8.681	129	tube
14	4	0	9.505	130	tube
14	4	0	9.235	131	tube
14	4	0	9.15	132	tube
14	4	0	9.164	133	tube
14	4	0	9.406	134	tube
14	4	0	8.823	135	tube
14	4	0	8.454	136	tube
14	4	0	8.568	137	tube
14	4	0	8.951	138	tube
14	4	0	8.312	139	tube
14	4	0	8.738	140	tube
14	4	0	9.861	141	tube
14	4	3.609	11.75	142	tube
14	4	6.11	13.469	143	tube
14	4	8.141	15.956	144	tube
14	4	9.321	16.538	145	tube
14	4	9.79	17.291	146	tube
14	4	10.599	18.016	147	tube
14	4	12.191	19.295	148	tube
14	5	13.583	19.75	149	tube
14	5	14.564	20.304	150	tube
14	5	15.743	21.383	151	tube
14	5	16.979	22.705	152	tube
14	5	18.329	23.557	153	tube
14	5	20.133	24.467	154	tube
14	5	21.085	25.632	155	tube
14	5	22.293	27.166	156	tube
14	5	22.719	27.706	157	tube
14	5	23.259	28.573	158	tube
14	6	24.495	30.193	159	tube
14	6	25.845	32.224	160	tube
14	6	27.01	33.404	161	tube
14	6	28.544	35.009	162	tube
14	6	29.908	37.212	163	tube
14	6	31.457	39.357	164	tube
14	6	33.915	41.062	165	tube
14	6	36.245	42.937	166	tube
14	6	37.979	44.657	167	tube
14	6	39.073	46.646	168	tube
14	6	40.195	48.095	169	tube
14	5	41.005	49.942	170	tube
14	5	41.929	50.354	171	tube
14	5	42.824	51.278	172	tube
14	5	44.088	52.429	173	tube
14	5	45.665	54.162	174	tube
14	5	47.2	54.773	175	tube
14	5	47.811	56.123	176	tube
14	5	47.896	55.043	177	tube
14	5	47.555	54.759	178	tube
14	6	46.944	54.432	179	tube
14	6	45.779	54.261	180	tube
14	6	43.25	52.841	181	tube
14	6	41.19	52.173	182	tube
14	6	38.377	51.96	183	tube
14	6	32.693	51.903	184	tube
15	4	0	18.485	80	tube
15	4	0	18.542	81	tube
15	4	0	18.798	82	tube
15	4	0	18.627	83	tube
15	4	0	18.499	84	tube
15	4	0	17.902	85	tube
15	4	0	17.746	86	tube
15	4	0	18.087	87	tube
15	4	0	18.485	88	tube
15	4	0	18.045	89	tube
15	4	0	17.917	90	tube
15	4	0	18.016	91	tube
15	4	0	18.258	92	tube
15	4	0	18.556	93	tube
15	4	0	18.798	94	tube
15	4	0	16.823	95	tube
15	4	0	15.43	96	tube
15	4	0	8.88	97	tube
15	4	0	8.553	98	tube
15	4	0	5.967	99	tube
15	4	0	4.22	100	tube
15	4	0	4.362	101	tube
15	4	0	4.888	102	tube
15	4	0	5.413	103	tube
15	4	0	6.209	104	tube
15	4	0	5.371	105	tube
15	4	0	4.76	106	tube
15	4	0	4.916	107	tube
15	4	0	5.058	108	tube
15	4	0	5.058	109	tube
15	4	0	5.186	110	tube
15	4	0	5.314	111	tube
15	4	0	5.47	112	tube
15	4	0	5.84	113	tube
15	4	0	6.38	114	tube
15	4	0	7.303	115	tube
15	4	1.378	8.198	116	tube
15	4	3.154	8.156	117	tube
15	4	3.751	8.156	118	tube
15	4	4.362	8.866	119	tube
15	4	5.328	9.591	120	tube
15	4	6.365	11.154	121	tube
15	4	7.53	13.1	122	tube
15	5	8.667	14.578	123	tube
15	5	10.059	16.24	124	tube
15	5	11.907	18.016	125	tube
15	5	13.498	20.062	126	tube
15	5	15.317	20.261	127	tube
15	5	16.297	20.773	128	tube
15	5	18.457	23.188	129	tube
15	5	20.744	25.859	130	tube
15	6	22.847	26.982	131	tube
15	6	25.277	28.388	132	tube
15	6	28.317	33.247	133	tube
15	6	31.699	39.357	134	tube
15	6	34.555	41.744	135	tube
15	6	37.155	44.5	136	tube
15	7	38.76	45.623	137	tube
15	7	39.712	46.916	138	tube
15	7	40.011	46.774	139	tube
15	7	39.599	46.816	140	tube
15	7	38.647	46.93	141	tube
15	7	38.05	47.2	142	tube
15	7	37.51	46.092	143	tube
15	6	37.013	45.58	144	tube
15	6	36.302	45.481	145	tube
15	6	35.762	45.651	146	tube
15	6	34.398	43.534	147	tube
15	5	33.574	41.858	148	tube
15	5	32.139	40.891	149	tube
15	5	30.647	39.996	150	tube
15	5	29.17	38.291	151	tube
15	5	28.445	36.842	152	tube
15	5	27.166	34.782	153	tube
15	5	25.674	33.02	154	tube
15	5	24.609	30.889	155	tube
15	4	23.202	29.056	156	tube
15	4	22.037	27.919	157	tube
15	4	20.886	26.996	158	tube
15	4	18.954	24.538	159	tube
15	4	16.269	22.52	160	tube
15	4	14.024	20.645	161	tube
15	4	12.134	18.982	162	tube
15	4	9.875	17.86	163	tube
15	5	7.843	17.007	164	tube
15	5	6.28	15.999	165	tube
15	5	3.936	15.231	166	tube
15	6	0	14.777	167	tube
15	6	0	14.436	168	tube
15	6	0	14.492	169	tube
15	6	0	14.677	170	tube
15	6	0	14.45	171	tube
15	6	0	14.677	172	tube
15	6	0	14.777	173	tube
15	6	0	15.061	174	tube
15	6	0	15.373	175	tube
15	5	0	16.212	176	tube
15	5	0	16.453	177	tube
15	5	0	16.993	178	tube
15	5	0	17.704	179	tube
15	5	0	18.57	180	tube
16	7	0	51.619	78	tube
16	7	0	51.676	79	tube
16	7	0	51.562	80	tube
16	7	0	51.917	81	tube
16	7	0	52.471	82	tube
16	7	0	52.954	83	tube
16	7	0	53.665	84	tube
16	7	0	53.565	85	tube
16	7	0	53.821	86	tube
16	7	0	52.684	87	tube
16	7	0	52.329	88	tube
16	7	0	55.256	89	tube
16	7	0	58.837	90	tube
16	7	0	58.481	91	tube
16	7	0	58.652	92	tube
16	7	0	59.22	93	tube
16	7	0	59.973	94	tube
16	7	0	55.597	95	tube
16	6	0	51.676	96	tube
16	6	0	42.653	97	tube
16	6	0	34.611	98	tube
16	6	0	32.125	99	tube
16	6	0	29.425	100	tube
16	6	0	28.459	101	tube
16	6	0	27.55	102	tube
16	6	0	22.634	103	tube
16	6	0	18.826	104	tube
16	6	0	19.465	105	tube
16	6	0	20.275	106	tube
16	6	0	20.346	107	tube
16	6	0	20.545	108	tube
16	6	0	22.321	109	tube
16	6	0	24.751	110	tube
16	6	0	29.07	111	tube
16	6	0	33.944	112	tube
16	6	0	34.569	113	tube
16	6	0	35.421	114	tube
16	6	0	36.956	115	tube
16	6	0	39.03	116	tube
16	6	0	39.016	117	tube
16	6	33.077	39.329	118	tube
16	6	39.599	46.362	119	tube
16	6	43.676	54.801	120	tube
16	6	46.731	56.265	121	tube
16	6	49.885	58.254	122	tube
16	6	50.88	59.064	123	tube
16	6	51.519	60.243	124	tube
16	6	50.525	59.121	125	tube
16	6	49.942	58.368	126	tube
16	6	48.862	57.515	127	tube
16	6	47.783	57.046	128	tube
16	6	46.816	55.924	129	tube
16	6	46.191	55.1	130	tube
16	7	45.197	54.134	131	tube
16	7	44.131	53.537	132	tube
16	7	42.838	51.917	133	tube
16	7	41.929	50.553	134	tube
16	7	40.664	49.516	135	tube
16	7	39.385	48.678	136	tube
16	7	37.112	47.768	137	tube
16	7	34.682	47.427	138	tube
16	7	31.116	45.509	139	tube
16	7	27.777	43.96	140	tube
16	6	26.371	41.716	141	tube
16	6	25.376	39.996	142	tube
16	6	25.333	38.49	143	tube
16	6	25.021	37.524	144	tube
16	6	23.913	35.166	145	tube
16	6	22.676	33.233	146	tube
16	6	21.668	31.827	147	tube
16	6	20.574	30.718	148	tube
16	6	19.92	29.454	149	tube
16	6	19.551	28.317	150	tube
16	6	19.323	27.521	151	tube
16	6	19.423	26.783	152	tube
16	6	18.954	25.973	153	tube
16	6	18.769	25.248	154	tube
16	6	18.158	24.055	155	tube
16	6	17.405	23.16	156	tube
16	6	16.382	22.52	157	tube
16	6	15.856	22.094	158	tube
16	6	15.075	20.858	159	tube
16	6	13.938	19.607	160	tube
16	6	12.034	19.139	161	tube
16	6	8.752	18.727	162	tube
16	6	0	17.931	163	tube
16	6	0	17.149	164	tube
16	6	0	17.419	165	tube
16	6	0	18.272	166	tube
16	6	0	17.419	167	tube
16	6	0	16.865	168	tube
16	6	0	18.172	169	tube
16	6	0	19.522	170	tube
16	6	0	20.844	171	tube
16	6	0	22.819	172	tube
16	6	0	24.893	173	tube
16	6	0	27.138	174	tube
16	6	0	28.601	175	tube
16	6	0	30.832	176	tube
16	7	0	30.619	177	tube
16	7	0	30.662	178	tube
16	7	0	31.443	179	tube
16	7	0	32.452	180	tube
16	7	0	33.915	181	tube
16	7	0	35.606	182	tube
16	7	0	36.274	183	tube
16	7	0	37.212	184	tube
17	6	0	26.257	74	tube
17	6	0	26.385	75	tube
17	6	0	26.683	76	tube
17	6	0	26.911	77	tube
17	6	0	27.379	78	tube
17	6	0	26.74	79	tube
17	6	0	26.768	80	tube
17	6	0	27.095	81	tube
17	6	0	27.536	82	tube
17	6	0	27.053	83	tube
17	6	0	26.911	84	tube
17	6	0	25.76	85	tube
17	6	0	24.907	86	tube
17	6	0	25.348	87	tube
17	6	0	25.902	88	tube
17	6	0	24.921	89	tube
17	6	0	24.254	90	tube
17	6	0	17.306	91	tube
17	6	0	14.635	92	tube
17	6	0	13.001	93	tube
17	5	0	11.85	94	tube
17	5	0	11.566	95	tube
17	5	0	11.452	96	tube
17	5	0	11.978	97	tube
17	5	0	13.001	98	tube
17	5	0	11.907	99	tube
17	5	0	11.097	100	tube
17	5	0	11.622	101	tube
17	5	0	12.333	102	tube
17	5	0	11.821	103	tube
17	5	0	11.551	104	tube
17	5	0	11.409	105	tube
17	5	0	11.352	106	tube
17	5	0	11.523	107	tube
17	5	0	12.205	108	tube
17	5	0	13.839	109	tube
17	5	0	16.34	110	tube
17	5	0	16.34	111	tube
17	5	0	16.553	112	tube
17	5	0	17.334	113	tube
17	5	0	18.57	114	tube
17	5	0	19.323	115	tube
17	5	10.599	20.048	116	tube
17	5	13.981	21.767	117	tube
17	5	16.524	23.714	118	tube
17	5	20.076	26.683	119	tube
17	5	23.927	29.766	120	tube
17	5	25.873	30.931	121	tube
17	5	28.189	32.452	122	tube
17	5	29.596	34.64	123	tube
17	5	30.69	37.197	124	tube
17	5	30.903	36.629	125	tube
17	5	31.017	36.288	126	tube
17	5	31.841	38.064	127	tube
17	5	32.196	40.238	128	tube
17	5	31.685	40.891	129	tube
17	5	30.917	41.801	130	tube
17	5	30.534	40.153	131	tube
17	5	30.889	38.931	132	tube
17	6	30.832	36.43	133	tube
17	6	31.329	34.412	134	tube
17	6	33.617	38.291	135	tube
17	6	36.601	42.554	136	tube
17	6	37.652	43.207	137	tube
17	6	37.709	43.96	138	tube
17	6	37.894	44.216	139	tube
17	6	38.05	44.714	140	tube
17	6	39.016	45.197	141	tube
17	7	39.826	45.893	142	tube
17	7	40.678	45.04	143	tube
17	7	41.176	44.543	144	tube
17	7	40.891	44.188	145	tube
17	7	39.868	44.117	146	tube
17	7	39.556	43.932	147	tube
17	8	39.613	44.017	148	tube
17	8	40.366	45.296	149	tube
17	8	40.835	46.632	150	tube
17	8	40.323	45.296	151	tube
17	8	39.684	43.989	152	tube
17	8	39.641	45.609	153	tube
17	8	39.286	47.498	154	tube
17	8	38.576	45.765	155	tube
17	7	37.595	44.316	156	tube
17	7	36.956	44.33	157	tube
17	7	36.061	44.358	158	tube
17	7	35.265	43.691	159	tube
17	7	33.674	43.136	160	tube
17	7	31.997	42.085	161	tube
17	7	29.482	41.36	162	tube
17	7	26.896	39.073	163	tube
17	7	24.396	37.325	164	tube
17	7	22.25	36.018	165	tube
17	7	20.687	34.91	166	tube
17	7	18.172	32.281	167	tube
17	7	15.785	30.051	168	tube
17	7	12.915	26.982	169	tube
17	7	9.093	24.282	170	tube
17	7	0	23.699	171	tube
17	7	0	23.216	172	tube
17	7	0	21.312	173	tube
17	7	0	19.636	174	tube
18	4	0	9.974	78	tube
18	4	0	10.059	79	tube
18	4	0	10.4	80	tube
18	4	0	9.889	81	tube
18	4	0	9.619	82	tube
18	4	0	10.571	83	tube
18	4	0	11.978	84	tube
18	4	0	12.034	85	tube
18	4	0	12.361	86	tube
18	4	0	12.347	87	tube
18	4	0	12.518	88	tube
18	4	0	11.921	89	tube
18	4	0	11.651	90	tube
18	4	0	13.441	91	tube
18	4	0	15.8	92	tube
18	4	0	16.666	93	tube
18	4	0	17.718	94	tube
18	5	0	17.718	95	tube
18	5	0	17.718	96	tube
18	5	0	18.854	97	tube
18	6	0	20.247	98	tube
18	6	0	21.312	99	tube
18	6	0	22.776	100	tube
18	6	0	24.083	101	tube
18	6	0	26.2	102	tube
18	6	0	25.973	103	tube
18	6	19.053	27.408	104	tube
18	6	22.208	27.408	105	tube
18	6	23.756	27.408	106	tube
18	6	27.067	33.347	107	tube
18	6	30.832	40.153	108	tube
18	6	33.759	41.943	109	tube
18	6	35.492	44.273	110	tube
18	6	36.885	43.122	111	tube
18	6	37.325	42.327	112	tube
18	6	37.68	43.492	113	tube
18	6	38.178	44.898	114	tube
18	6	37.822	45.339	115	tube
18	6	37.396	46.134	116	tube
18	6	36.558	45.893	117	tube
18	6	35.933	45.879	118	tube
18	6	35.08	44.628	119	tube
18	6	34.469	43.52	120	tube
18	5	33.816	41.346	121	tube
18	5	33.12	39.584	122	tube
18	5	31.883	39.201	123	tube
18	5	30.846	39.3	124	tube
18	5	29.369	36.998	125	tube
18	5	27.294	35.038	126	tube
18	5	24.282	32.977	127	tube
18	5	20.744	31.415	128	tube
18	5	16.681	27.848	129	tube
18	4	13.512	24.893	130	tube
18	4	11.21	22.179	131	tube
18	4	8.241	20.048	132	tube
18	4	0	16.709	133	tube
18	4	0	13.754	134	tube
18	4	0	11.523	135	tube
18	4	0	9.747	136	tube
18	4	0	8.553	137	tube
18	4	0	7.687	138	tube
18	4	0	7.601	139	tube
18	4	0	7.729	140	tube
18	4	0	7.388	141	tube
18	4	0	7.246	142	tube
18	4	0	6.593	143	tube
18	4	0	6.095	144	tube
18	4	0	6.294	145	tube
18	4	0	6.721	146	tube
18	4	0	6.024	147	tube
18	4	0	5.584	148	tube
18	4	0	4.362	149	tube
18	4	0	3.538	150	tube
18	4	0	3.708	151	tube
18	4	0	3.921	152	tube
18	4	0	3.467	153	tube
18	4	0	3.154	154	tube
18	4	0	3.211	155	tube
18	4	0	3.382	156	tube
18	4	0	3.538	157	tube
18	4	0	3.964	158	tube
18	4	0	3.68	159	tube
18	4	0	3.538	160	tube
18	4	0	3.623	161	tube
18	4	0	3.865	162	tube
18	4	0	3.637	163	tube
18	4	0	3.836	164	tube
18	4	0	4.305	165	tube
18	4	0	5.186	166	tube
18	4	0	5.001	167	tube
18	4	0	4.916	168	tube
18	4	0	5.712	169	tube
18	4	0	6.82	170	tube
18	4	0	6.039	171	tube
18	4	0	5.357	172	tube
18	4	0	5.172	173	tube
18	4	0	5.115	174	tube
19	7	0	27.109	78	tube
19	7	0	26.868	79	tube
19	7	0	26.598	80	tube
19	7	0	27.124	81	tube
19	7	0	27.877	82	tube
19	7	0	27.337	83	tube
19	7	0	27.067	84	tube
19	7	0	27.422	85	tube
19	7	0	28.132	86	tube
19	7	0	28.374	87	tube
19	7	12.319	29.042	88	tube
19	7	16.851	31.386	89	tube
19	7	19.963	34.242	90	tube
19	7	22.89	35.535	91	tube
19	7	25.291	36.97	92	tube
19	7	26.754	36.117	93	tube
19	7	28.218	36.018	94	tube
19	7	29.283	36.871	95	tube
19	7	30.86	38.263	96	tube
19	7	32.295	39.513	97	tube
19	7	33.247	41.062	98	tube
19	7	33.745	41.048	99	tube
19	7	33.745	41.431	100	tube
19	7	34.228	41.062	101	tube
19	6	34.526	41.375	102	tube
19	6	35.45	43.435	103	tube
19	6	36.331	45.751	104	tube
19	6	37.098	46.504	105	tube
19	6	37.425	47.711	106	tube
19	6	37.254	47.399	107	tube
19	6	36.871	47.356	108	tube
19	6	37.339	47.2	109	tube
19	6	37.439	47.427	110	tube
19	6	37.553	46.859	111	tube
19	6	37.183	46.76	112	tube
19	6	36.899	45.893	113	tube
19	6	36.743	45.552	114	tube
19	6	36.373	45.268	115	tube
19	6	35.776	45.126	116	tube
19	6	34.341	42.469	117	tube
19	6	33.233	40.167	118	tube
19	6	32.963	40.025	119	tube
19	6	32.764	40.224	120	tube
19	6	32.153	38.419	121	tube
19	6	31.017	36.828	122	tube
19	6	30.122	36.075	123	tube
19	6	28.644	35.62	124	tube
19	6	26.47	34.498	125	tube
19	6	24.111	33.588	126	tube
19	6	22.25	31.798	127	tube
19	6	20.36	30.377	128	tube
19	6	17.661	27.934	129	tube
19	5	13.697	25.703	130	tube
19	5	0	23.685	131	tube
19	5	0	22.009	132	tube
19	5	0	19.821	133	tube
19	5	0	17.931	134	tube
19	5	0	15.956	135	tube
19	5	0	14.379	136	tube
19	5	0	13.37	137	tube
19	4	0	12.816	138	tube
19	4	0	10.955	139	tube
19	4	0	9.505	140	tube
19	4	0	9.406	141	tube
19	4	0	9.605	142	tube
19	4	0	7.687	143	tube
19	4	0	5.939	144	tube
19	4	0	5.186	145	tube
19	4	0	5.598	146	tube
19	4	0	5.072	147	tube
19	4	0	4.717	148	tube
19	4	0	4.547	149	tube
19	4	0	4.888	150	tube
19	4	0	4.547	151	tube
19	4	0	4.561	152	tube
19	4	0	4.248	153	tube
19	4	0	4.035	154	tube
19	4	0	3.978	155	tube
19	4	0	4.476	156	tube
19	4	0	5.456	157	tube
19	4	0	6.692	158	tube
19	4	0	6.323	159	tube
19	4	0	6.408	160	tube
19	4	0	6.252	161	tube
19	4	0	6.223	162	tube
19	4	0	6.834	163	tube
19	4	0	7.871	164	tube
19	4	0	8.624	165	tube
19	4	0	9.804	166	tube
19	4	0	10.045	167	tube
19	4	0	10.443	168	tube
19	4	0	10.813	169	tube
19	4	0	11.537	170	tube
19	4	0	11.85	171	tube
19	4	0	12.404	172	tube
20	6	30.477	26.967	76	tube
20	6	34.952	39.101	77	tube
20	7	36.089	45.438	78	tube
20	7	37.368	51.221	79	tube
20	7	38.661	56.009	80	tube
20	7	39.542	61.309	81	tube
20	7	40.92	65.344	82	tube
20	7	43.293	68.271	83	tube
20	7	46.703	70.246	84	tube
20	7	49.9	73.016	85	tube
20	7	53.352	76.213	86	tube
20	7	56.606	78.387	87	tube
20	7	59.391	80.774	88	tube
20	7	61.778	82.579	89	tube
20	7	64.023	84.582	90	tube
20	7	66.395	86.301	91	tube
20	7	68.555	88.347	92	tube
20	7	69.038	89.839	93	tube
20	7	69.067	90.45	94	tube
20	7	67.717	91.018	95	tube
20	7	66.282	91.53	96	tube
20	7	64.435	91.104	97	tube
20	7	62.474	90.109	98	tube
20	7	58.282	88.987	99	tube
20	7	53.494	86.514	100	tube
20	7	48.82	84.397	101	tube
20	7	44.912	80.348	102	tube
20	7	40.735	73.357	103	tube
20	7	38.235	66.054	104	tube
20	7	37.553	61.806	105	tube
20	7	37.297	58.879	106	tube
20	6	36.984	56.165	107	tube
20	6	36.473	54.46	108	tube
20	6	36.416	52.471	109	tube
20	6	36.359	49.672	110	tube
20	6	36.203	47.655	111	tube
20	6	35.762	45.864	112	tube
20	5	35.478	43.25	113	tube
20	5	34.313	41.545	114	tube
20	4	32.168	39.513	115	tube
20	4	29.084	36.814	116	tube
20	4	24.325	34.199	117	tube
20	4	17.32	31.344	118	tube
20	4	0	28.587	119	tube
20	4	0	26.2	120	tube
20	4	0	23.643	121	tube
20	4	0	22.108	122	tube
20	4	0	20.218	123	tube
20	4	0	18.599	124	tube
20	4	0	17.775	125	tube
20	4	0	16.368	126	tube
20	4	0	15.814	127	tube
20	4	0	14.365	128	tube
20	4	0	13.242	129	tube
20	4	0	12.66	130	tube
20	4	0	12.532	131	tube
20	4	0	12.347	132	tube
20	4	0	12.006	133	tube
20	4	0	11.836	134	tube
20	4	0	11.665	135	tube
20	4	0	11.068	136	tube
20	4	0	8.141	137	tube
20	4	0	2.06	138	tube
21	7	0	16.467	86	tube
21	7	0	16.325	87	tube
21	7	0	16.439	88	tube
21	7	0	16.496	89	tube
21	7	0	16.894	90	tube
21	7	0	15.558	91	tube
21	6	0	14.564	92	tube
21	6	0	13.526	93	tube
21	6	0	12.944	94	tube
21	6	0	9.861	95	tube
21	5	0	7.431	96	tube
21	5	0	6.962	97	tube
21	5	0	6.522	98	tube
21	5	0	6.649	99	tube
21	5	0	6.863	100	tube
21	5	0	6.323	101	tube
21	5	0	5.939	102	tube
21	4	0	4.731	103	tube
21	4	0	4.12	104	tube
21	4	0	2.032	134	tube
21	4	0	2.089	137	tube
21	4	0	2.359	138	tube
21	4	0	2.529	139	tube
21	4	0	2.913	140	tube
21	4	0	2.927	141	tube
21	4	0	3.083	142	tube
21	4	0	2.941	143	tube
21	4	0	2.898	144	tube
21	4	0	3.993	145	tube
21	4	0	5.399	146	tube
21	4	0	4.888	147	tube
21	4	0	4.504	148	tube
21	4	0	4.916	149	tube
21	4	0	5.428	150	tube
21	4	0	6.635	151	tube
21	4	0	8.34	152	tube
21	4	0	8.809	153	tube
21	4	0	9.449	154	tube
21	5	0	9.52	155	tube
21	5	0	10.159	156	tube
21	5	0	10.258	157	tube
21	5	0	10.585	158	tube
21	5	0	15.473	159	tube
21	5	0	21.469	160	tube
21	5	0	22.549	161	tube
21	5	0	23.998	162	tube
21	5	0	20.304	163	tube
21	5	0	17.22	164	tube
21	5	0	16.297	165	tube
21	5	0	15.771	166	tube
21	5	0	17.647	167	tube
21	5	19.735	26.939	168	tube
21	6	25.547	31.642	169	tube
21	6	34.285	38.504	170	tube
21	6	34.171	39.215	171	tube
21	6	34.654	40.309	172	tube
21	6	34.441	41.275	173	tube
21	6	35.137	42.554	174	tube
21	6	33.986	43.463	175	tube
21	6	33.247	44.6	176	tube
21	6	32.551	43.435	177	tube
21	6	32.494	42.525	178	tube
21	6	31.67	42.355	179	tube
21	6	32.281	42.412	180	tube
21	6	31.599	41.943	181	tube
21	6	31.841	41.957	182	tube
21	6	30.448	41.716	183	tube
21	6	30.193	41.9	184	tube
21	6	28.871	40.579	185	tube
21	6	27.834	39.797	186	tube
21	6	26.186	36.629	187	tube
21	6	25.063	33.986	188	tube
21	6	24.452	32.85	189	tube
21	6	24.481	31.912	190	tube
21	6	24.921	32.565	191	tube
21	6	25.902	33.546	192	tube
21	6	25.12	31.145	193	tube
21	6	25.12	29.113	194	tube
21	6	21.341	27.891	195	tube
21	6	19.281	27.038	196	tube
21	6	0	26.598	197	tube
21	6	0	26.413	198	tube
22	6	0	69.351	70	tube
22	6	0	70.53	71	tube
22	6	0	72.107	72	tube
22	6	0	69.535	73	tube
22	6	0	67.177	74	tube
22	6	0	64.975	75	tube
22	6	0	63.184	76	tube
22	6	0	63.213	77	tube
22	6	0	64.108	78	tube
22	6	0	63.27	79	tube
22	6	0	63.014	80	tube
22	6	0	62.659	81	tube
22	6	0	62.715	82	tube
22	6	0	62.602	83	tube
22	7	0	62.772	84	tube
22	7	0	57.828	85	tube
22	7	0	53.082	86	tube
22	7	0	43.165	87	tube
22	7	0	35.194	88	tube
22	7	0	24.353	89	tube
22	7	6.337	19.252	90	tube
22	6	8.184	17.846	91	tube
22	6	8.013	16.681	92	tube
22	6	7.573	15.416	93	tube
22	6	6.735	14.379	94	tube
22	6	5.84	13.825	95	tube
22	6	3.993	13.512	96	tube
22	6	0	12.759	97	tube
22	6	0	12.177	98	tube
22	6	0	10.315	99	tube
22	6	0	8.823	100	tube
23	6	0	23.714	82	tube
23	6	0	23.472	83	tube
23	6	0	23.344	84	tube
23	6	0	23.699	85	tube
23	6	0	24.495	86	tube
23	7	0	23.756	87	tube
23	7	0	23.529	88	tube
23	7	0	23.586	89	tube
23	7	0	24.097	90	tube
23	7	0	23.16	91	tube
23	7	0	22.492	92	tube
23	7	0	23.685	93	tube
23	7	8.738	26.157	94	tube
23	7	15.146	32.551	95	tube
23	7	22.279	40.806	96	tube
23	7	27.976	42.682	97	tube
23	7	32.48	45.467	98	tube
23	7	35.066	46.205	99	tube
23	7	36.444	46.973	100	tube
23	7	36.558	46.688	101	tube
23	7	36.174	46.745	102	tube
23	7	35.848	46.063	103	tube
23	8	35.72	45.396	104	tube
23	8	35.677	46.234	105	tube
23	8	36.345	47.413	106	tube
23	8	37.212	47.882	107	tube
23	8	37.851	48.749	108	tube
23	8	37.212	47.939	109	tube
23	8	36.473	47.271	110	tube
23	8	36.189	48.01	111	tube
23	7	35.862	49.587	112	tube
23	7	35.549	48.195	113	tube
23	7	34.498	47.115	114	tube
23	7	33.404	48.024	115	tube
23	7	32.835	49.317	116	tube
23	7	33.361	48.962	117	tube
23	7	34.029	49.175	118	tube
23	7	33.873	48.024	119	tube
23	6	33.318	47.143	120	tube
23	6	33.674	46.49	121	tube
23	6	33.418	46.276	122	tube
23	6	33.574	46.703	123	tube
23	6	33.389	47.299	124	tube
23	6	32.381	46.561	125	tube
23	6	30.69	45.85	126	tube
23	6	28.9	44.458	127	tube
23	6	25.419	43.506	128	tube
23	6	16.78	41.09	129	tube
23	6	9.917	39.073	130	tube
23	6	6.692	37.78	131	tube
23	6	3.893	36.558	132	tube
23	6	0	36.53	133	tube
23	6	0	36.416	134	tube
23	5	0	36.601	135	tube
23	5	0	36.785	136	tube
23	5	0	34.341	137	tube
23	5	0	32.366	138	tube
23	5	0	31.23	139	tube
23	5	0	30.448	140	tube
23	5	0	26.754	141	tube
23	5	0	23.032	142	tube
23	5	0	23.216	143	tube
23	5	0	23.486	144	tube
23	5	0	21.526	145	tube
23	5	0	19.664	146	tube
23	5	0	19.295	147	tube
23	5	0	19.011	148	tube
23	5	0	17.973	149	tube
23	5	0	17.064	150	tube
23	5	0	15.956	151	tube
23	5	0	15.246	152	tube
23	5	0	12.716	153	tube
[truncated: 9,368 more rows]
