# Supplementary material for: 3D cell neighbour dynamics in growing pseudostratified epithelia
Source: eLife. 2021 Oct 5;10:e68135. doi: 10.7554/eLife.68135 (PMC8570695; doi:10.7554/eLife.68135)
Supplement: Figure 5—source data 2. [file elife-68135-fig5-data2.xls]

## Sheet: volellip
volume	ellipticity	Center of Mass in cell layer
608.661	0.532773	2.19
257.266	0.594805	17.55
362.483	0.639734	25.87
530.416	0.578572	7.2
504.354	0.67928	11.63
388.688	0.657399	14.65
410.679	0.637407	25.5
345.449	0.651681	7.88
411.23	0.506744	20.86
608.936	0.755943	18.31
303.254	0.643696	15.56
405.33	0.548217	22.61
469.223	0.530368	17.02
456.661	0.606786	11.67
437.413	0.588548	19.51
366.921	0.698605	15.39
636.948	0.621393	3.16
559.855	0.678463	13.67
422.837	0.619039	7.53
267.138	0.321667	8.9
289.006	0.279094	7.24
500.393	0.656392	18.41
410.539	0.570621	7.27
402.454	0.481796	25.09
311.641	0.696195	25.31
724.468	0.776642	8.32
516.863	0.873155	13.6
318.947	0.644012	1.68
292.639	0.330632	9.35
226.338	0.576794	11.27
312.796	0.590342	20.5
362.25	0.576255	26.67
328.685	0.516111	19.28
378.749	0.457475	11.96
280.437	0.486938	8.87
267.587	0.44598	24.3
381.107	0.396993	23.38
374.155	0.556367	19.16
391.042	0.651149	9.88
376.227	0.375233	21
290.456	0.728729	21.84
315.945	0.721949	24.02
613.128	0.685533	17.79
356.545	0.455495	4.6
572.28	0.811128	20.22
312.858	0.859473	10.05
451.584	0.669822	19.34
393.958	0.610703	23.34
280.939	0.343082	27.5
298.921	0.69676	10.76
426.195	0.536418	29.95
280.696	0.300557	20.85
341.128	0.280028	23.39
430.883	0.228707	23.02
413.56	0.836624	28.87
471.359	0.671335	24.8
304.075	0.405115	18.86
321.333	0.367465	30.7
251.392	0.278579	18.6
284.06	0.726611	17.03
320.931	0.775935	23.61
378.86	0.600256	31.47
554.685	0.543338	23.86
385.948	0.710568	18.67
309.832	0.543578	30.26
480.24	0.718962	20.55
528.556	0.616704	29.25
540.034	0.703429	25.09
262.555	0.387143	9.72
368.053	0.502122	13.63
306.74	0.735441	21.56
288.538	0.715944	24.88
317.977	0.665872	17.19
331.704	0.595106	22.94
330.427	0.528404	4.75
474.988	0.66792	14.28
473.377	0.575271	19.63
305.129	0.415725	7.69
290.817	0.252149	3.49
416.514	0.23009	28.98
304.434	0.535317	9.02
272.161	0.421106	21.72
291.393	0.525518	20.42
303.805	0.632551	6.28
280.391	0.663274	20.63
570.766	0.412151	5.5
160.856	0.280966	0.31
334.901	0.632523	23.27
374.029	0.426403	10.78
388.929	0.724264	11.13
496.283	0.519575	11.58
350.507	0.421016	23.25
505.263	0.646959	14.11
562.93	0.388308	15.33
452.642	0.647535	11.2
574.46	0.735629	16.85
356.069	0.451551	23.66
964.948	0.394636	5.57
442.996	0.57247	17.51
494.423	0.771909	14.59
536.107	0.397678	20.78
343.558	0.23364	1.91
379.575	0.594996	12.65
396.058	0.60505	21.27
442.4	0.861036	12.82
222.387	0.679874	9.95
345.454	0.440727	13.01
270.015	0.663111	3.05
1157.16	0.341742	1.47
409.779	0.504265	20.63
412.609	0.820963	21.11
518.584	0.832882	14.77
343.182	0.618365	17.37
411.881	0.718367	2.81
318.253	0.354778	4.79
490.106	0.542301	0.5
453.239	0.443449	17.39
563.513	0.785417	15.92
419.397	0.742039	14.27
350.604	0.825146	17.28
552.548	0.539329	10.47
623.948	0.754326	15.03
467.886	0.572588	13.75
472.286	0.699304	4.18
452.936	0.602538	6.08
835.069	0.194623	0
466.332	0.84817	17.62
669.519	0.602649	13.06
331.186	0.453612	21.68
375.626	0.460732	22.62
491.971	0.701949	18.81
477.642	0.800393	15.44
516.817	0.732029	13.78
336.34	0.618511	20.96
393.594	0.545013	20.8
328.496	0.542955	24.51
195.24	0.463972	3.88
248.144	0.30595	4.54
841.039	0.258709	5.25
