# Supplementary material for: 3D cell neighbour dynamics in growing pseudostratified epithelia
Source: eLife. 2021 Oct 5;10:e68135. doi: 10.7554/eLife.68135 (PMC8570695; doi:10.7554/eLife.68135)
Supplement: Figure 5—source data 3. [file elife-68135-fig5-data3.xls]

## Sheet: measurements
	cell diameter	nuclear diameter	Center of Mass in cell layer
1	5.13316	10.5146	2.19
2	4.68355	7.89093	17.55
3	3.95937	8.84633	25.87
4	5.27764	10.0432	7.2
5	5.88333	9.87595	11.63
6	4.95523	9.05456	14.65
7	4.33626	9.2222	25.5
8	4.5377	8.70553	7.88
9	5.01978	9.22632	20.86
10	5.94232	10.5162	18.31
11	4.83736	8.33558	15.56
12	4.49085	9.18199	22.61
13	4.90892	9.64111	17.02
14	6.4256	9.55429	11.67
15	4.98509	9.41812	19.51
16	4.68319	8.88228	15.39
17	5.75965	10.675	3.16
18	5.51673	10.2257	13.67
19	4.93925	9.31232	7.53
20	4.19005	7.99059	8.9
21	4.21568	8.20294	7.24
22	5.2347	9.85003	18.41
23	4.73346	9.22115	7.27
24	4.04331	9.16022	25.09
25	4.32386	8.41173	25.31
26	5.96012	11.1431	8.32
27	5.54061	9.95693	13.6
28	4.06787	8.47696	1.68
29	5.36032	8.23717	9.35
30	4.25022	7.56112	11.27
31	4.68892	8.42211	20.5
32	4.27494	8.84443	26.67
33	5.13081	8.56237	19.28
34	5.6802	8.97672	11.96
35	4.26527	8.12105	8.87
36	4.26163	7.99507	24.3
37	3.98103	8.99531	23.38
38	4.44574	8.94028	19.16
39	4.29914	9.07281	9.88
40	4.82487	8.95675	21
41	4.28492	8.21663	21.84
42	4.61678	8.45028	24.02
43	5.85744	10.5402	17.79
44	4.52307	8.79776	4.6
45	5.48521	10.3008	20.22
46	4.26209	8.42267	10.05
47	5.62333	9.51875	19.34
48	4.24875	9.0953	23.34
49	3.83384	8.12589	27.5
50	4.16219	8.29569	10.76
51	4.42565	9.33691	29.95
52	4.12326	8.12355	20.85
53	5.39623	8.66908	23.39
54	6.36522	9.37102	23.02
55	4.42268	9.24372	28.87
56	5.61826	9.65571	24.8
57	4.02785	8.3431	18.86
58	3.93305	8.49804	30.7
59	3.80411	7.83041	18.6
60	3.87268	8.15587	17.03
61	4.37285	8.4945	23.61
62	4.25801	8.9776	31.47
63	5.17622	10.1941	23.86
64	4.20089	9.03324	18.67
65	3.99492	8.39542	30.26
66	4.87379	9.71598	20.55
67	4.98134	10.0315	29.25
68	5.41633	10.1036	25.09
69	4.05557	7.94463	9.72
70	5.34622	8.89141	13.63
71	4.1281	8.3674	21.56
72	4.18899	8.19851	24.88
73	3.85261	8.46835	17.19
74	4.29081	8.5885	22.94
75	4.06337	8.57747	4.75
76	5.31801	9.68043	14.28
77	4.76031	9.66947	19.63
78	4.35874	8.35273	7.69
79	3.89179	8.22004	3.49
80	4.32628	9.26567	28.98
81	3.80099	8.34638	9.02
82	4.12415	8.04036	21.72
83	4.46221	8.22546	20.42
84	3.72651	8.34063	6.28
85	3.74388	8.12061	20.63
86	6.05165	10.2917	5.5
87	3.18366	6.74755	0.31
88	4.12394	8.616	23.27
89	4.74509	8.93927	10.78
90	4.32431	9.05643	11.13
91	5.8655	9.82299	11.58
92	4.30856	8.74781	23.25
93	5.31845	9.88188	14.11
94	5.71763	10.2444	15.33
95	4.7864	9.52618	11.2
96	5.56669	10.3138	16.85
97	4.1375	8.79384	23.66
98	6.30217	12.2603	5.57
99	5.23526	9.45802	17.51
100	5.38451	9.8107	14.59
101	5.70347	10.079	20.78
102	5.03112	8.68961	1.91
103	4.74	8.98324	12.65
104	4.52955	9.11143	21.27
105	5.17717	9.45378	12.82
106	5.11857	7.51687	9.95
107	4.76962	8.70557	13.01
108	4.38072	8.01918	3.05
109	6.74191	13.0256	1.47
110	4.54896	9.21546	20.63
111	4.35841	9.23663	21.11
112	4.93308	9.96797	14.77
113	4.28806	8.68644	17.37
114	4.61748	9.23119	2.81
115	4.24183	8.4708	4.79
116	4.91286	9.78206	0.5
117	5.238	9.53037	17.39
118	5.31655	10.2479	15.92
119	5.26068	9.287	14.27
120	4.51121	8.74862	17.28
121	6.12963	10.181	10.47
122	6.05135	10.6019	15.03
123	5.61181	9.63194	13.75
124	5.11659	9.66204	4.18
125	4.93476	9.52824	6.08
126	6.09003	11.6835	0
127	5.01213	9.62127	17.62
128	5.95047	10.854	13.06
129	4.79674	8.58403	21.68
130	4.8562	8.95198	22.62
131	5.92564	9.79446	18.81
132	5.49972	9.69843	15.44
133	5.61128	9.95664	13.78
134	4.60298	8.62833	20.96
135	4.42047	9.0925	20.8
136	4.28018	8.56072	24.51
137	4.0551	7.19764	3.88
138	4.52296	7.79654	4.54
139	5.986	11.7113	5.25
