# Supplementary material for: 3D cell neighbour dynamics in growing pseudostratified epithelia
Source: eLife. 2021 Oct 5;10:e68135. doi: 10.7554/eLife.68135 (PMC8570695; doi:10.7554/eLife.68135)
Supplement: Figure 6—source data 1. [file elife-68135-fig6-data1.xls]

## Sheet: Sheet1
cellId	time (min)	area	neighbors	layer
1	140	25.9546	6	apical
10	140	17.7098	5	apical
10	180	13.1401	5	apical
10	200	14.0953	5	apical
100	140	3.60077	5	apical
100	180	24.4229	8	apical
101	140	7.49709	6	apical
101	180	6.20301	5	apical
1012	0	26.4987	7	apical
102	140	7.29262	6	apical
102	180	3.55797	6	apical
102	200	6.55923	5	apical
1025	0	46.3843	8	apical
103	140	24.4163	6	apical
103	180	4.30541	5	apical
103	200	17.8333	7	apical
104	140	2.8776	5	apical
104	180	3.58953	4	apical
104	200	7.59785	8	apical
1044	0	35.7027	9	apical
105	140	5.21491	6	apical
105	180	8.47626	6	apical
105	200	12.0737	6	apical
106	140	11.0891	5	apical
106	180	16.3212	7	apical
1065	0	21.1319	6	apical
1068	0	16.1572	6	apical
1069	0	31.0867	6	apical
107	140	29.7217	8	apical
107	180	2.10848	5	apical
1073	0	26.1574	5	apical
1077	0	29.6797	9	apical
1078	0	28.4953	6	apical
108	60	39.707	9	apical
108	140	5.49198	6	apical
108	180	6.48601	6	apical
108	200	8.69588	6	apical
1083	0	24.4429	6	apical
109	140	6.8918	5	apical
109	180	17.2594	4	apical
109	200	26.0297	7	apical
1091	0	5.18217	4	apical
1092	0	3.96663	5	apical
1093	0	9.97634	9	apical
1094	0	7.10868	7	apical
1095	0	17.7269	9	apical
1096	0	9.50889	5	apical
1097	0	1.14234	6	apical
1099	0	8.01639	5	apical
11	60	31.582	5	apical
11	180	13.3091	7	apical
11	200	9.6698	5	apical
110	140	5.7689	4	apical
110	180	18.8938	7	apical
110	200	20.7942	8	apical
1100	0	21.4693	6	apical
1101	0	15.201	7	apical
1102	0	6.2511	5	apical
1103	0	11.4599	6	apical
1104	0	5.79549	4	apical
111	60	31.6825	5	apical
111	140	15.4104	6	apical
111	180	17.9117	5	apical
111	200	20.9404	6	apical
1115	0	8.24413	6	apical
1116	0	16.4768	6	apical
1117	0	5.62381	5	apical
1118	0	1.28039	4	apical
1119	0	3.43889	4	apical
112	140	22.3992	9	apical
112	180	7.14566	6	apical
112	200	15.375	4	apical
1120	0	9.52751	6	apical
1121	0	20.6446	6	apical
1122	0	12.5546	5	apical
1123	0	3.05887	4	apical
1124	0	11.9036	6	apical
1125	0	22.1977	7	apical
1126	0	14.6281	5	apical
1127	0	5.41536	4	apical
1129	0	4.23622	5	apical
113	140	7.78184	4	apical
113	180	16.3011	7	apical
113	200	5.88339	5	apical
1130	0	5.91305	6	apical
1131	0	5.8945	3	apical
1132	0	13.2064	8	apical
1133	0	7.0132	7	apical
1134	0	3.47583	6	apical
1135	0	5.12076	4	apical
1136	0	23.6224	8	apical
1137	0	4.01598	4	apical
1138	0	8.67305	5	apical
1139	0	13.756	6	apical
114	60	33.2676	6	apical
1140	0	12.8453	5	apical
1141	0	9.51281	3	apical
1142	0	3.14509	4	apical
1143	0	2.12612	3	apical
1145	0	8.09662	5	apical
1146	0	19.8018	6	apical
1147	0	21.0701	8	apical
1148	0	13.0996	8	apical
1149	0	1.24576	5	apical
115	140	16.2983	6	apical
115	200	14.9863	7	apical
1150	0	1.19697	5	apical
1152	0	4.79311	6	apical
1154	0	11.2046	7	apical
1156	0	8.65435	6	apical
1157	0	10.5678	8	apical
1158	0	2.45057	3	apical
116	140	8.5517	6	apical
116	200	12.5996	5	apical
1160	0	21.4516	7	apical
1164	0	11.2827	7	apical
1165	0	5.74274	5	apical
1166	0	12.7541	6	apical
1167	0	6.69233	5	apical
1168	0	9.82482	6	apical
1169	0	2.45361	5	apical
117	140	7.37819	6	apical
117	180	2.86826	5	apical
117	200	19.3987	6	apical
1170	0	1.41083	4	apical
1171	0	3.472	5	apical
1172	0	9.16431	8	apical
1173	0	5.51317	5	apical
1174	0	18.6205	8	apical
1175	0	8.84304	5	apical
1177	0	4.40861	4	apical
1178	0	3.55586	4	apical
118	60	26.9507	7	apical
118	140	7.26978	4	apical
118	200	24.169	7	apical
1182	0	1.19903	4	apical
1184	0	1.55679	3	apical
1188	0	2.93319	3	apical
1189	0	4.41516	6	apical
119	60	48.9338	6	apical
119	140	15.063	6	apical
119	200	12.6513	6	apical
1190	0	4.45174	5	apical
1191	0	0.910506	3	apical
1192	0	11.6387	6	apical
1193	0	8.32006	4	apical
1194	0	7.58612	6	apical
1195	0	2.30186	4	apical
1197	0	12.5076	9	apical
1199	0	4.80461	3	apical
12	60	15.3478	6	apical
12	180	4.60436	5	apical
120	60	13.317	5	apical
120	140	19.6443	5	apical
120	180	27.5398	6	apical
1201	0	13.9649	7	apical
1202	0	2.21862	4	apical
1206	0	6.8431	6	apical
1209	0	18.3477	8	apical
121	180	8.43256	5	apical
1214	0	13.4788	6	apical
1215	0	2.33085	4	apical
122	180	28.4571	8	apical
1225	0	28.9645	7	apical
1227	0	13.5538	4	apical
123	180	11.5978	7	apical
1233	0	1.05063	6	apical
1238	0	18.1221	7	apical
1239	0	6.23942	5	apical
124	180	5.6296	5	apical
124	200	21.1663	6	apical
1242	0	36.6189	8	apical
1243	0	58.0263	7	apical
1244	0	7.2741	7	apical
1245	0	4.82086	5	apical
1246	0	3.83009	5	apical
1247	0	45.3426	9	apical
1248	0	3.57566	4	apical
125	60	37.6141	9	apical
125	140	15.4783	4	apical
125	180	5.37474	5	apical
125	200	8.32293	5	apical
1250	0	3.71368	4	apical
126	140	23.9943	7	apical
126	180	8.20262	5	apical
126	200	19.9593	6	apical
1260	0	20.5896	8	apical
1264	80	16.5851	5	apical
1268	0	16.2549	5	apical
1269	0	4.04	5	apical
127	140	29.352	7	apical
127	180	22.0584	8	apical
127	200	23.1724	5	apical
1270	0	3.76471	5	apical
1271	0	3.69532	5	apical
1276	0	9.88539	6	apical
1277	0	11.0211	7	apical
128	140	18.9137	3	apical
128	180	9.1044	6	apical
128	200	10.9505	6	apical
129	140	25.9126	6	apical
129	180	11.3942	5	apical
130	60	27.7061	8	apical
130	140	14.4329	8	apical
130	200	9.84165	3	apical
131	140	24.3935	8	apical
131	180	9.69905	4	apical
131	200	54.585	8	apical
132	140	13.0121	5	apical
132	180	5.73091	6	apical
132	200	21.755	7	apical
133	180	10.7094	8	apical
133	200	14.363	6	apical
134	180	5.38661	5	apical
134	200	29.903	5	apical
135	140	3.83521	4	apical
135	180	2.62488	5	apical
136	180	4.9828	6	apical
136	200	16.3843	8	apical
137	180	3.38698	4	apical
137	200	17.4731	7	apical
138	200	32.2473	7	apical
139	60	36.7204	6	apical
139	200	7.70383	5	apical
14	180	24.3994	5	apical
140	140	21.9882	8	apical
140	200	6.72609	5	apical
141	140	19.2959	5	apical
141	180	19.4217	7	apical
141	200	10.7554	6	apical
142	140	18.6043	7	apical
142	180	25.9036	6	apical
142	200	11.8384	6	apical
143	140	35.0838	6	apical
143	180	17.6511	6	apical
143	200	26.0487	4	apical
144	140	3.54779	4	apical
144	200	19.9855	9	apical
145	140	12.1853	5	apical
145	180	12.8517	6	apical
145	200	6.20797	5	apical
146	60	19.6688	7	apical
146	180	15.0144	6	apical
146	200	18.8535	5	apical
147	60	24.5479	8	apical
147	180	11.2885	7	apical
147	200	16.1073	7	apical
148	140	17.6984	6	apical
148	200	3.26217	5	apical
149	60	20.6618	6	apical
149	140	9.63352	5	apical
149	180	1.73114	4	apical
149	200	8.29356	6	apical
15	180	13.3008	5	apical
150	140	20.825	6	apical
150	200	4.96004	5	apical
151	60	20.7745	6	apical
151	140	12.3637	7	apical
152	140	10.3088	6	apical
152	180	16.5665	9	apical
152	200	87.8693	7	apical
153	140	3.44833	3	apical
153	180	8.5502	5	apical
153	200	12.5685	4	apical
154	140	14.2249	7	apical
154	180	6.3358	5	apical
154	200	78.3404	6	apical
155	140	20.5667	8	apical
155	180	10.1411	4	apical
155	200	32.2064	8	apical
156	60	21.1286	5	apical
156	140	7.76474	6	apical
1564	80	15.5902	5	apical
157	140	7.64666	6	apical
157	180	24.6105	6	apical
1576	80	22.0337	6	apical
158	60	35.1426	9	apical
158	140	13.1869	6	apical
158	200	16.7654	6	apical
159	140	15.2388	7	apical
159	180	7.04855	6	apical
159	200	3.55506	4	apical
16	140	14.0491	8	apical
16	200	13.9436	7	apical
160	140	11.2329	7	apical
160	180	17.5663	6	apical
160	200	15.2934	6	apical
161	140	9.9978	7	apical
161	180	26.6891	9	apical
161	200	13.7362	5	apical
1619	80	13.8334	7	apical
162	140	11.7116	6	apical
162	180	35.6556	7	apical
162	200	11.0003	4	apical
163	60	18.0068	6	apical
163	140	8.90843	6	apical
163	200	51.8948	7	apical
164	140	9.04482	4	apical
164	180	3.07024	3	apical
165	60	8.14669	5	apical
166	140	3.98846	7	apical
166	200	31.7579	7	apical
167	60	7.72292	6	apical
167	140	14.319	6	apical
167	200	9.26834	7	apical
168	60	11.2046	6	apical
168	140	11.4957	6	apical
169	140	10.251	8	apical
169	180	47.0305	8	apical
169	200	25.8072	7	apical
17	140	5.18477	5	apical
17	180	11.9351	5	apical
17	200	12.5101	5	apical
170	140	4.16088	6	apical
170	180	3.58358	5	apical
170	200	30.2559	7	apical
171	60	7.93073	6	apical
171	140	4.06858	5	apical
171	180	7.50478	4	apical
171	200	6.10492	5	apical
172	140	9.21819	5	apical
172	200	37.2632	6	apical
173	140	10.8438	5	apical
174	60	10.8371	5	apical
174	140	27.4484	8	apical
174	180	22.174	6	apical
175	140	9.73907	5	apical
175	180	11.4147	6	apical
176	60	9.69954	4	apical
176	140	11.3452	5	apical
176	200	32.3726	5	apical
177	140	13.8827	7	apical
177	200	34.6254	7	apical
178	200	8.35885	5	apical
179	180	3.62569	4	apical
1797	80	49.3624	8	apical
1798	80	15.9674	9	apical
1801	80	10.0051	6	apical
181	140	7.91503	6	apical
182	140	10.0571	6	apical
182	200	22.0575	7	apical
183	60	12.2317	6	apical
183	200	8.22843	5	apical
184	60	12.2186	6	apical
184	180	18.7427	7	apical
184	200	19.6124	7	apical
185	60	18.3353	7	apical
186	60	14.6171	7	apical
186	180	34.02	6	apical
186	200	9.94248	5	apical
187	140	15.5501	7	apical
187	180	14.8968	6	apical
188	140	13.8694	7	apical
188	180	3.82197	5	apical
188	200	14.0938	8	apical
189	140	8.76473	6	apical
189	200	2.31557	3	apical
19	140	17.9552	8	apical
19	180	9.34579	6	apical
190	140	4.79793	5	apical
190	180	16.5821	5	apical
191	200	6.38191	7	apical
192	200	14.7172	5	apical
193	140	7.35395	5	apical
193	200	20.6806	7	apical
195	140	6.23994	7	apical
1953	40	12.7493	6	apical
1959	40	18.8474	7	apical
1962	40	6.93718	5	apical
1965	40	6.88142	5	apical
197	140	9.30076	6	apical
198	60	12.3544	6	apical
198	140	10.4204	5	apical
198	200	40.3294	9	apical
199	140	20.995	5	apical
199	200	11.805	6	apical
1990	40	15.4461	7	apical
2	140	5.72626	4	apical
2	180	3.91269	6	apical
20	140	6.17954	5	apical
20	180	8.85068	6	apical
20	200	12.313	5	apical
200	60	16.1701	7	apical
200	140	13.6095	6	apical
201	200	10.6796	4	apical
2015	40	8.41538	4	apical
202	140	16.7741	9	apical
2025	40	27.3961	7	apical
2029	40	15.526	6	apical
203	140	8.1809	4	apical
204	60	7.51422	5	apical
204	140	11.8606	7	apical
204	200	18.5718	6	apical
2047	40	36.7721	8	apical
205	200	12.903	6	apical
2050	40	19.0961	7	apical
2059	40	10.1594	5	apical
206	140	15.7321	5	apical
2062	40	7.46031	6	apical
207	140	11.5525	6	apical
2079	40	10.6334	4	apical
208	60	14.2121	7	apical
2081	40	9.27522	5	apical
2085	40	10.4109	6	apical
2091	40	34.9927	7	apical
2094	40	23.7622	9	apical
2096	40	2.73768	4	apical
21	140	12.879	5	apical
21	200	14.8028	5	apical
211	60	5.26628	5	apical
2112	40	13.0564	7	apical
2116	40	11.1368	5	apical
213	140	11.9594	5	apical
2132	40	21.068	6	apical
2138	40	18.333	6	apical
2143	80	16.3303	6	apical
2146	80	16.368	5	apical
215	60	5.94183	7	apical
2151	80	20.5195	6	apical
2153	80	21.3229	7	apical
2154	40	55.5516	8	apical
216	60	20.8164	6	apical
2161	80	11.7783	6	apical
2163	80	7.57099	5	apical
2169	40	18.3005	6	apical
2170	80	14.4929	6	apical
2172	40	11.776	5	apical
2173	40	24.338	9	apical
2173	80	8.31263	7	apical
2174	40	31.8047	7	apical
2178	80	15.9282	5	apical
2191	40	23.922	5	apical
2193	80	19.0697	5	apical
2194	80	27.9663	9	apical
2195	80	11.047	5	apical
22	60	15.1259	7	apical
22	140	18.3269	7	apical
22	200	12.8667	7	apical
2200	80	17.263	8	apical
2219	80	26.4332	6	apical
222	140	35.1045	8	apical
2220	40	15.061	6	apical
2220	80	25.9302	5	apical
2223	80	15.7145	7	apical
2226	40	11.4857	7	apical
2227	80	17.3134	5	apical
2228	80	13.0731	7	apical
2229	40	9.8938	5	apical
2229	80	11.093	7	apical
223	140	3.96223	4	apical
2230	40	16.0557	6	apical
2231	40	18.4155	7	apical
224	140	7.80116	5	apical
2240	80	9.67378	6	apical
2243	80	13.3256	7	apical
2244	80	10.6513	6	apical
2248	40	30.4058	9	apical
2249	80	24.6076	9	apical
225	60	5.78877	5	apical
225	140	10.6935	4	apical
2250	40	19.4923	6	apical
2251	40	15.8775	6	apical
2253	80	13.1612	5	apical
2254	80	13.9077	6	apical
2255	80	71.0782	9	apical
2268	80	10.5419	8	apical
2269	80	32.9413	8	apical
227	60	13.1766	7	apical
2272	80	7.46887	6	apical
2273	80	13.7427	7	apical
2274	80	19.1498	5	apical
2280	80	21.6015	8	apical
2284	80	37.9157	8	apical
2289	80	13.913	6	apical
2293	80	36.1832	6	apical
23	140	4.22019	4	apical
23	180	1.24691	4	apical
23	200	11.2567	6	apical
230	60	3.22526	4	apical
2302	40	88.7016	6	apical
2305	40	11.3786	5	apical
2306	80	13.7935	6	apical
2307	80	13.6879	5	apical
2308	40	11.2326	5	apical
2308	80	12.9238	7	apical
2309	80	5.71811	5	apical
2311	80	7.77447	4	apical
2312	80	10.953	7	apical
2313	80	8.3366	6	apical
2315	80	13.2939	8	apical
2317	40	9.19862	4	apical
2319	80	5.68587	4	apical
232	60	5.62743	6	apical
2320	40	10.4661	6	apical
2322	80	8.7819	5	apical
2323	40	17.4211	6	apical
2323	80	10.147	5	apical
2324	80	14.8317	6	apical
2325	80	23.1855	9	apical
2326	80	12.2332	5	apical
2327	80	6.78361	6	apical
2328	80	6.33034	6	apical
233	0	19.963	8	apical
2330	80	21.2366	5	apical
2331	80	12.9177	7	apical
2332	80	5.06347	6	apical
2333	80	12.377	6	apical
2334	80	6.07714	4	apical
2335	80	7.74237	8	apical
2336	80	5.76148	4	apical
2337	80	4.38509	5	apical
2338	80	8.78052	6	apical
2339	80	11.4971	5	apical
234	60	9.33562	6	apical
2340	80	2.93789	5	apical
2341	40	25.9849	8	apical
2342	80	3.02048	5	apical
2343	80	10.9341	8	apical
2344	40	73.0334	9	apical
2345	80	11.598	7	apical
2346	40	11.827	6	apical
2346	80	7.34563	5	apical
2347	80	5.13826	7	apical
2348	80	1.12829	3	apical
2349	80	3.02445	6	apical
2353	80	12.6388	8	apical
2354	80	13.5251	4	apical
2355	80	7.34139	5	apical
2356	80	29.3356	5	apical
2360	80	14.595	5	apical
2361	80	2.73154	4	apical
2366	40	26.5718	5	apical
2367	40	30.2789	8	apical
2367	80	14.5058	5	apical
2368	80	9.16843	5	apical
2370	80	14.7805	7	apical
2373	40	25.8	7	apical
2376	80	22.2974	7	apical
2377	40	6.44067	5	apical
2377	80	11.7924	6	apical
2382	80	7.51002	8	apical
2383	80	6.73272	7	apical
2384	80	15.8171	6	apical
2385	40	7.44759	5	apical
2386	40	38.7063	8	apical
2388	80	9.66976	6	apical
2391	40	15.6206	5	apical
2393	80	7.14117	4	apical
2396	80	11.6492	6	apical
2397	80	16.8255	6	apical
2398	80	16.0051	8	apical
2399	80	17.3107	6	apical
24	140	31.5862	7	apical
24	180	6.7668	6	apical
2401	40	30.1771	8	apical
2401	80	7.45461	6	apical
2402	40	14.6106	6	apical
2402	80	1.88122	5	apical
2403	40	23.488	6	apical
2403	80	10.4994	5	apical
2405	80	7.93736	5	apical
2406	80	9.9627	4	apical
2409	80	17.2722	8	apical
2410	80	14.9859	7	apical
2412	80	5.79758	7	apical
2414	80	9.29626	6	apical
2416	80	14.0157	6	apical
2417	80	8.18192	5	apical
2418	80	9.83897	5	apical
2419	80	3.71244	3	apical
2420	80	13.1129	5	apical
2421	80	8.55907	7	apical
2422	40	8.6137	5	apical
2423	40	3.91663	5	apical
2423	80	8.16042	6	apical
2424	80	2.83343	5	apical
2428	80	7.07662	6	apical
243	60	4.1317	4	apical
2430	40	4.81176	5	apical
2430	80	7.34747	7	apical
2431	80	8.57594	7	apical
2432	40	4.92879	5	apical
2433	40	12.6533	6	apical
2434	80	4.64459	7	apical
2435	40	7.40291	5	apical
2437	40	5.1102	4	apical
2439	40	2.29288	4	apical
2443	40	7.00494	4	apical
2444	40	6.23124	4	apical
2444	80	12.1153	5	apical
2447	80	4.22293	5	apical
2448	80	8.63704	6	apical
2449	40	6.73893	5	apical
245	60	11.513	6	apical
2450	40	10.3206	3	apical
2450	80	9.07729	5	apical
2451	40	19.2934	8	apical
2451	80	4.16358	5	apical
2455	40	13.6879	6	apical
2456	40	27.4745	8	apical
2458	40	11.8717	6	apical
2459	40	40.4358	7	apical
2461	40	29.1917	8	apical
2462	40	17.5298	6	apical
2463	80	3.29382	5	apical
2466	80	10.9556	6	apical
2467	40	15.9297	4	apical
2468	80	5.93953	5	apical
2469	80	5.47967	4	apical
247	60	10.6949	6	apical
2470	40	10.4622	6	apical
2470	80	4.12975	5	apical
2471	40	13.2022	6	apical
2472	40	19.3947	8	apical
2472	80	2.85146	6	apical
2473	80	2.6564	3	apical
2474	80	1.3474	4	apical
2475	80	7.19488	6	apical
2476	40	56.8274	7	apical
2477	40	19.519	4	apical
2477	80	2.12179	4	apical
2478	40	15.4625	6	apical
2479	40	8.86446	7	apical
248	60	6.48604	6	apical
2480	40	25.7277	5	apical
2480	80	32.4225	7	apical
2481	40	16.9376	6	apical
2481	80	9.85039	7	apical
2482	40	11.6992	7	apical
2482	80	9.02871	7	apical
2483	40	13.2348	5	apical
2483	80	11.2513	7	apical
2484	40	7.20927	5	apical
2484	80	3.95297	4	apical
2485	40	27.7708	9	apical
2485	80	13.7196	6	apical
2486	80	34.615	8	apical
2487	80	19.1247	6	apical
2488	40	116.418	6	apical
2492	80	9.02735	5	apical
2493	80	6.44922	5	apical
2498	80	7.81016	5	apical
25	140	10.5074	8	apical
25	180	27.9042	9	apical
250	60	17.6963	7	apical
2501	80	2.95537	5	apical
2503	80	19.9804	9	apical
2504	80	11.0252	7	apical
2505	80	1.52778	4	apical
2506	80	15.7745	7	apical
2508	80	8.59193	7	apical
2509	80	8.91964	6	apical
2510	80	2.06458	4	apical
2511	80	3.80019	5	apical
2516	80	11.7082	7	apical
2518	40	5.44508	4	apical
2518	80	26.7528	9	apical
2519	40	38.0997	6	apical
2519	80	6.30735	5	apical
2520	80	9.75132	6	apical
2521	80	6.4287	7	apical
2522	40	8.29637	5	apical
2522	80	2.63223	4	apical
2523	40	4.82521	5	apical
2523	80	31.9816	9	apical
2525	40	5.06632	4	apical
2526	40	22.3288	8	apical
2527	40	4.66602	4	apical
2527	80	18.405	7	apical
2528	40	33.2481	8	apical
2528	80	5.00173	5	apical
2529	40	3.20605	4	apical
2529	80	4.95622	5	apical
2530	40	33.9969	9	apical
2531	40	8.95806	7	apical
2533	40	12.2547	7	apical
2534	40	27.0699	9	apical
2534	80	44.8986	8	apical
2535	40	15.5233	5	apical
2535	80	17.1433	7	apical
2536	40	51.9321	7	apical
2536	80	20.6589	6	apical
2537	40	9.00973	5	apical
2537	80	14.2886	8	apical
2538	40	35.6402	7	apical
2538	80	3.8461	4	apical
2539	40	7.56411	4	apical
2539	80	2.61512	4	apical
2540	40	21.9349	5	apical
2540	80	8.91853	7	apical
2543	40	18.5151	7	apical
2543	80	11.9627	9	apical
2544	40	24.3982	6	apical
2544	80	17.5121	5	apical
2545	40	7.40824	4	apical
2545	80	33.1129	8	apical
2546	40	13.0845	5	apical
2546	80	11.8223	5	apical
2547	40	8.58708	8	apical
2547	80	11.6913	7	apical
2548	40	10.8151	4	apical
2548	80	5.53648	5	apical
2549	40	22.069	5	apical
2549	80	7.53131	6	apical
255	60	7.26262	7	apical
2550	80	10.959	8	apical
2551	40	25.4171	7	apical
2551	80	3.08926	5	apical
2552	40	17.6439	6	apical
2552	80	9.84674	7	apical
2553	40	30.391	5	apical
2553	80	16.2692	6	apical
2554	40	7.35076	5	apical
2554	80	48.5813	9	apical
2555	40	3.35385	5	apical
2556	40	10.6543	6	apical
2557	40	2.79992	7	apical
2558	40	6.49055	4	apical
2558	80	18.491	6	apical
2559	40	10.3106	6	apical
2560	40	18.1635	6	apical
2560	80	14.0462	5	apical
2561	40	14.6584	7	apical
2562	40	8.26271	9	apical
2562	80	2.22648	5	apical
2564	80	8.96397	5	apical
2566	80	17.1923	5	apical
2568	80	2.6536	5	apical
2569	80	8.19477	5	apical
257	60	7.69212	5	apical
2577	80	4.40728	3	apical
258	60	8.72374	7	apical
2580	80	0.770818	5	apical
2584	80	7.37848	4	apical
2585	80	11.0896	7	apical
2586	80	9.52192	4	apical
2587	80	14.3311	7	apical
2588	80	9.07358	6	apical
2589	80	7.77066	7	apical
2593	80	32.4656	5	apical
2594	80	33.8109	6	apical
2595	80	18.9154	6	apical
2596	80	5.75291	3	apical
2597	80	9.49627	6	apical
26	140	3.00892	5	apical
26	180	1.72821	3	apical
26	200	20.3796	6	apical
2600	80	22.376	5	apical
2605	80	14.0781	5	apical
2608	80	3.67142	6	apical
2609	80	9.20201	9	apical
2610	80	16.1995	8	apical
2611	80	11.8387	5	apical
2612	80	39.6452	7	apical
2613	80	10.0421	5	apical
2614	80	16.356	6	apical
2621	80	6.70693	4	apical
2625	80	4.8765	5	apical
263	60	10.282	6	apical
2632	80	10.9644	7	apical
2633	80	33.9051	9	apical
2634	80	37.5497	8	apical
2635	80	11.9179	6	apical
2638	80	29.0565	6	apical
2647	80	1.89249	6	apical
2648	80	11.3539	7	apical
2649	80	18.104	7	apical
2651	80	10.5692	6	apical
2660	100	14.0142	5	apical
2662	100	25.2087	6	apical
2671	100	13.4613	6	apical
2673	100	15.129	7	apical
2681	100	11.5928	5	apical
269	60	6.70911	4	apical
27	140	5.33724	3	apical
27	180	4.33839	5	apical
27	200	7.28626	5	apical
2718	100	11.5081	6	apical
272	60	9.64626	5	apical
2722	100	17.8829	6	apical
2723	100	13.1616	7	apical
2724	100	9.67112	5	apical
2725	100	10.2124	5	apical
273	60	19.9337	6	apical
2731	100	28.5192	9	apical
274	60	6.65225	6	apical
2741	100	26.82	5	apical
2744	100	11.5521	6	apical
2745	100	18.1931	5	apical
2747	100	24.327	6	apical
2750	100	21.318	6	apical
2752	100	27.8073	9	apical
2753	100	28.7549	7	apical
2756	100	10.2269	4	apical
2762	100	10.5584	6	apical
2763	100	30.6848	7	apical
2773	100	20.3021	8	apical
2778	100	12.5157	7	apical
2781	100	17.6345	7	apical
2783	100	24.0317	9	apical
2793	100	39.5732	6	apical
28	140	15.2295	7	apical
28	180	28.406	7	apical
28	200	14.3728	5	apical
280	60	12.838	8	apical
2800	100	36.4802	7	apical
2801	100	15.2404	5	apical
2805	100	13.852	8	apical
2820	100	22.6652	6	apical
2822	100	22.6374	7	apical
2824	100	23.9325	7	apical
2831	100	28.5025	9	apical
2834	100	25.6906	6	apical
2836	100	17.6538	5	apical
284	60	15.458	5	apical
2840	100	19.4882	6	apical
2841	100	25.7107	8	apical
2842	100	16.9722	7	apical
2848	100	20.5037	7	apical
285	60	10.3712	6	apical
2850	100	14.0128	6	apical
2852	100	22.2754	8	apical
2857	100	50.328	9	apical
2867	100	22.7749	7	apical
2892	100	4.46522	4	apical
2893	100	7.91088	6	apical
2894	100	7.1605	5	apical
2895	100	4.54914	5	apical
2896	100	14.9443	5	apical
2898	100	2.71887	5	apical
2899	100	1.33361	4	apical
29	60	22.1419	8	apical
29	140	5.77737	5	apical
29	180	17.9461	9	apical
2906	100	5.55551	7	apical
2907	100	11.2628	5	apical
2908	100	9.33642	6	apical
291	160	13.5018	6	apical
2914	100	3.21866	3	apical
2918	100	4.30341	4	apical
2919	100	7.75027	7	apical
292	60	5.26955	6	apical
2920	100	7.93227	3	apical
2921	100	8.59699	5	apical
2922	100	2.86903	4	apical
2923	100	12.7692	7	apical
2924	100	7.85178	5	apical
2925	100	20.6317	9	apical
2928	100	14.5778	7	apical
293	160	17.9774	5	apical
2930	100	11.0543	6	apical
2931	100	9.08295	6	apical
2932	100	5.66725	4	apical
2934	100	16.1029	7	apical
2935	100	5.55832	4	apical
2936	100	10.167	6	apical
294	160	11.3483	7	apical
2941	100	13.284	5	apical
2943	100	7.13415	5	apical
2948	100	11.1518	5	apical
295	160	16.3629	7	apical
2956	100	10.1552	7	apical
2962	100	8.60353	7	apical
2963	100	5.60137	5	apical
2967	100	11.785	6	apical
2969	100	5.71592	5	apical
297	60	7.80964	6	apical
297	160	8.51063	4	apical
2970	100	4.87678	5	apical
2978	100	5.81309	6	apical
2979	100	4.83101	5	apical
298	60	4.54611	5	apical
298	160	13.1533	6	apical
2980	100	14.2853	5	apical
2982	100	5.53402	5	apical
2983	100	4.39704	5	apical
2984	100	7.49591	5	apical
2987	100	17.9633	6	apical
2988	100	9.94047	6	apical
299	160	10.5387	7	apical
2990	100	19.8554	8	apical
2992	100	17.3477	7	apical
3	140	18.5152	9	apical
3	200	13.5056	5	apical
30	140	6.12726	6	apical
30	200	25.2194	7	apical
300	160	8.09431	5	apical
301	160	4.66399	5	apical
302	60	7.05851	4	apical
302	160	8.78038	5	apical
3020	100	7.89968	7	apical
3022	100	11.1078	7	apical
3023	100	5.7711	6	apical
304	160	13.5215	6	apical
3056	100	18.08	8	apical
306	60	16.1118	8	apical
307	160	19.5254	6	apical
308	60	4.01742	6	apical
309	60	11.1598	4	apical
31	180	1.92835	5	apical
31	200	11.185	5	apical
312	60	7.5339	5	apical
312	160	15.5723	6	apical
313	160	16.9843	4	apical
314	160	5.11992	6	apical
315	160	23.2016	7	apical
316	160	11.6488	5	apical
317	160	8.49389	5	apical
318	60	6.84855	5	apical
318	160	9.81746	5	apical
319	160	22.9917	6	apical
32	180	22.9419	6	apical
320	160	17.0146	7	apical
321	60	4.75054	4	apical
321	160	7.81545	5	apical
3216	100	5.76965	5	apical
3217	100	41.3589	9	apical
3218	100	1.87909	5	apical
3220	100	1.35593	3	apical
3221	100	16.8763	9	apical
3224	100	8.32817	6	apical
323	60	9.66791	7	apical
323	160	4.23384	5	apical
3232	100	16.9714	8	apical
3234	100	8.27083	6	apical
324	160	32.7905	6	apical
3240	100	13.305	6	apical
3241	100	4.81213	5	apical
3242	100	23.2606	6	apical
3243	100	3.14409	4	apical
3244	100	4.0993	4	apical
3245	100	65.7031	9	apical
3246	100	5.90474	6	apical
325	160	8.64576	8	apical
3251	100	13.1336	5	apical
3252	100	19.35	6	apical
3253	100	31.2872	7	apical
3254	100	14.9542	5	apical
3255	100	23.9612	7	apical
3256	100	5.73757	5	apical
3257	100	14.2573	5	apical
3258	100	35.8645	9	apical
3259	100	5.03884	5	apical
326	160	8.52507	8	apical
3260	100	1.86475	3	apical
3261	100	34.1559	9	apical
3262	100	2.88008	6	apical
3263	100	4.31122	4	apical
3265	100	22.3695	6	apical
3266	100	2.13857	5	apical
3267	100	22.8113	6	apical
3268	100	24.4608	8	apical
3269	100	12.7518	5	apical
327	60	13.2322	6	apical
327	160	3.9234	4	apical
3270	100	11.4429	6	apical
3271	100	10.713	6	apical
3272	100	22.1508	6	apical
3273	100	18.732	8	apical
3274	100	17.6346	6	apical
3275	100	16.1431	4	apical
3276	100	19.2018	9	apical
3277	100	7.30081	5	apical
3278	100	3.93138	5	apical
3279	100	39.5799	5	apical
328	60	9.39732	4	apical
328	160	19.1122	7	apical
3280	100	27.0288	7	apical
3282	100	5.94345	4	apical
3283	100	8.54584	6	apical
3287	100	18.6017	7	apical
3289	100	25.3663	5	apical
329	60	7.89959	7	apical
329	160	3.4136	4	apical
3293	100	12.3833	7	apical
3294	100	6.54171	4	apical
3295	100	12.6095	5	apical
3296	100	15.875	6	apical
3298	100	61.0467	7	apical
3299	100	16.4977	8	apical
33	180	18.5889	7	apical
33	200	19.0302	7	apical
330	60	6.42115	6	apical
330	160	22.8023	7	apical
3300	100	5.71255	5	apical
3301	100	25.6525	6	apical
3303	100	9.26692	7	apical
3304	100	3.40452	4	apical
3305	100	9.09413	7	apical
3306	100	6.773	7	apical
3307	100	0.830918	4	apical
3308	100	17.5019	5	apical
331	160	16.7581	4	apical
3310	100	19.1695	7	apical
3311	100	7.06107	6	apical
3312	100	11.0633	6	apical
3313	100	3.08845	5	apical
3314	100	4.47803	5	apical
3315	100	11.3325	6	apical
3316	100	11.36	6	apical
3317	100	30.8071	6	apical
332	60	11.5121	7	apical
332	160	17.7258	8	apical
3320	100	48.024	7	apical
3321	100	38.8221	6	apical
3322	100	29.5614	6	apical
3323	100	31.5834	6	apical
3327	100	21.7844	8	apical
3328	100	6.65927	5	apical
3329	100	9.51105	6	apical
333	60	3.5565	4	apical
333	160	7.37113	3	apical
3330	100	11.0964	6	apical
3331	100	7.96374	5	apical
3332	100	46.0402	9	apical
3336	100	8.0608	4	apical
3337	100	10.408	5	apical
3338	100	12.0672	6	apical
3339	100	13.4784	5	apical
334	60	7.28959	4	apical
334	160	9.60559	6	apical
3342	100	12.3655	6	apical
3347	100	11.4331	5	apical
3348	100	15.2261	5	apical
3349	100	18.7604	7	apical
335	160	11.1691	6	apical
3350	100	17.3931	7	apical
3351	100	2.11248	4	apical
3352	100	40.9987	7	apical
3354	100	18.4399	5	apical
3355	100	45.3003	7	apical
3356	100	4.02527	6	apical
3357	100	12.115	6	apical
3358	100	2.8932	5	apical
3359	100	17.6861	7	apical
336	160	7.84761	5	apical
3362	100	6.99664	6	apical
3367	100	11.9881	5	apical
3369	100	19.7277	7	apical
337	60	5.62175	5	apical
337	160	10.4668	8	apical
3370	100	7.71627	5	apical
3372	100	28.0511	8	apical
3375	100	23.1616	5	apical
3376	100	10.3168	7	apical
3377	100	5.95022	4	apical
3378	100	15.9615	7	apical
3379	100	49.4062	9	apical
3380	100	7.5871	4	apical
3381	100	12.4178	6	apical
3382	100	10.3216	4	apical
3383	100	2.17444	5	apical
3384	100	3.26566	5	apical
3385	100	28.9522	9	apical
3386	100	11.1244	4	apical
3387	100	5.48287	5	apical
3388	100	11.9949	6	apical
3389	100	13.5892	6	apical
3390	100	21.2001	7	apical
3391	100	39.3127	7	apical
3392	100	12.5908	5	apical
3394	100	6.96478	4	apical
3395	100	33.1027	6	apical
3396	100	4.18485	5	apical
3397	100	3.12511	4	apical
3398	100	6.28033	4	apical
3399	100	39.4096	8	apical
34	60	20.769	9	apical
34	180	9.50003	5	apical
3400	100	15.7833	5	apical
3407	100	10.1258	5	apical
3408	100	5.00783	5	apical
3411	100	10.3361	5	apical
3412	100	5.66871	7	apical
3413	100	23.9224	6	apical
3414	100	10.8243	5	apical
3417	100	22.7806	6	apical
3418	100	6.81342	4	apical
342	60	12.0982	5	apical
344	60	9.09135	7	apical
345	160	18.7845	6	apical
346	60	6.68006	5	apical
349	160	10.3901	5	apical
35	140	14.244	6	apical
35	180	3.78573	6	apical
35	200	12.239	5	apical
350	160	12.84	6	apical
351	160	9.28986	4	apical
352	60	4.62886	4	apical
352	160	31.5929	7	apical
353	60	3.73202	7	apical
354	60	2.563	5	apical
355	160	13.1208	9	apical
356	60	11.9284	6	apical
356	160	26.1301	7	apical
357	60	15.8489	6	apical
357	160	3.12809	5	apical
358	160	17.4356	5	apical
359	160	14.1098	7	apical
36	140	7.35319	5	apical
36	180	16.8686	6	apical
36	200	20.6901	7	apical
360	60	10.3309	5	apical
360	160	24.263	8	apical
361	60	7.50554	5	apical
361	160	17.6723	7	apical
362	60	7.5658	5	apical
362	160	33.4944	8	apical
363	60	11.7139	5	apical
364	160	14.3869	6	apical
365	60	2.79032	4	apical
365	160	12.3441	6	apical
366	160	36.2695	8	apical
367	60	8.55403	5	apical
367	160	8.92226	4	apical
368	60	7.98207	5	apical
368	160	18.1324	6	apical
369	60	9.57067	5	apical
37	140	7.65574	6	apical
37	180	9.49885	5	apical
370	160	4.62894	4	apical
371	60	9.55815	6	apical
371	160	17.3701	6	apical
372	60	7.52002	6	apical
373	60	8.47011	6	apical
373	160	4.11889	5	apical
374	60	10.177	5	apical
374	160	12.8276	6	apical
375	60	5.0205	5	apical
375	160	16.9948	5	apical
376	160	12.4139	5	apical
378	60	3.02302	4	apical
378	160	38.4165	9	apical
379	60	4.50266	7	apical
379	160	11.046	4	apical
38	140	17.8999	7	apical
38	180	11.2851	5	apical
38	200	18.0318	5	apical
380	60	8.85588	4	apical
380	160	15.5857	5	apical
381	60	21.8136	7	apical
381	160	12.308	6	apical
382	60	7.26823	5	apical
382	160	11.4841	5	apical
383	160	7.42286	5	apical
384	60	2.62185	5	apical
384	160	5.05975	5	apical
385	60	5.25946	5	apical
385	160	17.5348	9	apical
386	160	7.62995	6	apical
387	120	15.5959	5	apical
387	160	7.83922	5	apical
388	60	5.09067	5	apical
388	160	12.8231	8	apical
389	120	19.9483	8	apical
389	160	11.3194	6	apical
39	180	13.9676	5	apical
39	200	11.0444	7	apical
390	60	12.7304	4	apical
390	120	32.211	5	apical
390	160	3.72888	5	apical
391	120	23.0876	6	apical
391	160	5.54947	6	apical
392	120	8.78803	6	apical
392	160	21.0296	8	apical
393	60	9.53219	6	apical
393	120	19.4427	5	apical
393	160	6.91928	4	apical
394	60	15.6087	6	apical
394	120	14.8853	7	apical
394	160	14.9896	8	apical
395	60	10.8452	5	apical
395	120	23.3899	8	apical
395	160	15.7829	8	apical
396	60	4.54356	6	apical
396	120	12.2762	6	apical
396	160	27.845	6	apical
397	120	2.82834	4	apical
397	160	5.93061	5	apical
398	120	8.20585	5	apical
398	160	8.15403	6	apical
399	60	25.2679	8	apical
399	160	4.73372	4	apical
40	180	14.8144	6	apical
40	200	10.9494	5	apical
400	160	15.6495	6	apical
401	120	4.95807	5	apical
401	160	16.6589	6	apical
402	60	6.5948	6	apical
402	120	4.90551	5	apical
403	60	10.4193	5	apical
403	160	24.6132	6	apical
404	60	8.04126	5	apical
404	120	13.165	7	apical
405	60	18.4209	6	apical
405	120	13.3312	7	apical
406	120	7.57286	5	apical
406	160	12.2541	6	apical
4064	20	20.1029	7	apical
407	120	3.58211	5	apical
407	160	6.54702	5	apical
408	60	8.66902	4	apical
408	120	16.992	9	apical
408	160	19.9099	9	apical
409	160	19.2786	5	apical
41	180	13.1115	5	apical
41	200	11.2916	6	apical
410	120	9.5264	6	apical
410	160	28.3198	9	apical
411	120	3.12737	4	apical
411	160	10.9069	3	apical
412	160	18.4549	8	apical
413	160	8.88581	5	apical
414	120	16.7808	7	apical
414	160	4.2271	5	apical
415	60	11.9479	7	apical
415	120	7.49178	4	apical
415	160	4.32123	5	apical
416	160	12.5124	7	apical
417	120	8.81893	6	apical
417	160	18.3409	8	apical
418	60	11.8862	4	apical
418	120	5.72959	5	apical
419	60	5.36777	5	apical
419	120	7.8366	6	apical
419	160	6.69106	5	apical
42	60	33.3483	8	apical
42	180	6.33753	6	apical
42	200	11.8046	6	apical
420	60	5.65929	4	apical
420	120	28.573	9	apical
420	160	6.5662	6	apical
421	60	12.8095	7	apical
421	120	2.86216	4	apical
421	160	5.25454	4	apical
422	120	6.66487	6	apical
422	160	3.8322	6	apical
423	120	8.7749	7	apical
423	160	3.91812	6	apical
424	160	10.2627	5	apical
425	120	10.6668	6	apical
425	160	13.9576	6	apical
426	120	7.82185	5	apical
426	160	16.8115	6	apical
427	120	4.37111	5	apical
428	120	6.80754	8	apical
429	120	5.47696	4	apical
43	140	19.232	5	apical
43	180	2.4619	5	apical
43	200	12.0495	7	apical
430	60	12.1499	6	apical
430	120	5.08034	5	apical
431	120	18.8488	8	apical
432	120	7.63902	6	apical
432	160	16.4627	6	apical
433	120	5.00811	7	apical
433	160	21.8904	7	apical
434	120	5.02507	4	apical
434	160	5.61694	3	apical
435	120	8.54816	6	apical
435	160	30.4044	7	apical
436	60	5.20909	7	apical
436	120	5.15243	5	apical
436	160	15.3572	6	apical
437	60	6.53338	5	apical
437	120	8.17581	6	apical
437	160	12.3507	5	apical
438	120	7.04604	5	apical
438	160	11.0958	5	apical
439	60	4.9244	3	apical
439	120	15.2585	7	apical
439	160	6.43202	4	apical
44	140	13.8531	6	apical
44	180	6.61009	5	apical
44	200	6.46073	6	apical
440	60	7.80576	5	apical
440	120	6.21246	6	apical
4406	20	22.2021	8	apical
441	60	2.36114	5	apical
441	120	47.3112	8	apical
442	60	4.56247	4	apical
442	120	1.38601	4	apical
442	160	10.5477	4	apical
443	60	26.9889	6	apical
443	120	32.9721	8	apical
444	60	6.86121	6	apical
444	120	29.3063	5	apical
445	60	9.26833	5	apical
445	160	14.0415	4	apical
446	160	2.99157	4	apical
447	60	10.8283	5	apical
447	120	5.50292	6	apical
447	160	10.6421	7	apical
448	120	14.6195	6	apical
448	160	11.8231	7	apical
449	0	32.9991	7	apical
449	60	12.1844	5	apical
449	120	9.61082	6	apical
449	160	2.90916	6	apical
45	60	36.1901	8	apical
45	140	11.158	7	apical
45	180	16.8023	7	apical
45	200	14.6059	7	apical
450	60	10.8911	5	apical
450	120	5.26801	4	apical
450	160	10.0989	9	apical
451	60	12.5568	6	apical
451	160	1.52489	4	apical
452	120	8.36711	5	apical
452	160	20.7622	7	apical
453	60	17.6341	7	apical
453	120	6.94897	4	apical
453	160	8.21436	6	apical
454	120	7.99414	6	apical
454	160	3.94409	5	apical
455	120	5.65017	6	apical
456	60	6.36862	3	apical
456	120	4.05202	5	apical
456	160	28.4273	7	apical
457	60	14.6435	7	apical
457	160	9.15432	4	apical
458	160	7.84543	4	apical
459	60	6.14285	5	apical
46	140	16.961	5	apical
46	200	21.4253	8	apical
460	120	12.8684	8	apical
460	160	5.10793	3	apical
461	60	17.9159	6	apical
461	120	5.05736	7	apical
461	160	26.0265	6	apical
462	60	10.1723	4	apical
462	120	16.4781	7	apical
463	60	11.7203	6	apical
463	120	12.4765	7	apical
464	60	11.7609	7	apical
464	120	3.43839	3	apical
465	60	11.3492	5	apical
4653	20	40.402	7	apical
466	120	9.47642	6	apical
4660	20	22.1832	6	apical
4661	20	28.4446	8	apical
4663	20	19.6929	7	apical
4664	20	12.2824	9	apical
467	120	2.83937	5	apical
467	160	20.4895	8	apical
468	60	8.1067	7	apical
468	120	12.8444	6	apical
468	160	7.19808	4	apical
469	60	8.17541	5	apical
469	160	24.8624	8	apical
47	140	10.2736	7	apical
47	200	14.0731	5	apical
470	60	4.24958	6	apical
470	160	4.05742	4	apical
4707	20	12.7916	6	apical
471	60	8.57853	3	apical
471	120	25.1005	8	apical
471	160	13.5989	9	apical
4713	20	22.3705	9	apical
472	60	16.528	8	apical
472	120	5.37798	6	apical
472	160	24.9691	9	apical
4724	20	11.3621	5	apical
473	60	10.2291	6	apical
473	120	4.88227	5	apical
473	160	2.01231	3	apical
474	120	16.8561	8	apical
474	160	3.73572	6	apical
475	60	4.83133	6	apical
475	120	10.3214	7	apical
475	160	2.13286	4	apical
476	60	7.91825	7	apical
476	120	11.465	7	apical
476	160	3.17461	8	apical
477	60	8.08212	5	apical
477	120	4.80554	5	apical
477	160	4.53026	5	apical
478	60	11.8087	6	apical
478	120	5.78869	4	apical
478	160	3.92795	5	apical
479	60	28.4412	8	apical
479	120	23.5171	7	apical
479	160	5.53826	5	apical
48	140	5.90602	6	apical
48	200	14.3663	7	apical
480	60	8.55401	9	apical
480	160	2.38678	4	apical
481	60	4.91194	3	apical
481	160	14.3871	6	apical
482	160	3.78968	5	apical
483	120	4.49344	4	apical
484	160	1.52478	4	apical
486	60	11.0028	6	apical
486	120	52.2045	7	apical
487	60	12.7742	5	apical
487	120	17.587	5	apical
488	120	6.34488	4	apical
488	160	2.56197	4	apical
489	60	9.85814	5	apical
489	160	13.3399	8	apical
49	180	31.1308	8	apical
49	200	7.40208	5	apical
490	60	4.32309	4	apical
491	60	24.4288	9	apical
492	60	11.1096	5	apical
493	60	11.4643	7	apical
493	120	5.16427	6	apical
494	60	5.31863	7	apical
494	160	20.6911	8	apical
495	60	21.2538	7	apical
495	160	9.42531	7	apical
496	60	13.689	7	apical
496	160	28.2744	8	apical
497	60	21.9492	8	apical
497	160	5.54652	4	apical
498	60	20.8028	8	apical
498	160	7.23575	4	apical
499	0	44.0775	8	apical
499	160	13.6803	6	apical
5	60	22.9213	8	apical
5	200	15.7541	7	apical
50	140	12.1996	7	apical
50	180	36.5686	9	apical
50	200	13.0608	6	apical
500	60	10.1178	7	apical
501	120	3.97425	7	apical
501	160	17.9493	8	apical
502	60	9.28896	4	apical
502	120	0.652716	4	apical
502	160	16.7139	7	apical
503	60	13.568	5	apical
503	120	11.5006	6	apical
503	160	18.7194	4	apical
504	60	19.979	5	apical
504	120	7.45733	4	apical
505	120	34.8808	6	apical
505	160	7.48278	5	apical
506	60	3.65089	3	apical
506	120	22.2516	9	apical
506	160	4.73272	6	apical
507	60	6.56182	7	apical
507	120	3.55567	3	apical
508	60	3.50435	5	apical
509	60	7.43379	6	apical
509	160	19.7128	8	apical
51	60	30.3773	5	apical
51	180	9.04978	6	apical
510	160	13.3198	5	apical
513	120	10.2672	5	apical
514	120	17.9611	8	apical
515	120	9.9147	7	apical
516	60	35.5577	8	apical
516	120	11.6758	6	apical
517	60	7.23389	5	apical
517	120	25.8204	8	apical
518	120	15.0083	7	apical
52	140	9.94948	4	apical
52	180	13.8301	6	apical
52	200	3.45258	4	apical
520	60	25.0532	7	apical
521	120	7.09871	6	apical
5210	20	13.557	5	apical
523	120	7.16742	5	apical
5234	20	13.5241	7	apical
524	60	25.3205	8	apical
524	120	6.00706	5	apical
5242	20	15.4847	5	apical
525	60	4.76531	5	apical
525	120	3.22297	6	apical
526	60	6.9048	7	apical
526	120	8.98124	6	apical
527	60	11.5209	5	apical
527	120	17.0243	6	apical
528	120	5.93154	6	apical
529	60	21.5255	6	apical
529	120	7.03248	6	apical
5294	20	29.8891	7	apical
53	140	19.6708	7	apical
53	180	7.26543	5	apical
53	200	30.2418	7	apical
532	120	2.95043	5	apical
5326	20	31.3068	8	apical
533	120	8.49892	6	apical
534	120	8.62582	6	apical
535	120	1.83568	4	apical
536	60	25.4358	8	apical
536	120	6.7982	5	apical
537	60	1.91749	5	apical
537	120	7.83559	4	apical
538	120	13.7182	6	apical
539	60	27.1097	9	apical
539	120	7.9728	7	apical
54	140	2.22063	4	apical
54	180	20.9505	7	apical
54	200	10.3667	5	apical
540	120	14.019	5	apical
541	120	5.97264	5	apical
542	60	2.04448	4	apical
542	120	19.5485	7	apical
543	120	8.01024	7	apical
544	60	1.55383	5	apical
544	120	33.9641	9	apical
545	120	1.19995	4	apical
547	60	4.61212	5	apical
5470	20	4.86281	4	apical
548	60	12.903	6	apical
549	60	10.4396	5	apical
55	60	14.291	6	apical
55	140	15.5607	7	apical
55	180	13.0776	6	apical
55	200	17.1518	6	apical
550	60	3.70884	4	apical
550	120	12.8962	6	apical
551	60	7.102	6	apical
551	120	17.5852	7	apical
552	60	14.3022	6	apical
553	120	16.8281	7	apical
554	120	2.04841	5	apical
5542	20	4.76007	8	apical
555	60	2.71894	5	apical
556	60	2.28158	5	apical
556	120	8.58801	6	apical
5561	20	32.0102	7	apical
5569	20	17.8736	6	apical
557	60	6.80075	6	apical
557	120	17.5338	6	apical
558	60	1.42191	4	apical
558	120	1.20416	4	apical
559	120	29.7589	7	apical
56	140	9.69462	4	apical
56	180	8.3634	5	apical
560	120	11.0902	5	apical
5604	20	4.01307	3	apical
561	60	4.76987	6	apical
561	120	13.2091	7	apical
562	120	1.22383	5	apical
5629	20	37.1911	9	apical
563	60	14.4278	6	apical
563	120	28.8497	6	apical
564	120	8.93687	6	apical
565	120	7.33566	4	apical
566	120	15.381	7	apical
567	120	8.73703	7	apical
568	60	10.4138	5	apical
568	120	10.4143	7	apical
569	120	8.33382	8	apical
57	60	47.6001	8	apical
57	140	19.16	6	apical
57	180	4.78094	6	apical
570	120	9.77631	6	apical
571	120	9.63863	6	apical
572	60	36.6276	9	apical
572	120	6.16998	6	apical
5722	20	13.2203	8	apical
573	60	21.7979	8	apical
573	120	3.06243	4	apical
574	60	4.12518	5	apical
574	120	11.2639	5	apical
5741	20	16.4334	5	apical
5744	20	32.3261	7	apical
575	120	6.10835	4	apical
577	120	20.8838	8	apical
579	0	18.607	6	apical
579	120	23.4463	8	apical
58	140	25.0599	6	apical
58	180	18.2046	7	apical
58	200	23.6231	7	apical
580	120	20.8705	5	apical
582	120	9.33069	6	apical
583	120	32.9612	8	apical
584	120	9.94429	7	apical
5841	20	104.586	6	apical
5844	20	31.2721	9	apical
585	120	15.1499	7	apical
5850	20	13.1276	8	apical
586	120	42.8413	9	apical
5865	20	41.6295	6	apical
587	120	12.2806	5	apical
589	120	5.72405	6	apical
5899	20	58.3942	5	apical
59	140	11.465	7	apical
59	200	14.2546	4	apical
590	120	3.35446	5	apical
592	120	5.83302	7	apical
593	120	3.45717	4	apical
595	120	8.35492	6	apical
596	120	20.4943	6	apical
5966	20	19.0517	6	apical
5967	20	14.7266	5	apical
6	60	30.0154	8	apical
60	140	9.95053	7	apical
60	200	3.73836	4	apical
603	120	5.44836	5	apical
605	120	11.5816	7	apical
606	120	9.40492	4	apical
607	120	11.2678	6	apical
608	120	15.3858	8	apical
609	120	6.23956	6	apical
61	200	20.4978	6	apical
610	120	2.30448	5	apical
611	120	15.2768	7	apical
612	120	4.29796	4	apical
613	120	6.45689	4	apical
614	120	10.4412	6	apical
615	120	9.86	8	apical
616	120	11.4828	5	apical
617	120	7.84428	4	apical
618	120	10.8056	6	apical
619	120	9.96779	8	apical
62	180	12.4465	5	apical
62	200	14.6289	8	apical
63	180	5.33907	5	apical
63	200	14.274	4	apical
6334	20	8.99011	5	apical
6335	20	7.42872	4	apical
6340	20	9.19483	6	apical
6342	20	11.3339	6	apical
6345	20	16.2161	6	apical
6347	20	8.78593	6	apical
6348	20	13.135	6	apical
6349	20	11.8818	6	apical
635	120	32.9951	5	apical
6352	20	7.58349	4	apical
6353	20	8.62774	7	apical
6354	20	1.60583	4	apical
6355	20	19.5476	8	apical
6356	20	3.41646	3	apical
6357	20	2.33861	5	apical
6358	20	13.7805	6	apical
6359	20	12.2652	6	apical
6360	20	9.86818	4	apical
6361	20	7.39698	3	apical
637	120	24.5037	7	apical
6370	20	56.2479	9	apical
6372	20	6.65989	7	apical
6376	20	8.73864	5	apical
638	120	5.58527	3	apical
6383	20	4.94049	5	apical
639	120	18.8162	7	apical
6391	20	8.75075	6	apical
6392	20	4.01071	7	apical
6396	20	10.5371	5	apical
6397	20	1.63835	4	apical
6398	20	4.70993	6	apical
6399	20	4.14045	4	apical
64	140	14.0461	5	apical
64	180	16.032	6	apical
640	120	26.3396	5	apical
6400	20	6.75452	6	apical
6401	20	4.84176	5	apical
6406	20	4.06384	4	apical
6407	20	6.57399	4	apical
6408	20	3.95951	4	apical
641	120	20.1529	7	apical
6410	20	2.5368	7	apical
6411	20	1.30339	4	apical
6412	20	6.97295	6	apical
6415	20	4.35501	4	apical
6419	20	5.67691	6	apical
6420	20	8.83283	5	apical
6424	20	12.9659	8	apical
6425	20	7.27004	6	apical
6431	20	4.39203	6	apical
6433	20	7.96507	6	apical
6434	20	5.82472	6	apical
6439	20	8.62108	4	apical
6445	20	6.67643	5	apical
6446	20	9.55495	5	apical
6447	20	10.8329	4	apical
645	120	11.8629	5	apical
6453	20	8.6103	4	apical
6458	20	2.58084	5	apical
6459	20	6.85828	4	apical
646	120	13.5488	6	apical
6460	20	6.08196	6	apical
6461	20	5.36524	4	apical
6464	20	7.05381	6	apical
6465	20	20.9847	8	apical
6466	20	5.28515	3	apical
6469	20	18.7292	5	apical
647	120	12.7692	6	apical
6470	20	9.10546	6	apical
6477	20	24.9652	8	apical
648	120	26.9106	6	apical
6487	20	2.34531	4	apical
6488	20	9.92901	8	apical
6490	20	10.0363	5	apical
6492	20	0.613899	6	apical
6496	20	0.978316	5	apical
6497	20	1.94096	3	apical
65	140	16.6409	6	apical
65	180	25.8643	8	apical
65	200	9.11729	8	apical
6500	20	17.813	6	apical
6501	20	3.52626	5	apical
6502	20	9.17387	6	apical
6503	20	7.60698	6	apical
6505	20	0.965657	4	apical
6509	20	6.69275	4	apical
6511	20	1.91681	4	apical
6513	20	10.4214	7	apical
6520	20	20.6248	8	apical
6529	20	8.10026	4	apical
6538	20	13.6394	6	apical
654	120	22.5418	9	apical
6545	20	26.8353	6	apical
6546	20	5.3078	5	apical
655	120	9.32189	5	apical
6552	20	7.52951	5	apical
6553	20	4.86908	6	apical
6554	20	5.64436	7	apical
6555	20	17.1005	5	apical
6557	20	38.0152	7	apical
6558	20	11.2788	6	apical
6559	20	10.4773	6	apical
6560	20	10.2678	6	apical
6561	20	17.6786	5	apical
6562	20	14.0851	6	apical
6565	20	11.5732	5	apical
6566	20	10.6453	6	apical
6567	20	5.6699	4	apical
6568	20	13.8168	6	apical
6569	20	31.7219	7	apical
657	120	6.84414	4	apical
6570	20	3.73474	4	apical
6571	20	16.6369	6	apical
6575	20	8.64887	4	apical
6578	20	4.01271	5	apical
6579	20	25.8572	7	apical
658	120	22.7014	8	apical
659	120	3.64361	6	apical
66	140	28.4095	8	apical
66	180	11.3511	5	apical
66	200	14.6586	6	apical
660	120	2.61047	4	apical
6604	20	17.6129	5	apical
6605	20	9.92735	7	apical
6607	20	10.0417	7	apical
6608	20	8.25893	7	apical
6609	20	15.3272	7	apical
661	120	9.28706	8	apical
6611	20	21.6181	7	apical
6612	20	34.836	9	apical
6613	20	10.5512	7	apical
6614	20	20.5922	6	apical
6615	20	33.2887	6	apical
6616	20	9.43691	7	apical
6617	20	8.75827	3	apical
6618	20	9.34296	7	apical
6619	20	6.48748	4	apical
662	120	5.40674	6	apical
6620	20	8.07873	7	apical
6621	20	5.07402	4	apical
6622	20	18.0603	8	apical
6623	20	1.04679	4	apical
6624	20	1.62275	4	apical
6625	20	10.0488	8	apical
6630	20	28.9656	8	apical
6631	20	11.1532	5	apical
6632	20	24.7865	6	apical
6633	20	15.995	5	apical
6634	20	12.3232	5	apical
6635	20	56.8307	6	apical
6638	20	7.44784	6	apical
664	120	48.6607	9	apical
6640	20	20.8594	4	apical
6642	20	20.3714	6	apical
6643	20	17.5409	4	apical
665	120	13.3375	7	apical
667	120	21.8086	6	apical
668	120	16.7346	5	apical
669	120	10.4168	5	apical
67	140	41.7352	8	apical
67	180	10.1216	5	apical
67	200	6.13387	4	apical
670	120	23.8307	7	apical
672	120	5.73865	5	apical
673	120	26.9823	6	apical
674	120	5.16969	5	apical
677	120	17.412	6	apical
678	120	2.56387	4	apical
679	120	43.3852	9	apical
68	140	4.87312	5	apical
68	180	8.83265	5	apical
68	200	7.87107	6	apical
69	140	5.93805	6	apical
69	200	13.3377	7	apical
693	0	21.221	5	apical
697	0	43.7514	7	apical
7	140	16.8038	6	apical
7	200	14.8786	5	apical
71	60	27.1807	8	apical
71	140	12.9183	5	apical
71	180	17.388	6	apical
711	0	18.4147	5	apical
72	140	24.4445	6	apical
73	140	12.0999	6	apical
73	200	15.593	6	apical
74	140	12.5486	4	apical
74	200	19.6241	6	apical
75	60	39.6667	7	apical
75	140	15.2329	6	apical
75	200	8.54704	6	apical
754	60	18.8242	8	apical
757	60	9.48357	5	apical
76	140	6.61158	5	apical
76	180	5.36177	5	apical
77	140	14.2115	6	apical
78	140	23.8395	6	apical
78	180	40.8665	9	apical
780	60	42.6125	8	apical
781	60	6.66799	5	apical
782	60	1.74831	5	apical
783	60	4.6232	5	apical
789	60	36.7227	8	apical
79	60	24.8869	9	apical
79	140	17.5378	8	apical
79	180	8.88919	7	apical
79	200	15.9746	7	apical
790	60	31.6491	7	apical
791	60	44.5959	6	apical
792	60	13.0236	6	apical
793	60	5.91216	5	apical
795	60	9.7371	5	apical
796	60	5.12429	4	apical
8	140	9.30116	4	apical
80	140	8.70099	4	apical
80	180	2.25839	4	apical
80	200	25.0543	5	apical
81	140	10.4634	7	apical
81	180	4.67206	6	apical
82	140	22.1809	9	apical
82	180	10.1874	6	apical
83	140	13.3023	6	apical
83	180	13.5247	5	apical
833	0	29.3416	8	apical
835	0	27.7867	6	apical
84	140	13.0848	7	apical
84	180	7.60992	4	apical
840	0	42.1839	5	apical
85	140	12.9619	5	apical
85	180	4.32218	6	apical
85	200	2.81567	4	apical
86	140	4.9369	5	apical
86	180	31.3269	7	apical
87	140	25.2824	5	apical
87	180	21.9422	6	apical
88	200	8.83709	5	apical
89	140	7.72914	4	apical
89	180	9.03447	6	apical
89	200	31.0077	9	apical
9	60	21.21	6	apical
9	140	12.5931	6	apical
9	200	9.18751	4	apical
90	180	18.3838	7	apical
90	200	14.1586	5	apical
91	140	8.44282	4	apical
91	180	4.27707	4	apical
91	200	15.8179	7	apical
92	140	12.6189	6	apical
92	180	22.1509	7	apical
92	200	16.1864	3	apical
93	140	12.129	6	apical
93	200	18.0923	7	apical
939	0	14.9848	7	apical
94	140	6.38575	4	apical
94	180	23.7212	9	apical
94	200	17.0154	6	apical
940	0	51.575	5	apical
95	60	29.6302	9	apical
95	140	18.9107	7	apical
95	180	8.17583	4	apical
95	200	2.69849	6	apical
96	140	16.5128	9	apical
96	180	11.3058	7	apical
96	200	3.20915	5	apical
97	140	7.88271	6	apical
97	180	8.67122	5	apical
97	200	13.4551	6	apical
98	140	12.0794	7	apical
98	180	16.4734	7	apical
98	200	13.6134	6	apical
99	140	11.8312	6	apical
99	180	5.32504	5	apical
99	200	16.8475	6	apical
999	0	85.6669	6	apical
10	180	44.5018	6	basal
1000	0	32.9832	6	basal
1000	120	24.6616	3	basal
1001	20	25.3994	5	basal
1002	0	48.6399	6	basal
1002	20	25.0645	7	basal
1003	20	11.8302	6	basal
1004	0	45.0252	5	basal
1004	20	40.5093	6	basal
1005	0	66.8392	7	basal
1005	120	8.49665	4	basal
1006	120	21.8735	5	basal
1007	20	28.4958	5	basal
1007	120	11.8306	5	basal
1008	20	38.0836	7	basal
1009	20	84.1139	9	basal
101	20	58.434	5	basal
1010	20	52.5258	6	basal
1011	0	40.9012	6	basal
1011	120	4.80708	4	basal
1012	120	14.4617	5	basal
1014	0	50.094	8	basal
1014	120	19.8624	5	basal
1015	0	23.448	5	basal
1015	120	4.47121	4	basal
1016	0	49.2692	8	basal
1016	120	43.5678	7	basal
1017	0	19.8684	6	basal
1018	120	13.6654	5	basal
1019	120	10.5631	4	basal
1020	20	39.3951	5	basal
1021	0	36.4164	5	basal
1021	20	52.0201	6	basal
1022	0	41.5062	5	basal
1022	120	15.1021	5	basal
1023	0	38.9213	6	basal
1023	20	23.3176	4	basal
1025	0	40.15	7	basal
1025	20	36.3431	5	basal
1026	20	62.5087	6	basal
1027	0	13.561	5	basal
1027	20	22.2905	5	basal
1028	0	53.6076	7	basal
1029	0	45.6719	7	basal
1029	120	67.5756	7	basal
103	20	52.0263	7	basal
1030	0	34.3965	5	basal
1031	0	45.1029	7	basal
1033	0	43.8365	7	basal
1033	20	47.7946	6	basal
1033	120	65.8778	7	basal
1034	0	29.0559	5	basal
1035	0	29.9359	7	basal
1035	20	33.4823	6	basal
1036	0	58.6675	6	basal
1036	20	9.39303	4	basal
1037	0	46.9751	7	basal
1037	20	11.1308	5	basal
1037	120	10.1454	5	basal
1038	20	6.09299	4	basal
1039	20	17.1229	5	basal
1039	120	38.1556	6	basal
104	20	35.2039	6	basal
104	180	30.0814	7	basal
1040	0	61.6357	7	basal
1040	20	8.49443	4	basal
1040	120	50.7146	9	basal
1041	20	18.5435	5	basal
1042	0	62.3752	7	basal
1042	20	11.9199	4	basal
1043	0	57.3176	7	basal
1043	20	21.4742	4	basal
1045	0	18.4756	5	basal
1045	20	13.3305	4	basal
1045	120	20.4503	4	basal
1046	0	64.7309	7	basal
1046	20	14.5824	4	basal
1047	0	37.7738	5	basal
1047	20	8.4789	5	basal
1047	120	54.7311	8	basal
1048	0	34.4684	4	basal
1048	20	9.44595	4	basal
1048	160	13.5562	5	basal
1049	0	23.5864	4	basal
1049	20	9.43175	4	basal
1049	120	43.999	6	basal
105	60	45.5115	7	basal
105	160	47.4503	8	basal
1050	0	29.9023	6	basal
1050	20	8.7144	4	basal
1050	160	9.29906	4	basal
1051	0	45.4839	6	basal
1051	20	13.5519	5	basal
1051	120	35.3929	5	basal
1051	160	10.0279	6	basal
1052	0	30.8149	6	basal
1052	20	12.6484	4	basal
1052	120	33.2732	5	basal
1053	20	14.7358	5	basal
1053	120	23.9408	6	basal
1053	160	31.099	7	basal
1054	20	8.57353	3	basal
1054	120	30.7278	6	basal
1054	160	13.1485	6	basal
1055	0	20.7793	4	basal
1055	120	27.2325	5	basal
1055	160	19.8647	7	basal
1056	20	22.6038	6	basal
1057	0	42.5615	5	basal
1058	0	17.9243	5	basal
1059	0	66.392	8	basal
1060	0	59.5903	8	basal
1060	160	9.34034	4	basal
[truncated: 3,523 more rows]
