# Supplementary material for: 3D cell neighbour dynamics in growing pseudostratified epithelia
Source: eLife. 2021 Oct 5;10:e68135. doi: 10.7554/eLife.68135 (PMC8570695; doi:10.7554/eLife.68135)
Supplement: Figure 6—source data 2. [file elife-68135-fig6-data2.xls]

## Sheet: layer_CV
timepoint	CV	layer
0	0.975671	apical
20	0.941383	apical
40	0.86985	apical
60	0.735019	apical
80	0.752493	apical
100	0.736548	apical
120	0.765899	apical
140	0.546162	apical
160	0.612407	apical
180	0.697307	apical
200	0.719683	apical
0	0.464913	basal
20	0.460414	basal
40	0.412413	basal
60	0.39058	basal
80	0.400414	basal
100	0.452194	basal
120	0.448083	basal
140	0.500206	basal
160	0.459619	basal
180	0.470073	basal
200	0.483229	basal
