# Supplementary material for: 3D cell neighbour dynamics in growing pseudostratified epithelia
Source: eLife. 2021 Oct 5;10:e68135. doi: 10.7554/eLife.68135 (PMC8570695; doi:10.7554/eLife.68135)
Supplement: Figure 6—source data 3. [file elife-68135-fig6-data3.xls]

## Sheet: aw_law_all
Id	n	m	t (min)	layer
1099	5	6.6	0	apical
1214	6	5.33333	0	apical
833	9	5.14286	0	apical
1206	7	5.5	0	apical
1260	8	6.75	0	apical
1077	9	5.33333	0	apical
1243	7	5.85714	0	apical
1073	5	6.6	0	apical
1081	10	6.2	0	apical
1100	6	6.16667	0	apical
1132	8	6.25	0	apical
1174	8	6.25	0	apical
1277	7	5.85714	0	apical
1090	13	5.53846	0	apical
499	8	5.5	0	apical
1125	7	5.42857	0	apical
1122	5	6	0	apical
1225	8	5.58333	0	apical
1025	8	7	0	apical
1242	8	6.625	0	apical
1103	6	6.66667	0	apical
1244	7	6.42857	0	apical
1142	4	7.25	0	apical
1261	11	5.45455	0	apical
1065	6	8	0	apical
1152	6	6.16667	0	apical
1095	9	6.22222	0	apical
1130	6	6.5	0	apical
1238	7	6	0	apical
725	10	6.6	0	apical
1136	8	7	0	apical
697	8	5.41667	0	apical
999	7	6.6	0	apical
1201	7	5.28571	0	apical
840	5	7.8	0	apical
1083	6	7	0	apical
1139	6	6.66667	0	apical
711	5	7.8	0	apical
449	8	5.83333	0	apical
1069	6	6.16667	0	apical
1145	5	6.4	0	apical
1146	6	7	0	apical
1154	7	6	0	apical
1209	8	6	0	apical
1164	7	6.85714	0	apical
1227	4	6.25	0	apical
1147	8	5.875	0	apical
1271	5	5.6	0	apical
693	4	7	0	apical
1168	7	5.8	0	apical
1096	5	6.2	0	apical
1247	9	5.77778	0	apical
1148	8	5.875	0	apical
1175	5	7	0	apical
1137	4	8.5	0	apical
1078	7	6	0	apical
1157	8	7.375	0	apical
1012	7	6.42857	0	apical
1197	9	5	0	apical
1165	5	6.4	0	apical
1160	7	6.28571	0	apical
1239	5	7	0	apical
1134	6	6.5	0	apical
1166	6	6.83333	0	apical
1044	9	5.55556	0	apical
1115	6	6.5	0	apical
1117	5	7.4	0	apical
1156	6	6.33333	0	apical
1104	4	7.25	0	apical
1102	5	6.8	0	apical
1124	6	6.5	0	apical
579	6	6	0	apical
1101	7	6.14286	0	apical
1121	6	7	0	apical
940	5	6.6	0	apical
835	6	6.83333	0	apical
1123	4	6.5	0	apical
1269	5	7.2	0	apical
1118	4	7.5	0	apical
1068	6	6.16667	0	apical
1172	8	6.375	0	apical
233	8	5.625	0	apical
1250	4	8.25	0	apical
1199	3	6.33333	0	apical
1194	6	6.33333	0	apical
939	6	6.4	0	apical
1169	5	5.8	0	apical
1091	4	6.75	0	apical
1251	13	5.76923	0	apical
1129	5	5.4	0	apical
1171	5	7.4	0	apical
1116	6	6.83333	0	apical
1140	5	7.2	0	apical
1094	7	6.57143	0	apical
1173	5	7	0	apical
1268	5	6.4	0	apical
1126	5	6	0	apical
1092	5	7.4	0	apical
1135	4	6.75	0	apical
1170	4	6.25	0	apical
1276	6	6	0	apical
1189	6	6.16667	0	apical
1167	5	6.6	0	apical
1131	3	8	0	apical
1191	3	8.33333	0	apical
1133	7	6	0	apical
1245	5	8.4	0	apical
1246	5	8.2	0	apical
1248	4	7.25	0	apical
1190	5	6.4	0	apical
1120	6	6.16667	0	apical
1141	3	8.33333	0	apical
1093	9	6.11111	0	apical
1192	6	6.66667	0	apical
1193	4	6.75	0	apical
1178	4	6.75	0	apical
1150	4	6.66667	0	apical
1138	5	6.4	0	apical
1202	4	7	0	apical
1127	4	6.5	0	apical
1184	3	8.66667	0	apical
1097	6	6.33333	0	apical
1188	3	6.66667	0	apical
1182	4	8	0	apical
1158	3	6.66667	0	apical
1195	5	6.83333	0	apical
1143	3	9.66667	0	apical
1177	4	6.75	0	apical
1215	4	6.5	0	apical
1233	6	6.5	0	apical
1119	4	7.75	0	apical
1270	5	7.2	0	apical
1149	4	7.33333	0	apical
859	7	6.14286	0	basal
1253	5	6.2	0	basal
952	7	6	0	basal
1047	5	6	0	basal
852	7	6	0	basal
828	8	5.625	0	basal
970	7	6.28571	0	basal
934	8	6.25	0	basal
1278	6	6.33333	0	basal
1289	5	6.4	0	basal
1051	6	5.83333	0	basal
1197	6	6.16667	0	basal
752	6	6.33333	0	basal
710	6	6	0	basal
1046	7	6.57143	0	basal
699	6	6.33333	0	basal
586	7	6.16667	0	basal
831	5	6.8	0	basal
646	5	6.6	0	basal
593	6	5.8	0	basal
1239	5	6	0	basal
1255	6	5.83333	0	basal
1272	5	6.4	0	basal
559	7	5.71429	0	basal
1314	5	6.4	0	basal
560	5	6.4	0	basal
1072	5	5.6	0	basal
1073	5	6.2	0	basal
527	5	6	0	basal
1316	5	6.4	0	basal
499	6	5.83333	0	basal
1317	6	5.83333	0	basal
729	6	6.16667	0	basal
696	8	6	0	basal
1283	5	6.6	0	basal
1374	4	6.25	0	basal
1099	7	5.85714	0	basal
1313	6	5.83333	0	basal
961	6	5.83333	0	basal
576	6	6.16667	0	basal
567	8	5.75	0	basal
1005	7	5.71429	0	basal
500	6	6.16667	0	basal
501	5	6.4	0	basal
982	8	5.75	0	basal
570	5	6.8	0	basal
954	6	6.5	0	basal
550	6	6	0	basal
651	5	6.8	0	basal
955	6	6.16667	0	basal
937	6	6.16667	0	basal
1319	6	5.83333	0	basal
504	5	6	0	basal
575	8	5.625	0	basal
587	8	6	0	basal
1382	7	5.71429	0	basal
1108	4	5.75	0	basal
1112	7	5	0	basal
753	5	6.375	0	basal
1035	7	5.85714	0	basal
634	6	6	0	basal
711	6	6.5	0	basal
842	5	5.6	0	basal
648	7	5.71429	0	basal
531	6	5.5	0	basal
1036	6	6	0	basal
532	5	6	0	basal
535	7	6	0	basal
572	7	5.71429	0	basal
1086	5	6.6	0	basal
1358	8	6	0	basal
1092	6	5.7	0	basal
1284	7	5.85714	0	basal
706	5	6.6	0	basal
1312	6	6	0	basal
1117	6	6.5	0	basal
1286	6	5.83333	0	basal
786	6	6.33333	0	basal
1198	6	6	0	basal
1173	6	6	0	basal
754	5	6.4	0	basal
1403	5	6	0	basal
1331	7	5.85714	0	basal
515	5	6.6	0	basal
1244	6	6	0	basal
1277	7	5.85714	0	basal
1413	6	6	0	basal
573	5	6.4	0	basal
563	6	6.33333	0	basal
1245	7	5.71429	0	basal
730	8	5.875	0	basal
574	5	6.375	0	basal
1057	5	6.4	0	basal
871	8	6	0	basal
735	5	6.4	0	basal
967	6	5.83333	0	basal
807	7	6	0	basal
552	5	6.6	0	basal
557	6	6.16667	0	basal
1350	5	6	0	basal
822	8	5.41667	0	basal
1227	6	6.33333	0	basal
778	8	6	0	basal
1140	8	6.25	0	basal
1141	7	6.14286	0	basal
1101	5	6.6	0	basal
521	6	6	0	basal
1158	8	5.75	0	basal
498	6	6.33333	0	basal
1248	6	6.33333	0	basal
808	7	5.85714	0	basal
853	5	6.8	0	basal
1362	7	5.5	0	basal
1361	5	6	0	basal
1172	6	6.16667	0	basal
540	6	6	0	basal
969	5	6.6	0	basal
539	7	5.42857	0	basal
1121	6	6.66667	0	basal
810	6	6.5	0	basal
1167	6	5.875	0	basal
537	5	6.8	0	basal
1288	6	6.33333	0	basal
835	8	5.5	0	basal
1257	6	6.16667	0	basal
1290	6	5.66667	0	basal
1256	6	6	0	basal
889	9	5.66667	0	basal
1052	6	6	0	basal
1391	5	6.4	0	basal
1113	6	6	0	basal
1252	7	6	0	basal
947	6	6.5	0	basal
968	5	6.2	0	basal
657	6	6.16667	0	basal
1058	5	6.4	0	basal
855	5	6.6	0	basal
1273	7	5.85714	0	basal
1174	8	5.75	0	basal
1279	5	6.2	0	basal
914	6	6.5	0	basal
1414	7	5.85714	0	basal
1275	8	5.75	0	basal
544	6	6.16667	0	basal
1412	5	6.4	0	basal
1011	5	6.125	0	basal
833	7	5.71429	0	basal
1297	5	6.4	0	basal
1311	6	6	0	basal
1300	5	6.8	0	basal
1308	7	5.85714	0	basal
1291	6	6.16667	0	basal
561	6	6.33333	0	basal
996	5	6.25	0	basal
1302	7	5.57143	0	basal
861	5	6.2	0	basal
1377	8	5.75	0	basal
763	7	6	0	basal
1102	6	6.33333	0	basal
1409	6	6.66667	0	basal
1203	6	5.66667	0	basal
666	7	6.14286	0	basal
823	6	6.33333	0	basal
644	5	6.6	0	basal
1264	5	6.6	0	basal
514	7	5.71429	0	basal
1408	7	6	0	basal
1354	5	6.6	0	basal
1016	8	5.875	0	basal
1262	5	7	0	basal
1415	6	6.16667	0	basal
1373	4	6.75	0	basal
1263	7	5.85714	0	basal
950	7	6.14286	0	basal
1371	5	6.4	0	basal
668	7	6.08333	0	basal
1265	6	6	0	basal
739	6	6	0	basal
619	6	6.16667	0	basal
579	6	5.66667	0	basal
1364	5	6.4	0	basal
588	7	6.14286	0	basal
1025	7	6	0	basal
1029	7	6	0	basal
734	7	6	0	basal
589	6	5.83333	0	basal
959	5	6.6	0	basal
1418	8	5.75	0	basal
1080	6	6	0	basal
1059	7	5.66667	0	basal
1356	6	5.33333	0	basal
1030	5	6.2	0	basal
1128	6	5.83333	0	basal
1211	6	6.16667	0	basal
1132	5	6	0	basal
1134	7	5.14286	0	basal
1381	5	6.6	0	basal
1075	7	6	0	basal
1224	6	6.5	0	basal
863	7	5.85714	0	basal
594	6	6.33333	0	basal
1189	7	6.14286	0	basal
1191	5	6.4	0	basal
1192	7	5.85714	0	basal
1353	5	6.4	0	basal
709	7	6.08333	0	basal
1202	6	6	0	basal
1372	4	6.5	0	basal
1037	7	5.57143	0	basal
1169	7	6	0	basal
733	6	6.16667	0	basal
598	6	6	0	basal
677	5	6	0	basal
1177	5	6.2	0	basal
700	5	6.8	0	basal
702	7	6.14286	0	basal
708	6	6	0	basal
658	5	5.875	0	basal
915	6	6.16667	0	basal
716	7	5.85714	0	basal
718	6	6.16667	0	basal
1214	6	6	0	basal
725	6	6.16667	0	basal
736	5	5.75	0	basal
686	5	5.4	0	basal
1166	5	7.4	0	basal
1343	8	5.5	0	basal
768	5	6.125	0	basal
597	5	6.4	0	basal
771	8	5.42857	0	basal
774	6	6.33333	0	basal
1355	4	6.25	0	basal
743	6	5.83333	0	basal
780	5	6.4	0	basal
746	6	6	0	basal
750	7	5.75	0	basal
796	6	6.1	0	basal
1200	5	6.4	0	basal
599	5	6.4	0	basal
748	4	6.5	0	basal
781	6	5.9	0	basal
784	5	6.8	0	basal
785	7	6	0	basal
755	6	6.16667	0	basal
756	7	5.85714	0	basal
767	5	5.625	0	basal
1342	4	6.75	0	basal
802	5	6.75	0	basal
773	6	6	0	basal
1341	3	7	0	basal
776	7	5.85714	0	basal
620	5	6.4	0	basal
795	5	6.2	0	basal
819	6	6	0	basal
1148	7	5.71429	0	basal
820	6	6	0	basal
609	7	5.71429	0	basal
615	6	6.3	0	basal
825	6	6.5	0	basal
856	5	6.4	0	basal
611	6	5.5	0	basal
604	6	6	0	basal
816	6	5.5	0	basal
814	6	5.83333	0	basal
1178	6	6.16667	0	basal
850	6	6.3	0	basal
616	6	6.16667	0	basal
627	6	6.16667	0	basal
660	8	6.25	0	basal
617	6	6.5	0	basal
839	6	6.33333	0	basal
867	7	5.85714	0	basal
869	6	6.5	0	basal
851	6	6.33333	0	basal
1120	5	6.2	0	basal
1420	5	6.2	0	basal
1416	6	6.33333	0	basal
836	7	6	0	basal
880	7	6	0	basal
881	7	6.14286	0	basal
1348	5	6.4	0	basal
1351	7	6.42857	0	basal
1150	7	6.28571	0	basal
1352	4	6.75	0	basal
888	5	6.6	0	basal
868	5	7	0	basal
629	7	5.42857	0	basal
877	6	6.16667	0	basal
1014	8	6.25	0	basal
1218	5	6.66667	0	basal
1201	7	5.71429	0	basal
898	8	5.5	0	basal
911	7	6.42857	0	basal
1337	4	7	0	basal
1338	5	6.8	0	basal
901	7	6	0	basal
891	7	6	0	basal
1368	4	6.5	0	basal
636	6	6.5	0	basal
903	8	5.875	0	basal
904	6	6	0	basal
1375	4	6.25	0	basal
905	6	6.16667	0	basal
1055	4	7	0	basal
906	5	6.4	0	basal
924	6	6.5	0	basal
929	7	6.42857	0	basal
639	6	5.83333	0	basal
910	6	6.33333	0	basal
1335	3	8	0	basal
917	6	6.5	0	basal
919	6	6	0	basal
1144	7	5.85714	0	basal
971	6	5.83333	0	basal
987	4	6.5	0	basal
1060	8	6.375	0	basal
1068	4	5.75	0	basal
1204	7	5.57143	0	basal
1229	4	6.5	0	basal
932	5	6.2	0	basal
1336	4	7	0	basal
939	5	6.4	0	basal
940	5	6.2	0	basal
944	6	5.83333	0	basal
1346	5	6.25	0	basal
757	6	6.16667	0	basal
956	6	5.83333	0	basal
920	7	6	0	basal
922	5	6.4	0	basal
661	6	6	0	basal
1156	7	5.71429	0	basal
972	7	5.71429	0	basal
975	5	6.2	0	basal
977	6	6.33333	0	basal
715	6	6	0	basal
978	8	5.75	0	basal
1147	7	6	0	basal
1180	7	6.14286	0	basal
1369	4	6.5	0	basal
973	6	6.16667	0	basal
989	6	6	0	basal
991	6	5.83333	0	basal
942	6	6.16667	0	basal
765	6	6.16667	0	basal
1206	6	5.83333	0	basal
663	6	6.16667	0	basal
1000	6	5.83333	0	basal
671	7	6.14286	0	basal
1021	5	6.8	0	basal
1042	6	5.7	0	basal
1004	5	6.6	0	basal
731	4	7	0	basal
1064	8	5.5	0	basal
1017	6	6.33333	0	basal
1002	6	6.16667	0	basal
1022	5	6.6	0	basal
1015	5	6.4	0	basal
1076	7	5.85714	0	basal
682	6	5.5	0	basal
1023	5	6.375	0	basal
1183	5	6.4	0	basal
1027	4	6.83333	0	basal
1031	7	5.85714	0	basal
1033	7	5.85714	0	basal
1043	7	5.71429	0	basal
1367	4	7.5	0	basal
1231	7	5.71429	0	basal
1028	7	5.85714	0	basal
1185	5	7.4	0	basal
687	6	6.16667	0	basal
1062	6	6.5	0	basal
1050	6	5.83333	0	basal
1034	5	6.2	0	basal
703	7	6.14286	0	basal
1105	6	6.33333	0	basal
1220	7	5.42857	0	basal
701	5	6.4	0	basal
1081	5	6.2	0	basal
1065	6	6.33333	0	basal
797	4	7	0	basal
1151	7	5.83333	0	basal
1095	6	6	0	basal
1363	3	7.25	0	basal
1040	6	5.4	0	basal
1078	6	6.16667	0	basal
1207	8	6.125	0	basal
1082	6	6.16667	0	basal
1109	6	5.83333	0	basal
1129	9	5.66667	0	basal
1087	6	6.83333	0	basal
1088	5	5.8	0	basal
1131	7	5.6	0	basal
1124	6	6.16667	0	basal
1127	6	6.66667	0	basal
1107	7	6	0	basal
732	5	5.75	0	basal
1126	5	6	0	basal
1159	5	6.6	0	basal
1208	3	7.33333	0	basal
779	5	6.6	0	basal
1194	5	5.6	0	basal
1410	4	6	0	basal
766	4	7	0	basal
1048	4	6.75	0	basal
1195	5	5.75	0	basal
1411	7	5.41667	0	basal
1347	5	6.8	0	basal
1176	5	7.2	0	basal
1045	5	5.8	0	basal
1155	6	5.5	0	basal
1077	8	5.5	0	basal
1406	5	6.4	0	basal
1049	4	7.25	0	basal
1190	4	7	0	basal
1212	4	7.5	0	basal
1339	5	6.6	0	basal
1419	5	6	0	basal
1357	5	6.4	0	basal
1153	5	6.2	0	basal
1345	5	5.75	0	basal
1344	5	6	0	basal
1404	5	6.6	0	basal
513	5	5.8	0	basal
1340	4	7	0	basal
5899	6	5.625	20	apical
5865	7	5.5	20	apical
6459	4	7.25	20	apical
6342	6	7	20	apical
6347	5	7.125	20	apical
4653	7	6.28571	20	apical
6490	5	7	20	apical
6460	6	7.33333	20	apical
6348	6	6	20	apical
5294	7	5.85714	20	apical
6559	6	5.83333	20	apical
6630	8	6.25	20	apical
6561	5	6.4	20	apical
6560	6	6.33333	20	apical
5841	6	6.5	20	apical
6552	4	7.5	20	apical
6554	7	6.14286	20	apical
6553	6	6.66667	20	apical
6465	8	6.2	20	apical
6466	3	NA	20	apical
5744	7	6.28571	20	apical
6537	10	5.9	20	apical
6538	6	6.83333	20	apical
6370	9	6	20	apical
6445	5	6.4	20	apical
6607	8	6.27273	20	apical
4724	5	7	20	apical
6609	7	5.85714	20	apical
6608	7	6.57143	20	apical
5844	8	5.78571	20	apical
6396	5	6.4	20	apical
5615	11	5.55	20	apical
6643	4	7.5	20	apical
6446	5	6	20	apical
6487	3	5.75	20	apical
6488	7	5.58333	20	apical
5561	6	6.1	20	apical
6349	5	6.375	20	apical
6604	5	6.2	20	apical
6575	4	6	20	apical
6453	4	8.25	20	apical
5326	8	6.125	20	apical
6605	8	5.25	20	apical
6570	4	6.5	20	apical
6439	4	6.5	20	apical
6613	7	5.85714	20	apical
6610	10	6.4	20	apical
6612	9	6.88889	20	apical
6614	6	6.66667	20	apical
6569	7	6	20	apical
6615	6	6.5	20	apical
6545	6	6.33333	20	apical
6376	6	6.2	20	apical
5569	6	6	20	apical
6345	6	5.83333	20	apical
6611	7	7.14286	20	apical
4602	11	4.9375	20	apical
6412	6	6.5	20	apical
6458	4	8	20	apical
6492	5	5.25	20	apical
6354	5	6.33333	20	apical
5542	8	6	20	apical
6355	8	6.625	20	apical
6555	4	6.66667	20	apical
6353	8	5.66667	20	apical
6352	4	7	20	apical
6399	4	7	20	apical
6356	3	8.66667	20	apical
6633	5	6.2	20	apical
6638	7	5	20	apical
6419	6	6.33333	20	apical
5966	6	6	20	apical
6634	5	6.4	20	apical
4663	7	5.85714	20	apical
6520	8	5.5	20	apical
5332	12	6	20	apical
6635	6	7	20	apical
6415	5	6.16667	20	apical
6461	4	8.25	20	apical
6632	6	5.83333	20	apical
6558	6	6.5	20	apical
6497	3	7	20	apical
5741	5	6.6	20	apical
6398	6	6	20	apical
4660	6	6.5	20	apical
4664	9	6.55556	20	apical
6397	4	7.25	20	apical
6513	6	5.8	20	apical
6640	4	6	20	apical
6509	4	6.5	20	apical
6502	6	6	20	apical
6546	6	4.5	20	apical
6557	7	6.14286	20	apical
6372	7	6.71429	20	apical
6477	8	6.375	20	apical
6631	5	6.6	20	apical
4406	8	6.375	20	apical
6361	3	8.33333	20	apical
6579	7	6.14286	20	apical
5470	4	6.5	20	apical
5234	7	5.85714	20	apical
6500	6	6	20	apical
6529	4	6.5	20	apical
4064	7	6.28571	20	apical
6433	6	7	20	apical
6431	6	6.33333	20	apical
6618	7	6.85714	20	apical
6383	5	7.2	20	apical
5629	9	5.77778	20	apical
6357	5	7	20	apical
4661	8	5.875	20	apical
6358	6	6.33333	20	apical
6625	8	6.75	20	apical
6568	6	6.5	20	apical
4707	6	7.33333	20	apical
6469	5	6.6	20	apical
5210	5	6	20	apical
6565	5	6.4	20	apical
5967	5	6.2	20	apical
6359	6	6.33333	20	apical
6360	4	7.25	20	apical
6571	6	6	20	apical
5242	5	6	20	apical
6621	4	6	20	apical
6578	5	6.8	20	apical
6505	4	6.5	20	apical
6434	6	6	20	apical
6447	4	6.75	20	apical
6616	7	5.85714	20	apical
6392	7	6.28571	20	apical
6391	6	5.83333	20	apical
5604	3	6.33333	20	apical
6470	6	5.66667	20	apical
6340	6	6	20	apical
6501	5	6	20	apical
6562	6	7.33333	20	apical
6400	6	6.83333	20	apical
6407	4	6.5	20	apical
6408	4	7	20	apical
5722	8	5.875	20	apical
4713	9	6.33333	20	apical
6335	4	6.25	20	apical
6334	5	6	20	apical
6406	4	6.75	20	apical
6566	6	5.66667	20	apical
6425	6	6.16667	20	apical
6624	4	5.75	20	apical
6401	5	5.6	20	apical
6620	7	6.28571	20	apical
6424	8	5.875	20	apical
6617	3	7.33333	20	apical
6464	6	6.66667	20	apical
6622	8	6.625	20	apical
6619	4	7.5	20	apical
6410	7	6	20	apical
6411	4	7.25	20	apical
6503	6	6.66667	20	apical
6511	3	5.5	20	apical
6496	5	6.2	20	apical
6567	4	7	20	apical
5850	9	5.28571	20	apical
6642	7	6	20	apical
6623	4	5.75	20	apical
6420	5	6.4	20	apical
621	6	6	20	basal
296	6	6	20	basal
993	5	6.4	20	basal
729	4	6.5	20	basal
28	7	6	20	basal
730	6	6.66667	20	basal
947	6	6	20	basal
261	7	6.28571	20	basal
1056	6	6.83333	20	basal
5	5	6.6	20	basal
219	5	6.4	20	basal
919	7	5.85714	20	basal
259	5	6.8	20	basal
831	5	6.4	20	basal
1108	6	6.83333	20	basal
268	6	6	20	basal
275	7	6.33333	20	basal
622	6	6.33333	20	basal
870	7	5.85714	20	basal
578	8	5.875	20	basal
1039	5	6.6	20	basal
1009	9	5.77778	20	basal
1021	7	5.5	20	basal
1020	5	6.6	20	basal
894	7	5.3	20	basal
332	5	6.2	20	basal
1109	6	6.33333	20	basal
186	10	5.7	20	basal
1008	7	6	20	basal
999	7	6.14286	20	basal
83	6	6.33333	20	basal
777	6	6.16667	20	basal
970	8	5.875	20	basal
1043	4	6.75	20	basal
1115	6	5.5	20	basal
11	6	6.16667	20	basal
171	4	7	20	basal
281	7	5.85714	20	basal
1025	5	6.4	20	basal
24	6	6.16667	20	basal
1026	6	6	20	basal
97	7	5.71429	20	basal
607	6	6.16667	20	basal
175	6	6.5	20	basal
25	5	6.6	20	basal
288	6	6.5	20	basal
13	8	5.625	20	basal
860	9	6.11111	20	basal
247	5	5.4	20	basal
943	6	6.33333	20	basal
720	5	6.875	20	basal
1080	6	6.7	20	basal
14	5	6.6	20	basal
750	5	6.875	20	basal
17	7	5.85714	20	basal
977	7	5.85714	20	basal
1007	5	7	20	basal
26	5	6	20	basal
16	6	6	20	basal
747	6	6.16667	20	basal
377	6	5.33333	20	basal
927	5	6.2	20	basal
333	6	6	20	basal
222	8	5.875	20	basal
1053	5	7	20	basal
1033	6	6.33333	20	basal
722	7	5.85714	20	basal
306	8	5.5	20	basal
1086	6	6.3	20	basal
804	7	6.14286	20	basal
409	6	5.66667	20	basal
723	7	6.42857	20	basal
1111	9	5.44444	20	basal
410	5	6	20	basal
598	5	6.4	20	basal
922	7	6.14286	20	basal
974	6	6.66667	20	basal
406	7	6	20	basal
143	6	5.66667	20	basal
391	4	6.33333	20	basal
856	6	6.1	20	basal
806	6	6.33333	20	basal
957	5	6.8	20	basal
20	6	5.83333	20	basal
472	8	6	20	basal
978	5	6.8	20	basal
405	3	7	20	basal
1023	4	6.75	20	basal
958	6	6.5	20	basal
610	7	6.28571	20	basal
177	6	6.83333	20	basal
833	6	5.66667	20	basal
1010	6	6	20	basal
888	5	7.2	20	basal
23	7	6	20	basal
762	6	6.16667	20	basal
1027	5	6.2	20	basal
1112	4	7	20	basal
1087	6	6	20	basal
763	6	6.16667	20	basal
407	7	5.71429	20	basal
305	6	6.3	20	basal
1077	4	6.5	20	basal
1076	3	6.75	20	basal
342	8	5.75	20	basal
623	7	6	20	basal
314	6	6.5	20	basal
881	6	5.5	20	basal
1084	5	7	20	basal
960	5	6.75	20	basal
834	5	6	20	basal
907	7	5.71429	20	basal
1046	4	6.75	20	basal
992	6	6.16667	20	basal
656	8	5.75	20	basal
721	8	6	20	basal
206	7	6.14286	20	basal
872	5	7	20	basal
612	7	6.57143	20	basal
220	8	5.875	20	basal
699	7	5.85714	20	basal
368	5	5.6	20	basal
1116	6	5.83333	20	basal
1001	5	6.2	20	basal
1002	7	6.14286	20	basal
376	6	5.66667	20	basal
360	7	5.71429	20	basal
81	6	6.16667	20	basal
348	6	6.16667	20	basal
820	7	5.85714	20	basal
1092	5	5.4	20	basal
1091	7	5.85714	20	basal
613	7	6.42857	20	basal
245	7	5.57143	20	basal
826	6	5.66667	20	basal
778	9	5.77778	20	basal
1068	5	6.6	20	basal
1040	4	7.25	20	basal
836	6	6.16667	20	basal
1110	7	5.71429	20	basal
1078	4	6.75	20	basal
880	7	5.85714	20	basal
600	7	6	20	basal
387	6	5.5	20	basal
359	5	6.6	20	basal
361	6	6.16667	20	basal
624	5	7	20	basal
745	6	5.83333	20	basal
724	6	6	20	basal
626	8	5.875	20	basal
926	6	6.16667	20	basal
1063	7	6	20	basal
1064	4	7.5	20	basal
711	7	6.14286	20	basal
422	5	6.8	20	basal
75	7	6	20	basal
423	6	6.16667	20	basal
77	5	5.8	20	basal
363	6	6.33333	20	basal
61	8	5.375	20	basal
1065	7	6.14286	20	basal
215	6	6.16667	20	basal
226	7	5.57143	20	basal
602	7	6.57143	20	basal
584	4	7	20	basal
1089	6	6.33333	20	basal
1047	5	6.8	20	basal
990	7	5.66667	20	basal
141	8	6.375	20	basal
425	7	6	20	basal
89	5	6.4	20	basal
78	5	6	20	basal
923	6	6.16667	20	basal
66	4	6.25	20	basal
701	6	6.5	20	basal
751	6	6.66667	20	basal
401	7	6	20	basal
837	6	6.5	20	basal
85	4	6.25	20	basal
1101	6	5.5	20	basal
585	8	6	20	basal
1117	6	6.33333	20	basal
91	7	6.28571	20	basal
403	6	6.16667	20	basal
362	7	5.85714	20	basal
1097	5	5.6	20	basal
98	4	7.25	20	basal
491	9	5.66667	20	basal
101	5	6.8	20	basal
480	6	6.33333	20	basal
467	6	6	20	basal
99	6	6	20	basal
447	5	6.2	20	basal
103	7	5.71429	20	basal
482	5	6.4	20	basal
95	6	5.83333	20	basal
469	6	6.16667	20	basal
876	6	6	20	basal
497	8	5.75	20	basal
753	5	6.4	20	basal
946	4	6.75	20	basal
494	7	6	20	basal
104	6	6.5	20	basal
885	5	6.6	20	basal
738	7	6.14286	20	basal
116	5	6.2	20	basal
516	7	6.14286	20	basal
108	7	5.85714	20	basal
508	6	6.16667	20	basal
905	6	5.83333	20	basal
521	6	6	20	basal
548	6	6.66667	20	basal
538	5	6.4	20	basal
178	4	7	20	basal
118	6	6	20	basal
531	7	5.28571	20	basal
180	7	6.28571	20	basal
1103	5	6.6	20	basal
567	6	6.16667	20	basal
781	8	6	20	basal
539	7	6.14286	20	basal
906	6	6	20	basal
523	6	6.66667	20	basal
540	7	5.71429	20	basal
509	8	5.5	20	basal
1052	4	7	20	basal
838	5	6.5	20	basal
558	5	6	20	basal
123	6	6.33333	20	basal
533	5	7.2	20	basal
546	6	6.16667	20	basal
117	5	6.2	20	basal
1045	4	6.5	20	basal
128	8	5.875	20	basal
1104	7	5.71429	20	basal
603	4	7.25	20	basal
712	8	5.75	20	basal
1105	7	6	20	basal
225	6	6.16667	20	basal
181	7	6.14286	20	basal
765	6	7	20	basal
1041	4	7	20	basal
124	5	6.8	20	basal
1072	4	6.75	20	basal
570	7	5.57143	20	basal
1071	4	6.75	20	basal
138	6	6	20	basal
212	5	6.25	20	basal
877	6	5.8	20	basal
590	7	5.57143	20	basal
126	6	6.33333	20	basal
605	5	6.8	20	basal
1119	6	6.5	20	basal
579	6	6.5	20	basal
174	6	6	20	basal
767	7	5.85714	20	basal
616	8	5.625	20	basal
1114	5	6.2	20	basal
289	5	5.75	20	basal
628	7	5.4	20	basal
631	5	6.4	20	basal
1095	8	5.875	20	basal
649	6	6	20	basal
650	5	6.2	20	basal
674	9	6	20	basal
1088	4	6.75	20	basal
1090	7	6.28571	20	basal
643	7	6.28571	20	basal
667	5	6.4	20	basal
651	5	6.6	20	basal
653	6	6.16667	20	basal
675	7	5.71429	20	basal
1067	4	6.75	20	basal
1066	5	6.2	20	basal
1113	6	6.16667	20	basal
660	4	6.75	20	basal
695	7	6	20	basal
673	6	6.16667	20	basal
158	4	7	20	basal
1038	4	7	20	basal
677	7	5.42857	20	basal
661	6	5.33333	20	basal
400	6	5.5	20	basal
1003	5	5.5	20	basal
682	6	5.16667	20	basal
706	6	6.33333	20	basal
684	7	6.14286	20	basal
669	6	6	20	basal
164	6	6	20	basal
693	6	5.66667	20	basal
157	4	7.25	20	basal
1036	4	8	20	basal
697	5	6.4	20	basal
160	4	6.75	20	basal
704	5	6.2	20	basal
476	7	5.85714	20	basal
169	6	6	20	basal
685	7	5.57143	20	basal
899	6	5.33333	20	basal
404	6	6	20	basal
320	4	6.75	20	basal
744	7	5.2	20	basal
671	7	6	20	basal
761	5	5.8	20	basal
408	7	5.71429	20	basal
201	4	6.75	20	basal
795	6	6.16667	20	basal
343	6	6.16667	20	basal
202	6	5.33333	20	basal
803	5	6.4	20	basal
785	7	6	20	basal
198	7	5.57143	20	basal
773	6	6.66667	20	basal
786	5	6.8	20	basal
787	5	6.6	20	basal
776	7	6	20	basal
200	7	6.14286	20	basal
196	6	5.83333	20	basal
213	7	6	20	basal
790	6	6.33333	20	basal
339	4	7.25	20	basal
1079	4	7	20	basal
1037	5	6.4	20	basal
696	6	6.16667	20	basal
825	5	6.6	20	basal
227	6	6.16667	20	basal
411	5	6.6	20	basal
810	5	6	20	basal
793	7	5.57143	20	basal
1050	4	6.75	20	basal
207	5	6.2	20	basal
879	7	6	20	basal
841	7	6.14286	20	basal
364	7	6.28571	20	basal
862	6	6.16667	20	basal
861	6	6.33333	20	basal
843	5	6.2	20	basal
882	6	6.33333	20	basal
216	6	5.83333	20	basal
708	5	6.6	20	basal
807	7	6.14286	20	basal
866	6	6	20	basal
886	5	6.4	20	basal
236	7	6	20	basal
908	7	6	20	basal
900	7	6	20	basal
904	6	6.5	20	basal
929	7	6.14286	20	basal
910	6	6.33333	20	basal
818	7	5.71429	20	basal
941	7	6	20	basal
918	8	6.25	20	basal
911	5	6.4	20	basal
917	5	6.4	20	basal
1051	5	6.8	20	basal
1042	4	6.75	20	basal
889	6	6	20	basal
1048	4	6.5	20	basal
962	7	6	20	basal
823	7	6	20	basal
1004	6	6.33333	20	basal
939	7	5.85714	20	basal
942	5	6.8	20	basal
975	8	6.125	20	basal
1035	6	6.5	20	basal
952	6	5.625	20	basal
434	4	7	20	basal
969	4	7	20	basal
971	4	7.25	20	basal
283	7	6.75	20	basal
319	5	6.6	20	basal
335	8	5.125	20	basal
350	6	5.83333	20	basal
955	5	6.2	20	basal
1085	4	6	20	basal
344	6	6.16667	20	basal
1054	3	7.33333	20	basal
1061	4	6.75	20	basal
1062	5	7.2	20	basal
550	7	5.71429	20	basal
1118	5	6	20	basal
1107	5	6	20	basal
1070	5	6.6	20	basal
1049	4	6.75	20	basal
1073	4	7	20	basal
1074	5	6.4	20	basal
552	7	5.4	20	basal
2320	6	5.66667	40	apical
2488	7	5.4	40	apical
2483	4	7.33333	40	apical
2482	6	6.4	40	apical
2480	5	5.8	40	apical
2481	6	5.66667	40	apical
2479	6	5.4	40	apical
2554	5	6.8	40	apical
2538	7	6.14286	40	apical
1953	4	6	40	apical
2544	5	7	40	apical
2485	9	5.77778	40	apical
2323	6	5.5	40	apical
2553	5	6.4	40	apical
2250	6	7.33333	40	apical
2191	5	5.4	40	apical
2540	5	5.6	40	apical
2402	6	6.83333	40	apical
2477	4	6.25	40	apical
2456	7	5.25	40	apical
2455	6	5.16667	40	apical
2478	7	5.2	40	apical
2173	9	5.66667	40	apical
2059	5	7	40	apical
2386	8	6.125	40	apical
2549	5	6.2	40	apical
2251	6	6.5	40	apical
2015	4	7	40	apical
2462	5	5.5	40	apical
2401	8	5.625	40	apical
2548	4	7	40	apical
2528	7	6	40	apical
2476	7	5.85714	40	apical
2546	5	6	40	apical
2344	8	5.375	40	apical
2132	6	5.83333	40	apical
2302	8	5.9	40	apical
2458	6	5.66667	40	apical
2050	7	4.875	40	apical
2547	8	5.5	40	apical
2094	8	5.58333	40	apical
2138	5	5.25	40	apical
2558	4	7	40	apical
2560	6	6.16667	40	apical
2091	8	5.08333	40	apical
2062	4	6.16667	40	apical
2531	5	6.375	40	apical
2472	6	4.9	40	apical
2079	4	6.5	40	apical
2025	7	6.14286	40	apical
2081	5	6.4	40	apical
2470	5	6.75	40	apical
2305	6	5	40	apical
2403	6	7.33333	40	apical
2559	6	6	40	apical
2471	6	5.83333	40	apical
2467	4	6.25	40	apical
2543	6	5.2	40	apical
2534	7	5.33333	40	apical
2230	6	6	40	apical
2154	6	7.125	40	apical
2317	4	6.25	40	apical
2047	8	6.25	40	apical
2085	6	6.16667	40	apical
2519	7	5.3	40	apical
2229	5	5.6	40	apical
2231	7	5.57143	40	apical
2226	7	5.14286	40	apical
2536	7	6	40	apical
2459	6	6	40	apical
2367	8	5.21429	40	apical
2535	5	6.2	40	apical
2450	3	7.33333	40	apical
2248	7	6.3	40	apical
2461	7	5.83333	40	apical
2552	6	6	40	apical
2551	7	5.42857	40	apical
2533	5	6.125	40	apical
2562	9	5.77778	40	apical
2169	6	6.16667	40	apical
2096	4	6.5	40	apical
2526	7	5.4	40	apical
2423	5	5.8	40	apical
2522	4	5.33333	40	apical
2391	5	6	40	apical
2029	6	6.33333	40	apical
2435	5	6.2	40	apical
1962	5	6.6	40	apical
2172	5	7	40	apical
2341	8	6.125	40	apical
1959	7	6	40	apical
2530	9	5.77778	40	apical
2112	7	6.14286	40	apical
2545	4	6.75	40	apical
2220	6	6.33333	40	apical
2537	5	7.2	40	apical
2116	4	5.83333	40	apical
2174	8	6	40	apical
2422	5	5.8	40	apical
2308	5	6	40	apical
2439	4	6.5	40	apical
2561	6	6.6	40	apical
2366	5	6.8	40	apical
2556	6	6	40	apical
2527	4	5.75	40	apical
2523	5	5.4	40	apical
2555	5	6.8	40	apical
2444	5	6.8	40	apical
1965	4	5.33333	40	apical
2557	7	5.57143	40	apical
2443	4	6.75	40	apical
2346	6	5.6	40	apical
2449	5	6.8	40	apical
2385	5	6	40	apical
2484	4	6.66667	40	apical
2437	4	6.25	40	apical
2525	5	6.66667	40	apical
2373	6	4.875	40	apical
2377	4	7.33333	40	apical
2451	8	5.5	40	apical
2518	5	6	40	apical
2430	5	7	40	apical
2432	5	5.4	40	apical
2529	4	7.25	40	apical
1990	7	5.85714	40	apical
2539	4	5.5	40	apical
2433	6	6.16667	40	apical
2628	8	5.42857	40	basal
2905	7	5.42857	40	basal
2810	5	6	40	basal
2518	7	6.28571	40	basal
2712	6	5.75	40	basal
2923	5	5.2	40	basal
2656	5	6.2	40	basal
2777	7	5.71429	40	basal
3011	7	5.71429	40	basal
2555	5	6	40	basal
2875	7	6	40	basal
3007	6	5.5	40	basal
2638	7	5.71429	40	basal
2878	4	6.5	40	basal
2848	6	6.33333	40	basal
2945	4	6.75	40	basal
2660	6	5.5	40	basal
2619	4	6.25	40	basal
2886	6	6	40	basal
2887	6	5.83333	40	basal
2888	5	6.4	40	basal
2730	6	6.33333	40	basal
2813	7	6	40	basal
2876	5	6.6	40	basal
2890	9	5.44444	40	basal
2891	5	6.6	40	basal
2880	6	5.33333	40	basal
2805	6	6.5	40	basal
2918	5	6.2	40	basal
2896	6	6.16667	40	basal
2889	6	5.83333	40	basal
2517	7	6.33333	40	basal
2911	7	6.28571	40	basal
2897	6	5.83333	40	basal
2901	5	6.8	40	basal
2907	7	6	40	basal
2908	7	6.28571	40	basal
2883	7	6.25	40	basal
2988	9	5.33333	40	basal
2998	4	6	40	basal
2910	6	6.5	40	basal
2938	4	7.5	40	basal
2898	5	5.4	40	basal
2913	5	6	40	basal
2595	6	6.16667	40	basal
2519	6	5.66667	40	basal
2909	6	5.66667	40	basal
2613	7	5.85714	40	basal
2999	5	6.25	40	basal
2541	6	6	40	basal
2540	7	5.71429	40	basal
2662	6	6	40	basal
2539	8	6	40	basal
2912	5	6.2	40	basal
2757	5	6.2	40	basal
2627	6	6	40	basal
2612	6	6.33333	40	basal
2794	6	6.4	40	basal
2729	7	5.6	40	basal
2790	6	6.16667	40	basal
2632	5	6.2	40	basal
2939	6	6	40	basal
2520	5	6.6	40	basal
2989	5	6.375	40	basal
2634	5	6	40	basal
2959	4	6.66667	40	basal
2631	6	6.16667	40	basal
3010	4	6.5	40	basal
2785	6	5.33333	40	basal
2935	4	6	40	basal
2574	8	5.71429	40	basal
2851	5	6	40	basal
2625	5	6.4	40	basal
2635	5	6	40	basal
2856	6	6.16667	40	basal
3012	4	5.75	40	basal
2531	6	5.8	40	basal
2573	5	6.4	40	basal
2984	6	5.83333	40	basal
2642	5	6.25	40	basal
2934	4	6	40	basal
2643	8	5.85714	40	basal
2821	7	5.57143	40	basal
2591	5	6.4	40	basal
2597	8	5.25	40	basal
2940	5	6.6	40	basal
2840	5	6.4	40	basal
2765	8	5.75	40	basal
2649	6	6.33333	40	basal
2843	7	6	40	basal
2644	4	6.75	40	basal
2857	6	5.7	40	basal
2550	6	6.1	40	basal
2970	5	6	40	basal
2949	3	8	40	basal
2614	6	6	40	basal
2947	5	6.2	40	basal
2881	7	6.1	40	basal
2655	6	6.125	40	basal
3006	6	5.66667	40	basal
2985	5	6.4	40	basal
2747	6	6.16667	40	basal
2711	8	5.375	40	basal
2620	4	6.75	40	basal
2572	6	6	40	basal
3036	5	6.6	40	basal
2957	5	6.4	40	basal
2834	5	5.875	40	basal
2651	5	6.6	40	basal
2745	7	6.14286	40	basal
2849	5	6.2	40	basal
2882	4	5.5	40	basal
2565	7	5.85714	40	basal
2568	6	5.83333	40	basal
2738	7	6	40	basal
2933	4	7.5	40	basal
2841	8	5.42857	40	basal
2653	4	7	40	basal
2860	7	6	40	basal
2546	5	6.4	40	basal
2770	7	5.85714	40	basal
3037	6	6.16667	40	basal
2577	6	6.5	40	basal
2926	5	6.8	40	basal
2932	4	6.25	40	basal
2528	6	6.66667	40	basal
2997	7	5.75	40	basal
2527	7	5.71429	40	basal
2659	7	5.66667	40	basal
2948	3	7	40	basal
2674	5	6.125	40	basal
2608	8	6.125	40	basal
2609	5	7	40	basal
2533	7	5.85714	40	basal
2624	7	5.71429	40	basal
2523	5	6.8	40	basal
2576	5	6.6	40	basal
2667	6	6.16667	40	basal
2753	4	6.25	40	basal
2596	7	5.71429	40	basal
2760	7	5.85714	40	basal
2681	6	6.33333	40	basal
2547	6	6.5	40	basal
2780	10	5.7	40	basal
3003	5	7	40	basal
3001	7	6	40	basal
2742	7	5.71429	40	basal
2578	6	6.33333	40	basal
2637	5	6.4	40	basal
2931	7	6.28571	40	basal
2661	7	5.58333	40	basal
2666	5	6.4	40	basal
2751	6	6	40	basal
2671	6	6	40	basal
2826	6	6.16667	40	basal
2769	7	6.28571	40	basal
2839	7	6.42857	40	basal
2776	4	7.75	40	basal
2853	5	6.2	40	basal
2953	5	6.6	40	basal
2525	6	5.375	40	basal
2781	6	6	40	basal
2734	5	6.2	40	basal
2904	5	6.4	40	basal
2676	8	5.875	40	basal
2946	5	6.4	40	basal
2672	5	6	40	basal
3000	6	6.3	40	basal
2925	4	6.75	40	basal
2951	4	6.5	40	basal
3023	7	5.85714	40	basal
2863	6	5.66667	40	basal
2669	7	5.57143	40	basal
2679	5	6.6	40	basal
2675	4	6.75	40	basal
2894	7	6.14286	40	basal
2580	6	6.5	40	basal
2899	6	6.66667	40	basal
2639	6	6	40	basal
2982	6	6	40	basal
2943	5	7	40	basal
3019	9	5.44444	40	basal
2850	5	5.6	40	basal
2779	5	6.4	40	basal
2803	9	5.77778	40	basal
2526	6	6.5	40	basal
2861	5	6.8	40	basal
2684	6	6.66667	40	basal
2768	6	6	40	basal
2903	5	7.2	40	basal
2682	6	5.9	40	basal
2944	4	7	40	basal
2685	6	6.66667	40	basal
2670	7	6.08333	40	basal
2778	8	5.58333	40	basal
2885	7	6.14286	40	basal
2657	6	5.83333	40	basal
2715	5	6.125	40	basal
3021	10	5.5	40	basal
2924	6	5.83333	40	basal
2783	6	6.5	40	basal
2535	6	5.66667	40	basal
2872	5	5.25	40	basal
2647	5	6.8	40	basal
2692	8	5.875	40	basal
2928	4	7.25	40	basal
2873	8	5.64286	40	basal
2802	6	6.33333	40	basal
2690	7	6	40	basal
2650	7	6.71429	40	basal
2754	6	6	40	basal
2697	7	6	40	basal
2929	4	6.5	40	basal
2752	4	6.25	40	basal
2586	7	5.9	40	basal
2588	6	6.125	40	basal
2585	7	5.71429	40	basal
2811	5	6.8	40	basal
2579	5	7	40	basal
2877	8	6	40	basal
2846	6	6.33333	40	basal
2746	6	5.66667	40	basal
2558	6	6.33333	40	basal
2798	6	6	40	basal
2713	6	6.33333	40	basal
2862	5	7.4	40	basal
2529	6	6	40	basal
2731	6	5.83333	40	basal
2793	6	5.83333	40	basal
2833	6	6	40	basal
2605	7	6.28571	40	basal
2958	5	6.2	40	basal
2965	4	7.75	40	basal
2589	5	6.6	40	basal
2694	5	6.6	40	basal
2561	7	6	40	basal
2530	5	6.4	40	basal
2699	7	5.57143	40	basal
2739	6	5.66667	40	basal
2594	7	6	40	basal
2548	7	5.3	40	basal
2983	5	6.4	40	basal
2981	6	6.5	40	basal
2801	7	5.85714	40	basal
2641	5	6.2	40	basal
2816	7	5.85714	40	basal
2658	8	5.625	40	basal
2665	5	6.6	40	basal
2784	6	6	40	basal
2804	5	6	40	basal
2859	5	6.4	40	basal
2788	5	6.125	40	basal
2963	5	6.6	40	basal
2606	8	5.625	40	basal
2964	5	5.8	40	basal
2703	6	5.83333	40	basal
2967	5	6.2	40	basal
2677	5	6.4	40	basal
2611	7	5.57143	40	basal
2795	8	5.875	40	basal
2749	6	6.33333	40	basal
2563	5	6.6	40	basal
2867	5	5.8	40	basal
2709	6	6.33333	40	basal
2960	5	6.6	40	basal
2961	5	6.4	40	basal
2986	5	5.875	40	basal
2678	7	5.71429	40	basal
2719	8	5.5	40	basal
2767	7	6	40	basal
2808	6	6	40	basal
2716	6	6.1	40	basal
2825	6	6.1	40	basal
2727	5	6	40	basal
2869	4	7	40	basal
2995	5	5.83333	40	basal
2714	5	6.2	40	basal
2987	7	5.91667	40	basal
2792	4	6.83333	40	basal
2720	6	6	40	basal
2829	7	5.28571	40	basal
2994	5	6.66667	40	basal
2566	6	5.8	40	basal
2688	7	6.25	40	basal
2786	6	5.5	40	basal
2560	7	5	40	basal
2733	7	5.71429	40	basal
2728	6	5.83333	40	basal
2722	5	6.2	40	basal
2838	5	6.125	40	basal
2966	5	5.8	40	basal
2806	5	5.66667	40	basal
2976	4	6	40	basal
2622	5	6.25	40	basal
2799	6	6.16667	40	basal
2735	6	5.9	40	basal
2623	6	6.33333	40	basal
3024	5	6.4	40	basal
3022	8	6	40	basal
2610	6	5.83333	40	basal
2820	6	6.16667	40	basal
2645	5	6.4	40	basal
2975	5	6.8	40	basal
2874	6	5.83333	40	basal
2630	7	5.75	40	basal
2855	5	6.8	40	basal
2864	6	6.33333	40	basal
2534	6	5.7	40	basal
2691	6	5.83333	40	basal
2977	3	7.25	40	basal
2824	8	5.25	40	basal
2652	6	5.66667	40	basal
2915	5	6.6	40	basal
2895	6	6	40	basal
2725	7	5.9	40	basal
2972	5	6.2	40	basal
2569	5	6.4	40	basal
2598	7	5.57143	40	basal
3034	5	6	40	basal
2942	3	7.33333	40	basal
2996	3	7.5	40	basal
2930	5	6.2	40	basal
2764	6	6.16667	40	basal
2937	6	6.66667	40	basal
2900	7	5.71429	40	basal
2962	4	5.83333	40	basal
2971	5	6	40	basal
421	7	5.57143	60	apical
453	7	6.57143	60	apical
118	7	6.57143	60	apical
548	5	6.625	60	apical
399	9	5.28571	60	apical
323	7	6.28571	60	apical
119	6	6.33333	60	apical
781	5	6.2	60	apical
360	5	6	60	apical
185	7	6	60	apical
790	7	6.85714	60	apical
5	8	5.875	60	apical
552	6	6	60	apical
149	6	5.5	60	apical
108	9	5.77778	60	apical
572	9	6.55556	60	apical
6	7	5.16667	60	apical
334	4	6.25	60	apical
472	8	6.25	60	apical
333	4	6.5	60	apical
263	5	5.75	60	apical
493	7	6	60	apical
492	5	6.6	60	apical
158	8	6.21429	60	apical
176	4	7.75	60	apical
569	11	5.81818	60	apical
156	4	6.66667	60	apical
375	5	6.2	60	apical
51	5	7.2	60	apical
45	8	5.875	60	apical
563	6	6.16667	60	apical
186	7	6.42857	60	apical
388	5	6.6	60	apical
198	6	6.5	60	apical
568	5	7.2	60	apical
79	9	5.44444	60	apical
475	6	6	60	apical
574	5	6.2	60	apical
274	5	6.5	60	apical
369	5	7	60	apical
551	6	6.16667	60	apical
9	6	6.16667	60	apical
390	4	6.75	60	apical
491	9	5.33333	60	apical
447	5	6.4	60	apical
273	6	6	60	apical
171	6	6.5	60	apical
795	6	6.125	60	apical
557	6	6.33333	60	apical
75	7	6.28571	60	apical
487	5	6.4	60	apical
780	8	6	60	apical
328	4	6.5	60	apical
280	7	5.75	60	apical
539	8	5.42857	60	apical
216	6	6.16667	60	apical
208	6	6.1	60	apical
12	6	5.66667	60	apical
503	5	6.6	60	apical
444	5	7.125	60	apical
408	4	6.75	60	apical
415	6	5.5	60	apical
791	6	6.5	60	apical
792	6	6.66667	60	apical
363	5	6.8	60	apical
130	8	5.5	60	apical
306	8	5.375	60	apical
495	7	6.14286	60	apical
549	4	6.5	60	apical
524	8	6.5	60	apical
525	5	6.2	60	apical
372	6	6	60	apical
393	6	5.83333	60	apical
183	6	6.5	60	apical
125	9	5.77778	60	apical
346	6	5	60	apical
373	6	6	60	apical
111	5	6.6	60	apical
394	6	6	60	apical
395	5	6.8	60	apical
337	5	6.8	60	apical
371	6	6	60	apical
789	8	6	60	apical
496	7	6.14286	60	apical
516	8	5.25	60	apical
443	6	6.16667	60	apical
139	6	6.16667	60	apical
498	8	5.625	60	apical
520	7	5.14286	60	apical
146	7	6	60	apical
379	6	6.3	60	apical
445	5	7	60	apical
783	5	5.2	60	apical
11	5	6.8	60	apical
420	4	6	60	apical
34	9	5.33333	60	apical
757	4	5.16667	60	apical
517	5	6	60	apical
561	6	6.33333	60	apical
211	5	6.4	60	apical
357	6	6.66667	60	apical
356	6	7.16667	60	apical
147	8	5.875	60	apical
184	6	6.33333	60	apical
361	5	6	60	apical
405	6	5.83333	60	apical
497	8	5.75	60	apical
71	8	6.25	60	apical
29	8	6.25	60	apical
106	9	5.77778	60	apical
571	9	5.5625	60	apical
550	4	7.5	60	apical
380	4	6.75	60	apical
57	8	5.375	60	apical
504	6	5.625	60	apical
486	6	6.33333	60	apical
782	5	5.8	60	apical
477	4	6.83333	60	apical
365	4	7.5	60	apical
174	5	6.2	60	apical
227	7	5.71429	60	apical
232	6	6.66667	60	apical
437	5	6.4	60	apical
468	6	6	60	apical
163	6	7.33333	60	apical
457	7	6	60	apical
542	4	6	60	apical
308	6	5.5	60	apical
381	5	7	60	apical
494	7	5.85714	60	apical
204	5	6.6	60	apical
418	5	5.83333	60	apical
465	5	6.2	60	apical
22	7	5.42857	60	apical
529	6	5.5	60	apical
461	6	7	60	apical
258	7	6.42857	60	apical
168	6	6	60	apical
248	6	6	60	apical
479	8	6.125	60	apical
796	4	5.75	60	apical
396	6	6.16667	60	apical
151	6	5.5	60	apical
442	4	7.5	60	apical
374	5	6.6	60	apical
215	7	5.71429	60	apical
481	3	8.33333	60	apical
354	4	6.16667	60	apical
114	6	6.16667	60	apical
332	7	6	60	apical
368	5	7.4	60	apical
378	4	7	60	apical
456	3	8.33333	60	apical
480	9	6.44444	60	apical
403	5	6.2	60	apical
247	6	6.16667	60	apical
464	7	5.71429	60	apical
482	9	6.1875	60	apical
312	5	7	60	apical
234	6	6.33333	60	apical
329	7	5.57143	60	apical
419	5	6	60	apical
255	7	6.28571	60	apical
478	6	6.83333	60	apical
556	5	5.8	60	apical
402	6	6.33333	60	apical
42	8	5.75	60	apical
302	4	7.5	60	apical
473	6	6.5	60	apical
272	5	5.8	60	apical
404	5	6	60	apical
449	5	6.6	60	apical
547	5	6	60	apical
463	6	6.66667	60	apical
382	5	6.4	60	apical
471	3	7.66667	60	apical
120	5	6.4	60	apical
285	6	5.83333	60	apical
459	5	6.4	60	apical
243	4	7	60	apical
440	5	6.6	60	apical
230	4	6.75	60	apical
250	6	6.3	60	apical
754	7	5.83333	60	apical
507	7	6.14286	60	apical
502	4	6	60	apical
506	3	7.66667	60	apical
500	7	5.71429	60	apical
451	6	6.5	60	apical
284	6	6	60	apical
509	6	6.33333	60	apical
362	5	6.2	60	apical
327	6	6.66667	60	apical
436	6	6.8	60	apical
544	5	6.2	60	apical
793	5	5.6	60	apical
165	5	7	60	apical
489	5	7	60	apical
352	3	6.75	60	apical
508	5	6.8	60	apical
450	5	6.8	60	apical
98	9	5.8125	60	apical
297	6	5.5	60	apical
298	5	6.2	60	apical
55	6	6.33333	60	apical
469	5	6.6	60	apical
95	8	5.64286	60	apical
309	4	5.5	60	apical
200	7	5.85714	60	apical
330	6	5.83333	60	apical
353	5	6	60	apical
225	5	6	60	apical
344	7	5.71429	60	apical
385	5	6.4	60	apical
342	5	6.4	60	apical
167	6	5.83333	60	apical
257	5	6.4	60	apical
367	5	6.4	60	apical
292	6	6.33333	60	apical
245	6	5.83333	60	apical
573	8	5.875	60	apical
526	7	5.57143	60	apical
269	4	7.5	60	apical
430	6	6.16667	60	apical
555	5	6.6	60	apical
318	5	5.75	60	apical
470	5	6.5	60	apical
439	3	7.33333	60	apical
490	4	7	60	apical
462	4	7.5	60	apical
536	8	6.5	60	apical
441	5	6.2	60	apical
384	5	6.2	60	apical
476	6	5.9	60	apical
527	5	7.4	60	apical
558	4	7.25	60	apical
537	5	6.2	60	apical
321	4	6.25	60	apical
3	6	6.16667	60	basal
522	6	5.83333	60	basal
70	6	5.83333	60	basal
5	5	6.6	60	basal
692	6	6	60	basal
634	5	6.4	60	basal
294	7	5.85714	60	basal
17	6	6.16667	60	basal
563	6	6.16667	60	basal
562	5	7.2	60	basal
32	7	6.14286	60	basal
29	6	6.33333	60	basal
307	7	6	60	basal
523	6	6.5	60	basal
257	7	6.14286	60	basal
91	7	5.71429	60	basal
591	6	6.33333	60	basal
619	6	6.66667	60	basal
608	8	5.75	60	basal
196	8	6	60	basal
638	5	6	60	basal
569	7	6.14286	60	basal
297	4	6.5	60	basal
232	6	5.8	60	basal
68	7	5.85714	60	basal
721	6	6.5	60	basal
593	5	6.2	60	basal
292	7	5.83333	60	basal
371	6	6.3	60	basal
659	5	6.4	60	basal
340	6	6.16667	60	basal
295	5	6.4	60	basal
332	6	6.33333	60	basal
236	8	5.625	60	basal
541	6	6.16667	60	basal
651	6	6.16667	60	basal
282	7	6	60	basal
222	4	7	60	basal
204	6	6.16667	60	basal
290	6	6.16667	60	basal
237	7	6	60	basal
649	6	6	60	basal
25	6	6.16667	60	basal
745	5	7	60	basal
215	6	6	60	basal
259	8	5.75	60	basal
656	7	6	60	basal
241	6	7	60	basal
632	5	6.6	60	basal
223	9	5.66667	60	basal
262	7	5.71429	60	basal
699	3	7.66667	60	basal
142	7	5.85714	60	basal
631	5	6.2	60	basal
693	4	6.75	60	basal
574	6	6.16667	60	basal
408	6	6.33333	60	basal
564	7	5.85714	60	basal
473	6	6.5	60	basal
149	6	6.5	60	basal
11	6	6	60	basal
650	5	6.4	60	basal
207	6	6.16667	60	basal
275	6	6	60	basal
220	8	5.875	60	basal
296	4	7	60	basal
261	5	6.8	60	basal
318	6	6.33333	60	basal
731	5	6.2	60	basal
730	6	5.83333	60	basal
221	6	6	60	basal
284	4	7	60	basal
733	7	5.85714	60	basal
453	6	6	60	basal
672	5	6.2	60	basal
603	6	6	60	basal
338	8	5.875	60	basal
694	5	6.6	60	basal
618	6	6.16667	60	basal
517	6	6.16667	60	basal
633	7	6	60	basal
565	6	5.83333	60	basal
516	8	5.625	60	basal
163	5	6.4	60	basal
566	7	5.85714	60	basal
30	6	6	60	basal
463	7	5.57143	60	basal
281	5	6.2	60	basal
440	5	6.6	60	basal
681	4	7	60	basal
331	7	6.14286	60	basal
302	6	6.5	60	basal
655	4	7.25	60	basal
744	7	5.85714	60	basal
431	7	5.57143	60	basal
173	6	5.66667	60	basal
348	7	6.14286	60	basal
225	5	5.6	60	basal
283	5	6.2	60	basal
127	5	6.4	60	basal
602	6	6.16667	60	basal
573	7	5.85714	60	basal
341	6	6.33333	60	basal
239	4	7.25	60	basal
645	6	6	60	basal
676	5	6.2	60	basal
722	6	6.5	60	basal
518	6	6.33333	60	basal
495	7	5.85714	60	basal
43	5	6.6	60	basal
482	6	6.16667	60	basal
726	7	5.71429	60	basal
126	6	6	60	basal
673	6	6.5	60	basal
402	7	5.85714	60	basal
305	6	6.5	60	basal
35	6	6.16667	60	basal
369	5	6.8	60	basal
470	6	6.16667	60	basal
515	6	5.83333	60	basal
445	6	5.83333	60	basal
660	5	7.4	60	basal
629	7	5.85714	60	basal
727	7	6.14286	60	basal
449	5	6.4	60	basal
400	7	5.85714	60	basal
366	6	6.16667	60	basal
403	6	6.16667	60	basal
407	7	6	60	basal
732	4	6.5	60	basal
725	4	7.5	60	basal
409	5	6.2	60	basal
416	6	6	60	basal
718	6	6.33333	60	basal
675	5	6.6	60	basal
65	7	5.85714	60	basal
628	6	6	60	basal
391	5	6.4	60	basal
493	6	6.33333	60	basal
444	5	6.4	60	basal
478	6	6	60	basal
447	5	6.2	60	basal
404	6	6.33333	60	basal
421	6	6.16667	60	basal
310	6	6.16667	60	basal
379	8	5.875	60	basal
313	6	6.16667	60	basal
479	7	6.28571	60	basal
452	7	5.71429	60	basal
481	6	6	60	basal
392	5	6.8	60	basal
646	6	6.16667	60	basal
455	7	6.42857	60	basal
487	6	6.5	60	basal
489	6	5.83333	60	basal
477	6	6.16667	60	basal
703	4	7.25	60	basal
519	7	5.85714	60	basal
40	4	6.5	60	basal
60	7	6.14286	60	basal
491	6	5.83333	60	basal
494	6	6.16667	60	basal
570	6	5.83333	60	basal
324	6	6.66667	60	basal
647	4	7	60	basal
319	6	6.16667	60	basal
320	5	6	60	basal
617	6	5.83333	60	basal
315	6	6.16667	60	basal
590	9	5.55556	60	basal
330	6	6.5	60	basal
613	5	6.4	60	basal
99	9	5.88889	60	basal
335	6	5.83333	60	basal
644	4	6.75	60	basal
337	5	6.8	60	basal
134	6	5.5	60	basal
657	5	6.4	60	basal
695	5	6.6	60	basal
208	6	6.16667	60	basal
129	8	5.375	60	basal
704	4	7	60	basal
131	5	6.8	60	basal
450	7	6.42857	60	basal
475	6	6	60	basal
599	6	6.5	60	basal
454	6	6.16667	60	basal
520	7	6	60	basal
342	7	6.42857	60	basal
677	6	5.83333	60	basal
346	7	5.85714	60	basal
658	4	7	60	basal
82	7	5.85714	60	basal
702	5	6.8	60	basal
79	7	6.14286	60	basal
734	7	6	60	basal
80	5	6.6	60	basal
706	5	6.6	60	basal
84	6	6.5	60	basal
[truncated: 3,560 more rows]
