# Supplementary material for: 3D cell neighbour dynamics in growing pseudostratified epithelia
Source: eLife. 2021 Oct 5;10:e68135. doi: 10.7554/eLife.68135 (PMC8570695; doi:10.7554/eLife.68135)
Supplement: Figure 7—source data 1. [file elife-68135-fig7-data1.xls]

## Sheet: data
cellId	timepoint	area	neighbours	layer
1	1	10.83	6	24
1	1	12.467	6	25
1	1	10.916	6	26
1	1	12.007	6	27
1	1	12.438	6	28
1	1	13.875	6	29
1	1	17.465	6	30
1	1	17.925	6	31
1	1	17.724	6	32
1	1	17.551	6	33
1	1	16.891	6	34
1	1	18.815	6	35
1	1	19.218	6	36
1	1	20.309	6	37
1	1	21.2	6	38
1	1	22.521	6	39
1	1	23.641	7	40
1	1	23.268	7	41
1	1	24.733	7	42
1	1	26.744	7	43
1	1	27.548	7	44
1	1	28.324	7	45
1	1	29.846	8	46
1	1	33.552	8	47
1	1	38.177	8	48
1	1	36.108	8	49
1	1	36.396	7	50
1	1	34.931	7	51
1	1	35.275	7	52
1	1	36.769	7	53
1	1	37.114	7	54
1	1	34.787	7	55
1	1	36.396	7	56
1	1	36.223	7	57
1	1	37.142	7	58
1	1	39.124	7	59
1	1	41.279	7	60
1	1	42.457	7	61
1	1	46.564	7	62
1	1	45.904	7	63
1	1	39.44	7	64
1	1	40.216	7	65
1	1	39.814	7	66
1	1	40.963	7	67
1	1	1.178	4	11
1	1	1.063	4	12
1	1	1.408	4	13
1	1	1.436	4	14
1	1	2.068	4	15
1	1	3.217	6	16
1	1	3.533	6	17
1	1	2.959	6	18
1	1	5.286	6	19
1	1	6.262	6	20
1	1	7.009	6	21
1	1	8.532	6	22
1	1	10.427	6	23
1	10	11.49	5	1
1	10	13.875	5	2
1	10	16.747	5	3
1	10	17.322	5	4
1	10	18.356	5	5
1	10	17.494	5	6
1	10	17.092	5	7
1	10	15.34	5	8
1	10	14.219	5	9
1	10	14.219	5	10
1	10	14.392	5	11
1	10	15.138	5	12
1	10	16.316	5	13
1	10	16.086	5	14
1	10	16.46	5	15
1	10	15.77	5	16
1	10	15.713	5	17
1	10	15.512	5	18
1	10	15.885	5	19
1	10	16.891	6	20
1	10	18.327	6	21
1	10	19.016	6	22
1	10	19.907	6	23
1	10	20.999	6	24
1	10	22.435	6	25
1	10	23.469	6	26
1	10	25.192	6	27
1	10	26.801	7	28
1	10	28.668	7	29
1	10	29.559	8	30
1	10	30.679	8	31
1	10	33.896	8	32
1	10	38.177	8	33
1	10	39.958	8	34
1	10	42.227	8	35
1	10	42.313	8	36
1	10	43.261	8	37
1	10	44.41	8	38
1	10	46.45	8	39
1	10	47.254	7	40
1	10	49.121	7	41
1	10	46.88	7	42
1	10	45.013	7	43
1	10	43.749	6	44
1	10	43.376	6	45
1	10	40.417	6	46
1	10	37.832	6	47
1	10	38.062	5	48
1	10	40.216	5	49
1	10	38.895	5	50
1	10	38.636	5	51
1	10	37.085	5	52
1	10	35.62	5	53
1	2	11.663	5	20
1	2	11.289	5	21
1	2	12.266	4	22
1	2	10.485	4	23
1	2	11.232	4	24
1	2	12.639	4	25
1	2	11.95	4	26
1	2	12.955	4	27
1	2	12.438	4	28
1	2	13.099	5	29
1	2	13.357	5	30
1	2	13.013	5	31
1	2	13.932	5	32
1	2	14.966	5	33
1	2	14.736	5	34
1	2	16.201	5	35
1	2	15.742	5	36
1	2	17.178	5	37
1	2	19.131	5	38
1	2	21.171	5	39
1	2	22.607	5	40
1	2	24.647	5	41
1	2	26.715	6	42
1	2	29.3	6	43
1	2	30.334	6	44
1	2	33.781	6	45
1	2	36.826	5	46
1	2	36.999	5	47
1	2	37.975	5	48
1	2	41.739	5	49
1	2	43.261	5	50
1	2	42.055	5	51
1	2	42.399	5	52
1	2	44.582	5	53
1	2	45.128	5	54
1	2	46.45	6	55
1	2	46.277	6	56
1	2	45.904	6	57
1	2	45.76	6	58
1	2	45.157	6	59
1	2	43.06	6	60
1	2	41.853	6	61
1	2	37.142	6	62
1	2	37.142	6	63
1	2	36.08	6	64
1	2	3.619	4	15
1	2	7.871	5	16
1	2	9.594	5	17
1	2	11.347	5	18
1	2	12.266	5	19
1	3	6.492	4	21
1	3	5.831	4	22
1	3	5.372	4	23
1	3	6.779	5	24
1	3	6.865	5	25
1	3	6.004	5	26
1	3	5.975	5	27
1	3	6.004	5	28
1	3	7.325	5	29
1	3	8.129	5	30
1	3	9.594	5	31
1	3	10.198	5	32
1	3	12.381	5	33
1	3	12.812	5	34
1	3	14.621	5	35
1	3	14.794	5	36
1	3	15.282	5	37
1	3	17.954	5	38
1	3	18.183	6	39
1	3	18.04	6	40
1	3	19.591	6	41
1	3	21.918	6	42
1	3	22.78	6	43
1	3	24.762	6	44
1	3	26.801	6	45
1	3	29.099	6	46
1	3	30.679	6	47
1	3	29.386	6	48
1	3	33.925	6	49
1	3	33.494	6	50
1	3	34.873	6	51
1	3	39.297	6	52
1	3	41.537	6	53
1	3	44.64	6	54
1	3	47.283	6	55
1	3	46.306	6	56
1	3	47.8	6	57
1	3	50.012	7	58
1	3	50.299	7	59
1	3	55.01	7	60
1	3	56.82	7	61
1	3	56.82	7	62
1	3	6.492	3	0
1	3	6.435	3	1
1	3	6.492	3	2
1	3	7.411	3	3
1	3	8.848	4	4
1	3	10.514	4	5
1	3	9.566	5	6
1	3	12.208	5	7
1	3	9.91	5	8
1	3	9.479	6	9
1	3	10.6	6	10
1	3	10.916	6	11
1	3	9.968	6	12
1	3	9.422	6	13
1	3	8.646	6	14
1	3	8.388	6	15
1	3	8.187	6	16
1	3	7.67	6	17
1	3	6.693	5	18
1	3	6.147	4	19
1	3	5.343	4	20
1	4	3.878	4	21
1	4	4.366	4	22
1	4	3.706	4	23
1	4	4.079	4	24
1	4	4.654	4	25
1	4	5.257	5	26
1	4	6.119	5	27
1	4	7.411	5	28
1	4	7.813	4	29
1	4	7.526	4	30
1	4	8.991	4	31
1	4	10.657	4	32
1	4	13.444	4	33
1	4	14.277	5	34
1	4	15.426	5	35
1	4	17.753	5	36
1	4	19.476	6	37
1	4	21.343	6	38
1	4	23.641	7	39
1	4	23.67	6	40
1	4	26.054	6	41
1	4	27.06	6	42
1	4	27.72	6	43
1	4	28.496	6	44
1	4	30.88	6	45
1	4	32.575	6	46
1	4	33.121	6	47
1	4	32.604	6	48
1	4	32.632	7	49
1	4	34.126	7	50
1	4	35.304	7	51
1	4	35.304	7	52
1	4	38.177	7	53
1	4	38.32	7	54
1	4	38.521	7	55
1	4	42.572	7	56
1	4	41.135	7	57
1	4	43.864	7	58
1	4	44.611	7	59
1	4	49.782	8	60
1	4	52.109	8	61
1	4	55.383	8	62
1	4	57.94	8	63
1	4	60.525	8	64
1	4	64.489	8	65
1	4	10.715	4	0
1	4	12.122	4	1
1	4	11.433	4	2
1	4	11.347	4	3
1	4	11.347	4	4
1	4	10.169	4	5
1	4	8.675	4	6
1	4	9.049	4	7
1	4	8.273	4	8
1	4	6.693	4	9
1	4	6.32	4	10
1	4	6.406	4	11
1	4	4.567	4	12
1	4	4.165	4	13
1	4	4.338	5	14
1	4	4.28	5	15
1	4	4.309	5	16
1	4	4.108	5	17
1	4	4.05	4	18
1	4	3.677	4	19
1	4	3.821	4	20
1	5	11.174	5	18
1	5	10.169	5	19
1	5	10.427	5	20
1	5	10.542	5	21
1	5	10.399	5	22
1	5	11.088	5	23
1	5	11.634	5	24
1	5	11.72	5	25
1	5	13.559	5	26
1	5	13.185	5	27
1	5	14.679	5	28
1	5	15.627	5	29
1	5	17.753	5	30
1	5	20.711	6	31
1	5	23.584	6	32
1	5	25.221	6	33
1	5	27.117	7	34
1	5	28.036	7	35
1	5	29.013	7	36
1	5	31.024	7	37
1	5	34.241	7	38
1	5	34.988	7	39
1	5	39.239	7	40
1	5	40.36	7	41
1	5	42.256	8	42
1	5	43.491	8	43
1	5	43.548	8	44
1	5	43.548	8	45
1	5	42.428	8	46
1	5	40.072	7	47
1	5	42.514	7	48
1	5	40.733	7	49
1	5	40.245	7	50
1	5	38.062	6	51
1	5	36.396	6	52
1	5	33.896	6	53
1	5	29.817	6	54
1	5	29.904	6	55
1	5	28.381	6	56
1	5	28.984	6	57
1	5	28.209	6	58
1	5	25.911	6	59
1	5	24.474	6	60
1	5	26.083	6	61
1	5	27.203	6	62
1	5	24.704	5	63
1	5	26.37	5	64
1	5	28.123	5	65
1	5	28.898	5	66
1	5	13.788	5	0
1	5	12.036	5	1
1	5	11.576	5	2
1	5	10.945	5	3
1	5	9.939	5	4
1	5	9.422	5	5
1	5	10.341	5	6
1	5	10.916	5	7
1	5	10.427	5	8
1	5	10.485	5	9
1	5	10.169	4	10
1	5	11.002	5	11
1	5	11.232	5	12
1	5	11.663	5	13
1	5	11.462	5	14
1	5	11.347	5	15
1	5	11.232	5	16
1	5	11.921	5	17
1	6	19.246	7	14
1	6	18.844	7	15
1	6	18.413	6	16
1	6	18.528	6	17
1	6	18.7	6	18
1	6	18.011	6	19
1	6	17.666	6	20
1	6	17.322	6	21
1	6	18.787	6	22
1	6	19.993	5	23
1	6	20.022	5	24
1	6	20.51	5	25
1	6	20.711	5	26
1	6	20.481	5	27
1	6	20.194	4	28
1	6	20.137	4	29
1	6	19.562	4	30
1	6	20.165	4	31
1	6	21.228	4	32
1	6	21.573	4	33
1	6	22.291	5	34
1	6	22.033	5	35
1	6	22.349	5	36
1	6	23.584	5	37
1	6	24.991	5	38
1	6	26.686	5	39
1	6	26.083	5	40
1	6	26.14	5	41
1	6	26.543	5	42
1	6	27.203	5	43
1	6	27.519	6	44
1	6	27.605	6	45
1	6	28.123	6	46
1	6	29.099	6	47
1	6	29.042	6	48
1	6	28.956	6	49
1	6	27.663	6	50
1	6	27.72	5	51
1	6	28.209	5	52
1	6	27.864	5	53
1	6	28.582	5	54
1	6	28.64	5	55
1	6	28.381	5	56
1	6	28.381	5	57
1	6	28.151	5	58
1	6	28.812	5	59
1	6	30.507	5	60
1	6	29.3	5	61
1	6	28.812	5	62
1	6	27.577	5	63
1	6	27.807	5	64
1	6	30.823	5	65
1	6	12.726	6	0
1	6	12.726	6	1
1	6	13.817	6	2
1	6	15.483	6	3
1	6	17.322	6	4
1	6	16.977	6	5
1	6	17.437	6	6
1	6	18.212	6	7
1	6	17.695	6	8
1	6	20.252	7	9
1	6	19.735	7	10
1	6	20.338	7	11
1	6	21.2	7	12
1	6	19.878	7	13
1	7	15.972	4	9
1	7	15.569	4	10
1	7	17.092	5	11
1	7	15.426	6	12
1	7	15.799	6	13
1	7	15.282	6	14
1	7	16.173	6	15
1	7	16.345	6	16
1	7	16.661	6	17
1	7	16.977	6	18
1	7	17.034	6	19
1	7	16.891	6	20
1	7	16.891	6	21
1	7	16.718	6	22
1	7	17.638	6	23
1	7	17.609	6	24
1	7	18.499	6	25
1	7	18.729	6	26
1	7	18.787	5	27
1	7	19.878	5	28
1	7	19.332	5	29
1	7	21.286	5	30
1	7	22.004	5	31
1	7	22.349	5	32
1	7	23.469	6	33
1	7	24.331	6	34
1	7	24.647	5	35
1	7	25.307	5	36
1	7	27.261	5	37
1	7	29.616	6	38
1	7	29.904	6	39
1	7	30.507	6	40
1	7	30.593	6	41
1	7	32.632	6	42
1	7	32.69	6	43
1	7	32.632	6	44
1	7	33.466	6	45
1	7	33.264	6	46
1	7	36.568	7	47
1	7	37.343	7	48
1	7	41.078	7	49
1	7	39.211	7	50
1	7	39.182	7	51
1	7	38.493	7	52
1	7	37.458	7	53
1	7	38.119	7	54
1	7	37.545	7	55
1	7	36.712	7	56
1	7	36.712	7	57
1	7	38.205	7	58
1	7	36.683	7	59
1	7	36.683	6	60
1	7	33.896	6	61
1	7	34.528	6	62
1	7	34.528	6	63
1	7	14.133	5	0
1	7	14.679	5	1
1	7	14.679	5	2
1	7	14.679	5	3
1	7	13.989	5	4
1	7	15.742	5	5
1	7	13.76	5	6
1	7	13.386	5	7
1	7	12.783	4	8
1	8	6.578	5	0
1	8	6.004	5	1
1	8	5.86	5	2
1	8	6.32	5	3
1	8	7.239	5	4
1	8	9.652	5	5
1	8	12.668	5	6
1	8	12.208	5	7
1	8	11.892	5	8
1	8	13.386	6	9
1	8	15.081	6	10
1	8	14.909	6	11
1	8	14.88	6	12
1	8	13.559	5	13
1	8	12.668	5	14
1	8	12.352	5	15
1	8	12.323	5	16
1	8	12.007	5	17
1	8	11.806	5	18
1	8	11.174	5	19
1	8	10.571	5	20
1	8	10.083	5	21
1	8	9.882	5	22
1	8	10.743	5	23
1	8	11.892	5	24
1	8	12.352	6	25
1	8	13.243	6	26
1	8	13.386	6	27
1	8	14.018	6	28
1	8	14.822	6	29
1	8	16.259	6	30
1	8	17.207	6	31
1	8	18.413	6	32
1	8	19.39	6	33
1	8	20.855	6	34
1	8	22.837	6	35
1	8	25.537	6	36
1	8	26.801	6	37
1	8	28.438	6	38
1	8	30.076	7	39
1	8	32.345	7	40
1	8	32.862	7	41
1	8	33.724	7	42
1	8	35.16	7	43
1	8	36.999	7	44
1	8	39.584	7	45
1	8	42.744	7	46
1	8	43.663	8	47
1	8	44.841	8	48
1	8	44.956	8	49
1	8	45.128	8	50
1	8	45.358	8	51
1	8	46.019	8	52
1	8	46.507	8	53
1	8	47.685	8	54
1	8	45.961	8	55
1	8	44.669	8	56
1	9	10.341	6	1
1	9	9.451	5	2
1	9	8.991	5	3
1	9	9.479	5	4
1	9	10.255	5	5
1	9	10.284	5	6
1	9	10.514	5	7
1	9	9.479	5	8
1	9	8.934	5	9
1	9	9.365	5	10
1	9	9.91	5	11
1	9	9.997	5	12
1	9	10.514	5	13
1	9	9.824	5	14
1	9	9.537	5	15
1	9	8.56	5	16
1	9	7.986	5	17
1	9	7.928	5	18
1	9	8.474	5	19
1	9	8.302	6	20
1	9	8.876	6	21
1	9	8.819	6	22
1	9	9.02	6	23
1	9	8.733	6	24
1	9	8.79	5	25
1	9	9.422	5	26
1	9	10.399	5	27
1	9	11.203	4	28
1	9	12.553	4	29
1	9	14.018	5	30
1	9	16.029	5	31
1	9	17.092	5	32
1	9	18.614	5	33
1	9	21.544	6	34
1	9	25.078	6	35
1	9	27.979	6	36
1	9	31.397	6	37
1	9	33.178	7	38
1	9	35.591	7	39
1	9	38.32	7	40
1	9	41.94	7	41
1	9	45.329	7	42
1	9	49.322	7	43
1	9	50.557	8	44
1	9	52.396	8	45
1	9	53.66	8	46
1	9	55.843	8	47
1	9	56.992	8	48
1	9	58.543	8	49
1	9	57.796	8	50
1	9	57.107	8	51
10	1	13.444	7	26
10	1	14.507	7	27
10	1	14.507	7	28
10	1	14.736	7	29
10	1	14.535	6	30
10	1	14.42	6	31
10	1	13.357	6	32
10	1	12.898	6	33
10	1	13.013	6	34
10	1	13.329	6	35
10	1	13.099	6	36
10	1	13.156	5	37
10	1	13.3	5	38
10	1	13.76	5	39
10	1	14.334	5	40
10	1	15.483	5	41
10	1	16.086	5	42
10	1	17.063	5	43
10	1	17.063	5	44
10	1	17.437	5	45
10	1	18.413	6	46
10	1	19.677	6	47
10	1	20.539	6	48
10	1	21.803	6	49
10	1	22.234	6	50
10	1	23.067	6	51
10	1	26.198	6	52
10	1	29.961	6	53
10	1	29.702	7	54
10	1	29.961	7	55
10	1	30.248	6	56
10	1	30.851	6	57
10	1	31.196	6	58
10	1	31.771	6	59
10	1	32.259	6	60
10	1	32.948	6	61
10	1	10.025	6	21
10	1	10.37	6	22
10	1	11.433	6	23
10	1	11.864	7	24
10	1	12.697	7	25
10	10	20.654	6	0
10	10	21.343	6	1
10	10	20.022	6	2
10	10	21.573	6	3
10	10	19.332	6	4
10	10	18.643	5	5
10	10	20.395	6	6
10	10	21.544	6	7
10	10	21.487	6	8
10	10	21.745	5	9
10	10	25.307	6	10
10	10	26.973	6	11
10	10	30.248	6	12
10	10	31.685	6	13
10	10	30.65	6	14
10	10	30.478	7	15
10	10	32.747	7	16
10	10	32.891	7	17
10	10	32.891	7	18
10	10	32.489	7	19
10	10	33.236	7	20
10	10	34.241	7	21
10	10	32.948	7	22
10	10	32.029	7	23
10	10	30.909	6	24
10	10	29.214	6	25
10	10	25.997	6	26
10	10	25.997	6	27
10	10	24.187	5	28
10	10	23.297	5	29
10	10	21.372	5	30
10	10	19.591	5	31
10	10	17.178	5	32
10	10	17.149	5	33
10	10	14.736	5	34
10	10	13.875	5	35
10	10	12.122	4	36
10	10	14.449	5	37
10	10	13.702	6	38
10	10	13.559	6	39
10	10	13.559	6	40
10	10	13.357	6	41
10	10	12.352	6	42
10	10	10.858	5	43
10	10	12.18	5	44
10	10	11.576	5	45
10	10	11.634	5	46
10	10	10.858	5	47
10	10	12.237	5	48
10	10	14.219	5	49
10	10	13.731	4	50
10	10	13.587	4	51
10	10	15.024	4	52
10	10	17.034	4	53
10	10	18.471	4	54
10	10	18.787	5	55
10	10	22.578	5	56
10	10	22.578	5	57
10	2	8.704	5	24
10	2	9.537	5	25
10	2	10.973	6	26
10	2	12.582	6	27
10	2	12.467	7	28
10	2	12.726	7	29
10	2	12.467	7	30
10	2	12.208	7	31
10	2	12.122	7	32
10	2	12.065	7	33
10	2	11.691	6	34
10	2	11.548	6	35
10	2	11.347	5	36
10	2	11.289	5	37
10	2	11.634	5	38
10	2	12.381	5	39
10	2	12.007	5	40
10	2	11.892	5	41
10	2	11.778	5	42
10	2	11.778	5	43
10	2	12.295	5	44
10	2	13.07	5	45
10	2	14.191	5	46
10	2	15.627	5	47
10	2	17.235	5	48
10	2	19.16	5	49
10	2	19.16	5	50
10	2	19.706	5	51
10	2	22.636	6	52
10	2	26.284	7	53
10	2	27.462	6	54
10	2	29.042	6	55
10	2	29.444	6	56
10	2	30.507	6	57
10	2	30.306	6	58
10	2	30.133	6	59
10	2	33.121	6	60
10	2	36.396	6	61
10	2	2.729	5	19
10	2	2.068	5	20
10	2	4.223	5	21
10	2	5.602	5	22
10	2	8.101	5	23
10	3	5.803	5	24
10	3	6.492	5	25
10	3	5.831	4	26
10	3	5.286	4	27
10	3	5.286	4	28
10	3	6.578	4	29
10	3	5.975	4	30
10	3	6.233	4	31
10	3	7.124	5	32
10	3	8.618	5	33
10	3	8.675	4	34
10	3	9.077	5	35
10	3	9.336	5	36
10	3	9.853	5	37
10	3	10.169	5	38
10	3	10.485	5	39
10	3	11.174	5	40
10	3	11.892	5	41
10	3	12.524	5	42
10	3	13.3	5	43
10	3	14.363	5	44
10	3	15.569	5	45
10	3	16.833	5	46
10	3	18.212	5	47
10	3	19.993	6	48
10	3	22.176	6	49
10	3	23.756	6	50
10	3	25.595	6	51
10	3	27.289	6	52
10	3	29.3	6	53
10	3	31.139	6	54
10	3	33.523	6	55
10	3	35.821	6	56
10	3	38.435	6	57
10	3	39.986	7	58
10	3	42.141	7	59
10	3	41.94	8	60
10	3	42.198	8	61
10	3	42.198	8	62
10	3	42.888	8	63
10	3	41.652	8	64
10	3	40.647	8	65
10	3	7.986	5	5
10	3	7.641	5	6
10	3	7.785	5	7
10	3	7.038	5	8
10	3	6.722	5	9
10	3	5.286	5	10
10	3	4.51	5	11
10	3	4.366	5	12
10	3	4.28	5	13
10	3	3.734	5	14
10	3	3.562	5	15
10	3	3.648	5	16
10	3	3.993	5	17
10	3	4.022	5	18
10	3	4.309	5	19
10	3	4.74	5	20
10	3	5.716	5	21
10	3	5.171	5	22
10	3	5.343	5	23
10	4	4.481	4	20
10	4	4.74	4	21
10	4	4.51	4	22
10	4	4.452	4	23
10	4	4.366	4	24
10	4	4.395	4	25
10	4	5.027	3	26
10	4	5.975	3	27
10	4	6.578	3	28
10	4	7.325	3	29
10	4	7.584	4	30
10	4	7.871	4	31
10	4	10.542	5	32
10	4	13.501	5	33
10	4	13.932	5	34
10	4	14.564	5	35
10	4	15.569	5	36
10	4	17.178	4	37
10	4	17.609	4	38
10	4	18.356	4	39
10	4	19.476	5	40
10	4	20.884	5	41
10	4	22.061	6	42
10	4	23.44	6	43
10	4	24.446	6	44
10	4	25.939	6	45
10	4	26.399	6	46
10	4	27.433	6	47
10	4	27.117	6	48
10	4	27.376	6	49
10	4	27.72	5	50
10	4	28.525	5	51
10	4	28.496	5	52
10	4	28.697	5	53
10	4	27.605	5	54
10	4	26.973	5	55
10	4	26.399	4	56
10	4	26.083	4	57
10	4	25.078	4	58
10	4	24.733	4	59
10	4	10.629	5	1
10	4	10.37	5	2
10	4	10.284	5	3
10	4	7.842	4	4
10	4	6.09	4	5
10	4	4.998	3	6
10	4	4.567	3	7
10	4	3.878	3	8
10	4	3.562	3	9
10	4	3.648	4	10
10	4	3.993	4	11
10	4	3.562	4	12
10	4	3.619	4	13
10	4	3.533	4	14
10	4	3.648	4	15
10	4	3.706	4	16
10	4	4.05	4	17
10	4	4.165	4	18
10	4	4.309	4	19
10	5	4.251	4	18
10	5	3.734	4	19
10	5	3.303	4	20
10	5	3.189	4	21
10	5	3.648	5	22
10	5	4.309	5	23
10	5	4.539	5	24
10	5	4.74	5	25
10	5	4.395	5	26
10	5	4.251	5	27
10	5	4.309	5	28
10	5	4.768	5	29
10	5	4.251	4	30
10	5	4.022	4	31
10	5	4.51	4	32
10	5	5.228	4	33
10	5	5.286	4	34
10	5	5.716	4	35
10	5	6.233	4	36
10	5	6.837	4	37
10	5	7.756	4	38
10	5	8.962	4	39
10	5	9.623	4	40
10	5	10.571	4	41
10	5	11.49	4	42
10	5	12.783	4	43
10	5	14.564	4	44
10	5	16.776	4	45
10	5	18.356	5	46
10	5	20.453	5	47
10	5	20.884	5	48
10	5	21.544	5	49
10	5	23.67	5	50
10	5	26.054	5	51
10	5	27.06	6	52
10	5	28.553	6	53
10	5	30.593	6	54
10	5	32.948	6	55
10	5	33.983	6	56
10	5	35.074	6	57
10	5	35.993	6	58
10	5	37.142	6	59
10	5	10.284	5	1
10	5	11.778	5	2
10	5	13.501	5	3
10	5	11.95	5	4
10	5	10.916	5	5
10	5	10.226	5	6
10	5	10.025	5	7
10	5	9.479	4	8
10	5	9.192	4	9
10	5	8.101	4	10
10	5	7.641	4	11
10	5	7.268	4	12
10	5	7.181	4	13
10	5	6.377	4	14
10	5	5.918	4	15
10	5	5.257	4	16
10	5	4.998	4	17
10	6	7.411	6	14
10	6	7.325	6	15
10	6	8.302	6	16
10	6	9.508	6	17
10	6	9.566	5	18
10	6	9.824	5	19
10	6	10.083	5	20
10	6	10.485	5	21
10	6	10.284	5	22
10	6	10.054	5	23
10	6	11.059	6	24
10	6	12.18	6	25
10	6	12.84	6	26
10	6	13.559	6	27
10	6	14.966	6	28
10	6	16.575	6	29
10	6	15.885	5	30
10	6	15.454	5	31
10	6	16.489	6	32
10	6	17.695	6	33
10	6	17.81	6	34
10	6	18.097	6	35
10	6	18.327	6	36
10	6	18.672	6	37
10	6	18.959	6	38
10	6	19.39	6	39
10	6	20.022	6	40
10	6	20.912	6	41
10	6	20.855	6	42
10	6	20.884	6	43
10	6	21.832	6	44
10	6	22.866	6	45
10	6	22.262	6	46
10	6	22.291	6	47
10	6	22.464	6	48
10	6	23.268	6	49
10	6	23.613	6	50
10	6	24.072	6	51
10	6	24.273	7	52
10	6	24.675	7	53
10	6	24.302	6	54
10	6	24.245	6	55
10	6	23.957	6	56
10	6	23.986	6	57
10	6	11.433	5	3
10	6	11.289	5	4
10	6	11.49	5	5
10	6	10.657	6	6
10	6	10.083	6	7
10	6	10.025	6	8
10	6	10.399	6	9
10	6	9.91	6	10
10	6	9.939	6	11
10	6	8.646	5	12
10	6	7.842	6	13
10	7	15.598	6	10
10	7	15.426	6	11
10	7	14.305	6	12
10	7	13.673	6	13
10	7	13.128	6	14
10	7	12.668	6	15
10	7	14.305	6	16
10	7	16.259	6	17
10	7	15.282	6	18
10	7	14.363	6	19
10	7	13.645	5	20
10	7	13.271	5	21
10	7	14.133	5	22
10	7	15.368	5	23
10	7	15.397	5	24
10	7	15.713	5	25
10	7	16.259	5	26
10	7	17.006	5	27
10	7	16.345	5	28
10	7	16.402	5	29
10	7	16.69	6	30
10	7	17.235	6	31
10	7	17.379	6	32
10	7	18.155	6	33
10	7	18.815	6	34
10	7	19.907	6	35
10	7	19.936	6	36
10	7	20.165	6	37
10	7	20.941	6	38
10	7	21.946	6	39
10	7	22.377	5	40
10	7	22.981	5	41
10	7	22.665	6	42
10	7	22.521	6	43
10	7	22.78	6	44
10	7	23.21	6	45
10	7	23.239	6	46
10	7	23.929	6	47
10	7	23.325	6	48
10	7	23.354	6	49
10	7	23.325	6	50
10	7	23.383	6	51
10	7	22.722	6	52
10	7	22.148	6	53
10	7	21.113	5	54
10	7	20.194	5	55
10	7	19.821	5	56
10	7	19.648	5	57
10	7	19.821	6	58
10	7	20.51	6	59
10	7	17.724	5	3
10	7	17.437	5	4
10	7	17.695	5	5
10	7	16.632	5	6
10	7	15.828	5	7
10	7	15.943	6	8
10	7	15.885	6	9
10	8	12.007	4	1
10	8	12.007	4	2
10	8	12.007	5	3
10	8	12.639	6	4
10	8	11.778	7	5
10	8	14.42	8	6
10	8	16.632	8	7
10	8	19.62	8	8
10	8	21.113	8	9
10	8	20.683	8	10
10	8	20.826	8	11
10	8	20.309	8	12
10	8	21.171	8	13
10	8	22.464	8	14
10	8	21.86	8	15
10	8	23.555	8	16
10	8	23.9	8	17
10	8	24.647	8	18
10	8	24.101	8	19
10	8	25.336	8	20
10	8	24.819	8	21
10	8	26.485	8	22
10	8	26.571	7	23
10	8	27.146	6	24
10	8	27.088	6	25
10	8	27.548	6	26
10	8	27.232	6	27
10	8	25.767	6	28
10	8	26.571	6	29
10	8	25.681	6	30
10	8	25.796	6	31
10	8	25.652	6	32
10	8	25.968	6	33
10	8	24.762	6	34
10	8	25.02	5	35
10	8	25.394	5	36
10	8	24.733	5	37
10	8	23.641	5	38
10	8	21.975	5	39
10	8	21.027	5	40
10	8	19.964	5	41
10	8	19.534	5	42
10	8	19.562	5	43
10	8	17.695	5	44
10	8	17.293	5	45
10	8	17.437	5	46
10	8	18.787	5	47
10	8	19.218	5	48
10	8	16.431	5	49
10	8	15.742	5	50
10	8	17.322	5	51
10	8	17.121	6	52
10	8	15.426	6	53
10	8	16.201	6	54
10	8	14.047	6	55
10	8	14.277	5	56
10	8	16.776	6	57
10	8	16.402	6	58
10	8	16.862	6	59
10	9	10.686	6	2
10	9	10.485	6	3
10	9	10.686	6	4
10	9	10.456	6	5
10	9	11.864	6	6
10	9	13.156	6	7
10	9	12.208	6	8
10	9	11.864	6	9
10	9	12.467	7	10
10	9	13.961	7	11
10	9	13.989	7	12
10	9	15.483	7	13
10	9	16.201	7	14
10	9	16.977	7	15
10	9	19.189	7	16
10	9	22.176	7	17
10	9	23.067	7	18
10	9	24.13	7	19
10	9	23.067	7	20
10	9	25.279	7	21
10	9	25.508	6	22
10	9	25.221	6	23
10	9	27.864	6	24
10	9	29.042	6	25
10	9	30.507	6	26
10	9	30.105	7	27
10	9	31.024	7	28
10	9	30.737	7	29
10	9	29.645	7	30
10	9	29.243	7	31
10	9	28.582	6	32
10	9	28.266	6	33
10	9	28.324	6	34
10	9	27.692	6	35
10	9	25.882	6	36
10	9	25.595	6	37
10	9	24.704	6	38
10	9	23.584	6	39
10	9	20.884	5	40
10	9	20.596	5	41
10	9	19.62	5	42
10	9	17.724	5	43
10	9	16	5	44
10	9	15.885	5	45
10	9	16	5	46
10	9	15.138	5	47
10	9	15.569	4	48
10	9	14.736	4	49
10	9	16.029	4	50
10	9	15.454	4	51
10	9	16.718	4	52
10	9	18.04	4	53
10	9	21.774	5	54
10	9	23.957	5	55
10	9	27.031	5	56
10	9	26.945	5	57
10	9	29.157	5	58
11	1	7.009	4	26
11	1	7.095	5	27
11	1	7.268	5	28
11	1	7.928	5	29
11	1	8.618	5	30
11	1	9.508	5	31
11	1	10.399	5	32
11	1	11.663	5	33
11	1	12.18	6	34
11	1	13.501	6	35
11	1	15.024	6	36
11	1	16.919	6	37
11	1	18.011	6	38
11	1	19.562	6	39
11	1	19.62	7	40
11	1	20.051	7	41
11	1	21.429	6	42
11	1	22.722	6	43
11	1	23.067	6	44
11	1	23.929	6	45
11	1	23.44	6	46
11	1	23.526	6	47
11	1	24.273	6	48
11	1	25.078	6	49
11	1	24.905	6	50
11	1	24.79	6	51
11	1	24.589	6	52
11	1	24.446	6	53
11	1	24.388	6	54
11	1	24.302	6	55
11	1	22.78	6	56
11	1	21.286	6	57
11	1	21.2	6	58
11	1	21.315	6	59
11	1	20.912	5	60
11	1	20.654	5	61
11	1	19.706	5	62
11	1	19.131	5	63
11	1	18.557	5	64
11	1	18.384	5	65
11	1	19.332	6	66
11	1	20.223	6	67
11	1	16.69	6	68
11	1	13.587	6	69
11	1	4.022	3	19
11	1	3.39	4	20
11	1	3.418	4	21
11	1	3.016	4	22
11	1	3.102	4	23
11	1	4.682	4	24
11	1	7.383	4	25
11	10	3.074	3	5
11	10	2.643	3	6
11	10	3.39	3	7
11	10	3.016	3	8
11	10	3.016	3	9
11	10	2.873	3	10
11	10	3.275	3	11
11	10	2.873	3	12
11	10	2.585	3	13
11	10	2.212	3	14
11	10	2.011	3	15
11	10	1.896	3	16
11	10	2.04	3	17
11	10	3.246	4	18
11	10	5.228	4	19
11	10	5.515	4	20
11	10	5.946	4	21
11	10	6.205	4	22
11	10	6.779	4	23
11	10	7.181	4	24
11	10	7.986	4	25
11	10	8.244	4	26
11	10	8.819	4	27
11	10	9.767	5	28
11	10	11.663	5	29
11	10	12.869	5	30
11	10	14.679	5	31
11	10	15.311	5	32
11	10	16.718	5	33
11	10	17.867	6	34
11	10	20.367	6	35
11	10	21.717	6	36
11	10	23.44	6	37
11	10	25.796	6	38
11	10	28.754	6	39
11	10	31.11	6	40
11	10	34.04	6	41
11	10	36.166	6	42
11	10	39.354	6	43
11	10	39.354	6	44
11	10	40.072	6	45
11	10	38.952	6	46
11	10	38.521	6	47
11	10	37.545	6	48
11	10	37.573	6	49
11	10	37.861	6	50
11	10	38.263	6	51
11	10	35.792	6	52
11	10	33.896	6	53
11	10	32.632	6	54
11	10	32	6	55
11	2	11.26	4	22
11	2	13.702	4	23
11	2	13.702	4	24
11	2	13.846	4	25
11	2	17.638	5	26
11	2	22.607	5	27
11	2	22.722	5	28
11	2	23.354	5	29
11	2	22.722	5	30
11	2	22.837	5	31
11	2	22.78	5	32
11	2	23.842	5	33
11	2	23.498	5	34
11	2	23.814	5	35
11	2	23.21	5	36
11	2	23.153	5	37
11	2	23.297	5	38
11	2	23.21	5	39
11	2	22.435	6	40
11	2	21.745	6	41
11	2	20.395	6	42
11	2	19.447	6	43
11	2	18.384	6	44
11	2	17.609	6	45
11	2	16.345	6	46
11	2	15.138	6	47
11	2	13.702	5	48
11	2	12.553	5	49
11	2	10.858	4	50
11	2	9.508	4	51
11	2	8.876	4	52
11	2	8.56	4	53
11	2	8.848	5	54
11	2	9.623	5	55
11	2	10.169	5	56
11	2	11.232	5	57
11	2	10.715	5	58
11	2	10.772	5	59
11	2	10.571	5	60
11	2	10.629	5	61
11	2	1.494	3	11
11	2	0.776	3	12
11	2	0.632	3	13
11	2	0.747	3	14
11	2	1.178	3	15
11	2	2.356	3	16
11	2	4.137	3	17
11	2	3.562	4	18
11	2	3.476	4	19
11	2	5.803	4	20
11	2	9.537	4	21
11	3	12.41	6	20
11	3	12.41	6	21
11	3	12.582	6	22
11	3	12.927	6	23
11	3	12.984	5	24
11	3	13.271	5	25
11	3	13.156	5	26
11	3	13.329	5	27
11	3	13.444	6	28
11	3	13.932	6	29
11	3	13.788	6	30
11	3	14.133	6	31
11	3	13.875	5	32
11	3	13.989	5	33
11	3	14.478	5	34
11	3	15.196	5	35
11	3	15.454	5	36
11	3	15.799	5	37
11	3	15.397	5	38
11	3	15.167	5	39
11	3	14.909	5	40
11	3	15.253	5	41
11	3	15.368	5	42
11	3	15.656	5	43
11	3	15.483	5	44
11	3	15.397	5	45
11	3	16.259	6	46
11	3	17.207	6	47
11	3	16.862	6	48
11	3	16.69	6	49
11	3	16.948	6	50
11	3	17.35	6	51
11	3	17.207	6	52
11	3	17.753	6	53
11	3	17.638	6	54
11	3	18.04	6	55
11	3	18.384	6	56
11	3	19.131	6	57
11	3	19.131	7	58
11	3	19.591	7	59
11	3	18.873	6	60
11	3	18.758	6	61
11	3	4.309	5	5
11	3	5.199	5	6
11	3	6.722	5	7
11	3	7.9	5	8
11	3	10.284	5	9
11	3	10.37	5	10
11	3	10.945	5	11
11	3	10.571	5	12
11	3	10.6	5	13
11	3	10.686	5	14
11	3	11.49	5	15
11	3	12.094	6	16
11	3	12.754	6	17
11	3	12.668	6	18
11	3	12.84	6	19
11	4	19.505	5	18
11	4	19.476	5	19
11	4	20.424	5	20
11	4	21.487	5	21
11	4	21.717	5	22
11	4	22.32	5	23
11	4	21.228	5	24
11	4	20.424	5	25
11	4	21.487	5	26
11	4	23.153	5	27
11	4	21.688	5	28
11	4	21.056	5	29
11	4	19.103	5	30
11	4	18.27	5	31
11	4	17.264	5	32
11	4	17.264	5	33
11	4	16.805	6	34
11	4	17.235	6	35
11	4	16.747	6	36
11	4	16.259	6	37
11	4	15.024	5	38
11	4	14.104	5	39
11	4	13.53	5	40
11	4	12.955	5	41
11	4	12.438	5	42
11	4	12.18	5	43
11	4	11.95	5	44
11	4	11.806	5	45
11	4	11.576	5	46
11	4	11.634	5	47
11	4	11.088	5	48
11	4	10.887	5	49
11	4	11.059	5	50
11	4	11.892	5	51
11	4	11.404	5	52
11	4	11.289	5	53
11	4	11.088	5	54
11	4	10.887	5	55
11	4	11.49	5	56
11	4	12.151	5	57
11	4	12.094	5	58
11	4	11.921	5	59
11	4	11.806	5	60
11	4	12.496	5	61
11	4	11.634	5	62
11	4	11.375	5	63
11	4	17.006	6	7
11	4	16.805	6	8
11	4	17.58	6	9
11	4	17.379	7	10
11	4	17.839	7	11
11	4	17.982	7	12
11	4	18.528	7	13
11	4	18.557	7	14
11	4	18.93	7	15
11	4	19.189	6	16
11	4	19.648	6	17
11	5	14.334	6	14
11	5	14.708	6	15
11	5	14.162	6	16
11	5	14.047	6	17
11	5	15.742	6	18
11	5	17.724	6	19
11	5	16.489	6	20
11	5	15.253	6	21
11	5	15.742	6	22
11	5	16.345	6	23
11	5	16.316	5	24
11	5	16.69	5	25
11	5	17.781	5	26
11	5	19.131	5	27
11	5	18.729	5	28
11	5	18.614	5	29
11	5	19.562	6	30
11	5	21.027	6	31
11	5	21.745	7	32
11	5	22.837	7	33
11	5	22.464	7	34
11	5	22.837	7	35
11	5	21.516	7	36
11	5	20.596	7	37
11	5	19.505	6	38
11	5	18.844	6	39
11	5	18.27	6	40
11	5	17.896	6	41
11	5	18.011	7	42
11	5	18.729	7	43
11	5	18.959	7	44
11	5	19.562	7	45
11	5	19.936	6	46
11	5	20.826	6	47
11	5	19.534	6	48
11	5	18.643	6	49
11	5	18.097	6	50
11	5	17.781	6	51
11	5	16.345	5	52
11	5	15.081	5	53
11	5	14.65	5	54
11	5	14.42	5	55
11	5	14.305	5	56
11	5	14.535	5	57
11	5	13.903	5	58
11	5	13.472	5	59
11	5	13.329	5	60
11	5	14.219	5	61
11	5	7.584	5	7
11	5	8.532	6	8
11	5	10.427	6	9
11	5	13.185	6	10
11	5	16.546	6	11
11	5	15.253	6	12
11	5	14.219	6	13
11	6	4.682	5	12
11	6	5.056	5	13
11	6	5.86	5	14
11	6	7.21	5	15
11	6	7.526	5	16
11	6	8.043	5	17
11	6	7.555	5	18
11	6	7.296	5	19
11	6	7.153	5	20
11	6	7.067	5	21
11	6	6.923	5	22
11	6	6.894	5	23
11	6	6.894	4	24
11	6	6.894	4	25
11	6	7.181	4	26
11	6	7.67	4	27
11	6	8.56	5	28
11	6	9.566	5	29
11	6	10.456	5	30
11	6	11.576	5	31
11	6	13.3	6	32
11	6	15.914	6	33
11	6	17.839	7	34
11	6	20.453	7	35
11	6	20.596	7	36
11	6	20.912	7	37
11	6	22.377	6	38
11	6	24.043	6	39
11	6	23.555	6	40
11	6	23.325	6	41
11	6	24.216	6	42
11	6	25.48	6	43
11	6	25.796	6	44
11	6	26.169	6	45
11	6	27.634	6	46
11	6	29.501	6	47
11	6	29.3	6	48
11	6	29.53	6	49
11	6	29.559	6	50
11	6	29.817	6	51
11	6	30.593	6	52
11	6	32.115	6	53
11	6	32.316	6	54
11	6	33.379	6	55
11	6	33.092	6	56
11	6	33.609	6	57
11	6	32.776	6	58
11	6	32.288	6	59
11	6	2.671	4	7
11	6	2.815	4	8
11	6	3.246	4	9
11	6	3.677	4	10
11	6	4.338	4	11
11	7	2.097	4	8
11	7	3.275	4	9
11	7	3.619	5	10
11	7	4.137	5	11
11	7	4.797	5	12
11	7	5.774	5	13
11	7	7.095	6	14
11	7	8.646	6	15
11	7	7.842	6	16
11	7	7.354	6	17
11	7	8.014	6	18
11	7	8.819	6	19
11	7	8.761	6	20
11	7	8.646	6	21
11	7	9.422	6	22
11	7	10.169	6	23
11	7	9.738	5	24
11	7	9.451	5	25
11	7	9.106	5	26
11	7	8.905	5	27
11	7	8.962	5	28
11	7	9.451	5	29
11	7	9.566	5	30
11	7	9.882	5	31
11	7	10.657	5	32
11	7	11.72	5	33
11	7	12.467	5	34
11	7	13.53	5	35
11	7	14.076	5	36
11	7	14.679	5	37
11	7	15.742	6	38
11	7	17.494	6	39
11	7	17.896	6	40
11	7	18.557	6	41
11	7	20.367	7	42
11	7	22.377	7	43
11	7	24.359	7	44
11	7	27.031	7	45
11	7	26.83	7	46
11	7	27.002	7	47
11	7	28.266	7	48
11	7	30.995	7	49
11	7	33.954	7	50
11	7	38.062	7	51
11	7	37.085	8	52
11	7	37.286	8	53
11	7	39.096	8	54
11	7	41.308	8	55
11	7	41.882	8	56
11	7	42.37	8	57
11	7	41.681	8	58
11	7	41.193	8	59
11	7	38.521	8	60
11	7	36.597	8	61
11	7	1.695	3	5
11	7	1.494	4	6
11	7	1.408	4	7
11	8	4.079	4	5
11	8	4.682	4	6
11	8	6.09	4	7
11	8	6.463	5	8
11	8	7.181	5	9
11	8	8.043	6	10
11	8	9.393	6	11
11	8	9.307	5	12
11	8	9.336	5	13
11	8	8.302	5	14
11	8	7.526	5	15
11	8	8.043	5	16
11	8	8.962	5	17
11	8	9.451	5	18
11	8	10.313	5	19
11	8	10.715	5	20
11	8	11.146	5	21
11	8	12.582	5	22
11	8	14.305	5	23
11	8	16.517	6	24
11	8	19.103	6	25
11	8	20.568	6	26
11	8	22.234	6	27
11	8	24.216	7	28
11	8	26.629	7	29
11	8	27.692	7	30
11	8	29.07	7	31
11	8	28.984	7	32
11	8	28.812	7	33
11	8	28.898	6	34
11	8	29.444	6	35
11	8	27.921	5	36
11	8	26.887	5	37
11	8	25.221	5	38
11	8	23.613	5	39
11	8	23.21	5	40
11	8	23.239	5	41
11	8	20.654	4	42
11	8	18.729	4	43
11	8	18.155	4	44
11	8	18.298	4	45
11	8	13.673	4	46
11	8	10.772	4	47
11	8	11.95	4	48
11	8	13.357	4	49
11	8	13.013	4	50
11	8	13.3	4	51
11	8	13.329	4	52
11	8	13.386	4	53
11	8	12.869	4	54
11	8	12.41	4	55
11	8	11.979	4	56
11	8	11.892	4	57
11	9	6.09	4	3
11	9	6.808	5	4
11	9	7.986	5	5
11	9	7.555	5	6
11	9	7.411	5	7
11	9	7.497	5	8
11	9	8.014	5	9
11	9	7.411	5	10
11	9	7.239	5	11
11	9	6.751	4	12
11	9	6.722	4	13
11	9	6.119	4	14
11	9	5.774	4	15
11	9	5.429	4	16
11	9	5.372	4	17
11	9	4.74	4	18
11	9	4.452	4	19
11	9	4.826	4	20
11	9	5.429	4	21
11	9	5.659	4	22
11	9	6.032	4	23
11	9	7.756	6	24
11	9	10.111	6	25
11	9	10.743	6	26
11	9	11.605	6	27
11	9	12.381	6	28
11	9	13.673	6	29
11	9	15.081	6	30
11	9	16.919	6	31
11	9	14.191	5	32
11	9	13.961	5	33
11	9	14.133	5	34
11	9	14.621	5	35
11	9	15.598	5	36
11	9	17.034	5	37
11	9	19.275	5	38
11	9	22.234	5	39
11	9	24.417	6	40
11	9	28.553	6	41
11	9	28.64	6	42
11	9	28.726	6	43
11	9	31.455	7	44
11	9	35.103	7	45
11	9	36.309	7	46
11	9	38.062	7	47
11	9	37.861	7	48
11	9	38.234	7	49
11	9	35.591	7	50
11	9	34.097	7	51
11	9	35.735	7	52
11	9	37.171	7	53
12	1	1.551	3	30
12	1	2.298	3	31
12	1	2.844	3	32
12	1	3.821	3	33
12	1	3.907	3	34
12	1	4.165	3	35
12	1	4.883	3	36
12	1	5.889	3	37
12	1	6.779	4	38
12	1	8.101	4	39
12	1	8.33	4	40
12	1	8.618	4	41
12	1	10.83	5	42
12	1	14.822	5	43
12	1	16.115	6	44
12	1	17.954	6	45
12	1	19.677	6	46
12	1	21.889	6	47
12	1	22.349	6	48
12	1	24.216	6	49
12	1	24.417	5	50
12	1	25.336	5	51
12	1	26.054	5	52
12	1	26.945	5	53
12	1	26.83	5	54
12	1	27.893	5	55
12	1	27.261	5	56
12	1	26.715	5	57
12	1	25.911	5	58
12	1	25.02	5	59
12	1	25.106	5	60
12	1	25.02	5	61
12	1	25.02	5	62
12	1	24.819	5	63
12	1	24.934	5	64
12	1	25.623	5	65
12	1	25.422	5	66
12	1	25.25	5	67
12	1	25.336	4	68
12	1	25.537	4	69
12	1	27.605	4	70
12	1	30.277	4	71
12	1	29.932	4	72
12	1	29.588	4	73
12	1	0.747	4	13
12	1	0.977	4	14
12	1	1.494	4	15
12	1	2.154	5	16
12	1	3.246	5	17
12	1	3.964	5	18
12	1	4.855	5	19
12	1	4.251	5	20
12	1	4.079	5	21
12	1	4.137	5	22
12	1	4.596	5	23
12	1	3.418	4	24
12	1	2.671	4	25
12	1	2.097	3	26
12	1	1.695	3	27
12	1	1.321	3	28
12	1	1.12	3	29
12	10	3.907	5	11
12	10	4.711	5	12
12	10	5.918	5	13
12	10	5.372	5	14
12	10	5.314	5	15
12	10	5.343	4	16
12	10	5.716	4	17
12	10	6.176	4	18
12	10	6.779	4	19
12	10	6.176	4	20
12	10	5.688	4	21
12	10	5.975	4	22
12	10	6.32	4	23
12	10	6.578	4	24
12	10	6.98	4	25
12	10	6.98	4	26
12	10	7.095	4	27
12	10	8.704	5	28
12	10	10.801	5	29
12	10	10.686	5	30
12	10	11.26	5	31
12	10	10.858	4	32
12	10	11.174	4	33
12	10	12.639	5	34
12	10	14.305	5	35
12	10	15.052	5	36
12	10	16	5	37
12	10	16.173	5	38
12	10	17.006	5	39
12	10	17.437	5	40
12	10	18.614	5	41
12	10	20.912	5	42
12	10	23.325	5	43
12	10	23.641	5	44
12	10	24.359	5	45
12	10	23.727	6	46
12	10	23.9	6	47
12	10	23.727	6	48
12	10	24.245	6	49
12	10	23.842	6	50
12	10	23.699	6	51
12	10	24.302	6	52
12	10	24.905	6	53
12	10	25.623	5	54
12	10	26.715	5	55
12	10	24.848	5	56
12	10	23.067	5	57
12	2	10.255	5	27
12	2	11.462	5	28
12	2	12.898	5	29
12	2	14.305	5	30
12	2	16.029	5	31
12	2	16.862	6	32
12	2	18.471	6	33
12	2	19.447	6	34
12	2	20.769	6	35
12	2	21.889	7	36
12	2	23.526	7	37
12	2	23.986	7	38
12	2	24.877	7	39
12	2	27.577	7	40
12	2	30.823	7	41
12	2	30.047	7	42
12	2	29.76	7	43
12	2	29.329	7	44
12	2	29.272	7	45
12	2	30.047	7	46
12	2	31.081	7	47
12	2	31.397	7	48
12	2	31.886	7	49
12	2	30.909	7	50
12	2	30.219	7	51
12	2	28.869	6	52
12	2	27.548	6	53
12	2	28.18	6	54
12	2	28.64	6	55
12	2	28.381	5	56
12	2	28.295	5	57
12	2	28.525	6	58
12	2	29.243	6	59
12	2	29.099	6	60
12	2	29.185	6	61
12	2	28.209	6	62
12	2	27.634	6	63
12	2	27.519	6	64
12	2	27.921	6	65
12	3	33.58	6	26
12	3	34.672	6	27
12	3	32.029	7	28
12	3	30.133	7	29
12	3	28.783	7	30
12	3	28.295	7	31
12	3	25.911	6	32
12	3	24.302	6	33
12	3	25.652	5	34
12	3	28.209	5	35
12	3	27.95	6	36
12	3	28.237	6	37
12	3	26.945	6	38
12	3	26.543	6	39
12	3	25.738	6	40
12	3	25.221	6	41
12	3	25.049	6	42
12	3	25.365	6	43
12	3	26.399	7	44
12	3	28.18	7	45
12	3	29.358	7	46
12	3	31.196	7	47
12	3	30.938	7	48
12	3	31.627	7	49
12	3	31.311	7	50
12	3	31.57	7	51
12	3	30.88	7	52
12	3	30.851	7	53
12	3	31.369	7	54
12	3	32.776	7	55
12	3	32.259	7	56
12	3	32.805	7	57
12	3	32.345	7	58
12	3	32.173	7	59
12	3	32.288	7	60
12	3	32.805	7	61
12	3	31.282	7	62
12	3	30.219	7	63
12	3	29.616	7	64
12	3	29.932	7	65
12	3	27.404	7	66
12	3	25.451	7	67
12	3	26.916	7	68
12	3	29.099	7	69
12	3	12.639	4	5
12	3	12.524	4	6
12	3	12.898	4	7
12	3	15.253	4	8
12	3	18.384	4	9
12	3	15.196	4	10
12	3	13.07	4	11
12	3	14.65	4	12
12	3	17.264	4	13
12	3	18.959	5	14
12	3	20.999	5	15
12	3	23.957	5	16
12	3	27.663	5	17
12	3	26.973	6	18
12	3	26.284	6	19
12	3	27.289	6	20
12	3	28.467	6	21
12	3	29.875	7	22
12	3	31.713	7	23
12	3	31.828	6	24
12	3	32.92	6	25
12	4	1.953	4	25
12	4	2.011	4	26
12	4	2.241	4	27
12	4	4.022	5	28
12	4	6.119	5	29
12	4	6.808	5	30
12	4	7.584	5	31
12	4	9.537	5	32
12	4	12.007	5	33
12	4	13.587	5	34
12	4	15.627	5	35
12	4	16.891	6	36
12	4	18.413	6	37
12	4	18.844	6	38
12	4	19.562	6	39
12	4	23.009	7	40
12	4	27.088	7	41
12	4	27.146	7	42
12	4	27.577	7	43
12	4	26.198	6	44
12	4	25.164	6	45
12	4	25.135	6	46
12	4	25.307	6	47
12	4	25.566	6	48
12	4	26.284	6	49
12	4	25.422	6	50
12	4	25.049	6	51
12	4	24.819	6	52
12	4	24.79	6	53
12	4	24.043	6	54
12	4	23.239	6	55
12	4	21.774	6	56
12	4	20.855	6	57
12	4	20.826	6	58
12	4	21.085	6	59
12	4	20.826	6	60
12	4	20.884	6	61
12	4	20.424	6	62
12	4	20.194	6	63
12	4	20.28	6	64
12	4	20.912	6	65
12	5	6.722	6	16
12	5	7.44	6	17
12	5	7.842	6	18
12	5	8.589	6	19
12	5	8.819	6	20
12	5	9.566	6	21
12	5	9.135	6	22
12	5	9.422	6	23
12	5	9.336	6	24
12	5	9.365	6	25
12	5	8.79	6	26
12	5	8.503	6	27
12	5	8.532	5	28
12	5	8.962	5	29
12	5	9.681	5	30
12	5	10.111	5	31
12	5	10.14	5	32
12	5	10.313	5	33
12	5	9.882	5	34
12	5	9.795	5	35
12	5	10.801	5	36
12	5	12.266	5	37
12	5	12.639	5	38
12	5	13.961	5	39
12	5	14.219	4	40
12	5	15.34	4	41
12	5	15.196	4	42
12	5	15.799	4	43
12	5	15.052	4	44
12	5	14.851	4	45
12	5	16.288	4	46
12	5	18.298	4	47
12	5	18.93	5	48
12	5	19.821	5	49
12	5	20.97	5	50
12	5	22.32	5	51
12	5	22.722	5	52
12	5	23.239	5	53
12	5	23.871	5	54
12	5	24.762	5	55
12	5	25.738	6	56
12	5	27.175	6	57
12	5	28.668	6	58
12	5	30.392	6	59
12	5	29.616	6	60
12	5	28.525	6	61
12	5	27.088	6	62
12	5	26.169	6	63
12	5	4.395	4	11
12	5	4.768	6	12
12	5	5.458	6	13
12	5	5.774	6	14
12	5	6.377	6	15
12	6	5.142	5	12
12	6	5.659	5	13
12	6	5.458	5	14
12	6	5.429	5	15
12	6	5.688	6	16
12	6	6.09	6	17
12	6	6.061	6	18
12	6	6.578	6	19
12	6	6.952	6	20
12	6	7.785	6	21
12	6	7.641	6	22
12	6	7.928	6	23
12	6	8.761	6	24
12	6	9.939	6	25
[truncated: 6,065 more rows]
