# Supplementary material for: 3D cell neighbour dynamics in growing pseudostratified epithelia
Source: eLife. 2021 Oct 5;10:e68135. doi: 10.7554/eLife.68135 (PMC8570695; doi:10.7554/eLife.68135)
Supplement: Figure 7—source data 2. [file elife-68135-fig7-data2.xls]

## Sheet: hexFreqCV
layer	timepoint	neighbors	hexpercent	CV
11	1	6	0.166667	0.748589
11	10	6	0.428571	0.609104
11	2	6	0.333333	0.435757
11	3	6	0.25	0.483706
11	4	6	0.0909091	0.801856
11	5	6	0.307692	0.672155
11	6	6	0.357143	0.633242
11	7	6	0.384615	0.64341
11	8	6	0.214286	0.673314
11	9	6	0.0666667	1.01657
12	1	6	0.166667	0.775881
12	10	6	0.428571	0.646971
12	2	6	0.3	0.676547
12	3	6	0.230769	0.440986
12	4	6	0.181818	0.781986
12	5	6	0.307692	0.687924
12	6	6	0.357143	0.661871
12	7	6	0.461538	0.627541
12	8	6	0.142857	0.66136
12	9	6	0.0666667	1.01454
13	1	6	0.2	0.753234
13	10	6	0.428571	0.649272
13	2	6	0.3	0.746025
13	3	6	0.230769	0.500165
13	4	6	0.272727	0.793745
13	5	6	0.266667	0.704276
13	6	6	0.5	0.659573
13	7	6	0.466667	0.618295
13	8	6	0.0666667	0.656428
13	9	6	0.0666667	1.12387
14	1	6	0.2	0.919243
14	10	6	0.285714	0.62655
14	2	6	0.3	0.77629
14	3	6	0.307692	0.5239
14	4	6	0.181818	0.812219
14	5	6	0.333333	0.784294
14	6	6	0.428571	0.631277
14	7	6	0.6	0.677477
14	8	6	0.2	0.713871
14	9	6	0.2	1.14267
15	1	6	0.2	0.888903
15	10	6	0.214286	0.642279
15	2	6	0.272727	0.793534
15	3	6	0.285714	0.563219
15	4	6	0.166667	0.799482
15	5	6	0.333333	0.773271
15	6	6	0.428571	0.612258
15	7	6	0.6	0.646723
15	8	6	0.2	0.704901
15	9	6	0.2	1.12801
16	1	6	0.3	0.889069
16	10	6	0.285714	0.643145
16	2	6	0.181818	0.839022
16	3	6	0.285714	0.653284
16	4	6	0.25	0.803397
16	5	6	0.266667	0.787939
16	6	6	0.5	0.577909
16	7	6	0.466667	0.611645
16	8	6	0.266667	0.685867
16	9	6	0.266667	1.15392
17	1	6	0.363636	0.846724
17	10	6	0.285714	0.631148
17	2	6	0.166667	0.796733
17	3	6	0.285714	0.677623
17	4	6	0.25	0.779823
17	5	6	0.266667	0.780719
17	6	6	0.466667	0.563807
17	7	6	0.6	0.58514
17	8	6	0.266667	0.655408
17	9	6	0.266667	1.15476
18	1	6	0.363636	0.872401
18	10	6	0.285714	0.602605
18	2	6	0.333333	0.846372
18	3	6	0.285714	0.715222
18	4	6	0.333333	0.775127
18	5	6	0.266667	0.776371
18	6	6	0.533333	0.602061
18	7	6	0.6	0.561762
18	8	6	0.266667	0.632676
18	9	6	0.266667	1.13102
19	1	6	0.333333	0.880029
19	10	6	0.357143	0.581915
19	2	6	0.307692	0.885088
19	3	6	0.285714	0.737474
19	4	6	0.384615	0.783524
19	5	6	0.266667	0.787117
19	6	6	0.533333	0.589826
19	7	6	0.666667	0.527432
19	8	6	0.266667	0.610314
19	9	6	0.266667	1.16167
20	1	6	0.333333	0.870229
20	10	6	0.357143	0.54741
20	2	6	0.230769	0.925839
20	3	6	0.285714	0.749187
20	4	6	0.384615	0.842067
20	5	6	0.333333	0.790099
20	6	6	0.333333	0.586592
20	7	6	0.4	0.492312
20	8	6	0.266667	0.586554
20	9	6	0.333333	1.09578
21	1	6	0.384615	0.854853
21	10	6	0.357143	0.53964
21	2	6	0.230769	0.843144
21	3	6	0.266667	0.757418
21	4	6	0.384615	0.799274
21	5	6	0.333333	0.777661
21	6	6	0.333333	0.580682
21	7	6	0.4	0.506216
21	8	6	0.266667	0.575822
21	9	6	0.333333	1.03444
22	1	6	0.384615	0.806385
22	10	6	0.357143	0.5305
22	2	6	0.230769	0.776458
22	3	6	0.266667	0.808323
22	4	6	0.461538	0.742916
22	5	6	0.333333	0.755683
22	6	6	0.4	0.570187
22	7	6	0.333333	0.525745
22	8	6	0.133333	0.560381
22	9	6	0.533333	0.888519
23	1	6	0.384615	0.786721
23	10	6	0.333333	0.500237
23	2	6	0.142857	0.772671
23	3	6	0.266667	0.800358
23	4	6	0.461538	0.711907
23	5	6	0.333333	0.754742
23	6	6	0.333333	0.559706
23	7	6	0.333333	0.546357
23	8	6	0.133333	0.545909
23	9	6	0.466667	0.752801
24	1	6	0.307692	0.750795
24	10	6	0.466667	0.553617
24	2	6	0.428571	0.73649
24	3	6	0.266667	0.78883
24	4	6	0.153846	0.653712
24	5	6	0.4	0.750303
24	6	6	0.333333	0.553492
24	7	6	0.266667	0.618226
24	8	6	0.333333	0.524913
24	9	6	0.4	0.586532
25	1	6	0.307692	0.71551
25	10	6	0.4	0.539072
25	2	6	0.5	0.682321
25	3	6	0.266667	0.751242
25	4	6	0.2	0.616369
25	5	6	0.4	0.721891
25	6	6	0.4	0.517455
25	7	6	0.266667	0.609294
25	8	6	0.4	0.494584
25	9	6	0.4	0.54218
26	1	6	0.461538	0.650924
26	10	6	0.4	0.518195
26	2	6	0.428571	0.62235
26	3	6	0.266667	0.727734
26	4	6	0.2	0.622921
26	5	6	0.333333	0.695306
26	6	6	0.4	0.499989
26	7	6	0.2	0.5958
26	8	6	0.533333	0.472769
26	9	6	0.4	0.462124
27	1	6	0.4	0.631229
27	10	6	0.4	0.530751
27	2	6	0.4	0.584766
27	3	6	0.333333	0.699989
27	4	6	0.266667	0.572419
27	5	6	0.4	0.669763
27	6	6	0.4	0.490396
27	7	6	0.133333	0.587075
27	8	6	0.466667	0.439945
27	9	6	0.285714	0.432142
28	1	6	0.266667	0.714961
28	10	6	0.357143	0.538072
28	2	6	0.133333	0.550905
28	3	6	0.266667	0.668576
28	4	6	0.4	0.522936
28	5	6	0.4	0.637602
28	6	6	0.466667	0.48305
28	7	6	0.2	0.577012
28	8	6	0.466667	0.417252
28	9	6	0.285714	0.412693
29	1	6	0.266667	0.698904
29	10	6	0.357143	0.454035
29	2	6	0.133333	0.490167
29	3	6	0.266667	0.630074
29	4	6	0.4	0.460325
29	5	6	0.4	0.588854
29	6	6	0.533333	0.459233
29	7	6	0.2	0.56395
29	8	6	0.466667	0.418109
29	9	6	0.285714	0.396056
30	1	6	0.2	0.663691
30	10	6	0.285714	0.414941
30	2	6	0.2	0.443429
30	3	6	0.266667	0.568283
30	4	6	0.4	0.408823
30	5	6	0.533333	0.548815
30	6	6	0.266667	0.442914
30	7	6	0.2	0.547848
30	8	6	0.4	0.417377
30	9	6	0.285714	0.368806
31	1	6	0.2	0.617659
31	10	6	0.285714	0.390044
31	2	6	0.133333	0.420027
31	3	6	0.266667	0.532158
31	4	6	0.4	0.401801
31	5	6	0.6	0.510116
31	6	6	0.266667	0.419433
31	7	6	0.2	0.522975
31	8	6	0.4	0.406803
31	9	6	0.285714	0.321407
32	1	6	0.266667	0.592704
32	10	6	0.428571	0.36251
32	2	6	0.133333	0.405229
32	3	6	0.333333	0.491713
32	4	6	0.466667	0.396543
32	5	6	0.4	0.480108
32	6	6	0.266667	0.396683
32	7	6	0.266667	0.49513
32	8	6	0.4	0.392121
32	9	6	0.285714	0.292547
33	1	6	0.266667	0.538995
33	10	6	0.5	0.355464
33	2	6	0.133333	0.368936
33	3	6	0.333333	0.434959
33	4	6	0.466667	0.357548
33	5	6	0.4	0.468067
33	6	6	0.266667	0.376506
33	7	6	0.333333	0.463475
33	8	6	0.4	0.399984
33	9	6	0.285714	0.2884
34	1	6	0.266667	0.491222
34	10	6	0.357143	0.356794
34	2	6	0.266667	0.332473
34	3	6	0.2	0.346147
34	4	6	0.4	0.327544
34	5	6	0.2	0.453636
34	6	6	0.533333	0.356567
34	7	6	0.4	0.428619
34	8	6	0.466667	0.411618
34	9	6	0.357143	0.284485
35	1	6	0.266667	0.455538
35	10	6	0.428571	0.362204
35	2	6	0.266667	0.324407
35	3	6	0.266667	0.323614
35	4	6	0.4	0.358833
35	5	6	0.133333	0.442066
35	6	6	0.466667	0.342602
35	7	6	0.2	0.410546
35	8	6	0.4	0.408868
35	9	6	0.428571	0.303476
36	1	6	0.4	0.414989
36	10	6	0.357143	0.367317
36	2	6	0.2	0.273713
36	3	6	0.4	0.294559
36	4	6	0.466667	0.393522
36	5	6	0.133333	0.429546
36	6	6	0.466667	0.335288
36	7	6	0.333333	0.395096
36	8	6	0.333333	0.405876
36	9	6	0.357143	0.330355
37	1	6	0.333333	0.390344
37	10	6	0.357143	0.365691
37	2	6	0.2	0.284459
37	3	6	0.4	0.278424
37	4	6	0.533333	0.413026
37	5	6	0.133333	0.420014
37	6	6	0.466667	0.335661
37	7	6	0.333333	0.362535
37	8	6	0.333333	0.419171
37	9	6	0.357143	0.328828
38	1	6	0.4	0.371556
38	10	6	0.285714	0.352756
38	2	6	0.333333	0.29319
38	3	6	0.4	0.270205
38	4	6	0.466667	0.433316
38	5	6	0.2	0.416895
38	6	6	0.466667	0.33975
38	7	6	0.533333	0.396453
38	8	6	0.466667	0.436449
38	9	6	0.214286	0.346117
39	1	6	0.333333	0.356233
39	10	6	0.285714	0.364932
39	2	6	0.266667	0.319436
39	3	6	0.4	0.261485
39	4	6	0.4	0.430593
39	5	6	0.2	0.426514
39	6	6	0.466667	0.331179
39	7	6	0.533333	0.433662
39	8	6	0.4	0.438882
39	9	6	0.214286	0.369628
40	1	6	0.266667	0.34193
40	10	6	0.428571	0.378545
40	2	6	0.4	0.335013
40	3	6	0.466667	0.271724
40	4	6	0.4	0.433094
40	5	6	0.2	0.442702
40	6	6	0.4	0.323202
40	7	6	0.4	0.455381
40	8	6	0.4	0.44591
40	9	6	0.142857	0.397214
41	1	6	0.266667	0.35398
41	10	6	0.428571	0.387258
41	2	6	0.333333	0.336857
41	3	6	0.466667	0.304023
41	4	6	0.333333	0.462879
41	5	6	0.133333	0.483457
41	6	6	0.4	0.32568
41	7	6	0.466667	0.464565
41	8	6	0.4	0.464406
41	9	6	0.142857	0.451873
42	1	6	0.266667	0.359747
42	10	6	0.357143	0.39805
42	2	6	0.4	0.338912
42	3	6	0.4	0.36888
42	4	6	0.333333	0.481933
42	5	6	0.133333	0.510491
42	6	6	0.4	0.328075
42	7	6	0.533333	0.462416
42	8	6	0.333333	0.49086
42	9	6	0.214286	0.508952
43	1	6	0.266667	0.307611
43	10	6	0.285714	0.391392
43	2	6	0.4	0.355154
43	3	6	0.4	0.379939
43	4	6	0.333333	0.495789
43	5	6	0.133333	0.528781
43	6	6	0.4	0.319937
43	7	6	0.533333	0.488914
43	8	6	0.333333	0.499959
43	9	6	0.214286	0.557343
44	1	6	0.214286	0.292509
44	10	6	0.285714	0.397227
44	2	6	0.466667	0.373138
44	3	6	0.4	0.394418
44	4	6	0.4	0.508985
44	5	6	0.2	0.525154
44	6	6	0.4	0.342276
44	7	6	0.533333	0.498338
44	8	6	0.357143	0.514412
44	9	6	0.142857	0.603584
45	1	6	0.142857	0.30509
45	10	6	0.285714	0.389813
45	2	6	0.4	0.390077
45	3	6	0.4	0.408165
45	4	6	0.4	0.514722
45	5	6	0.266667	0.545307
45	6	6	0.4	0.381831
45	7	6	0.428571	0.533168
45	8	6	0.357143	0.475336
45	9	6	0.142857	0.63572
46	1	6	0.428571	0.306564
46	10	6	0.285714	0.394755
46	2	6	0.333333	0.415389
46	3	6	0.533333	0.415989
46	4	6	0.466667	0.517386
46	5	6	0.357143	0.5639
46	6	6	0.466667	0.398735
46	7	6	0.357143	0.483704
46	8	6	0.428571	0.504856
46	9	6	0.0714286	0.657946
47	1	6	0.428571	0.321518
47	10	6	0.285714	0.397812
47	2	6	0.333333	0.428388
47	3	6	0.533333	0.412457
47	4	6	0.466667	0.537473
47	5	6	0.357143	0.512868
47	6	6	0.466667	0.40748
47	7	6	0.285714	0.484037
47	8	6	0.428571	0.550291
47	9	6	0.0714286	0.677595
48	1	6	0.357143	0.345224
48	10	6	0.285714	0.41205
48	2	6	0.333333	0.432001
48	3	6	0.6	0.412493
48	4	6	0.4	0.551244
48	5	6	0.285714	0.501747
48	6	6	0.466667	0.415807
48	7	6	0.214286	0.490794
48	8	6	0.357143	0.576189
48	9	6	0.142857	0.693742
49	1	6	0.357143	0.380132
49	10	6	0.285714	0.396071
49	2	6	0.333333	0.45282
49	3	6	0.6	0.428234
49	4	6	0.333333	0.568046
49	5	6	0.285714	0.546036
49	6	6	0.466667	0.41724
49	7	6	0.214286	0.504497
49	8	6	0.357143	0.602115
49	9	6	0.142857	0.704212
50	1	6	0.5	0.405509
50	10	6	0.307692	0.3822
50	2	6	0.333333	0.47582
50	3	6	0.533333	0.43392
50	4	6	0.333333	0.583934
50	5	6	0.285714	0.549127
50	6	6	0.4	0.412818
50	7	6	0.142857	0.529843
50	8	6	0.214286	0.621898
50	9	6	0.142857	0.712519
51	1	6	0.5	0.424581
51	10	6	0.307692	0.369761
51	2	6	0.357143	0.516524
51	3	6	0.6	0.445786
51	4	6	0.333333	0.558215
51	5	6	0.384615	0.551711
51	6	6	0.4	0.428583
51	7	6	0.142857	0.53419
51	8	6	0.214286	0.638518
51	9	6	0.142857	0.686166
52	1	6	0.5	0.432705
52	10	6	0.272727	0.35633
52	2	6	0.285714	0.571868
52	3	6	0.6	0.461082
52	4	6	0.266667	0.537396
52	5	6	0.461538	0.437865
52	6	6	0.333333	0.43363
52	7	6	0.230769	0.530688
52	8	6	0.307692	0.63696
52	9	6	0.230769	0.656122
53	1	6	0.5	0.432461
53	10	6	0.272727	0.33258
53	2	6	0.214286	0.585224
53	3	6	0.533333	0.460064
53	4	6	0.2	0.540593
53	5	6	0.461538	0.447262
53	6	6	0.333333	0.443692
53	7	6	0.230769	0.538314
53	8	6	0.307692	0.689489
53	9	6	0.230769	0.612967
54	1	6	0.357143	0.425759
54	10	6	0.333333	0.322871
54	2	6	0.357143	0.610188
54	3	6	0.533333	0.458006
54	4	6	0.142857	0.541667
54	5	6	0.384615	0.441706
54	6	6	0.4	0.445594
54	7	6	0.153846	0.5154
54	8	6	0.307692	0.69978
54	9	6	0.111111	0.602538
55	1	6	0.357143	0.429889
55	10	6	0.333333	0.386787
55	2	6	0.428571	0.647958
55	3	6	0.6	0.478395
55	4	6	0.142857	0.546947
55	5	6	0.384615	0.443374
55	6	6	0.4	0.434078
55	7	6	0.153846	0.511472
55	8	6	0.307692	0.703337
55	9	6	0.111111	0.698487
56	1	6	0.5	0.426532
56	10	6	0.25	0.387097
56	2	6	0.357143	0.678081
56	3	6	0.6	0.499276
56	4	6	0.214286	0.536053
56	5	6	0.384615	0.439748
56	6	6	0.333333	0.415804
56	7	6	0.0833333	0.503994
56	8	6	0.25	0.700454
56	9	6	0.166667	0.645669
57	1	6	0.5	0.437613
57	10	6	0.25	0.452138
57	2	6	0.357143	0.691563
57	3	6	0.6	0.51294
57	4	6	0.214286	0.547959
57	5	6	0.384615	0.457159
57	6	6	0.333333	0.405438
57	7	6	0.0833333	0.517056
57	8	6	0.363636	0.674408
57	9	6	0.166667	0.643576
58	1	6	0.5	0.445498
58	2	6	0.384615	0.693597
58	3	6	0.266667	0.539712
58	4	6	0.214286	0.533006
58	5	6	0.363636	0.456503
58	6	6	0.333333	0.387852
58	7	6	0.181818	0.506846
58	8	6	0.444444	0.663398
58	9	6	0.25	0.63632
59	1	6	0.5	0.436887
59	2	6	0.384615	0.479147
59	3	6	0.214286	0.56596
59	4	6	0.230769	0.546501
59	5	6	0.4	0.481904
59	6	6	0.333333	0.39536
59	7	6	0.2	0.432336
59	8	6	0.444444	0.586933
59	9	6	0.333333	0.771516
60	1	6	0.384615	0.430314
60	2	6	0.384615	0.485676
60	3	6	0.230769	0.614372
60	4	6	0.166667	0.567419
60	5	6	0.333333	0.525811
60	6	6	0.142857	0.382452
60	7	6	0.166667	0.37846
61	1	6	0.384615	0.436729
61	2	6	0.384615	0.485035
61	3	6	0.272727	0.635909
61	4	6	0.166667	0.646867
61	5	6	0.333333	0.508504
61	6	6	0.142857	0.417362
61	7	6	0.166667	0.348463
62	1	6	0.272727	0.460491
NA	NA	NA	NA	NA
62	2	6	0.571429	0.481067
62	3	6	0.3	0.608079
62	4	6	0.333333	0.664129
62	5	6	0.6	0.480484
62	6	6	0.285714	0.388004
62	7	6	0.4	0.334974
63	1	6	0.272727	0.517477
63	2	6	0.571429	0.433578
63	3	6	0.333333	0.647208
63	4	6	0.333333	0.613456
63	5	6	0.4	0.448481
63	6	6	0.333333	0.360561
63	7	6	0.4	0.341499
64	1	6	0.181818	0.509753
64	2	6	0.6	0.434029
64	3	6	0.285714	0.626028
64	4	6	0.4	0.624832
64	6	6	0.25	0.209486
64	7	6	0.5	0.315257
NA	NA	NA	NA	NA
65	1	6	0.181818	0.508495
65	2	6	0.666667	0.245058
65	3	6	0.285714	0.717349
65	4	6	0.4	0.570511
65	6	6	0.25	0.249889
65	7	6	0.5	0.331222
66	1	6	0.333333	0.509473
66	2	6	0.5	0.126483
66	7	6	0.5	0.319785
67	1	6	0.428571	0.47099
67	2	6	0.5	0.191681
67	7	6	0.5	0.282225
68	1	6	0.333333	0.355558
69	1	6	0.333333	0.392994
