# Supplementary material for: 3D cell neighbour dynamics in growing pseudostratified epithelia
Source: eLife. 2021 Oct 5;10:e68135. doi: 10.7554/eLife.68135 (PMC8570695; doi:10.7554/eLife.68135)
Supplement: Figure 7—source data 3. [file elife-68135-fig7-data3.xls]

## Sheet: AW_data
n	m	timepoint
4	6.25	1
5	6.31667	1
6	6.18056	1
7	5.80952	1
2	6	10
3	6.88889	10
4	6.98077	10
5	6.5	10
6	6.22454	10
7	6.09852	10
8	5.80147	10
9	5.8	10
4	6.66667	2
5	6.425	2
6	6.16667	2
7	5.91597	2
8	5.875	2
5	6.46667	3
6	6.07246	3
7	5.89286	3
1	7.66667	4
4	6.6875	4
5	6.28571	4
6	6.20513	4
7	5.9011	4
8	5.20833	4
3	7.33333	5
4	6.75	5
5	6.30909	5
6	6.02381	5
7	5.94643	5
8	5.625	5
9	5.66667	5
4	6.83333	6
5	6.4	6
6	6.08333	6
7	5.96429	6
8	5.675	6
3	6.66667	7
4	6.78571	7
5	6.36	7
6	6.17037	7
7	5.98496	7
8	5.83654	7
9	5.59259	7
3	7.33333	8
4	6.8125	8
5	6.40976	8
6	6.17708	8
7	5.9064	8
8	5.79167	8
9	5.62222	8
3	7.11111	9
4	6.8875	9
5	6.455	9
6	6.2381	9
7	5.95102	9
8	5.875	9
9	5.6	9
10	5.65	9
